# Supplementary material for: Functional Precision Medicine Identifies Novel Druggable Targets and Therapeutic Options in Head and Neck Cancer
Source: Oxford University Press journal article supplement (doi:10.1158/1078-0432.ccr-17-1339), 2018-03-29
Supplement: 10780432ccr171339-sup-183108_2_supp_4635983_p5t45t.xlsx [file 10780432ccr171339-sup-183108_2_supp_4635983_p5t45t.xlsx]

## Sheet: description
Supplementary file 4: FHCRC-SCC-1 screened with druggable siRNA library and HNSCC cell lines screened with kinome siRNA library results
header	description
Gene_ID	Entrez gene id
Gene_symbol	Hugo gene symbol (at the time of screening)
Approved.symbol	Hugo gene symbol (current)
Approved.name	Gene name
HGNC.ID	HGNC gene id
Location	Chromosomal location
Well_ID	Well identifier: <plate><plate_row><plate_column>
Species	Species
Accession_number	Accession number
Pct_normalization_control_Replicate_1	Percent viability normalized to mock for respective gene
Pct_normalization_control_Replicate_2	Percent viability normalized to mock for respective gene
Pct_normalization_control_Replicate_3	Percent viability normalized to mock for respective gene
Plate_based_z_score_Replicate_1	Plate-based MAD-based Z score (plate-based robust Z-score)
Plate_based_z_score_Replicate_2	Plate-based MAD-based Z score (plate-based robust Z-score)
Plate_based_z_score_Replicate_3	Plate-based MAD-based Z score (plate-based robust Z-score)
Mean	Mean of replicant % viability
Z_Score	Library-based Z-score of mean % viability
P_value_2_tail	T-tast p-value (2 tail) of 3 reps viability to whole library
Q_value	FDR correction of p-value
Hits	Indicator variable: -1 = ESG
IC0_DG.1STRONG.HITS	Indicator variable: -1 = top 1% strong hit (see methods)
IC0_DG.10STRONG.HITS	Indicator variable: -1 = top 10% strong hit (see methods)
IC0_DG.2WEAK.HITS	Indicator variable: -1 = weak hit with plate-based Z-score ≤ -2 (see methods)
TCGA.MUT.RAT	Mutation ratio in TCGA
Cell_line	Cell line

## Sheet: FHCRC-SCC-1
Gene_ID	Gene_symbol	Approved.symbol	Approved.name	HGNC.ID	Location	Well_ID	Species	Accession_number	Pct_normalization_control_Replicate_1	Pct_normalization_control_Replicate_2	Pct_normalization_control_Replicate_3	Plate_based_z_score_Replicate_1	Plate_based_z_score_Replicate_2	Plate_based_z_score_Replicate_3	Mean	Z_Score	P_value_2_tail	Q_value	Hits	IC0_DG.1STRONG.HITS	IC0_DG.10STRONG.HITS	IC0_DG.2WEAK.HITS	TCGA.MUT.RAT
286495	LOC286495					hDG20L04	human	XM_208438	84.3704	179.916	37.8776	-0.463712	1.79353	-1.01677	100.721	0.332519	0.645016	0.573128	0	0	0	0	NA
392425	LOC392425					hDG20N06	human	XM_373338	167.926	127.932	115.823	1.5176	0.613173	1.58052	137.227	1.35185	0.0610575	0.238478	0	0	0	0	NA
51765	RP6-213H19.1					K02M20	human	NM_016542	78.2514	48.017	56.7285	0.299774	-1.12415	-0.431232	60.999	-0.776612	0.281885	0.415286	0	0	0	0	NA
54886	RP11-35N6.1					hDG27K08	human	NM_207299	49.8445	70.8686	109.681	-1.15009	-0.813357	-0.0646772	76.798	-0.335469	0.642052	0.572575	0	0	0	0	NA
93432	LOC93432					hDG11G16	human	NM_001008748	38.3503	47.922	62.8189	-0.867202	-0.170871	0.0243792	49.6971	-1.09218	0.130193	0.321777	0	0	0	0	NA
122134	LOC122134					K02A18	human	XM_062966	94.4364	74.0793	72.7057	0.824378	-0.477764	0.0331717	80.4071	-0.234694	0.745028	0.603932	0	0	0	0	NA
138412	LOC138412					hDG12M10	human	AF091236	70.8711	102.521	88.0051	-0.125263	0	0.200524	87.1322	-0.0469142	0.948169	0.649796	0	0	0	0	NA
63928	LOC63928					hDG27I10	human	NM_022097	38.3243	10.4167	27.7447	-1.53058	-1.87469	-1.41366	25.4952	-1.76795	0.0143021	0.13905	-1	0	-1	0	NA
647798	LOC647798					hDG02L17	human	XM_936860	105.423	71.944	36.7515	1.82822	0.580997	-0.708704	71.3729	-0.486949	0.499854	0.518454	0	0	0	0	NA
79779	FLJ22332					hDG19M11	human	NM_024724	131.454	119.468	42.464	0.950788	0.674491	-1.44661	97.7951	0.250817	0.728197	0.598608	0	0	0	0	NA
80137	FLJ14106					hDG18N09	human	NM_025067	51.9077	20.5106	39.7426	-0.367904	-1.28766	-0.469211	37.387	-1.43591	0.0466386	0.219726	-1	0	-1	0	NA
29012	PRO1578					hDG19E10	human	NM_014093	146.773	84.193	103.277	1.38961	-0.208176	0.0976237	111.414	0.631091	0.381877	0.467995	0	0	0	0	NA
51255	LOC51255					hDG18G16	human	NM_016494	70.1823	55.1277	28.5662	0.4555	0.46426	-1.0264	51.292	-1.04765	0.146605	0.336256	0	0	0	0	NA
51776	ZAK					K03I07	human	NM_016653	177.757	179.447	173.319	1.34898	1.38808	1.50527	176.841	2.45795	0.000660692	0.0279755	1	0	1	0	NA
150763	LOC150763					hDG31E19	human	NM_207328	105.911	57.5781	82.6383	0.201816	-0.665123	-0.255841	82.0424	-0.189034	0.793374	0.613963	0	0	0	0	NA
91431	LOC91431					hDG23C18	human	NM_138698	145.264	81.0105	71.7126	0.626799	-0.965448	-1.03712	99.3291	0.293648	0.684097	0.585093	0	0	0	0	NA
91461	LOC91461					K01J16	human	NM_138370	148.487	156.715	145.314	0.873988	1.65946	0.889953	150.172	1.71329	0.0176027	0.151146	1	0	1	0	NA
93432	LOC93432					hDG11E16	human	XM_001134452	121.478	104.786	89.3733	2.00865	2.05945	1.11332	105.213	0.457931	0.525737	0.529505	0	0	0	0	NA
120824	LOC120824					hDG20N21	human	XM_062300	99.1852	113.08	82.5906	-0.112415	0.275928	0.47315	98.2853	0.264504	0.713986	0.594245	0	0	0	0	NA
126520	LOC126520					K02C09	human	XM_059051	114.09	82.0113	85.6396	1.4614	-0.281038	0.409117	93.9135	0.142433	0.843545	0.625815	0	0	0	0	NA
166657	LOC166657					hDG20F04	human	XM_093998	133.556	96.2025	17.3338	0.702595	-0.107305	-1.70133	82.364	-0.180055	0.802996	0.617138	0	0	0	0	NA
196515	FLJ30092					hDG18L06	human	XM_942665	27.8007	40.2423	34.4485	-1.4541	-0.289067	-0.733142	34.1639	-1.52591	0.0344929	0.197728	-1	0	-1	0	NA
63929	LOC63929					hDG28F18	human	NM_022098	53.8353	61.8376	44.0362	-0.643119	-1.01174	-0.979787	53.2364	-0.99336	0.168692	0.347671	0	0	0	0	NA
203427	LOC203427					hDG30C15	human	NM_145305	76.8489	71.6684	76.3519	-0.189701	-0.674491	-0.562076	74.9564	-0.38689	0.591894	0.552856	0	0	0	0	NA
392197	LOC392197					hDG20L06	human	XM_373243	105.111	119.831	123.678	0.0281038	0.429221	1.84227	116.207	0.764912	0.289196	0.420601	0	0	0	0	NA
399818	LOC399818					hDG06I18	human	NM_212554	11.7203	25.3188	44.3468	-1.07227	-0.748072	-0.0944287	27.1286	-1.72234	0.0170144	0.150295	-1	0	-1	0	NA
554251	LOC554251					hDG19F15	human	NM_001024680	83.227	148.752	57.8419	-0.430699	1.40727	-1.05611	96.607	0.21764	0.762989	0.608452	0	0	0	0	NA
283130	LOC283130					hDG30E15	human	NM_182556	164.309	121.998	112.241	1.42275	0.793519	0.553428	132.849	1.2296	0.0884341	0.279699	0	0	0	0	NA
283871	LOC283871					hDG27G14	human	XM_208887	70.5286	94.0325	110.242	-0.466955	-0.406678	-0.0554376	91.601	0.0778637	0.914082	0.643749	0	0	0	0	NA
442213	RP3-402H5.2					hDG07C04	human	NM_001013732	124.904	87.0096	64.3376	1.34898	1.0067	-0.300516	92.0836	0.091339	0.899288	0.640362	0	0	0	0	NA
90826	LOC90826					hDG31C19	human	NM_138364	153.474	175.781	96.157	1.1153	1.15226	0.0325616	141.804	1.47964	0.040357	0.208183	1	0	1	0	NA
339977	LOC339977					hDG07C11	human	NM_001024611	75.5429	71.2326	67.714	-0.532167	0.0805362	-0.180309	71.4965	-0.483498	0.502885	0.520104	0	0	0	0	NA
92312	LOC92312					hDG20H21	human	XM_044166	82	90.8017	47.5453	-0.51992	-0.22994	-0.694625	73.449	-0.42898	0.552239	0.54107	0	0	0	0	NA
84061	RP11-217H1.1					hDG31O12	human	NM_032121	37.8845	27.7228	79.1496	-1.10468	-1.12415	-0.330268	48.2523	-1.13253	0.116598	0.307176	0	0	0	0	NA
400708	LOC400708					hDG27J12	human	AK094504	95.6636	27.9308	14.8369	0.363187	-1.5672	-1.62617	46.1437	-1.1914	0.0987912	0.289967	0	0	0	0	NA
440434	LOC440434&AMP;NPEPPS					hDG28L14	human	AK021884	18.9303	100.729	34.6645	-1.61564	-0.168623	-1.29218	51.4414	-1.04348	0.148233	0.336948	0	0	0	0	NA
113691	MGC16703					hDG02K08	human	NM_145042	55.3802	61.4476	87.0509	-0.106499	0.180309	1.34409	67.9596	-0.582257	0.419785	0.485646	0	0	0	0	NA
442247	LOC442247					hDG18F08	human	NM_001013734	75.6258	56.5123	38.5662	0.70077	0.534337	-0.527862	56.9014	-0.891024	0.216973	0.378034	0	0	0	0	NA
651204	LOC651204					hDG27O21	human	XM_940335	79.4305	171.434	166.924	-0.172946	0.952222	0.877762	139.263	1.40868	0.0509704	0.226632	0	0	0	0	NA
388419	LOC388419					hDG19E08	human	XM_371078	109.894	74.8752	96.2866	0.333182	-0.441333	-0.0798739	93.6851	0.136057	0.850464	0.627535	0	0	0	0	NA
389816	RP11-350O14.10					hDG05N12	human	NM_001013653	73.2001	55.6099	140.84	-0.69055	-1.09706	2.23224	89.8834	0.0299043	0.966949	0.654979	0	0	0	0	NA
390233	LOC390233					hDG19G20	human	XM_372424	40.1064	47.5874	47.3569	-1.66591	-1.12415	-1.32236	45.0169	-1.22287	0.0901874	0.281165	0	0	0	0	NA
157285	DKFZP761P0423					hDG21M11	human	XM_291277	75.7823	74.6787	56.3704	-0.532493	-1.03641	-1.26804	68.9438	-0.554775	0.44206	0.496475	0	0	0	0	NA
391849	LOC391849					hDG20J06	human	XM_373101	46.4444	76.6245	55.4003	-1.36303	-0.551856	-0.432882	59.4897	-0.818753	0.256592	0.399094	0	0	0	0	NA
401848	LOC401848					hDG21M09	human	XM_497504	215.102	102.442	95.4815	1.73948	-0.592236	-0.377715	137.675	1.36436	0.0587259	0.236449	0	0	0	0	NA
124923	FLJ25006					K02B18	human	NM_144610	59.7543	92.2096	71.184	-0.299774	-0.0281038	-0.0110572	74.3827	-0.40291	0.576648	0.548674	0	0	0	0	NA
441061	LOC441061					hDG20J08	human	XM_496738	114	100.253	82.5906	0.238882	-0.0153293	0.47315	98.9479	0.283005	0.694952	0.587908	0	0	0	0	NA
442075	LOC442075					K01E03	human	AK092352	90.7588	91.0145	103.435	-0.598492	-0.160593	-0.159255	95.0696	0.174713	0.808709	0.619129	0	0	0	0	NA
442447	LOC442447					hDG19O20	human	XM_498359	95.7092	92.8453	117.256	-0.0731376	0.00832705	0.452619	101.937	0.366466	0.6116	0.561202	0	0	0	0	NA
84451	KIAA1804					K02B15	human	NM_032435	69.0029	117.139	71.184	0	0.590179	-0.0110572	85.7752	-0.0848047	0.906458	0.641679	0	0	0	0	NA
493869	LOC493869					hDG25P22	human	NM_001008397	52.0588	68.2596	113.841	-1.51606	-1.00424	0.252934	78.0531	-0.300424	0.677211	0.583473	0	0	0	0	NA
653462	LOC653462					hDG19I20	human	XM_377836	109.894	116.14	138.226	0.333182	0.59122	0.985112	121.42	0.910471	0.207105	0.372897	0	0	0	0	NA
653465	LOC653465					hDG20B08	human	XM_377837	63.037	108.354	139.992	-0.96958	0.168623	2.38589	103.795	0.418336	0.562154	0.543353	0	0	0	0	NA
728683	LOC728683					hDG06J05	human	XM_001128151	11.9482	16.0244	12.9467	-1.06733	-0.949192	-0.998246	13.6397	-2.09898	0.0036355	0.0719726	-1	-1	-1	0	NA
136242	LOC136242					hDG28F12	human	NM_001008270	97.1851	177.735	72.5772	0.56469	1.50074	-0.0283996	115.832	0.754453	0.295874	0.424326	0	0	0	0	NA
92755	LOC92755					hDG02I08	human	XR_016140	54.0029	70.1946	49.2066	-0.159748	0.514216	-0.200392	57.8014	-0.865896	0.230214	0.383755	0	0	0	0	NA
391257	LOC391257					hDG19P03	human	NR_002189	139.397	75.5408	105.374	1.17833	-0.424679	0.150873	106.77	0.501428	0.48719	0.514623	0	0	0	0	NA
158381	LOC158381					hDG09M22	human	BC031276	67.9423	53.1873	72.5152	-0.136853	-0.505868	0.227356	64.5483	-0.677507	0.347845	0.451102	0	0	0	0	NA
401934	LOC401934					hDG21K09	human	XM_377555	49.6599	29.4344	189.111	-0.958487	-1.76026	1.75368	89.4018	0.0164569	0.98181	0.660456	0	0	0	0	NA
219995	MGC35295					hDG06I05	human	NM_152717	74.1527	62.7232	30.7557	0.281655	0.0613173	-0.485633	55.8772	-0.919623	0.202579	0.370452	0	0	0	0	NA
124221	MGC52282					hDG28D12	human	NM_178453	119.141	68.8381	98.1363	1.17644	-0.859976	0.823589	95.372	0.183156	0.79966	0.616042	0	0	0	0	NA
89944	LOC89944					hDG11L11	human	NM_138342	42.6352	69.4755	38.2462	-0.718963	0.674491	-0.983294	50.119	-1.0804	0.134389	0.325842	0	0	0	0	NA
339745	LOC339745					hDG19N05	human	NM_001001664	144.504	148.087	49.4539	1.3246	1.39062	-1.26911	114.015	0.703701	0.329559	0.443641	0	0	0	0	NA
92270	LOC92270					hDG12I10	human	NM_001017971	41.2298	142.027	95.4125	-1.03101	0.809389	0.401049	92.8897	0.113846	0.874661	0.634861	0	0	0	0	NA
390358	LOC390358					hDG19K08	human	XM_497353	59.9645	148.087	68.3268	-1.09706	1.39062	-0.789864	92.1259	0.0925208	0.897995	0.639902	0	0	0	0	NA
390975	LOC390975					K03C07	human	XM_372749	90.5388	86.7251	44.5424	-0.082255	-0.293257	-0.896579	73.9355	-0.415397	0.564896	0.544352	0	0	0	0	NA
440458	LOC440458					hDG19M20	human	XM_496240	54.2908	134.11	109.567	-1.25959	1.04088	0.257371	99.3227	0.29347	0.68428	0.585093	0	0	0	0	NA
440607	LOC440607					hDG06B22	human	NM_001017986	127.699	143.653	110.428	1.44287	1.81254	1.80764	127.26	1.07353	0.136885	0.328035	0	0	0	0	NA
400927	LOC400927					hDG27D21	human	AK124064	95.9254	106.462	147.843	0.371835	-0.188461	0.563616	116.743	0.779892	0.279863	0.414525	0	0	0	0	NA
121665	UNQ1887					hDG28H08	human	NM_139015	90.4293	141.954	77.263	0.37646	0.725078	0.127798	103.216	0.402166	0.57736	0.548674	0	0	0	0	NA
441868	LOC441868					hDG27E16	human	XM_497647	83.0961	136.97	147.843	-0.0518839	0.347164	0.563616	122.636	0.944439	0.190669	0.363291	0	0	0	0	NA
388439	FLJ12120					hDG20P06	human	XM_373765	92.6667	98.2278	57.213	-0.266986	-0.0613173	-0.37248	82.7025	-0.170602	0.813128	0.620029	0	0	0	0	NA
388514	LOC388514					hDG25N22	human	XR_019249	181.807	163.552	167.82	0.872506	1.49887	1.56819	171.06	2.29652	0.00146368	0.0443653	1	0	1	0	NA
253665	LOC253665					hDG20J04	human	XM_171447	97.4074	142.11	48.7538	-0.154571	0.935089	-0.654357	96.0903	0.203214	0.778274	0.611605	0	0	0	0	NA
338821	LST-3TM12					hDG12G12	human	NM_001009562	113.756	85.2366	73.8636	1.18518	-0.354108	-0.182295	90.9522	0.0597478	0.934019	0.647854	0	0	0	0	NA
197350	LOC197350					hDG28N12	human	XM_940028	164.743	159.844	73.0032	2.44699	1.11291	-0.0141998	132.53	1.2207	0.0907801	0.281367	0	0	0	0	NA
400301	LOC400301					K02E09	human	XM_375150	88.6561	101.275	86.4004	0.637019	0.196726	0.431232	92.1104	0.092087	0.898465	0.640041	0	0	0	0	NA
390594	LOC390594					hDG20H06	human	XM_372573	102.148	74.5992	60.2341	-0.0421557	-0.597844	-0.27181	78.9938	-0.274157	0.704033	0.590733	0	0	0	0	NA
255324	UNQ3072					hDG09P04	human	NM_001013442	80.2986	68.9757	137.83	0.303032	0.142681	2.66765	95.7013	0.192353	0.789835	0.613035	0	0	0	0	NA
402164	LOC402164					hDG21I09	human	XM_376305	130.204	141.517	174.889	0.354995	0.032902	1.42992	148.87	1.67693	0.0201539	0.158953	1	0	1	0	NA
123103	LOC123103					hDG20P21	human	XM_063481	68.963	134.008	94.071	-0.829062	0.751137	0.855697	99.0141	0.284854	0.693066	0.587375	0	0	0	0	NA
729978	LOC729978					hDG11M16	human	XM_001131942	37.4933	29.1201	60.0446	-0.89685	-0.908314	-0.0893903	42.2193	-1.30098	0.0714469	0.25637	0	0	0	0	NA
283999	LOC283999					hDG12H17	human	XM_211287	34.9231	84.4136	41.5404	-1.22372	-0.37097	-1.05731	53.6257	-0.982489	0.173408	0.351325	0	0	0	0	NA
136306	LOC136306					hDG12K10	human	NM_174959	63.3031	71.2449	76.5572	-0.356517	-0.640766	-0.109377	70.3684	-0.514997	0.475473	0.509407	0	0	0	0	NA
441173	FLJ39824					hDG23G18	human	AK097143	121.868	97.8298	140.914	0.0272522	-0.555463	0.761522	120.204	0.876515	0.224553	0.381196	0	0	0	0	NA
441511	LOC441511					hDG27C16	human	XM_497141	111.111	114.371	100.14	0.873379	-0.0495949	-0.22175	108.541	0.550863	0.445285	0.497033	0	0	0	0	NA
541473	LOC541473					hDG22E09	human	NM_001013748	94.4187	419.058	113.175	-0.160192	3.61334	1.16261	208.884	3.35266	3.47139e-06	0.000946984	1	1	1	1	NA
137886	LOC137886					hDG19A08	human	XM_059929	119.539	118.802	71.1228	0.60948	0.657837	-0.718865	103.155	0.400464	0.578968	0.549189	0	0	0	0	NA
131185	LOC131185					hDG20H08	human	XM_496632	159.63	122.532	52.3792	1.32088	0.490539	-0.533552	111.513	0.633863	0.379812	0.467584	0	0	0	0	NA
440140	TPTEPS1					hDG27A16	human	BC041842	77.8596	140.36	108.558	-0.22483	0.406678	-0.0831564	108.926	0.561616	0.436462	0.493805	0	0	0	0	NA
283514	LOC283514					hDG20P15	human	NM_198849	84.963	126.582	77.1526	-0.449661	0.582515	0.291944	96.2326	0.207187	0.774047	0.60976	0	0	0	0	NA
442428	LOC442428					hDG27F21	human	XM_498334	81.7869	57.8743	64.7843	-0.0951205	-1.04149	-0.803845	68.1485	-0.576981	0.424008	0.488535	0	0	0	0	NA
387601	LOC387601					hDG13F05	human	NM_199352	17.4288	54.9248	44.183	-1.78066	-0.667942	-1.14204	38.8456	-1.39518	0.0532194	0.230113	0	0	0	0	NA
340970	LOC340970					hDG20L08	human	XM_497278	118.741	126.582	52.3792	0.351297	0.582515	-0.533552	99.2341	0.290995	0.6868	0.585777	0	0	0	0	NA
340156	RP11-145H9.1					K01M08	human	NM_001012418	56.4944	81.3527	102.314	-1.47248	-0.428248	-0.187359	80.0536	-0.244566	0.734701	0.601007	0	0	0	0	NA
200312	LOC200312					hDG19P13	human	NM_001017981	73.0142	109.484	97.6846	-0.723249	0.424679	-0.0443744	93.3943	0.127936	0.859293	0.629679	0	0	0	0	NA
390231	LOC390231					hDG20F06	human	XM_372423	92.0741	138.059	83.1949	-0.281038	0.843113	0.493284	104.443	0.43643	0.545361	0.537574	0	0	0	0	NA
342931	LOC342931					hDG19E20	human	XM_292796	77.5532	142.762	94.1896	-0.593227	1.25738	-0.133123	104.835	0.447384	0.535324	0.532437	0	0	0	0	NA
220594	LOC220594					hDG19K21	human	NM_145809	92.8723	82.8619	122.149	-0.154401	-0.241484	0.576867	99.2945	0.292684	0.685071	0.58528	0	0	0	0	NA
400687	FLJ30698					K03M17	human	XM_375602	25.3759	31.7385	22.4917	-1.15157	-1.29033	-1.30785	26.5354	-1.73891	0.0159807	0.145315	-1	0	-1	0	NA
653454	LOC653454					hDG19G08	human	XM_377832	100.248	133.444	50.8519	0.0568848	1.02423	-1.23361	94.8481	0.16853	0.815362	0.620166	0	0	0	0	NA
340571	LOC340571					hDG19C08	human	XM_293360	69.0426	86.8552	30.581	-0.837019	-0.14156	-1.74835	62.1596	-0.744204	0.302458	0.428451	0	0	0	0	NA
440059	LOC440059					hDG20F08	human	XM_495891	134.741	71.2236	41.503	0.730698	-0.674491	-0.895965	82.4891	-0.17656	0.806737	0.618082	0	0	0	0	NA
285962	FLJ40852					K02L18	human	NM_173677	40.1012	32.153	31.6215	-0.936793	-1.5176	-1.16101	34.6252	-1.51302	0.0360453	0.199475	-1	0	-1	0	NA
1	A1BG	A1BG	alpha-1-B glycoprotein	HGNC:5	19q13.43	hDG06K05	human	NM_130786	102.179	115.543	28.8811	0.889438	1.20427	-0.539593	82.2009	-0.184609	0.798112	0.61575	0	0	0	0	0.00980392
2	A2M	A2M	alpha-2-macroglobulin	HGNC:7	12p13.31	hDG09E16	human	NM_000014	45.701	36.7673	27.8905	-0.928647	-1.18036	-1.43992	36.7863	-1.45268	0.0441343	0.216799	-1	0	-1	0	0.00980392
13	AADAC	AADAC	arylacetamide deacetylase	HGNC:17	3q25.1	hDG11O16	human	NM_001086	47.7772	51.5907	44.5876	-0.541075	-0.0269796	-0.723249	47.9852	-1.13999	0.114204	0.305753	0	0	0	0	0.00653595
22848	AAK1	AAK1	AP2 associated kinase 1	HGNC:19679	2p13.3	K02O21	human	NM_014911	84.0318	68.4136	65.0975	0.487132	-0.618283	-0.187973	72.5143	-0.455079	0.528317	0.530626	0	0	0	0	0.00653595
10157	AASS	AASS	aminoadipate-semialdehyde synthase	HGNC:17366	7q31.3	hDG25H11	human	NM_005763	166.345	103.638	151.903	0.587859	-0.0749434	1.18036	140.628	1.44682	0.0450019	0.216979	1	0	1	0	NA
9625	AATK	AATK	apoptosis associated tyrosine kinase	HGNC:21	17q25.3	K01B17	human	NM_004920	96.7179	63.9614	153.914	-0.446494	-0.910027	1.10542	104.865	0.448211	0.534579	0.532345	0	0	0	0	0.00653595
18	ABAT	ABAT	4-aminobutyrate aminotransferase	HGNC:23	16p13.2	hDG31C03	human	NM_020686	123.609	124.6	121.014	0.541717	0.365349	0.562851	123.074	0.956664	0.18498	0.360086	0	0	0	0	0.0163399
19	ABCA1	ABCA1	ATP binding cassette subfamily A member 1	HGNC:29	9q31	hDG12J17	human	NM_005502	147.812	225.154	135.816	2.22582	2.51248	1.49482	169.594	2.25561	0.00177835	0.0491136	1	0	1	1	0.0196078
10349	ABCA10	ABCA10	ATP binding cassette subfamily A member 10	HGNC:30	17q24	hDG12L17	human	NM_080282	91.6831	146.965	108.207	0.510686	0.910563	0.747409	115.618	0.748481	0.299688	0.426667	0	0	0	0	0.0326797
26154	ABCA12	ABCA12	ATP binding cassette subfamily A member 12	HGNC:14637	2q34	hDG12N17	human	NM_173076	85.3764	190.586	116.961	0.317974	1.80426	0.984392	130.975	1.17726	0.102867	0.294084	0	0	0	0	0.0359477
154664	ABCA13	ABCA13	ATP binding cassette subfamily A member 13	HGNC:14638	7p12.3	hDG12P17	human	NM_152701	98.6204	100.051	73.8636	0.722669	-0.0505868	-0.182295	90.8452	0.0567585	0.937313	0.647994	0	0	0	0	0.0653595
20	ABCA2	ABCA2	ATP binding cassette subfamily A member 2	HGNC:32	9q34	hDG12B19	human	NM_212533	142.136	250.669	132.449	2.05238	3.03521	1.40367	175.085	2.40891	0.000846476	0.0338411	1	0	1	1	0.0163399
21	ABCA3	ABCA3	ATP binding cassette subfamily A member 3	HGNC:33	16p13.3	hDG12D19	human	NM_001089	45.0138	50.6687	74.537	-0.91538	-1.06232	-0.164065	56.7399	-0.895536	0.214653	0.376995	0	0	0	0	0.0130719
24	ABCA4	ABCA4	ATP binding cassette subfamily A member 4	HGNC:34	1p22	hDG13H13	human	NM_000350	63.7191	75.8855	89.6846	-0.107919	0.0392907	0.544191	76.4297	-0.345752	0.631875	0.569441	0	0	0	0	0.0294118
23461	ABCA5	ABCA5	ATP binding cassette subfamily A member 5	HGNC:35	17q24.3	hDG13J13	human	NM_172232	140.247	85.9777	66.1065	2.65749	0.37981	-0.329581	97.4438	0.241008	0.738424	0.601758	0	0	0	0	0.00980392
23460	ABCA6	ABCA6	ATP binding cassette subfamily A member 6	HGNC:36	17q21	hDG12F19	human	NM_080284	89.1604	104.99	81.271	0.433601	0.0505868	0.0182295	91.8071	0.0836168	0.907761	0.641679	0	0	0	0	0.0228758
10347	ABCA7	ABCA7	ATP binding cassette subfamily A member 7	HGNC:37	19p13.3	hDG12H19	human	NM_019112	41.2298	5.40123	37.5	-1.03101	-1.98975	-1.16669	28.0437	-1.69679	0.0187234	0.15468	-1	0	-1	0	0.00980392
10351	ABCA8	ABCA8	ATP binding cassette subfamily A member 8	HGNC:38	17q24	hDG12J19	human	NM_007168	82.8538	113.22	129.756	0.24089	0.219209	1.33075	108.61	0.55279	0.443701	0.496545	0	0	0	0	0.0163399
10350	ABCA9	ABCA9	ATP binding cassette subfamily A member 9	HGNC:39	17q24	hDG12N19	human	NM_080283	83.4844	136.265	95.4125	0.260161	0.691353	0.401049	105.054	0.453503	0.529753	0.530811	0	0	0	0	0.0228758
5243	ABCB1	ABCB1	ATP binding cassette subfamily B member 1	HGNC:40	7q21.12	hDG12P19	human	NM_000927	195.743	102.521	89.3519	3.69043	0	0.236983	129.205	1.12785	0.118137	0.308574	0	0	0	0	0.0326797
23456	ABCB10	ABCB10	ATP binding cassette subfamily B member 10	HGNC:41	1q32	hDG12B21	human	NM_012089	31.1391	29.2695	39.5202	-1.33935	-1.50074	-1.112	33.3096	-1.54976	0.0317688	0.190841	-1	0	-1	0	NA
8647	ABCB11	ABCB11	ATP binding cassette subfamily B member 11	HGNC:42	2q24	hDG12D21	human	NM_003742	82.8538	139.558	93.3923	0.24089	0.758802	0.34636	105.268	0.459472	0.524352	0.529477	0	0	0	0	0.0163399
5244	ABCB4	ABCB4	ATP binding cassette subfamily B member 4	HGNC:45	7q21	hDG13L13	human	NM_000443	152.94	172.149	82.2389	3.11615	3.28732	0.268263	135.776	1.31133	0.0692363	0.253222	0	0	0	0	0.0294118
340273	ABCB5	ABCB5	ATP binding cassette subfamily B member 5	HGNC:46	7p14	hDG13P13	human	NM_178559	67.8255	122.077	121.536	0.0404694	1.59782	1.72455	103.813	0.418838	0.56168	0.543353	0	0	0	0	0.0163399
10058	ABCB6	ABCB6	ATP binding cassette subfamily B member 6 (Langereis blood group)	HGNC:47	2q36	hDG12F21	human	NM_005689	83.4844	81.9444	34.8064	0.260161	-0.421557	-1.2396	66.7451	-0.616168	0.393231	0.472131	0	0	0	0	0.0163399
22	ABCB7	ABCB7	ATP binding cassette subfamily B member 7	HGNC:48	Xq13.3	hDG12H21	human	NM_004299	46.2751	43.2613	28.0724	-0.876838	-1.21408	-1.4219	39.2029	-1.3852	0.0549434	0.232601	0	0	0	0	0.0130719
11194	ABCB8	ABCB8	ATP binding cassette subfamily B member 8	HGNC:49	7q36.1	hDG12J21	human	NM_007188	52.5818	144.496	106.86	-0.684126	0.859976	0.71095	101.313	0.349033	0.62866	0.567819	0	0	0	0	0.00980392
23457	ABCB9	ABCB9	ATP binding cassette subfamily B member 9	HGNC:50	12q24	hDG12L21	human	NM_203444	111.864	98.4053	92.7189	1.12736	-0.0843113	0.328131	100.996	0.340198	0.63736	0.571165	0	0	0	0	NA
4363	ABCC1	ABCC1	ATP binding cassette subfamily C member 1	HGNC:51	16p13.1	K02F12	human	NM_004996	63.2225	63.881	47.5987	-0.187359	-0.730698	-0.696605	58.2341	-0.853814	0.236782	0.387165	0	0	0	0	NA
89845	ABCC10	ABCC10	ATP binding cassette subfamily C member 10	HGNC:52	6p12.3	hDG12N21	human	NM_033450	41.8605	95.1132	67.1296	-1.01174	-0.15176	-0.36459	68.0344	-0.580167	0.42146	0.486688	0	0	0	0	0.0163399
85320	ABCC11	ABCC11	ATP binding cassette subfamily C member 11	HGNC:14639	16q12	hDG12P21	human	NM_032583	104.296	68.7757	84.638	0.896109	-0.691353	0.109377	85.9034	-0.0812264	0.910387	0.642415	0	0	0	0	0.0130719
94160	ABCC12	ABCC12	ATP binding cassette subfamily C member 12	HGNC:14640	16q12.1	hDG13B15	human	NM_145189	70.4386	68.8986	24.7415	0.134898	-0.196454	-1.86251	54.6929	-0.952691	0.186818	0.361291	0	0	0	0	0.0163399
1244	ABCC2	ABCC2	ATP binding cassette subfamily C member 2	HGNC:53	10q24	hDG13D15	human	NM_000392	29.3747	56.4774	83.0662	-1.34898	-0.615555	0.298922	56.3061	-0.907647	0.208523	0.37352	0	0	0	0	0.00980392
8714	ABCC3	ABCC3	ATP binding cassette subfamily C member 3	HGNC:54	17q21	hDG12D04	human	NM_003786	80.3311	63.8374	90.6987	0.163805	-0.792527	0.273442	78.2891	-0.293835	0.683897	0.585093	0	0	0	0	0.00980392
10257	ABCC4	ABCC4	ATP binding cassette subfamily C member 4	HGNC:55	13q31	hDG12F04	human	NM_005845	83.4844	87.7058	122.348	0.260161	-0.303521	1.13023	97.8462	0.252243	0.726701	0.598066	0	0	0	0	NA
10057	ABCC5	ABCC5	ATP binding cassette subfamily C member 5	HGNC:56	3q27	hDG12H04	human	NM_005688	31.7698	69.5988	65.1094	-1.32007	-0.674491	-0.419278	55.4927	-0.93036	0.197357	0.366612	0	0	0	0	0.0163399
368	ABCC6	ABCC6	ATP binding cassette subfamily C member 6	HGNC:57	16p13.11	hDG12J04	human	NM_001171	80.9618	82.7675	96.7593	0.183076	-0.404694	0.437508	86.8295	-0.0553674	0.938846	0.648086	0	0	0	0	0.00653595
6833	ABCC8	ABCC8	ATP binding cassette subfamily C member 8	HGNC:59	11p15.1	hDG12L04	human	NM_000352	44.3831	53.1379	59.0488	-0.934651	-1.01174	-0.583343	52.1899	-1.02258	0.156511	0.341243	0	0	0	0	0.0359477
10060	ABCC9	ABCC9	ATP binding cassette subfamily C member 9	HGNC:60	12p12.1	hDG12N04	human	NM_020297	108.08	123.92	155.345	1.01174	0.438419	2.02347	129.115	1.12534	0.118935	0.308574	0	0	0	0	0.0392157
215	ABCD1	ABCD1	ATP binding cassette subfamily D member 1	HGNC:61	Xq28	hDG13F15	human	NM_000033	57.7462	42.5036	82.6525	-0.323756	-1.08704	0.283593	60.9674	-0.777492	0.281342	0.415286	0	0	0	0	0.00653595
225	ABCD2	ABCD2	ATP binding cassette subfamily D member 2	HGNC:66	12q12	hDG13H15	human	NM_005164	80.518	82.4842	30.1189	0.499123	0.261938	-1.66323	64.3737	-0.682382	0.344396	0.449521	0	0	0	0	0.0196078
5825	ABCD3	ABCD3	ATP binding cassette subfamily D member 3	HGNC:67	1p21.3	hDG12P04	human	NM_002858	173.039	142.027	188.342	2.99667	0.809389	2.91672	167.803	2.20557	0.00224476	0.0563081	1	0	1	1	0.00980392
9429	ABCG2	ABCG2	ATP binding cassette subfamily G member 2 (Junior blood group)	HGNC:74	4q22.1	hDG12B06	human	NM_004827	72.7631	50.6687	112.247	-0.0674491	-1.06232	0.856786	78.5598	-0.286276	0.691611	0.586672	0	0	0	0	0.00653595
64137	ABCG4	ABCG4	ATP binding cassette subfamily G member 4	HGNC:13884	11q23	hDG12D06	human	NM_022169	43.1218	29.2695	42.8872	-0.973194	-1.50074	-1.02085	38.4262	-1.40689	0.0512507	0.22766	0	0	0	0	0.0130719
64240	ABCG5	ABCG5	ATP binding cassette subfamily G member 5	HGNC:13886	2p21	hDG12F06	human	NM_022436	43.7525	113.22	53.6616	-0.953923	0.219209	-0.729179	70.2114	-0.51938	0.471739	0.508001	0	0	0	0	NA
64241	ABCG8	ABCG8	ATP binding cassette subfamily G member 8	HGNC:13887	2p21	hDG12H06	human	NM_022437	32.4005	59.7222	34.8064	-1.3008	-0.876838	-1.2396	42.3097	-1.29846	0.0719978	0.256598	0	0	0	0	0.0196078
84696	ABHD1	ABHD1	abhydrolase domain containing 1	HGNC:17553	2p23.3	hDG11A18	human	NM_032604	124.478	133.219	70.3493	2.11242	3.1746	0.333182	109.349	0.573414	0.42689	0.49015	0	0	0	0	0.00326797
25864	ABHD14A	ABHD14A	abhydrolase domain containing 14A	HGNC:24538	3p21.1	hDG11C18	human	NM_015407	71.3444	79.1058	92.1476	0.274243	1.05221	1.22709	80.8659	-0.221883	0.758499	0.607945	0	0	0	0	0.00326797
11057	ABHD2	ABHD2	abhydrolase domain containing 2	HGNC:18717	15q26.1	hDG11E18	human	NM_007011	76.4863	62.1381	41.0206	0.452131	0.386708	-0.869524	59.8817	-0.807809	0.263005	0.402493	0	0	0	0	NA
171586	ABHD3	ABHD3	abhydrolase domain containing 3	HGNC:18718	18q11.1	hDG11G18	human	NM_138340	98.7681	100.659	120.684	1.22298	1.89757	2.39729	106.704	0.499562	0.488803	0.515075	0	0	0	0	0.00653595
63874	ABHD4	ABHD4	abhydrolase domain containing 4	HGNC:20154	14q11.1	hDG28A07	human	NM_022060	184.448	295.965	78.967	2.99599	4.06381	0.184597	186.46	2.72653	0.000159163	0.0134065	1	1	1	1	NA
51099	ABHD5	ABHD5	abhydrolase domain containing 5	HGNC:21396	3p21.33	hDG28C07	human	NM_016006	71.2878	57.9485	60.6496	-0.156858	-1.09605	-0.425994	63.2953	-0.712493	0.323517	0.44109	0	0	0	0	0.00980392
57406	ABHD6	ABHD6	abhydrolase domain containing 6	HGNC:21398	3p21.2	hDG11N11	human	NM_020676	38.3503	37.3746	57.2703	-0.867202	-0.584559	-0.20316	44.3317	-1.242	0.0852668	0.27568	0	0	0	0	NA
25	ABL1	ABL1	ABL proto-oncogene 1, non-receptor tyrosine kinase	HGNC:76	9q34.1	DDRD04	human	NM_005157 NM_007313	95.5879	70.8954	48.5485	-0.367904	-0.655437	-1.34898	71.6772	-0.478451	0.507359	0.52233	0	0	0	0	NA
25	ABL1	ABL1	ABL proto-oncogene 1, non-receptor tyrosine kinase	HGNC:76	9q34.1	K02F22	human	NM_007313	52.8179	62.7479	75.7489	-0.524604	-0.758802	0.121629	63.7716	-0.699195	0.332631	0.444536	0	0	0	0	NA
27	ABL2	ABL2	ABL proto-oncogene 2, non-receptor tyrosine kinase	HGNC:77	1q25.2	K02H22	human	NM_007314	89.8121	91.0765	100.856	0.674491	-0.0562076	0.851406	93.9148	0.142471	0.843503	0.625815	0	0	0	0	0.0228758
80325	ABTB1	ABTB1	ankyrin repeat and BTB domain containing 1	HGNC:18275	3q21	hDG19C19	human	NM_032548	67.3404	94.8419	85.8017	-0.885777	0.0582893	-0.34612	82.6613	-0.171752	0.811891	0.619606	0	0	0	0	0.00980392
25841	ABTB2	ABTB2	ankyrin repeat and BTB domain containing 2	HGNC:23842	11p13	hDG20M15	human	NM_145804	134.148	156.962	87.4245	0.716646	1.27233	0.634223	126.178	1.04333	0.148284	0.336948	0	0	0	0	0.00980392
30	ACAA1	ACAA1	acetyl-CoA acyltransferase 1	HGNC:82	3p22.2	hDG31E03	human	NM_001607	133.011	173.953	154.156	0.722289	1.12415	1.2699	153.707	1.81199	0.0120536	0.129089	1	0	1	0	NA
10449	ACAA2	ACAA2	acetyl-CoA acyltransferase 2	HGNC:83	18q21	hDG31G03	human	NM_006111	140.2	86.8241	76.097	0.860374	-0.215462	-0.395391	101.041	0.341435	0.636145	0.570626	0	0	0	0	0.00326797
31	ACACA	ACACA	acetyl-CoA carboxylase alpha	HGNC:84	17q12	hDG22G09	human	NM_000664	91.3147	372.422	111.531	-0.269796	2.98703	1.08274	191.756	2.8744	6.89624e-05	0.00813212	1	1	1	1	0.0359477
32	ACACB	ACACB	acetyl-CoA carboxylase beta	HGNC:85	12q24.1	hDG22L05	human	NM_001093	131.189	171.525	108.974	1.1382	0.289067	0.958487	137.229	1.3519	0.0610485	0.238478	0	0	0	0	0.0359477
33	ACADL	ACADL	acyl-CoA dehydrogenase, long chain	HGNC:88	2q34	hDG25J11	human	NM_001608	214.748	155.563	64.0138	1.47893	1.28903	-0.961149	144.775	1.5626	0.0304029	0.186996	1	0	1	0	0.00653595
34	ACADM	ACADM	acyl-CoA dehydrogenase, C-4 to C-12 straight chain	HGNC:89	1p31	hDG25E03	human	NM_000016	149.538	100.785	54.3253	0.278459	-0.149887	-1.19722	101.549	0.355639	0.622179	0.565177	0	0	0	0	0.00980392
35	ACADS	ACADS	acyl-CoA dehydrogenase, C-2 to C-3 short chain	HGNC:90	12q24.31	hDG25G03	human	NM_000017	136.765	152.14	66.09	0.0433159	1.19909	-0.910563	118.331	0.824236	0.253441	0.397369	0	0	0	0	0.00653595
37	ACADVL	ACADVL	acyl-CoA dehydrogenase, very long chain	HGNC:92	17p13.1	hDG25I03	human	NM_000018	80.9664	61.9829	32.1799	-0.98389	-1.16912	-1.73681	58.3764	-0.84984	0.238977	0.388048	0	0	0	0	0.00980392
38	ACAT1	ACAT1	acetyl-CoA acetyltransferase 1	HGNC:93	11q22.3	hDG31I03	human	NM_000019	125.821	123.991	124.939	0.584205	0.355981	0.646581	124.917	1.00811	0.162455	0.345117	0	0	0	0	NA
39	ACAT2	ACAT2	acetyl-CoA acetyltransferase 2	HGNC:94	6q25.3	hDG31O18	human	NM_005891	56.1355	56.9688	68.2475	-0.754155	-0.674491	-0.562851	60.4506	-0.791924	0.272504	0.408787	0	0	0	0	0.00326797
91452	ACBD5	ACBD5	acyl-CoA binding domain containing 5	HGNC:23338	10p12.1	hDG30C03	human	NM_145698	71.1325	96.4931	122.257	-0.29509	0.0495949	0.864732	96.6275	0.218215	0.762373	0.608452	0	0	0	0	0.00653595
1636	ACE	ACE	angiotensin I converting enzyme	HGNC:2707	17q23.3	hDG28E07	human	NM_152831	44.2646	65.7268	97.7103	-0.909778	-0.927425	0.809389	69.2339	-0.546675	0.44876	0.498135	0	0	0	0	0.0163399
59272	ACE2	ACE2	angiotensin I converting enzyme 2	HGNC:13557	Xp22	hDG28G07	human	NM_021804	83.6735	119.397	76.4111	0.18823	0.236072	0.0993986	93.1606	0.12141	0.866403	0.632254	0	0	0	0	0.00326797
340485	ASAH3L	ACER2	alkaline ceramidase 2	HGNC:23675	9p21.3	hDG11M22	human	NM_001010887	54.6331	45.6291	59.2519	-0.303891	-0.260803	-0.121896	53.1714	-0.995175	0.167915	0.347669	0	0	0	0	0.00326797
43	ACHE	ACHE	acetylcholinesterase (Cartwright blood group)	HGNC:108	7q22	hDG11I18	human	NM_000665	57.6326	57.5523	60.8373	-0.200124	0.206844	-0.0568848	58.674	-0.841529	0.243595	0.391028	0	0	0	0	0.00653595
1238	CCBP2	ACKR2	atypical chemokine receptor 2	HGNC:1565	3p21.3	hDG08B21	human	NM_001296	68.6908	86.7188	68.9288	-0.816489	-0.289067	-0.631801	74.7794	-0.391832	0.587171	0.551937	0	0	0	0	NA
57007	CMKOR1	ACKR3	atypical chemokine receptor 3	HGNC:23692	2q37.3	hDG08I13	human	NM_020311	117.474	179.219	105.934	0.873288	2.45337	0.665953	134.209	1.26757	0.0790405	0.266972	0	0	0	0	NA
51554	CCRL1	ACKR4	atypical chemokine receptor 4	HGNC:1611	3q22	hDG08K11	human	NM_016557	81.8089	102.719	90.8399	-0.362095	0.1853	0.136606	91.7892	0.0831175	0.908309	0.641679	0	0	0	0	NA
55856	THEM2	ACOT13	acyl-CoA thioesterase 13	HGNC:20999	6p22.1	hDG11L13	human	NM_018473	40.9213	34.6231	62.0263	-0.778259	-0.692477	-0.00812639	45.8569	-1.19941	0.0965316	0.286389	0	0	0	0	0.00326797
51	ACOX1	ACOX1	acyl-CoA oxidase 1	HGNC:119	17q25.1	hDG25K03	human	NM_004035	117.941	57.418	91.0035	-0.303211	-1.28903	-0.303521	88.7875	-0.000694875	0.999232	0.664391	0	0	0	0	NA
52	ACP1	ACP1	acid phosphatase 1, soluble	HGNC:122	2p25	hDG27L18	human	NM_004300	105.089	174.823	139.425	0.674491	1.01174	0.425022	139.779	1.4231	0.0486352	0.223049	1	0	1	0	0.00326797
53	ACP2	ACP2	acid phosphatase 2, lysosomal	HGNC:123	11p11.2	hDG27H03	human	NM_001610	52.7246	144.88	99.5791	-1.05497	0.48603	-0.23099	99.0612	0.286168	0.691729	0.586672	0	0	0	0	0.00326797
54	ACP5	ACP5	acid phosphatase 5, tartrate resistant	HGNC:124	19p13.2	hDG27P03	human	NM_001611	67.1249	84.428	107.997	-0.57937	-0.575301	-0.092396	86.5167	-0.0641023	0.929223	0.646557	0	0	0	0	0.00653595
51205	ACP6	ACP6	acid phosphatase 6, lysophosphatidic	HGNC:29609	1q21	hDG27N03	human	NM_016361	93.569	143.185	117.538	0.294009	0.456273	0.0646772	118.097	0.817695	0.257211	0.399205	0	0	0	0	0.0130719
390928	FLJ16165	ACP7	acid phosphatase 7, tartrate resistant (putative)	HGNC:33781	19q13.2	hDG27O14	human	NM_001004318	86.7616	74.8234	105.752	0.0691785	-0.743924	-0.129354	89.1125	0.00837778	0.990738	0.662861	0	0	0	0	NA
55	ACPP	ACPP	acid phosphatase, prostate	HGNC:125	3q22.1	hDG27H16	human	NM_001099	186.516	79.9082	106.875	3.36381	-0.654653	-0.110875	124.433	0.994604	0.168189	0.347671	0	0	0	0	0.00326797
93650	ACPT	ACPT	acid phosphatase, testicular	HGNC:14376	19q13.33	hDG27J03	human	NM_033068	106.398	10.4167	39.53	0.717727	-1.87469	-1.21963	52.115	-1.02467	0.155688	0.341042	0	0	0	0	0.00326797
49	ACR	ACR	acrosin	HGNC:126	22q13.33	hDG28I07	human	NM_001097	110.134	116.286	127.103	0.925464	0.168623	1.78918	117.841	0.810539	0.261392	0.4011	0	0	0	0	0.00326797
2180	ACSL1	ACSL1	acyl-CoA synthetase long-chain family member 1	HGNC:3569	4q35.1	hDG22G13	human	NM_001995	87.0169	245.665	61.4796	-0.421557	1.28474	-1.34898	131.387	1.18878	0.0996005	0.290057	0	0	0	0	0.00326797
116285	ACSM1	ACSM1	acyl-CoA synthetase medium-chain family member 1	HGNC:18049	16p12.3	hDG22I13	human	NM_052956	96.0901	178.7	75.3625	-0.101174	0.385423	-0.674491	116.717	0.779167	0.280337	0.414828	0	0	0	0	0.00653595
81	ACTN4	ACTN4	actinin alpha 4	HGNC:166	19q13	hDG02I03	human	NM_004924	37.0158	54.1002	59.2665	-0.816489	-0.100172	0.210167	50.1275	-1.08017	0.134473	0.325842	0	0	0	0	0.00980392
10121	ACTR1A	ACTR1A	ARP1 actin-related protein 1 homolog A, centractin alpha	HGNC:167	10q24	hDG02K03	human	NM_005736	51.7073	73.6934	49.4461	-0.248497	0.647778	-0.190617	58.2823	-0.852468	0.237523	0.387165	0	0	0	0	NA
64431	ACTR6	ACTR6	ARP6 actin-related protein 6 homolog	HGNC:24025	12q23.1	hDG02M03	human	NM_022496	22.7834	39.4052	30.524	-1.36673	-0.661135	-0.96286	30.9042	-1.61692	0.0250677	0.173606	-1	0	-1	0	0.00980392
140625	ACTRT2	ACTRT2	actin related protein T2	HGNC:24026	1p36.3	hDG02O03	human	NM_080431	54.9211	41.8544	62.3802	-0.124248	-0.567641	0.337245	53.0519	-0.998511	0.166495	0.346968	0	0	0	0	0.00980392
90	ACVR1	ACVR1	activin A receptor type 1	HGNC:171	2q23-q24	K01M10	human	NM_001105	125.768	52.7536	135.966	0.294496	-1.22051	0.655755	104.829	0.447228	0.535475	0.532437	0	0	0	0	0.0163399
91	ACVR1B	ACVR1B	activin A receptor type 1B	HGNC:172	12q13	K01F09	human	NM_004302	206.588	162.512	191.306	2.35597	1.82005	2.04221	186.802	2.73608	0.000150306	0.0134048	1	1	1	1	0.0130719
130399	ACVR1C	ACVR1C	activin A receptor type 1C	HGNC:18123	2q24.2	K01B20	human	NM_145259	110.871	108.792	79.8785	-0.0854988	0.331892	-0.749434	99.8471	0.308112	0.669428	0.580497	0	0	0	0	0.00980392
92	ACVR2A	ACVR2A	activin A receptor type 2A	HGNC:173	2q22.2-q23.3	K01A16	human	NM_001616	103.049	64.3478	125.123	-0.284996	-0.899321	0.384085	97.5066	0.242761	0.736589	0.601406	0	0	0	0	0.00653595
93	ACVR2B	ACVR2B	activin A receptor type 2B	HGNC:174	3p22	K02P04	human	NM_001106	58.5983	139.802	72.7057	-0.337245	1.15226	0.0331717	90.3685	0.0434502	0.951993	0.65107	0	0	0	0	NA
94	ACVRL1	ACVRL1	activin A receptor like type 1	HGNC:175	12q13.13	K01G03	human	NM_000020	122.789	95.6522	115.027	0.218497	-0.0321186	0.131151	111.156	0.623878	0.387331	0.46998	0	0	0	0	0.00980392
97	ACYP1	ACYP1	acylphosphatase 1	HGNC:179	14q24.3	hDG27C04	human	NM_001107	96.449	220.586	119.221	0.389129	1.81517	0.092396	145.419	1.58057	0.0285406	0.184456	1	0	1	0	0.00326797
98	ACYP2	ACYP2	acylphosphatase 2	HGNC:180	2p16.2	hDG27E04	human	NM_138448	56.3901	127.366	153.455	-0.93391	0.178542	0.656012	112.404	0.658717	0.361406	0.457985	0	0	0	0	NA
100	ADA	ADA	adenosine deaminase	HGNC:186	20q13.12	hDG11K18	human	NM_000022	55.0616	52.0493	94.5256	-0.289067	-0.00899321	1.3246	67.2122	-0.603126	0.403321	0.476738	0	0	0	0	0.00326797
161823	ADAL	ADAL	adenosine deaminase like	HGNC:31853	15q15.3	hDG11M18	human	NM_001012969	43.4922	49.7564	74.7089	-0.689315	-0.0989253	0.511963	55.9859	-0.916589	0.20407	0.371487	0	0	0	0	0.00980392
102	ADAM10	ADAM10	ADAM metallopeptidase domain 10	HGNC:188	15q2	hDG28C03	human	NM_001110	53.8353	87.5061	121.14	-0.643119	-0.455281	1.59038	87.4936	-0.0368233	0.959307	0.653758	0	0	0	0	0.00653595
4185	ADAM11	ADAM11	ADAM metallopeptidase domain 11	HGNC:189	17q21.3	hDG28K07	human	NM_002390	81.9845	114.73	71.7252	0.141172	0.134898	-0.0567992	89.48	0.0186397	0.979395	0.659596	0	0	0	0	0.0130719
8038	ADAM12	ADAM12	ADAM metallopeptidase domain 12	HGNC:190	10q26	hDG28H20	human	NM_003474	57.2132	22.946	52.1299	-0.549004	-1.85485	-0.70999	44.0964	-1.24857	0.083629	0.272913	0	0	0	0	0.0196078
8751	ADAM15	ADAM15	ADAM metallopeptidase domain 15	HGNC:193	1q21.3	hDG28J20	human	NM_003815	13.8635	44.7253	67.0394	-1.75681	-1.38271	-0.212997	41.8761	-1.31056	0.0693879	0.253334	0	0	0	0	0.00980392
6868	ADAM17	ADAM17	ADAM metallopeptidase domain 17	HGNC:195	2p25	hDG28M07	human	NM_003183	65.658	114.73	62.7796	-0.313717	0.134898	-0.354995	81.0559	-0.216579	0.764104	0.608452	0	0	0	0	0.0130719
8749	ADAM18	ADAM18	ADAM metallopeptidase domain 18	HGNC:196	8p11.22	hDG28A09	human	NM_014237	115.201	106.174	98.1363	1.06664	-0.0505868	0.823589	106.504	0.493977	0.493675	0.516642	0	0	0	0	0.00653595
8728	ADAM19	ADAM19	ADAM metallopeptidase domain 19	HGNC:197	5q33.3	hDG28E03	human	NM_033274	37.5088	90.6174	158.2	-1.09801	-0.387832	2.82576	95.4421	0.185116	0.797577	0.61544	0	0	0	0	0.0130719
2515	ADAM2	ADAM2	ADAM metallopeptidase domain 2	HGNC:198	8p11.2	hDG28C09	human	NM_001464	62.8431	68.0603	105.804	-0.392146	-0.876838	1.07919	78.9025	-0.276707	0.701412	0.590135	0	0	0	0	0.0228758
8748	ADAM20	ADAM20	ADAM metallopeptidase domain 20	HGNC:199	14q24.2	hDG28E09	human	NM_003814	136.594	117.842	47.4441	1.6627	0.202347	-0.866188	100.627	0.329875	0.647623	0.574149	0	0	0	0	0.00980392
8747	ADAM21	ADAM21	ADAM metallopeptidase domain 21	HGNC:200	14q24.2	hDG28G09	human	NM_003813	40.8867	94.5066	60.6496	-1.00389	-0.303521	-0.425994	65.3476	-0.655188	0.363964	0.460168	0	0	0	0	0.00980392
53616	ADAM22	ADAM22	ADAM metallopeptidase domain 22	HGNC:201	7q21	hDG28I09	human	NM_016351	33.0049	56.3928	44.4622	-1.22349	-1.12977	-0.965587	44.62	-1.23395	0.0873102	0.278522	0	0	0	0	0.00980392
8745	ADAM23	ADAM23	ADAM metallopeptidase domain 23	HGNC:202	2q33	hDG28G03	human	NM_003812	79.1696	187.069	60.6496	0.0627433	1.70309	-0.425994	108.963	0.562636	0.43567	0.493805	0	0	0	0	0.00326797
10863	ADAM28	ADAM28	ADAM metallopeptidase domain 28	HGNC:206	8p21.2	hDG28K09	human	NM_014265	37.5088	145.066	50.426	-1.09801	0.792527	-0.766789	77.6668	-0.31121	0.666328	0.579593	0	0	0	0	0.0130719
11086	ADAM29	ADAM29	ADAM metallopeptidase domain 29	HGNC:207	4q34.1	hDG28M09	human	NM_014269	66.221	151.288	65.3355	-0.298031	0.927425	-0.269796	94.2816	0.15271	0.832426	0.623826	0	0	0	0	0.0228758
11085	ADAM30	ADAM30	ADAM metallopeptidase domain 30	HGNC:208	1p12	hDG28O09	human	NM_021794	145.602	130.287	100.692	1.91367	0.472144	0.908788	125.527	1.02515	0.155477	0.341042	0	0	0	0	0.00326797
203102	ADAM32	ADAM32	ADAM metallopeptidase domain 32	HGNC:15479	8p11.22	hDG28N20	human	NM_145004	76.9177	43.1697	79.393	0	-1.41643	0.198797	66.4934	-0.623194	0.387854	0.470245	0	0	0	0	0.0130719
80332	ADAM33	ADAM33	ADAM metallopeptidase domain 33	HGNC:15478	20p13	hDG28P20	human	NM_025220	145.602	75.8386	131.789	1.91367	-0.708215	1.94537	117.743	0.807808	0.263017	0.402493	0	0	0	0	0.0163399
8756	ADAM7	ADAM7	ADAM metallopeptidase domain 7	HGNC:214	8p21.2	hDG28A11	human	NM_003817	150.669	180.846	186.741	2.05484	1.56819	3.77715	172.752	2.34377	0.0011654	0.0408911	1	0	1	1	0.0163399
101	ADAM8	ADAM8	ADAM metallopeptidase domain 8	HGNC:215	10q26.3	hDG28C11	human	NM_001109	40.3237	143.51	89.6166	-1.01958	0.758802	0.539593	91.1501	0.0652729	0.927938	0.646182	0	0	0	0	0.00653595
8754	ADAM9	ADAM9	ADAM metallopeptidase domain 9	HGNC:216	8p11.23	hDG28E11	human	NM_001005845	42.0127	183.957	50.852	-0.972522	1.63564	-0.75259	92.274	0.0966534	0.893475	0.638998	0	0	0	0	0.00326797
27299	ADAMDEC1	ADAMDEC1	ADAM like decysin 1	HGNC:16299	8p12	hDG28G11	human	NM_014479	81.4215	106.952	57.6677	0.125487	-0.0337245	-0.525393	82.0137	-0.189835	0.792519	0.61366	0	0	0	0	0.00326797
9510	ADAMTS1	ADAMTS1	ADAM metallopeptidase with thrombospondin type 1 motif 1	HGNC:217	21q21.3	hDG28I11	human	NM_006988	53.8353	85.9504	43.1842	-0.643119	-0.489006	-1.00819	60.99	-0.776862	0.281733	0.415286	0	0	0	0	0.00653595
81794	ADAMTS10	ADAMTS10	ADAM metallopeptidase with thrombospondin type 1 motif 10	HGNC:13201	19p13.2	hDG28K11	human	NM_030957	66.221	90.6174	110.064	-0.298031	-0.387832	1.22118	88.9674	0.00432797	0.995215	0.663571	0	0	0	0	0.0130719
81792	ADAMTS12	ADAMTS12	ADAM metallopeptidase with thrombospondin type 1 motif 12	HGNC:14605	5q35	hDG28M11	human	NM_030955	89.8663	194.847	49.574	0.360774	1.87171	-0.795189	111.429	0.631505	0.381616	0.46785	0	0	0	0	0.0294118
11093	ADAMTS13	ADAMTS13	ADAM metallopeptidase with thrombospondin type 1 motif 13	HGNC:1366	9q34	hDG28B22	human	NM_139025	76.9177	85.9504	87.0607	0	-0.489006	0.454394	83.3096	-0.153651	0.8314	0.623826	0	0	0	0	0.00653595
140766	ADAMTS14	ADAMTS14	ADAM metallopeptidase with thrombospondin type 1 motif 14	HGNC:14899	10q21	hDG28D22	human	NM_080722	63.4061	79.7278	58.5197	-0.37646	-0.623904	-0.496993	67.2178	-0.602968	0.403439	0.476738	0	0	0	0	0.0163399
170689	ADAMTS15	ADAMTS15	ADAM metallopeptidase with thrombospondin type 1 motif 15	HGNC:16305	11q25	hDG28O11	human	NM_139055	73.5398	60.282	41.4803	-0.094115	-1.04546	-1.06499	58.434	-0.848231	0.239864	0.38859	0	0	0	0	0.00653595
170690	ADAMTS16	ADAMTS16	ADAM metallopeptidase with thrombospondin type 1 motif 16	HGNC:17108	5p15	hDG28A13	human	NM_139056	165.306	125.62	100.266	2.46268	0.37097	0.894588	130.397	1.16114	0.107649	0.299836	0	0	0	0	0.0228758
170691	ADAMTS17	ADAMTS17	ADAM metallopeptidase with thrombospondin type 1 motif 17	HGNC:17109	15q24	hDG28C13	human	NM_139057	154.609	267.963	110.916	2.16464	3.45677	1.24958	177.829	2.48555	0.000575126	0.0264768	1	0	1	1	0.0130719
170692	ADAMTS18	ADAMTS18	ADAM metallopeptidase with thrombospondin type 1 motif 18	HGNC:17110	16q23	hDG28E13	human	NM_199355	96.6221	194.069	91.3206	0.549004	1.85485	0.596392	127.337	1.0757	0.136123	0.327087	0	0	0	0	0.0228758
171019	ADAMTS19	ADAMTS19	ADAM metallopeptidase with thrombospondin type 1 motif 19	HGNC:17111	5q23.3	hDG28G13	human	NM_133638	42.0127	136.509	56.3898	-0.972522	0.607042	-0.567992	78.304	-0.293419	0.684338	0.585093	0	0	0	0	0.0228758
9509	ADAMTS2	ADAMTS2	ADAM metallopeptidase with thrombospondin type 1 motif 2	HGNC:218	5q35.3	hDG28I13	human	NM_014244	154.046	271.074	90.8946	2.14896	3.52421	0.582192	172.005	2.32292	0.00129212	0.0422554	1	0	1	1	0.0130719
80070	ADAMTS20	ADAMTS20	ADAM metallopeptidase with thrombospondin type 1 motif 20	HGNC:17178	12q12	hDG28K13	human	NM_025003	98.311	109.285	78.115	0.596062	0.0168623	0.156198	95.2371	0.179392	0.803691	0.617373	0	0	0	0	0.0457516
9508	ADAMTS3	ADAMTS3	ADAM metallopeptidase with thrombospondin type 1 motif 3	HGNC:219	4q21	hDG28F22	human	NM_014243	183.885	106.174	55.5378	2.98031	-0.0505868	-0.596392	115.199	0.736765	0.307356	0.431669	0	0	0	0	0.0326797
9507	ADAMTS4	ADAMTS4	ADAM metallopeptidase with thrombospondin type 1 motif 4	HGNC:220	1q31-q32	hDG28H22	human	NM_005099	46.5165	78.1721	45.3142	-0.847035	-0.657628	-0.937187	56.6676	-0.897553	0.213623	0.375972	0	0	0	0	0.0163399
11096	ADAMTS5	ADAMTS5	ADAM metallopeptidase with thrombospondin type 1 motif 5	HGNC:221	21q21.3	hDG28O13	human	NM_007038	143.35	123.286	115.176	1.85093	0.320383	1.39158	127.271	1.07384	0.136773	0.328035	0	0	0	0	0.0196078
11174	ADAMTS6	ADAMTS6	ADAM metallopeptidase with thrombospondin type 1 motif 6	HGNC:222	5q13	hDG28A15	human	NM_197941	156.861	198.736	105.378	2.22739	1.95602	1.06499	153.658	1.81064	0.0121209	0.129089	1	0	1	1	0.00653595
11173	ADAMTS7	ADAMTS7	ADAM metallopeptidase with thrombospondin type 1 motif 7	HGNC:223	15q25.1	hDG28C15	human	NM_014272	107.882	112.397	79.819	0.862721	0.0843113	0.212997	100.032	0.313288	0.664213	0.578636	0	0	0	0	0.0294118
11095	ADAMTS8	ADAMTS8	ADAM metallopeptidase with thrombospondin type 1 motif 8	HGNC:224	11q25	hDG28E15	human	NM_007037	43.7016	109.285	69.5953	-0.925464	0.0168623	-0.127798	74.1941	-0.408175	0.571684	0.546577	0	0	0	0	0.0163399
56999	ADAMTS9	ADAMTS9	ADAM metallopeptidase with thrombospondin type 1 motif 9	HGNC:13202	3p14.1	hDG28G15	human	NM_182920	148.98	145.066	155.218	2.00779	0.792527	2.72636	149.755	1.70163	0.0183876	0.152669	1	0	1	1	0.0294118
57188	ADAMTSL3	ADAMTSL3	ADAMTS like 3	HGNC:14633	15q25.2	hDG02A10	human	NM_207517	141.693	83.1402	68.1287	3.23046	1.0084	0.571851	97.654	0.246875	0.732298	0.600424	0	0	0	0	0.0228758
57143	ADCK1	ADCK1	aarF domain containing kinase 1	HGNC:19038	14q24.3	K02J05	human	NM_020421	67.8468	140.935	161.721	-0.0374717	1.18036	2.62056	123.501	0.96858	0.179593	0.356204	0	0	0	0	0.00326797
90956	ADCK2	ADCK2	aarF domain containing kinase 2	HGNC:19039	7q34	K02J16	human	NM_052853	110.621	109.207	154.874	1.34898	0.393453	2.42153	124.901	1.00766	0.162649	0.345371	0	0	0	0	0.00653595
203054	ADCK5	ADCK5	aarF domain containing kinase 5	HGNC:21738	8q24.3	K02N18	human	NM_174922	27.3844	19.6884	22.4917	-1.34898	-1.82675	-1.42638	23.1882	-1.83237	0.0111222	0.125354	-1	0	-1	0	NA
107	ADCY1	ADCY1	adenylate cyclase 1	HGNC:232	7p12.3	hDG22N09	human	NM_021116	29.2344	89.0135	52.8942	-2.46189	-0.819024	-1.7661	57.0474	-0.886949	0.219088	0.379093	0	0	0	0	0.0392157
108	ADCY2	ADCY2	adenylate cyclase 2	HGNC:233	5p15.3	hDG22G04	human	NM_020546	84.6292	158.371	98.5615	-0.505868	0.112415	0.452619	113.854	0.699209	0.332638	0.444536	0	0	0	0	0.0490196
109	ADCY3	ADCY3	adenylate cyclase 3	HGNC:234	2p23.3	hDG22I04	human	NM_004036	96.5677	177.504	85.592	-0.0843113	0.369364	-0.177498	119.888	0.867692	0.229276	0.383098	0	0	0	0	0.0196078
196883	ADCY4	ADCY4	adenylate cyclase 4	HGNC:235	14q11.2	hDG22K04	human	NM_139247	101.582	132.063	78.4679	0.0927425	-0.24089	-0.523618	104.037	0.425117	0.555826	0.542387	0	0	0	0	0.0196078
111	ADCY5	ADCY5	adenylate cyclase 5	HGNC:236	3q21.1	hDG22M04	human	NM_183357	118.057	194.245	110.252	0.674491	0.594194	1.02061	140.851	1.45304	0.0440922	0.216799	1	0	1	0	0.0130719
112	ADCY6	ADCY6	adenylate cyclase 6	HGNC:237	12q13.12	hDG22O04	human	NM_020983	85.1067	139.238	121.578	-0.489006	-0.144534	1.57085	115.307	0.739797	0.30533	0.43083	0	0	0	0	0.0130719
113	ADCY7	ADCY7	adenylate cyclase 7	HGNC:238	16q12.1	hDG22A06	human	NM_001114	124.026	81.8386	78.2852	0.885269	-0.91538	-0.532493	94.7167	0.164859	0.819309	0.620744	0	0	0	0	0.00653595
114	ADCY8	ADCY8	adenylate cyclase 8	HGNC:239	8q24	hDG22P09	human	NM_001115	121.877	169.133	80.6599	0.809389	0.256949	-0.417119	123.89	0.979444	0.174757	0.352366	0	0	0	0	0.0392157
115	ADCY9	ADCY9	adenylate cyclase 9	HGNC:240	16p13.3	hDG22B11	human	NM_001116	107.551	85.426	79.3812	0.303521	-0.867202	-0.479243	90.7861	0.0551096	0.939131	0.648086	0	0	0	0	0.0130719
117	ADCYAP1R1	ADCYAP1R1	ADCYAP receptor type I	HGNC:242	7p14.3	hDG08O03	human	NM_001118	104.356	155.219	124.924	0.418894	1.74182	1.33191	128.166	1.09884	0.127873	0.320029	0	0	0	0	0.00980392
118	ADD1	ADD1	adducin 1	HGNC:243	4p16.3	hDG02A05	human	NM_176801	88.8953	47.1026	113.638	1.18923	-0.367297	2.42914	83.2118	-0.15638	0.828456	0.623784	0	0	0	0	0.0130719
84435	GPR123	ADGRA1	adhesion G protein-coupled receptor A1	HGNC:13838	10q26	hDG08M06	human	NM_032422	58.4422	59.2188	89.8661	-1.17148	-1.10439	0.102454	69.1757	-0.5483	0.447408	0.497442	0	0	0	0	NA
25960	GPR124	ADGRA2	adhesion G protein-coupled receptor A2	HGNC:17849	8p11.22	hDG08B12	human	NM_032777	132.232	119.219	80.6147	1.38448	0.674491	-0.221984	110.688	0.610824	0.397347	0.474405	0	0	0	0	NA
166647	GPR125	ADGRA3	adhesion G protein-coupled receptor A3	HGNC:13839	4p15.31	hDG08O06	human	NM_145290	111.735	83.2188	86.4577	0.674491	-0.392835	-0.0170757	93.8037	0.139366	0.846871	0.626979	0	0	0	0	NA
166647	GPR125	ADGRA3	adhesion G protein-coupled receptor A3	HGNC:13839	4p15.31	K01D20	human	NM_145290	161.15	81.3527	109.792	1.19698	-0.428248	0	117.432	0.799107	0.268196	0.406205	0	0	0	0	NA
575	BAI1	ADGRB1	adhesion G protein-coupled receptor B1	HGNC:943	8q24.3	hDG08M07	human	NM_001702	78.9393	61.2188	73.311	-0.461494	-1.04509	-0.47812	71.1563	-0.492996	0.494533	0.516642	0	0	0	0	NA
576	BAI2	ADGRB2	adhesion G protein-coupled receptor B2	HGNC:944	1p35	hDG08A09	human	NM_001703	140.43	176.219	88.4054	1.66848	2.36442	0.0512271	135.018	1.29016	0.0738454	0.259245	0	0	0	0	NA
577	BAI3	ADGRB3	adhesion G protein-coupled receptor B3	HGNC:945	6q12	hDG08N19	human	NM_001704	70.3305	68.7188	75.7456	-0.75969	-0.82273	-0.392741	71.5983	-0.480656	0.505399	0.521193	0	0	0	0	NA
283383	GPR133	ADGRD1	adhesion G protein-coupled receptor D1	HGNC:19893	12q24.33	hDG08C08	human	NM_198827	89.5977	92.2188	55.7821	-0.0922987	-0.126004	-1.09285	79.1995	-0.268413	0.70995	0.592695	0	0	0	0	NA
347088	GPR144	ADGRD2	adhesion G protein-coupled receptor D2	HGNC:18651	9q34.11	hDG08E08	human	NM_182611	80.579	67.7188	63.0858	-0.404694	-0.852378	-0.83671	70.4612	-0.512406	0.477697	0.510079	0	0	0	0	NA
2015	EMR1	ADGRE1	adhesion G protein-coupled receptor E1	HGNC:3336	19p13.3	hDG08C19	human	NM_001974	76.4796	148.219	108.369	-0.546693	1.53428	0.751331	111.022	0.620151	0.390186	0.471102	0	0	0	0	NA
30817	EMR2	ADGRE2	adhesion G protein-coupled receptor E2	HGNC:3337	19p13.12	hDG08E19	human	NM_013447	52.2931	76.2188	95.7091	-1.38448	-0.600371	0.307363	74.7403	-0.392924	0.586133	0.551937	0	0	0	0	NA
84658	EMR3	ADGRE3	adhesion G protein-coupled receptor E3	HGNC:23647	19p13.12	hDG08G19	human	NM_032571	73.2001	91.7188	121.516	-0.660291	-0.140828	1.21238	95.4781	0.186121	0.796488	0.615213	0	0	0	0	NA
326342	EMR4	ADGRE4P	adhesion G protein-coupled receptor E4, pseudogene	HGNC:19240	19p13.2	hDG08I19	human	XM_940358	87.548	121.719	127.358	-0.163298	0.748611	1.41728	112.208	0.653267	0.365369	0.460458	0	0	0	0	NA
976	CD97	ADGRE5	adhesion G protein-coupled receptor E5	HGNC:1711	19p13.12	hDG08O11	human	NM_001784	60.4919	60.2188	73.311	-1.10048	-1.07474	-0.47812	64.6739	-0.674	0.350346	0.45194	0	0	0	0	NA
266977	GPR110	ADGRF1	adhesion G protein-coupled receptor F1	HGNC:18990	6p21.1	hDG08A06	human	NM_153840	126.083	143.719	122.976	1.17148	1.40087	1.2636	130.926	1.1759	0.103243	0.294461	0	0	0	0	NA
222611	GPR111	ADGRF2	adhesion G protein-coupled receptor F2	HGNC:18991	6p12.3	hDG08C06	human	NM_153839	180.195	72.7188	97.1698	3.04586	-0.704139	0.35859	116.694	0.778526	0.280735	0.415285	0	0	0	0	NA
165082	GPR113	ADGRF3	adhesion G protein-coupled receptor F3	HGNC:18989	2p24.1	hDG08J06	human	NM_153835	78.1194	89.7188	98.1436	-0.489893	-0.200124	0.392741	88.6606	-0.00423937	0.995313	0.663571	0	0	0	0	NA
221393	GPR115	ADGRF4	adhesion G protein-coupled receptor F4	HGNC:19011	6p12.3	hDG08P10	human	NM_153838	76.4796	77.2188	71.8503	-0.546693	-0.570723	-0.529347	75.1829	-0.380566	0.597964	0.555671	0	0	0	0	NA
221395	GPR116	ADGRF5	adhesion G protein-coupled receptor F5	HGNC:19030	6p12.3	hDG08G06	human	NM_015234	109.275	91.2188	68.9288	0.589292	-0.155652	-0.631801	89.8075	0.0277843	0.96929	0.655635	0	0	0	0	NA
9289	GPR56	ADGRG1	adhesion G protein-coupled receptor G1	HGNC:4512	16q21	hDG08O14	human	NM_005682	51.4732	42.7188	107.882	-1.41288	-1.59358	0.734256	67.358	-0.599055	0.40651	0.478236	0	0	0	0	NA
10149	GPR64	ADGRG2	adhesion G protein-coupled receptor G2	HGNC:4516	Xp22.13	hDG08E16	human	NM_005756	65.0013	89.7188	43.1223	-0.944287	-0.200124	-1.53681	65.9475	-0.638439	0.376353	0.466048	0	0	0	0	NA
222487	GPR97	ADGRG3	adhesion G protein-coupled receptor G3	HGNC:13728	16q13	hDG08G18	human	NM_170776	80.1691	82.7188	108.856	-0.418894	-0.407659	0.768407	90.5812	0.0493881	0.94544	0.649132	0	0	0	0	NA
139378	GPR112	ADGRG4	adhesion G protein-coupled receptor G4	HGNC:18992	Xq26.3	hDG08H06	human	NM_153834	91.2375	56.2188	111.777	-0.0354995	-1.19333	0.870861	86.4112	-0.0670483	0.92598	0.645851	0	0	0	0	NA
221188	GPR114	ADGRG5	adhesion G protein-coupled receptor G5	HGNC:19010	16q13	hDG08E06	human	NM_153837	114.604	92.2188	88.8923	0.773889	-0.126004	0.0683029	98.5717	0.272501	0.705736	0.591733	0	0	0	0	NA
57211	GPR126	ADGRG6	adhesion G protein-coupled receptor G6	HGNC:13841	6q24.2	hDG08L06	human	NM_198569	119.523	39.7188	116.159	0.944287	-1.68252	1.02454	91.8006	0.083435	0.907964	0.641679	0	0	0	0	NA
84873	GPR128	ADGRG7	adhesion G protein-coupled receptor G7	HGNC:19241	3q12.3	hDG08N06	human	NM_032787	108.045	50.7188	68.9288	0.546693	-1.35639	-0.631801	75.8975	-0.360611	0.617307	0.563207	0	0	0	0	NA
22859	LPHN1	ADGRL1	adhesion G protein-coupled receptor L1	HGNC:20973	19p13.2	hDG08E22	human	NM_014921	72.3802	92.2188	105.934	-0.688691	-0.126004	0.665953	90.1777	0.0381228	0.957872	0.653159	0	0	0	0	NA
23266	LPHN2	ADGRL2	adhesion G protein-coupled receptor L2	HGNC:18582	1p31.1	hDG08H12	human	NM_012302	125.263	134.719	111.29	1.14308	1.13403	0.853786	123.757	0.975735	0.176377	0.35348	0	0	0	0	NA
23284	LPHN3	ADGRL3	adhesion G protein-coupled receptor L3	HGNC:20974	4q13.1	hDG08G22	human	NM_015236	65.8212	137.719	107.882	-0.915887	1.22298	0.734256	103.807	0.418689	0.561822	0.543353	0	0	0	0	NA
64123	ELTD1	ADGRL4	adhesion G protein-coupled receptor L4	HGNC:20822	1p33-p32	hDG08A19	human	NM_022159	128.542	128.219	86.4577	1.25668	0.941322	-0.0170757	114.406	0.714634	0.322072	0.440434	0	0	0	0	NA
84059	GPR98	ADGRV1	adhesion G protein-coupled receptor V1	HGNC:17416	5q13	hDG12B16	human	NM_032119	72.7631	135.442	77.904	-0.0674491	0.674491	-0.0729179	95.3698	0.183097	0.799726	0.616042	0	0	0	0	NA
124	ADH1A	ADH1A	alcohol dehydrogenase 1A (class I), alpha polypeptide	HGNC:249	4q23	hDG25M03	human	NM_000667	93.0672	123.609	88.2353	-0.761123	0.449661	-0.37097	101.637	0.358096	0.61976	0.564113	0	0	0	0	0.00326797
125	ADH1B	ADH1B	alcohol dehydrogenase 1B (class I), beta polypeptide	HGNC:250	4q23	hDG25O03	human	NM_000668	85.6723	140.157	113.149	-0.897258	0.884332	0.236072	112.993	0.675164	0.349522	0.451887	0	0	0	0	0.00326797
126	ADH1C	ADH1C	alcohol dehydrogenase 1C (class I), gamma polypeptide	HGNC:251	4q23	hDG25A05	human	NM_000669	148.193	100.214	176.817	0.253708	-0.164876	1.7874	141.741	1.47789	0.0405928	0.208703	1	0	1	0	NA
127	ADH4	ADH4	alcohol dehydrogenase 4 (class II), pi polypeptide	HGNC:252	4q23	hDG25L11	human	NM_000670	192.563	105.92	101.384	1.07052	-0.0149887	-0.0505868	133.289	1.24188	0.085314	0.27568	0	0	0	0	0.00980392
128	ADH5	ADH5	alcohol dehydrogenase 5 (class III), chi polypeptide	HGNC:253	4q23	hDG25N11	human	NM_000671	72.8992	106.491	101.384	-1.1324	0	-0.0505868	93.5913	0.133437	0.85331	0.628402	0	0	0	0	0.00653595
130	ADH6	ADH6	alcohol dehydrogenase 6 (class V)	HGNC:255	4q23	hDG25C05	human	NM_000672	165	124.75	133.218	0.563107	0.479638	0.725078	140.989	1.4569	0.0435254	0.216458	1	0	1	0	0.00326797
131	ADH7	ADH7	alcohol dehydrogenase 7 (class IV), mu or sigma polypeptide	HGNC:256	4q23-q24	hDG25E05	human	NM_000673	115.924	91.6548	153.979	-0.340339	-0.389706	1.23095	120.519	0.885329	0.219932	0.379093	0	0	0	0	0.00326797
137872	ADHFE1	ADHFE1	alcohol dehydrogenase, iron containing 1	HGNC:16354	8q12.3	hDG25G05	human	NM_144650	141.471	117.903	109.689	0.129948	0.299774	0.15176	123.021	0.95517	0.18567	0.360423	0	0	0	0	0.00653595
51094	ADIPOR1	ADIPOR1	adiponectin receptor 1	HGNC:24040	1q32.1	hDG05L21	human	NM_015999	121.408	89.1646	59.4757	0.835084	-0.121896	-0.353305	90.0162	0.033611	0.962854	0.654522	0	0	0	0	0.00653595
79602	ADIPOR2	ADIPOR2	adiponectin receptor 2	HGNC:24041	12p13	hDG06J15	human	NM_024551	61.1649	89.0196	38.2542	0	0.630342	-0.269796	62.8129	-0.725963	0.314461	0.435191	0	0	0	0	0.00980392
132	ADK	ADK	adenosine kinase	HGNC:257	10q22.2	K02G11	human	NM_006721	167.269	96.7422	101.617	3.1851	0.0843113	0.873521	121.876	0.923204	0.200838	0.369055	0	0	0	0	0.00326797
133	ADM	ADM	adrenomedullin	HGNC:259	11p15.4	hDG09D20	human	NM_001124	52.8402	39.925	37.6268	-0.674491	-1.05065	-1.07615	43.464	-1.26623	0.0793477	0.267133	0	0	0	0	NA
23394	ADNP	ADNP	activity dependent neuroprotector homeobox	HGNC:15766	20q13.13	hDG18H19	human	NM_015339	19.6355	53.0506	65.0368	-1.822	0.359144	0.791794	45.9076	-1.19799	0.0969287	0.286861	0	0	0	0	0.0130719
134	ADORA1	ADORA1	adenosine A1 receptor	HGNC:262	1q32.1	hDG08A05	human	NM_000674	100.256	168.219	120.055	0.276896	2.12724	1.16115	129.51	1.13636	0.115369	0.306053	0	0	0	0	0.0130719
135	ADORA2A	ADORA2A	adenosine A2a receptor	HGNC:263	22q11.23	hDG08C05	human	NM_000675	111.735	164.719	98.1436	0.674491	2.02347	0.392741	124.866	1.00668	0.163064	0.345422	0	0	0	0	0.00326797
136	ADORA2B	ADORA2B	adenosine A2b receptor	HGNC:264	17p12	hDG08E05	human	NM_000676	71.9703	115.719	35.3317	-0.70289	0.570723	-1.81003	74.3402	-0.404094	0.57554	0.548245	0	0	0	0	NA
140	ADORA3	ADORA3	adenosine A3 receptor	HGNC:268	1p13.2	hDG06M22	human	NM_000677	95.1154	127.104	42.4722	0.736257	1.45445	-0.148388	88.2305	-0.0162484	0.982038	0.660513	0	0	0	0	0.00653595
140	ADORA3	ADORA3	adenosine A3 receptor	HGNC:268	1p13.2	hDG06O22	human	NM_020683	139.775	110.555	133.861	1.70476	1.09635	2.48213	128.064	1.09598	0.128864	0.320928	0	0	0	0	0.00653595
148	ADRA1A	ADRA1A	adrenoceptor alpha 1A	HGNC:277	8p21.2	hDG08G05	human	NM_033303	111.735	135.719	96.196	0.674491	1.16368	0.324439	114.55	0.718642	0.319363	0.438572	0	0	0	0	0.0130719
147	ADRA1B	ADRA1B	adrenoceptor alpha 1B	HGNC:278	5q33.3	hDG08I05	human	NM_000679	93.6972	144.219	99.6044	0.0496993	1.41569	0.443969	112.507	0.661597	0.35929	0.456624	0	0	0	0	0.00326797
146	ADRA1D	ADRA1D	adrenoceptor alpha 1D	HGNC:280	20p13	hDG08H19	human	NM_000678	106.815	77.2188	163.39	0.504093	-0.570723	2.68089	115.808	0.753776	0.296295	0.42441	0	0	0	0	NA
150	ADRA2A	ADRA2A	adrenoceptor alpha 2A	HGNC:281	10q25.2	hDG08K05	human	NM_000681	77.7095	153.719	119.568	-0.504093	1.69734	1.14407	116.999	0.787022	0.275499	0.411875	0	0	0	0	NA
151	ADRA2B	ADRA2B	adrenoceptor alpha 2B	HGNC:282	2q11.2	hDG08M05	human	NM_000682	74.4299	72.2188	68.9288	-0.617692	-0.718963	-0.631801	71.8592	-0.473372	0.511872	0.524013	0	0	0	0	0.00326797
152	ADRA2C	ADRA2C	adrenoceptor alpha 2C	HGNC:283	4p16.3	hDG08J19	human	NM_000683	121.983	95.7188	133.201	1.02949	-0.022236	1.62219	116.968	0.786158	0.276014	0.412113	0	0	0	0	0.00326797
153	ADRB1	ADRB1	adrenoceptor beta 1	HGNC:285	10q25.3	hDG08O05	human	NM_000684	148.219	134.719	89.3792	1.93827	1.13403	0.0853786	124.106	0.985466	0.172111	0.350228	0	0	0	0	0.00326797
154	ADRB2	ADRB2	adrenoceptor beta 2	HGNC:286	5q31-q32	hDG08A07	human	NM_000024	92.0574	103.219	159.495	-0.0070999	0.200124	2.54428	118.257	0.822156	0.254632	0.397732	0	0	0	0	NA
155	ADRB3	ADRB3	adrenoceptor beta 3	HGNC:288	8p11.23	hDG08B10	human	NM_000025	125.673	126.219	83.0493	1.15728	0.882026	-0.136606	111.647	0.637587	0.376991	0.46655	0	0	0	0	0.00653595
158	ADSL	ADSL	adenylosuccinate lyase	HGNC:291	22q13.1	hDG22C06	human	NM_000026	115.669	114.126	82.1212	0.590179	-0.481779	-0.34612	103.972	0.423289	0.557523	0.542706	0	0	0	0	0.0130719
165	AEBP1	AEBP1	AE binding protein 1	HGNC:303	7p	hDG28I15	human	NM_001129	98.311	145.066	70.0213	0.596062	0.792527	-0.113598	104.466	0.437082	0.544767	0.537537	0	0	0	0	0.00980392
172	AFG3L1&AMP;AEBP1	AFG3L1P	AFG3 like matrix AAA peptidase subunit 1, pseudogene	HGNC:314	16q24.3	hDG28K15	human	NM_001132	41.4497	59.5041	54.6858	-0.988207	-1.06232	-0.624791	51.8799	-1.03124	0.153033	0.340313	0	0	0	0	NA
10939	AFG3L2	AFG3L2	AFG3 like matrix AAA peptidase subunit 2	HGNC:315	18p11.21	hDG28J22	human	NM_006796	60.5911	61.8376	171.406	-0.454889	-1.01174	3.26596	97.9448	0.254997	0.723862	0.59778	0	0	0	0	NA
173	AFM	AFM	afamin	HGNC:316	4q13.3	hDG30E17	human	NM_001133	71.1325	58.0659	96.3832	-0.29509	-1.07125	0.0605312	75.1939	-0.380259	0.598263	0.555671	0	0	0	0	0.0130719
175	AGA	AGA	aspartylglucosaminidase	HGNC:318	4q34.3	hDG11O18	human	NM_000027	104.767	56.6351	93.733	1.43051	0.170871	1.2921	85.045	-0.105194	0.884111	0.637542	0	0	0	0	NA
79841	AGBL2	AGBL2	ATP/GTP binding protein like 2	HGNC:26296	11p11.2	hDG04J19	human	NM_024783	98.4512	19.7676	51.1421	0.367904	-1.5531	-0.70221	56.4536	-0.903528	0.210604	0.374978	0	0	0	0	0.0130719
340351	AGBL3	AGBL3	ATP/GTP binding protein like 3	HGNC:27981	7q33	hDG04H21	human	NM_178563	93.064	64.0859	76.8855	0.265708	0.266246	0.332626	78.0118	-0.301577	0.676036	0.583473	0	0	0	0	NA
84871	AGBL4	AGBL4	ATP/GTP binding protein like 4	HGNC:25892	1p33	hDG04F09	human	NM_032785	16.5657	89.596	84.7005	-1.18547	1.31348	0.646772	63.6207	-0.703407	0.329744	0.443761	0	0	0	0	NA
60509	FLJ21839	AGBL5	ATP/GTP binding protein like 5	HGNC:26147	2p23.3	hDG04J09	human	NM_021831	198.653	84.4075	74.8168	2.26874	1.10048	0.249469	119.293	0.85107	0.238344	0.387608	0	0	0	0	0.0228758
177	AGER	AGER	advanced glycosylation end-product specific receptor	HGNC:320	6p21.3	hDG05I04	human	NM_001136	124.96	75.1835	28.1428	0.947499	-0.528216	-1.34898	76.0955	-0.355083	0.622724	0.565443	0	0	0	0	0.00653595
55750	MULK	AGK	acylglycerol kinase	HGNC:21869	7q34	K03I05	human	NM_018238	243.922	80.2561	161.852	2.43475	-0.41056	1.2914	162.01	2.04384	0.00463546	0.0831278	1	0	1	1	0.00326797
79814	AGMAT	AGMAT	agmatinase	HGNC:18407	1p36.13	hDG11F15	human	NM_024758	92.3407	34.6231	86.9953	1.00062	-0.692477	1.0158	71.3197	-0.488435	0.498544	0.518371	0	0	0	0	0.00326797
27161	EIF2C2	AGO2	argonaute 2, RISC catalytic component	HGNC:3263	8q24.3	hDG23I06	human	NM_012154	110.169	104.34	184.444	-0.272522	-0.396759	1.89293	132.985	1.23338	0.0874699	0.278794	0	0	0	0	NA
56894	AGPAT3	AGPAT3	1-acylglycerol-3-phosphate O-acyltransferase 3	HGNC:326	21q22.3	hDG31A20	human	NM_020132	65.5375	42.9551	127.119	-0.573583	-0.889953	0.693097	78.5372	-0.286906	0.690974	0.586672	0	0	0	0	0.00326797
55326	AGPAT5	AGPAT5	1-acylglycerol-3-phosphate O-acyltransferase 5	HGNC:20886	8p23.1	hDG31K03	human	NM_018361	107.57	147.144	121.45	0.233682	0.711962	0.572154	125.388	1.02127	0.157046	0.341412	0	0	0	0	NA
183	AGT	AGT	angiotensinogen	HGNC:333	1q42.2	hDG04M10	human	NM_000029	26.2626	39.0082	69.0705	-1.00152	-0.76324	0.0184792	44.7805	-1.22947	0.0884676	0.279699	0	0	0	0	0.00653595
23287	AGTPBP1	AGTPBP1	ATP/GTP binding protein 1	HGNC:17258	9q21.33	hDG04H09	human	NM_015239	61.8182	46.3586	61.7153	-0.327026	-0.461494	-0.277188	56.6307	-0.898584	0.213095	0.375755	0	0	0	0	0.0196078
185	AGTR1	AGTR1	angiotensin II receptor type 1	HGNC:336	3q24	hDG08C07	human	NM_000685	81.3989	62.2188	52.8606	-0.376295	-1.01544	-1.1953	65.4928	-0.651135	0.366932	0.46083	0	0	0	0	0.0261438
186	AGTR2	AGTR2	angiotensin II receptor type 2	HGNC:338	Xq22-q23	hDG08E07	human	NM_000686	77.2995	100.219	72.8241	-0.518293	0.11118	-0.495196	83.4475	-0.149802	0.835563	0.624187	0	0	0	0	0.00653595
189	AGXT	AGXT	alanine-glyoxylate aminotransferase	HGNC:341	2q37.3	hDG31A05	human	NM_000030	48.9457	32.5971	63.0144	-0.89224	-1.04921	-0.674491	48.1858	-1.13438	0.115995	0.30661	0	0	0	0	NA
64902	AGXT2	AGXT2	alanine--glyoxylate aminotransferase 2	HGNC:14412	5p13	hDG31C05	human	NM_031900	96.5088	62.4524	76.9692	0.0212438	-0.590179	-0.376784	78.6435	-0.283939	0.693996	0.587842	0	0	0	0	0.00653595
191	AHCY	AHCY	adenosylhomocysteinase	HGNC:343	20q11.22	hDG01A05	human	NM_000687	56.6224	90.9837	53.798	-0.634554	1.12999	-0.297446	67.1347	-0.605289	0.401635	0.476325	0	0	0	0	0.00326797
10768	AHCYL1	AHCYL1	adenosylhomocysteinase like 1	HGNC:344	1p13	hDG01C05	human	NM_006621	61.714	71.1154	36.349	-0.377182	0.122635	-1.261	56.3928	-0.905226	0.209735	0.374673	0	0	0	0	0.00326797
196	AHR	AHR	aryl hydrocarbon receptor	HGNC:348	7p15	hDG06J16	human	NM_001621	24.2523	16.4778	41.0662	-0.800495	-0.939382	-0.188857	27.2654	-1.71853	0.0172606	0.151146	-1	0	-1	0	0.00980392
57379	AICDA	AICDA	activation induced cytidine deaminase	HGNC:13203	12p13	hDG11A20	human	NM_020661	125.763	86.4431	94.922	2.15689	1.33999	1.34086	102.376	0.378728	0.599737	0.556706	0	0	0	0	0.00980392
199	AIF1	AIF1	allograft inflammatory factor 1	HGNC:352	6p21.3	hDG04F07	human	NM_001623	23.0303	46.5748	81.7124	-1.06283	-0.452619	0.526657	50.4392	-1.07146	0.137648	0.328705	0	0	0	0	NA
83543	C9ORF58	AIF1L	allograft inflammatory factor 1 like	HGNC:28904	9q34.13-q34.3	hDG04B21	human	NM_001002260	20.8754	77.9219	73.4377	-1.10371	0.834239	0.194032	57.4117	-0.876777	0.22442	0.381196	0	0	0	0	0.00326797
9131	PDCD8	AIFM1	apoptosis inducing factor, mitochondria associated 1	HGNC:8768	Xq26.1	hDG01M15	human	NM_004208	72.0729	49.5195	32.8592	0.146435	-0.972318	-1.45372	51.4838	-1.04229	0.14868	0.337069	0	0	0	0	0.00326797
84883	AMID	AIFM2	apoptosis inducing factor, mitochondria associated 2	HGNC:21411	10q22.2	hDG25O11	human	NM_032797	145.504	155.563	34.9481	0.204204	1.28903	-1.66936	112.005	0.647594	0.369593	0.462136	0	0	0	0	0.00326797
150209	AIFL	AIFM3	apoptosis inducing factor, mitochondria associated 3	HGNC:26398	22q11.21	hDG25H22	human	NM_144704	175.756	169.258	186.505	0.761123	1.64876	2.02347	177.173	2.46722	0.000630285	0.0279755	1	0	1	1	0.00326797
9049	AIP	AIP	aryl hydrocarbon receptor interacting protein	HGNC:358	11q13.3	hDG03C07	human	NM_003977	39.7251	97.8747	34.8375	-0.655755	2.1467	-0.884474	57.4791	-0.874894	0.225419	0.381384	0	0	0	0	0.00653595
23746	AIPL1	AIPL1	aryl hydrocarbon receptor interacting protein like 1	HGNC:359	17p13.1	hDG03H07	human	NM_014336	38.0546	35.6149	66.9274	-0.730698	-1.08308	0.38815	46.8657	-1.17124	0.104616	0.296283	0	0	0	0	0.00326797
326	AIRE	AIRE	autoimmune regulator	HGNC:360	21q22.3	hDG19F05	human	NM_000383	119.539	87.5208	85.1027	0.60948	-0.124906	-0.36387	97.3875	0.239434	0.740063	0.602117	0	0	0	0	0.00653595
203	AK1	AK1	adenylate kinase 1	HGNC:361	9q34.1	K01G06	human	NM_000476	168.971	123.865	135.592	1.39648	0.749434	0.646387	142.809	1.50771	0.0367048	0.199494	1	0	1	0	NA
204	AK2	AK2	adenylate kinase 2	HGNC:362	1p35.1	K02O17	human	NM_013411	134.899	92.2096	81.0747	2.13589	-0.0281038	0.276431	102.728	0.388545	0.590317	0.552385	0	0	0	0	0.00326797
50808	AK3	AK3	adenylate kinase 3	HGNC:17376	9p24.1	K03K03	human	NM_016282	44.4236	69.4744	58.6549	-0.839001	-0.606064	-0.633363	57.5176	-0.873819	0.225978	0.381699	0	0	0	0	NA
205	AK3L1	AK4	adenylate kinase 4	HGNC:363	1p31.3	K02F20	human	NM_203464	87.5	256.516	161.721	0.599547	4.04694	2.62056	168.579	2.22725	0.0020333	0.0538829	1	0	1	1	0.00326797
387851	AK3L2	AK4P3	adenylate kinase 4 pseudogene 3	HGNC:21596	12p11.22	K03O17	human	NM_001002921	101.566	103.976	115.987	0.098706	0.0195505	0.435951	107.176	0.512759	0.477393	0.510079	0	0	0	0	NA
26289	AK5	AK5	adenylate kinase 5	HGNC:365	1p31	K02M16	human	NM_174858	72.4711	49.1501	44.5554	0.112415	-1.09605	-0.785063	55.3922	-0.933165	0.196008	0.365638	0	0	0	0	0.0163399
122481	AK7	AK7	adenylate kinase 7	HGNC:20091	14q32.31	K02I16	human	NM_152327	90.9682	136.402	74.2273	0.711962	1.06794	0.0774006	100.533	0.327252	0.650228	0.57492	0	0	0	0	0.00653595
221264	C6ORF199	AK9	adenylate kinase 9	HGNC:33814	6q21	K03M08	human	NM_145025	36.4035	19.8787	55.1268	-0.970609	-1.50539	-0.699167	37.1363	-1.44291	0.0455802	0.217027	-1	0	-1	0	NA
8165	AKAP1	AKAP1	A-kinase anchoring protein 1	HGNC:367	17q22	hDG09C03	human	NM_003488	40.484	51.2927	53.854	-1.11438	-0.583694	-0.46987	48.5435	-1.12439	0.119239	0.309022	0	0	0	0	0.0163399
11214	AKAP13	AKAP13	A-kinase anchoring protein 13	HGNC:371	15q25.3	K02I11	human	NM_006738	60.9104	139.802	119.876	-0.262302	1.15226	1.40427	106.863	0.504006	0.484961	0.513571	0	0	0	0	0.0326797
9495	AKAP5	AKAP5	A-kinase anchoring protein 5	HGNC:375	14q23.3	hDG04F19	human	NM_004857	103.838	75.1115	88.8378	0.4701	0.718865	0.813085	89.2626	0.0125687	0.986105	0.662014	0	0	0	0	0.00326797
9472	AKAP6	AKAP6	A-kinase anchoring protein 6	HGNC:376	14q12	hDG30E21	human	NM_004274	118.006	93.0925	155.921	0.569102	-0.0495949	1.91106	122.34	0.936159	0.194585	0.365638	0	0	0	0	0.0424837
10270	AKAP8	AKAP8	A-kinase anchoring protein 8	HGNC:378	19p13.12	hDG01G05	human	NM_005858	60.6606	107.915	70.4884	-0.430432	1.98843	0.624218	79.688	-0.254775	0.724071	0.59778	0	0	0	0	0.00326797
26993	AKAP8L	AKAP8L	A-kinase anchoring protein 8 like	HGNC:29857	19p13.12	hDG01I05	human	NM_014371	76.8133	30.6878	41.5078	0.386057	-1.92712	-0.976126	49.6697	-1.09295	0.129927	0.321633	0	0	0	0	0.00326797
10142	AKAP9	AKAP9	A-kinase anchoring protein 9	HGNC:379	7q21-q22	hDG04G22	human	NM_147185	60.7407	82.4618	72.7482	-0.347465	1.02061	0.166313	71.9836	-0.469898	0.514975	0.525807	0	0	0	0	0.0620915
10327	AKR1A1	AKR1A1	aldo-keto reductase family 1 member A1	HGNC:380	1p33-p32	hDG25I05	human	NM_006066	146.176	101.355	113.841	0.21658	-0.134898	0.252934	120.458	0.883599	0.22083	0.379182	0	0	0	0	NA
231	AKR1B1	AKR1B1	aldo-keto reductase family 1 member B	HGNC:381	7q35	hDG25K05	human	NM_001628	153.571	57.9886	58.4775	0.352715	-1.27404	-1.09605	90.0125	0.033509	0.962969	0.654522	0	0	0	0	0.00653595
57016	AKR1B10	AKR1B10	aldo-keto reductase family 1 member B10	HGNC:382	7q33	hDG25M05	human	NM_020299	227.521	123.609	77.8547	1.71407	0.449661	-0.623904	142.995	1.51289	0.0360874	0.199475	1	0	1	0	0.00980392
1645	AKR1C1	AKR1C1	aldo-keto reductase family 1 member C1	HGNC:384	10p15-p14	hDG25P11	human	NM_001353	97.1008	95.0785	122.837	-0.686867	-0.299774	0.472144	105.006	0.452147	0.530979	0.531176	0	0	0	0	NA
1646	AKR1C2	AKR1C2	aldo-keto reductase family 1 member C2	HGNC:385	10p15-p14	hDG25B13	human	NM_001354	74.2437	64.2653	127.682	-1.10765	-1.10916	0.590179	88.7302	-0.00229498	0.997463	0.664057	0	0	0	0	NA
8644	AKR1C3	AKR1C3	aldo-keto reductase family 1 member C3	HGNC:386	10p15-p14	hDG25O05	human	NM_003739	134.748	93.3666	48.7889	0.00618799	-0.34474	-1.33212	92.3011	0.0974128	0.892632	0.638998	0	0	0	0	NA
1109	AKR1C4	AKR1C4	aldo-keto reductase family 1 member C4	HGNC:387	10p15.1	hDG25A07	human	NM_001818	93.0672	89.9429	122.837	-0.761123	-0.434672	0.472144	101.949	0.366807	0.61127	0.56113	0	0	0	0	0.00653595
389932	TAKR	AKR1C6P	aldo-keto reductase family 1 member C6, pseudogene	HGNC:44680	10p15.1	hDG25H08	human	XM_372302	195.252	80.8131	86.8512	1.12003	-0.674491	-0.404694	120.972	0.897969	0.213452	0.375814	0	0	0	0	NA
340811	AKR1CL1	AKR1C8P	aldo-keto reductase family 1 member C8, pseudogene	HGNC:23469	10p15.1	hDG25C07	human	NM_001007536	142.815	88.8017	82.0069	0.1547	-0.464649	-0.52273	104.541	0.439183	0.542832	0.536302	0	0	0	0	NA
6718	AKR1D1	AKR1D1	aldo-keto reductase family 1 member D1	HGNC:388	7q32-q33	hDG25G07	human	NM_005989	193.235	59.1298	82.699	1.0829	-1.24406	-0.505868	111.688	0.638736	0.376183	0.466048	0	0	0	0	0.00653595
83592	AKR1CL2	AKR1E2	aldo-keto reductase family 1 member E2	HGNC:23437	10p15.2	hDG25E07	human	NM_031436	177.101	95.6491	69.5502	0.785875	-0.284785	-0.826251	114.1	0.706085	0.327924	0.442484	0	0	0	0	NA
8574	AKR7A2	AKR7A2	aldo-keto reductase family 7 member A2	HGNC:389	1p36.13	hDG25I07	human	NM_003689	158.277	124.18	93.7716	0.439347	0.464649	-0.236072	125.41	1.02187	0.156808	0.341249	0	0	0	0	0.00653595
22977	AKR7A3	AKR7A3	aldo-keto reductase family 7 member A3	HGNC:390	1p36.13	hDG25D13	human	NM_012067	154.244	145.863	97.2318	0.365091	1.03422	-0.15176	132.446	1.21835	0.0913893	0.281796	0	0	0	0	NA
246181	AFAR3	AKR7L	aldo-keto reductase family 7 like (gene/pseudogene)	HGNC:24056	1p36.1-p35	hDG25J22	human	NM_201252	109.874	71.6833	135.294	-0.451723	-0.91431	0.775664	105.617	0.469224	0.515587	0.52595	0	0	0	0	NA
207	AKT1	AKT1	AKT serine/threonine kinase 1	HGNC:391	14q32.33	K01P19	human	NM_005163	127.63	100.676	80.2524	0.341995	0.107062	-0.740066	102.853	0.392044	0.586973	0.551937	0	0	0	0	0.00653595
208	AKT2	AKT2	AKT serine/threonine kinase 2	HGNC:392	19q13.1-q13.2	K01C16	human	NM_001626	153.701	102.995	165.506	1.00699	0.171299	1.39582	140.734	1.44977	0.0445666	0.216947	1	0	1	0	0.00980392
10000	AKT3	AKT3	AKT serine/threonine kinase 3	HGNC:393	1q44	K01F06	human	NM_005465	171.206	131.208	129.984	1.45348	0.952852	0.505868	144.132	1.54465	0.0323379	0.192021	1	0	1	0	0.0130719
64400	FTS	AKTIP	AKT interacting protein	HGNC:16710	16q12.2	hDG19N11	human	NM_001012398	117.837	101.498	105.374	0.560721	0.22483	0.150873	108.236	0.542347	0.452352	0.499878	0	0	0	0	NA
210	ALAD	ALAD	aminolevulinate dehydratase	HGNC:395	9q32	hDG22E06	human	NM_000031	111.371	230.12	71.5264	0.438419	1.07597	-0.860863	137.672	1.36428	0.0587539	0.236449	0	0	0	0	0.00653595
212	ALAS2	ALAS2	5'-aminolevulinate synthase 2	HGNC:397	Xp11.21	hDG22K13	human	NM_000032	103.492	118.909	135.095	0.160192	-0.417542	2.22759	119.165	0.84752	0.240258	0.388766	0	0	0	0	0.0130719
213	ALB	ALB	albumin	HGNC:399	4q13.3	hDG30G17	human	NM_000477	139.728	91.0521	76.6302	0.96958	-0.109109	-0.553428	102.47	0.381356	0.597214	0.555364	0	0	0	0	0.0196078
214	ALCAM	ALCAM	activated leukocyte cell adhesion molecule	HGNC:400	3q13.1	hDG02C18	human	NM_001627	51.7073	32.4076	50.6437	-0.248497	-0.92826	-0.141741	44.9195	-1.22558	0.0894754	0.281165	0	0	0	0	0.00980392
126133	ALDH16A1	ALDH16A1	aldehyde dehydrogenase 16 family member A1	HGNC:28114	19q13.33	hDG25F13	human	NM_153329	154.244	107.061	107.612	0.365091	0.0149887	0.101174	122.972	0.953823	0.186295	0.360867	0	0	0	0	0.00326797
5832	ALDH18A1	ALDH18A1	aldehyde dehydrogenase 18 family member A1	HGNC:9722	10q24.1	K01C10	human	NM_001017423	113.85	122.705	123.253	-0.00949987	0.717316	0.337245	119.936	0.869042	0.228524	0.382765	0	0	0	0	0.00653595
216	ALDH1A1	ALDH1A1	aldehyde dehydrogenase 1 family member A1	HGNC:402	9q21.13	hDG25K07	human	NM_000689	104.496	83.0956	30.1038	-0.550731	-0.614536	-1.7874	72.5651	-0.453662	0.529616	0.530811	0	0	0	0	NA
8854	ALDH1A2	ALDH1A2	aldehyde dehydrogenase 1 family member A2	HGNC:15472	15q21.2	hDG25M07	human	NM_003888	210.042	65.9772	87.5433	1.3923	-1.0642	-0.387832	121.187	0.903982	0.210424	0.374978	0	0	0	0	0.0163399
220	ALDH1A3	ALDH1A3	aldehyde dehydrogenase 1 family member A3	HGNC:409	15q26.3	hDG25A09	human	NM_000693	177.101	108.773	115.225	0.785875	0.0599547	0.286659	133.7	1.25335	0.0824604	0.2716	0	0	0	0	NA
219	ALDH1B1	ALDH1B1	aldehyde dehydrogenase 1 family member B1	HGNC:407	9p13	hDG25C09	human	NM_000692	74.2437	100.214	163.668	-1.10765	-0.164876	1.46702	112.708	0.66723	0.355229	0.454484	0	0	0	0	0.00653595
10840	ALDH1L1	ALDH1L1	aldehyde dehydrogenase 1 family member L1	HGNC:3978	3q21.2	hDG25E09	human	NM_012190	130.714	158.987	227.336	-0.0680679	1.37896	3.01835	172.346	2.33243	0.00123209	0.0414459	1	0	1	1	0.0196078
160428	ALDH1L2	ALDH1L2	aldehyde dehydrogenase 1 family member L2	HGNC:26777	12q23.3	hDG25G09	human	NM_001034173	180.462	162.411	106.92	0.847754	1.46889	0.0843113	149.931	1.70657	0.0180559	0.151146	1	0	1	0	0.0163399
217	ALDH2	ALDH2	aldehyde dehydrogenase 2 family (mitochondrial)	HGNC:404	12q24.12	hDG25H13	human	NM_000690	240.294	150.428	89.6194	1.94922	1.15413	-0.337245	160.114	1.99089	0.00581466	0.0926656	1	0	1	0	0.00326797
218	ALDH3A1	ALDH3A1	aldehyde dehydrogenase 3 family member A1	HGNC:405	17p11.2	hDG25I09	human	NM_000691	232.899	83.0956	48.0969	1.81308	-0.614536	-1.34898	121.364	0.908907	0.207988	0.373489	0	0	0	0	NA
224	ALDH3A2	ALDH3A2	aldehyde dehydrogenase 3 family member A2	HGNC:403	17p11.2	hDG25J13	human	NM_000382	266.513	165.264	145.675	2.43188	1.54383	1.0286	192.484	2.89473	6.074e-05	0.00741274	1	1	1	1	NA
221	ALDH3B1	ALDH3B1	aldehyde dehydrogenase 3 family member B1	HGNC:410	11q13	hDG25K09	human	NM_000694	145.504	120.756	73.0104	0.204204	0.374717	-0.74194	113.09	0.677888	0.347588	0.451065	0	0	0	0	NA
222	ALDH3B2	ALDH3B2	aldehyde dehydrogenase 3 family member B2	HGNC:411	11q13.2	hDG25M09	human	NM_000695	181.134	56.8474	116.609	0.86013	-1.30402	0.320383	118.197	0.820479	0.255631	0.398621	0	0	0	0	0.00653595
8659	ALDH4A1	ALDH4A1	aldehyde dehydrogenase 4 family member A1	HGNC:406	1p36	hDG25O09	human	NM_003748	92.395	123.609	73.0104	-0.773499	0.449661	-0.74194	96.3382	0.210135	0.770922	0.60919	0	0	0	0	0.00326797
7915	ALDH5A1	ALDH5A1	aldehyde dehydrogenase 5 family member A1	HGNC:408	6p22	hDG25A11	human	NM_001080	72.8992	98.5021	89.6194	-1.1324	-0.209842	-0.337245	87.0069	-0.0504143	0.944308	0.648876	0	0	0	0	NA
4329	ALDH6A1	ALDH6A1	aldehyde dehydrogenase 6 family member A1	HGNC:7179	14q24.3	hDG25C11	human	NM_005589	99.7899	80.8131	96.5398	-0.637363	-0.674491	-0.168623	92.3809	0.0996408	0.890187	0.638755	0	0	0	0	NA
501	ALDH7A1	ALDH7A1	aldehyde dehydrogenase 7 family member A1	HGNC:877	5q23.2	hDG25E11	human	NM_001182	136.765	100.214	141.522	0.0433159	-0.164876	0.927425	126.167	1.04302	0.148398	0.337023	0	0	0	0	0.00653595
64577	ALDH8A1	ALDH8A1	aldehyde dehydrogenase 8 family member A1	HGNC:15471	6q24.1-q25.1	hDG25G11	human	NM_022568	145.504	115.05	147.059	0.204204	0.22483	1.06232	135.871	1.31398	0.0686631	0.25252	0	0	0	0	0.00326797
223	ALDH9A1	ALDH9A1	aldehyde dehydrogenase 9 family member A1	HGNC:412	1q24.1	hDG25L13	human	NM_000696	148.193	159.558	136.678	0.253708	1.39395	0.809389	148.143	1.65664	0.0217115	0.162882	1	0	1	0	0.00653595
226	ALDOA	ALDOA	aldolase, fructose-bisphosphate A	HGNC:414	16p11.2	hDG22G06	human	NM_000034	69.5866	208.595	77.5545	-1.03703	0.786906	-0.567992	118.579	0.831138	0.249533	0.395158	0	0	0	0	0.00326797
229	ALDOB	ALDOB	aldolase, fructose-bisphosphate B	HGNC:417	9q21.3-q22.2	hDG22I06	human	NM_000035	61.946	347.309	91.8027	-1.30683	2.64979	0.124248	167.019	2.18371	0.00249656	0.0584887	1	0	1	1	0.00980392
440138	ALG11	ALG11	ALG11, alpha-1,2-mannosyltransferase	HGNC:32456	13q14.3	hDG31E20	human	NM_001004127	186.104	145.925	163.314	1.74199	0.693227	1.46527	165.115	2.13052	0.00315895	0.0659898	1	0	1	0	NA
199857	ALG14	ALG14	ALG14, UDP-N-acetylglucosaminyltransferase subunit	HGNC:28287	1p21.3	hDG31E05	human	NM_144988	14.6561	87.4334	58.2175	-1.5508	-0.206094	-0.776827	53.4356	-0.987796	0.171103	0.34938	0	0	0	0	NA
29929	ALG6	ALG6	ALG6, alpha-1,3-glucosyltransferase	HGNC:23157	1p31.3	hDG31G05	human	NM_013339	63.8783	58.1874	55.1649	-0.605448	-0.655755	-0.841951	59.0769	-0.830281	0.249953	0.395201	0	0	0	0	0.00653595
238	ALK	ALK	anaplastic lymphoma receptor tyrosine kinase	HGNC:427	2p23	K01H09	human	NM_004304	189.455	135.845	70.5305	1.91897	1.08133	-0.983632	131.944	1.20432	0.095202	0.286194	0	0	0	0	0.0261438
121642	ALKBH2	ALKBH2	alkB homolog 2, alpha-ketoglutarate dependent dioxygenase	HGNC:32487	12q24.11	DDRA15	human	NM_001001655 NM_001145374 NM_001145375 NR_026930 NR_026931	73.8373	85.1843	75.7376	-0.756247	-0.358204	-0.722358	78.2531	-0.29484	0.682874	0.585093	0	0	0	0	0.00653595
221120	ALKBH3	ALKBH3	alkB homolog 3, alpha-ketoglutaratedependent dioxygenase	HGNC:30141	11p11.2	DDRD19	human	NM_139178	123.825	136.478	126.717	0.136261	0.708787	0.452562	129.007	1.12232	0.119924	0.310179	0	0	0	0	0.00653595
239	ALOX12	ALOX12	arachidonate 12-lipoxygenase, 12S type	HGNC:429	17p13.1	hDG25P13	human	NM_000697	95.084	86.5193	68.8581	-0.723995	-0.524604	-0.843113	83.4871	-0.148693	0.836762	0.624289	0	0	0	0	0.00653595
242	ALOX12B	ALOX12B	arachidonate 12-lipoxygenase, 12R type	HGNC:430	17p13.1	hDG01O06	human	NM_001139	79.0958	82.6909	78.3784	0.501431	0.709529	1.05991	80.055	-0.244526	0.73474	0.601007	0	0	0	0	0.0130719
246	ALOX15	ALOX15	arachidonate 15-lipoxygenase	HGNC:433	17p13.3	hDG25I11	human	NM_001140	277.941	158.987	252.249	2.64227	1.37896	3.62539	229.726	3.93461	5.04948e-08	4.68343e-05	1	1	1	1	NA
247	ALOX15B	ALOX15B	arachidonate 15-lipoxygenase, type B	HGNC:434	17p13.1	hDG25K11	human	NM_001141	99.1176	91.0842	108.304	-0.649739	-0.404694	0.118036	99.5021	0.298479	0.679177	0.583928	0	0	0	0	0.00653595
240	ALOX5	ALOX5	arachidonate 5-lipoxygenase	HGNC:435	10q11.2	hDG25M11	human	NM_000698	170.378	95.0785	115.917	0.662115	-0.299774	0.303521	127.125	1.06976	0.138282	0.329005	0	0	0	0	0.00653595
241	ALOX5AP	ALOX5AP	arachidonate 5-lipoxygenase activating protein	HGNC:436	13q12	hDG01A10	human	NM_001629	54.1644	69.0422	75.9507	-0.758802	0.0175192	0.925854	66.3858	-0.626201	0.385566	0.469108	0	0	0	0	NA
59344	ALOXE3	ALOXE3	arachidonate lipoxygenase 3	HGNC:13743	17p13.1	hDG01A08	human	NM_021628	91.0348	72.6703	56.8326	1.10492	0.201471	-0.129871	73.5126	-0.427205	0.553883	0.541453	0	0	0	0	0.00980392
248	ALPI	ALPI	alkaline phosphatase, intestinal	HGNC:437	2q37.1	hDG27D05	human	NM_001631	126.297	162.394	190.495	1.37492	0.793519	1.26583	159.728	1.98013	0.00607955	0.0949037	1	0	1	0	0.00653595
80216	ALPK1	ALPK1	alpha kinase 1	HGNC:20917	4q26	K02D11	human	NM_025144	107.153	177.195	151.831	1.23657	2.07968	2.33307	145.393	1.57986	0.0286011	0.184456	1	0	1	1	0.0130719
115701	ALPK2	ALPK2	alpha kinase 2	HGNC:20565	18q21.31	K01J14	human	NM_052947	180.517	124.251	151.671	1.69098	0.76014	1.04921	152.146	1.76842	0.0142779	0.13905	1	0	1	0	0.0228758
57538	ALPK3	ALPK3	alpha kinase 3	HGNC:17574	15q25.2	K03I09	human	NM_020778	38.4085	45.7547	81.5877	-0.937707	-1.03617	-0.205637	55.2503	-0.937127	0.194119	0.365638	0	0	0	0	0.0294118
249	ALPL	ALPL	alkaline phosphatase, liver/bone/kidney	HGNC:438	1p36.12	hDG27J16	human	NM_000478	70.5286	17.1963	44.0196	-0.466955	-1.75566	-1.14571	43.9148	-1.25364	0.0823845	0.2716	0	0	0	0	0.00980392
250	ALPP	ALPP	alkaline phosphatase, placental	HGNC:439	2q37.1	hDG27B05	human	NM_001632	83.6197	158.439	102.385	-0.0345893	0.724086	-0.184792	114.815	0.72604	0.31442	0.435191	0	0	0	0	0.00653595
251	ALPPL2	ALPPL2	alkaline phosphatase, placental like 2	HGNC:441	2q37	hDG27F05	human	NM_031313	64.2448	197.987	118.66	-0.674491	1.41841	0.0831564	126.964	1.06528	0.139969	0.331537	0	0	0	0	0.0130719
57679	ALS2	ALS2	ALS2, alsin Rho guanine nucleotide exchange factor	HGNC:443	2q33.1	hDG04E08	human	NM_020919	34.8822	69.923	65.8526	-0.838004	0.505868	-0.110875	56.8859	-0.891457	0.21675	0.378031	0	0	0	0	0.0130719
23600	AMACR	AMACR	alpha-methylacyl-CoA racemase	HGNC:451	5p13.2	hDG22C03	human	NM_014324	119.49	182.287	94.3601	0.725078	0.433601	0.248497	132.046	1.20716	0.0944116	0.285981	0	0	0	0	0.00326797
262	AMD1	AMD1	adenosylmethionine decarboxylase 1	HGNC:457	6q21	hDG22K06	human	NM_001634	81.2864	61.5097	84.8613	-0.623904	-1.18839	-0.212997	75.8858	-0.360939	0.616981	0.563145	0	0	0	0	NA
144193	AMDHD1	AMDHD1	amidohydrolase domain containing 1	HGNC:28577	12q23.1	hDG11C20	human	NM_152435	64.917	69.9341	33.8865	0.0518839	0.692477	-1.16207	56.2459	-0.909329	0.207677	0.373154	0	0	0	0	0.00653595
265	AMELX	AMELX	amelogenin, X-linked	HGNC:461	Xp22.31-p22.1	hDG02C10	human	NM_182681	51.7073	83.4901	67.1707	-0.248497	1.02175	0.53275	67.456	-0.596317	0.408647	0.479645	0	0	0	0	NA
267	AMFR	AMFR	autocrine motility factor receptor	HGNC:463	16q21	hDG19J15	human	NM_001144	69.0426	86.1897	111.664	-0.837019	-0.158214	0.310621	88.9656	0.00427628	0.995272	0.663571	0	0	0	0	NA
268	AMH	AMH	anti-Mullerian hormone	HGNC:464	19p13.3	hDG09F17	human	NM_000479	99.5195	87.6061	59.5335	0.987298	0.907968	-0.257671	82.2197	-0.184084	0.798666	0.61587	0	0	0	0	NA
269	AMHR2	AMHR2	anti-Mullerian hormone receptor type 2	HGNC:465	12q13.13	K02B07	human	NM_020547	82.8757	91.0765	113.029	0.449661	-0.0562076	1.20524	95.6604	0.19121	0.791048	0.613299	0	0	0	0	0.00326797
57463	AMIGO1	AMIGO1	adhesion molecule with Ig like domain 1	HGNC:20824	1p13.3	hDG07A05	human	NM_020703	123.28	108.617	52.3329	1.2871	2.27515	-0.727916	94.7434	0.165606	0.818508	0.620668	0	0	0	0	0.00326797
347902	AMIGO2	AMIGO2	adhesion molecule with Ig like domain 2	HGNC:24073	12q13.11	hDG05H15	human	NM_181847	105.17	38.2733	88.7871	0.321186	-1.6009	0.578135	77.41	-0.318379	0.659105	0.57744	0	0	0	0	0.00326797
386724	AMIGO3	AMIGO3	adhesion molecule with Ig like domain 3	HGNC:24075	3p21	hDG05L09	human	NM_198722	94.0057	126.634	66.5509	-0.0321186	0.967041	-0.128474	95.7302	0.193159	0.788972	0.612893	0	0	0	0	0.0130719
154810	AMOTL1	AMOTL1	angiomotin like 1	HGNC:17811	11q21	hDG01D07	human	NM_130847	71.195	42.9543	46.2115	0.102061	-1.30518	-0.716385	53.4536	-0.987295	0.171309	0.349445	0	0	0	0	0.00653595
270	AMPD1	AMPD1	adenosine monophosphate deaminase 1	HGNC:468	1p13	hDG11E20	human	NM_000036	73.9154	48.3806	37.4536	0.363187	-0.152885	-1.0158	53.2499	-0.992984	0.168856	0.347671	0	0	0	0	0.00653595
271	AMPD2	AMPD2	adenosine monophosphate deaminase 2	HGNC:469	1p13.3	hDG11B13	human	NM_139156	53.3476	47.4635	91.7513	-0.348363	-0.188857	1.21083	64.1875	-0.687582	0.340728	0.447632	0	0	0	0	0.00653595
272	AMPD3	AMPD3	adenosine monophosphate deaminase 3	HGNC:470	11p15	hDG11D13	human	NM_000480	62.346	66.724	64.4043	-0.0370599	0.566572	0.0893903	64.4914	-0.679095	0.346715	0.450898	0	0	0	0	0.00326797
64682	ANAPC1	ANAPC1	anaphase promoting complex subunit 1	HGNC:19988	2q12.1	hDG18K22	human	NM_022662	42.9648	47.5119	16.8015	-0.770847	0.0788366	-1.61291	35.7594	-1.48136	0.0401183	0.207656	-1	0	-1	0	0.0163399
10393	ANAPC10	ANAPC10	anaphase promoting complex subunit 10	HGNC:24077	4q31	hDG21K05	human	NM_014885	132.381	162.082	150	0.390495	0.361922	0.863348	148.154	1.65696	0.0216867	0.162882	1	0	1	0	NA
51529	ANAPC11	ANAPC11	anaphase promoting complex subunit 11	HGNC:14452	17q25.3	hDG19O15	human	NM_001002244	74.7163	37.604	50.1529	-0.674491	-1.37396	-1.25136	54.1577	-0.967634	0.179997	0.356204	0	0	0	0	NA
29882	ANAPC2	ANAPC2	anaphase promoting complex subunit 2	HGNC:19989	9q34.3	hDG20J16	human	NM_013366	97.4074	27.3418	56.6088	-0.154571	-1.6709	-0.392614	60.4526	-0.791866	0.272552	0.408787	0	0	0	0	0.00326797
29945	ANAPC4	ANAPC4	anaphase promoting complex subunit 4	HGNC:19990	4p15.31	hDG20L16	human	NM_013367	100.963	92.1519	77.7568	-0.0702595	-0.199281	0.312078	90.2906	0.0412726	0.954394	0.651751	0	0	0	0	NA
51433	ANAPC5	ANAPC5	anaphase promoting complex subunit 5	HGNC:15713	12q24.31	hDG18C14	human	NM_016237	21.5796	13.241	30.3309	-1.7344	-1.65557	-0.938422	21.7172	-1.87344	0.00943897	0.11311	-1	0	-1	0	0.00326797
51434	ANAPC7	ANAPC7	anaphase promoting complex subunit 7	HGNC:17380	12q13.12	hDG18E14	human	NM_016238	72.5152	46.8196	65.625	0.560616	0.0437981	0.821119	61.6532	-0.758343	0.293359	0.422589	0	0	0	0	0.00326797
283	ANG	ANG	angiogenin	HGNC:483	14q11.1-q11.2	hDG23L21	human	NM_001145	186.208	89.1489	108.546	1.67601	-0.767068	-0.0797785	127.967	1.09329	0.129826	0.321633	0	0	0	0	NA
284	ANGPT1	ANGPT1	angiopoietin 1	HGNC:484	8q23.1	hDG09E17	human	NM_001146	92.9295	50.9769	37.2211	0.752693	-0.596665	-1.09131	60.3758	-0.794011	0.271251	0.408213	0	0	0	0	0.00980392
285	ANGPT2	ANGPT2	angiopoietin 2	HGNC:485	8p23	hDG09G17	human	NM_001147	104.737	68.66	72.5152	1.17303	0.12971	0.227356	81.9706	-0.191039	0.791232	0.613299	0	0	0	0	0.00326797
51378	ANGPT4	ANGPT4	angiopoietin 4	HGNC:487	20p13	hDG10G03	human	NM_015985	34.9135	55.8737	66.4212	-0.981077	-0.478275	-0.200524	52.4028	-1.01663	0.158935	0.343461	0	0	0	0	0.00653595
9068	ANGPTL1	ANGPTL1	angiopoietin like 1	HGNC:489	1q25.2	hDG10I03	human	NM_004673	58.352	79.422	68.6302	-0.0981077	0.196215	-0.118492	68.8014	-0.558752	0.438796	0.495256	0	0	0	0	NA
23452	ANGPTL2	ANGPTL2	angiopoietin like 2	HGNC:490	9q34	hDG09I17	human	NM_012098	92.1057	97.3949	71.2982	0.723367	1.31007	0.181885	86.9329	-0.0524794	0.942031	0.648638	0	0	0	0	0.00653595
27329	ANGPTL3	ANGPTL3	angiopoietin like 3	HGNC:491	1p31.3	hDG09K17	human	NM_014495	69.8644	74.028	69.2698	-0.0684266	0.350216	0.1061	71.0541	-0.495851	0.492036	0.516234	0	0	0	0	0.00326797
51129	ANGPTL4	ANGPTL4	angiopoietin like 4	HGNC:16039	19p13.3	hDG09M17	human	NM_016109	20.4393	28.5573	47.7688	-1.82797	-1.5176	-0.697226	32.2551	-1.5792	0.028663	0.184456	-1	0	-1	0	0.00653595
253935	ANGPTL5	ANGPTL5	angiopoietin like 5	HGNC:19705	11q22.2	hDG10K03	human	NM_178127	72.6755	45.1699	75.7478	0.441485	-0.784862	0.145836	64.5311	-0.677988	0.347505	0.451065	0	0	0	0	NA
83854	ANGPTL6	ANGPTL6	angiopoietin like 6	HGNC:23140	19p13.2	hDG09O17	human	NM_031917	45.4265	66.4496	70.0811	-0.938422	0.0389129	0.136414	60.6524	-0.786289	0.275932	0.412113	0	0	0	0	0.0130719
10218	ANGPTL7	ANGPTL7	angiopoietin like 7	HGNC:24078	1p36	hDG09A19	human	NM_021146	125.88	91.0795	95.6389	1.92572	1.05065	1.09131	104.199	0.429636	0.55163	0.540961	0	0	0	0	0.00326797
287	ANK2	ANK2	ankyrin 2, neuronal	HGNC:493	4q25-q26	hDG03K04	human	NM_001148	26.64	33.8647	31.6286	-1.24281	-1.17387	-1.01174	30.7111	-1.62232	0.024587	0.172323	-1	0	-1	0	0.0653595
288	ANK3	ANK3	ankyrin 3, node of Ranvier (ankyrin G)	HGNC:494	10q21	hDG03M04	human	NM_020987	79.5371	31.1142	31.3077	1.1304	-1.31655	-1.02446	47.3197	-1.15857	0.108429	0.300744	0	0	0	0	0.0359477
51479	ANKFY1	ANKFY1	ankyrin repeat and FYVE domain containing 1	HGNC:20763	17p13.3	hDG18O14	human	NM_016376	60.0729	30.8957	25.625	0	-0.762087	-1.17303	38.8645	-1.39465	0.0533097	0.230113	0	0	0	0	0.00326797
54467	ANKIB1	ANKIB1	ankyrin repeat and IBR domain containing 1	HGNC:22215	7q21.3	hDG20D08	human	XM_377955	86.1481	212.321	75.3399	-0.421557	2.52934	0.231542	124.603	0.999348	0.166197	0.346968	0	0	0	0	0.00980392
255239	ANKK1	ANKK1	ankyrin repeat and kinase domain containing 1	HGNC:21027	11q23.2	K02G05	human	NM_178510	92.1243	190.793	75.7489	0.749434	2.41693	0.121629	119.555	0.858412	0.234309	0.385418	0	0	0	0	0.00326797
88455	ANKRD13A	ANKRD13A	ankyrin repeat domain 13A	HGNC:21268	12q24.12	hDG19B10	human	NM_033121	98.5461	64.8918	78.1127	0.00812639	-0.691145	-0.541368	80.5169	-0.231629	0.748244	0.605008	0	0	0	0	0.00653595
124930	ANKRD13B	ANKRD13B	ankyrin repeat domain 13B	HGNC:26363	17q11.2	hDG20M17	human	NM_152345	160.815	82.0253	107.968	1.34898	-0.429221	1.31878	116.936	0.785275	0.276568	0.412675	0	0	0	0	NA
338692	ANKRD13D	ANKRD13D	ankyrin repeat domain 13D	HGNC:27880	11q13.2	hDG20P19	human	NM_207354	45.8519	92.1519	68.0891	-1.37709	-0.199281	-0.010067	68.6976	-0.561649	0.436431	0.493805	0	0	0	0	0.00326797
140731	C20ORF86	ANKRD60	ankyrin repeat domain 60	HGNC:16217	20q13.32	hDG19N12	human	NM_080674	63.3688	106.156	128.44	-0.999547	0.341409	0.736615	99.3219	0.293446	0.684299	0.585093	0	0	0	0	NA
290	ANPEP	ANPEP	alanyl aminopeptidase, membrane	HGNC:500	15q25-q26	hDG28L22	human	NM_001150	76.3547	71.1716	96.4324	-0.0156858	-0.809389	0.766789	81.3196	-0.209217	0.771892	0.609203	0	0	0	0	NA
84168	ANTXR1	ANTXR1	anthrax toxin receptor 1	HGNC:21014	2p13.1	hDG05M19	human	NM_032208	121.408	100.909	105.464	0.835084	0.219413	1.10809	109.26	0.570952	0.428866	0.49117	0	0	0	0	0.00653595
118429	ANTXR2	ANTXR2	anthrax toxin receptor 2	HGNC:21732	4q21.3	hDG06H16	human	NM_058172	58.6585	77.4582	24.1945	-0.0543546	0.380168	-0.674491	53.4371	-0.987756	0.171114	0.34938	0	0	0	0	0.00326797
301	ANXA1	ANXA1	annexin A1	HGNC:533	9q21.13	hDG30E03	human	NM_000700	143.158	91.0521	90.819	1.03281	-0.109109	-0.112415	108.343	0.545339	0.449871	0.498756	0	0	0	0	0.00326797
311	ANXA11	ANXA11	annexin A11	HGNC:535	10q22.3	hDG30G03	human	NM_145869	75.7056	64.187	69.9531	-0.210778	-0.892708	-0.760964	69.9486	-0.52672	0.465484	0.505314	0	0	0	0	0.00653595
312	ANXA13	ANXA13	annexin A13	HGNC:536	8q24.13	hDG30I03	human	NM_001003954	177.456	78.4697	109.459	1.66515	-0.476111	0.466955	121.795	0.920946	0.201952	0.369818	0	0	0	0	NA
307	ANXA4	ANXA4	annexin A4	HGNC:542	2p13.3	hDG30K03	human	NM_001153	75.134	61.1265	38.515	-0.221317	-0.981979	-1.73811	58.2585	-0.853132	0.23716	0.387165	0	0	0	0	0.00326797
308	ANXA5	ANXA5	annexin A5	HGNC:543	4q27	hDG30M03	human	NM_001154	23.1154	51.6047	94.4358	-1.18036	-1.25971	0	56.3853	-0.905436	0.209639	0.374647	0	0	0	0	NA
244	ANXA8	ANXA8	annexin A8	HGNC:546	10q11.22	hDG30O03	human	NM_001630	47.124	88.3316	56.3206	-0.737724	-0.188461	-1.18468	63.9254	-0.6949	0.335613	0.445582	0	0	0	0	NA
316	AOX1	AOX1	aldehyde oxidase 1	HGNC:553	2q33	hDG01P03	human	NM_001159	106.485	67.3145	58.6534	1.88591	-0.070077	-0.0293257	77.4844	-0.316303	0.661184	0.577778	0	0	0	0	0.0130719
322	APBB1	APBB1	amyloid beta precursor protein binding family B member 1	HGNC:581	11p15	hDG09O15	human	NM_145689	43.2298	77.8172	54.2596	-1.01662	0.505868	-0.454713	58.4356	-0.848188	0.239888	0.38859	0	0	0	0	0.0130719
54518	APBB1IP	APBB1IP	amyloid beta precursor protein binding family B member 1 interacting protein	HGNC:17379	10p12.1	hDG05G15	human	NM_019043	117.349	95.8756	76.1529	0.706609	0.0731376	0.176652	96.459	0.213509	0.767348	0.608932	0	0	0	0	0.0130719
324	APC	APC	APC, WNT signaling pathway regulator	HGNC:583	5q22.2	DDRK14	human	NM_000038 NM_001127510 NM_001127511	87.1929	97.275	59.8773	-0.517791	-0.106699	-1.08789	81.4484	-0.205619	0.77571	0.610657	0	0	0	0	0.0424837
324	APC	APC	APC, WNT signaling pathway regulator	HGNC:583	5q22.2	hDG02C05	human	NM_000038	89.8135	19.1122	42.5	1.22473	-1.4358	-0.474099	50.4752	-1.07046	0.138022	0.328998	0	0	0	0	0.0424837
10297	APC2	APC2	APC2, WNT signaling pathway regulator	HGNC:24036	19p13.3	hDG02E05	human	NM_005883	75.122	41.8544	30.0449	0.656741	-0.567641	-0.98241	49.0071	-1.11145	0.123555	0.314585	0	0	0	0	0.00980392
327	APEH	APEH	acylaminoacyl-peptide hydrolase	HGNC:586	3p21	hDG28M15	human	NM_001640	59.4652	116.286	52.9819	-0.486261	0.168623	-0.681591	76.2443	-0.350929	0.626789	0.567173	0	0	0	0	NA
328	APEX1	APEX1	apurinic/apyrimidinic endodeoxyribonuclease 1	HGNC:587	14q11.2	hDG23M15	human	NM_001641	92.0904	129.298	89.0129	-0.735808	0.211605	-0.58746	103.467	0.409191	0.570722	0.546359	0	0	0	0	NA
328	APEX1	APEX1	apurinic/apyrimidinic endodeoxyribonuclease 1	HGNC:587	14q11.2	DDRI22	human	NM_001641 NM_080648 NM_080649	96.3511	100.939	74.6047	-0.354278	-0.0304855	-0.748467	90.6315	0.0507934	0.94389	0.648781	0	0	0	0	NA
27301	APEX2	APEX2	apurinic/apyrimidinic endodeoxyribonuclease 2	HGNC:17889	Xp11.23	hDG23O15	human	NM_014481	91.0269	139.607	135.333	-0.76306	0.462886	0.61647	121.989	0.926359	0.199294	0.368515	0	0	0	0	NA
27301	APEX2	APEX2	apurinic/apyrimidinic endodeoxyribonuclease 2	HGNC:17889	Xp11.23	DDRM04	human	NM_014481	168.853	106.435	123.318	0.940199	0.083835	0.374234	132.869	1.23014	0.0882966	0.279699	0	0	0	0	NA
51107	APH1A	APH1A	aph-1 homolog A, gamma-secretase subunit	HGNC:29509	1q21.2	hDG04G15	human	NM_016022	34.8822	32.3064	67.2317	-0.838004	-1.03836	-0.0554376	44.8068	-1.22873	0.0886572	0.279979	0	0	0	0	0.00326797
83464	APH1B	APH1B	aph-1 homolog B, gamma-secretase subunit	HGNC:24080	15q22.2	hDG04I15	human	NM_031301	127.542	92.8388	54.36	0.91976	1.44661	-0.572855	91.5803	0.0772851	0.91472	0.643902	0	0	0	0	NA
187	AGTRL1	APLNR	apelin receptor	HGNC:339	11q12.1	hDG08G07	human	NM_005161	108.455	100.719	76.2325	0.560892	0.126004	-0.375666	95.1354	0.176552	0.806737	0.618082	0	0	0	0	0.00653595
333	APLP1	APLP1	amyloid beta precursor like protein 1	HGNC:597	19q13.12	hDG01O05	human	NM_005166	61.0117	61.9588	48.3357	-0.412682	-0.341625	-0.599082	57.1021	-0.885422	0.219874	0.379093	0	0	0	0	0.00980392
334	APLP2	APLP2	amyloid beta precursor like protein 2	HGNC:598	11q24	hDG01A07	human	NM_001642	48.546	68.8695	51.522	-1.0428	0.00875962	-0.423128	56.3125	-0.907468	0.208606	0.37352	0	0	0	0	0.0163399
57136	C20ORF3	APMAP	adipocyte plasma membrane associated protein	HGNC:13238	20p11.2	hDG22D11	human	NM_020531	103.731	202.616	91.072	0.168623	0.706609	0.0887488	132.473	1.21909	0.0912127	0.281524	0	0	0	0	0.00326797
335	APOA1	APOA1	apolipoprotein A1	HGNC:600	11q23.3	hDG14K03	human	NM_000039	39.5728	27.356	24.0274	-1.00424	-1.44769	-1.50957	30.3187	-1.63327	0.0236354	0.170202	-1	0	-1	0	NA
336	APOA2	APOA2	apolipoprotein A2	HGNC:601	1q23.3	hDG12J06	human	NM_001643	51.3205	63.0144	48.2744	-0.722669	-0.809389	-0.875015	54.2031	-0.966367	0.180564	0.356481	0	0	0	0	0.00326797
338	APOB	APOB	apolipoprotein B	HGNC:603	2p24-p23	hDG30I17	human	NM_000384	224.33	131.52	157.59	2.52934	1.07125	1.96294	171.147	2.29895	0.00144761	0.0441668	1	0	1	1	0.0849673
344	APOC2	APOC2	apolipoprotein C2	HGNC:609	19q13.2	hDG13J15	human	NM_000483	54.0131	107.327	42.9421	-0.458654	1.10014	-1.18802	68.0939	-0.578506	0.422796	0.487623	0	0	0	0	NA
345	APOC3	APOC3	apolipoprotein C3	HGNC:610	11q23.3	hDG09G03	human	NM_000040	70.6882	80.3434	79.4118	-0.0391009	0.609636	0.485027	76.8144	-0.335009	0.6425	0.572575	0	0	0	0	NA
348	APOE	APOE	apolipoprotein E	HGNC:613	19q13.31	hDG12L06	human	NM_000041	83.4844	111.574	73.8636	0.260161	0.185485	-0.182295	89.6407	0.0231277	0.974435	0.657401	0	0	0	0	NA
350	APOH	APOH	apolipoprotein H	HGNC:616	17q24.2	hDG30K17	human	NM_000042	116.292	122.338	129.491	0.537485	0.803438	1.08956	122.707	0.946401	0.189738	0.362852	0	0	0	0	0.00653595
351	APP	APP	amyloid beta precursor protein	HGNC:620	21q21.2	hDG09E03	human	NM_000484	75.9053	33.9254	83.0629	0.146628	-1.2971	0.621441	64.2978	-0.6845	0.342899	0.44883	0	0	0	0	0.00980392
353	APRT	APRT	adenine phosphoribosyltransferase	HGNC:626	16q24	hDG01B15	human	NM_000485	46.9659	57.9851	71.7022	-1.12267	-0.543096	0.691248	58.8844	-0.835655	0.246903	0.393207	0	0	0	0	NA
54840	APTX	APTX	aprataxin	HGNC:15984	9p13.3	hDG23A17	human	NM_175069	56.4639	120.075	147.611	-1.64876	-0.0132253	0.935584	108.05	0.537148	0.456721	0.502386	0	0	0	0	NA
54840	APTX	APTX	aprataxin	HGNC:15984	9p13.3	DDRI11	human	NM_001195248 NM_001195249 NM_001195250 NM_001195251 NM_001195252 NM_001195254 NM_175069 NM_175073 NR_036576 NR_036577 NR_036578 NR_036579	207.775	181.91	111.612	1.63513	1.65384	0.104437	167.099	2.18593	0.0024583	0.0584887	1	0	1	0	NA
358	AQP1	AQP1	aquaporin 1 (Colton blood group)	HGNC:633	7p14	hDG13L15	human	NM_000385	57.3728	73.5565	45.8376	-0.337245	-0.0392907	-1.08072	58.9223	-0.834596	0.247503	0.393757	0	0	0	0	0.00326797
89872	AQP10	AQP10	aquaporin 10	HGNC:16029	1q21.3	hDG12N06	human	NM_080429	50.6898	78.6523	46.2542	-0.74194	-0.489006	-0.929703	58.5321	-0.845492	0.241385	0.389503	0	0	0	0	NA
359	AQP2	AQP2	aquaporin 2	HGNC:634	12q13.12	hDG12P06	human	NM_000486	62.6724	72.8909	40.867	-0.375788	-0.607042	-1.07554	58.8101	-0.837729	0.245733	0.392605	0	0	0	0	0.00326797
360	AQP3	AQP3	aquaporin 3 (Gill blood group)	HGNC:636	9p13	hDG13F18	human	NM_004925	136.514	60.359	69.8294	2.5226	-0.484586	-0.191617	88.9009	0.00247001	0.997269	0.664057	0	0	0	0	NA
361	AQP4	AQP4	aquaporin 4	HGNC:637	18q11.2-q12.1	hDG12B08	human	NM_001650	58.8885	146.142	124.369	-0.491415	0.8937	1.18492	109.8	0.58601	0.416814	0.484257	0	0	0	0	NA
362	AQP5	AQP5	aquaporin 5	HGNC:638	12q13	hDG12D08	human	NM_001651	36.1845	49.8457	42.8872	-1.18518	-1.07919	-1.02085	42.9725	-1.27995	0.0761459	0.262745	0	0	0	0	NA
363	AQP6	AQP6	aquaporin 6	HGNC:639	12q13	hDG12F08	human	NM_053286	45.0138	134.619	71.8434	-0.91538	0.657628	-0.236983	83.8255	-0.139245	0.847009	0.626981	0	0	0	0	0.00980392
364	AQP7	AQP7	aquaporin 7	HGNC:640	9p13	hDG12H08	human	NM_001170	31.1391	33.3848	15.9512	-1.33935	-1.41643	-1.75003	26.825	-1.73082	0.0164781	0.147886	-1	0	-1	0	0.00326797
389756	AQP7P2	AQP7P2	aquaporin 7 pseudogene 2	HGNC:32049	9q21.11	hDG12J08	human	NR_002823	68.9791	110.751	102.146	-0.183076	0.168623	0.583343	93.9589	0.1437	0.842172	0.625815	0	0	0	0	NA
343	AQP8	AQP8	aquaporin 8	HGNC:642	16p12	hDG14A05	human	NM_001169	65.6861	80.0611	84.7677	0.209842	1.03641	3.66152	76.8383	-0.334343	0.643162	0.572576	0	0	0	0	0.00326797
366	AQP9	AQP9	aquaporin 9	HGNC:643	15q	hDG13N15	human	NM_020980	28.6281	86.3658	79.757	-1.37596	0.392907	0.176287	64.917	-0.667213	0.355229	0.454484	0	0	0	0	0.00980392
367	AR	AR	androgen receptor	HGNC:644	Xq12	hDG06O21	human	NM_000044	90.7861	136.398	55.5946	0.642372	1.65557	0.229327	94.2597	0.1521	0.833083	0.623826	0	0	0	0	0.0196078
369	ARAF	ARAF	A-Raf proto-oncogene, serine/threonine kinase	HGNC:646	Xp11.3-p11.23	K01E16	human	NM_001654	60.9637	58.1643	38.3735	-1.35848	-1.07062	-1.78927	52.5005	-1.01391	0.160055	0.343559	0	0	0	0	NA
374	AREG	AREG	amphiregulin	HGNC:651	4q13.3	hDG09H04	human	NM_001657	59.4302	42.7669	71.2982	-0.439885	-0.93391	0.181885	57.8318	-0.865047	0.230672	0.384099	0	0	0	0	NA
9870	KIAA0317	AREL1	apoptosis resistant E3 ubiquitin protein ligase 1	HGNC:20363	14q24.2	hDG21O03	human	NM_014821	149.796	85.9897	87.1852	0.674491	-0.855452	-0.566572	107.657	0.52618	0.465956	0.505359	0	0	0	0	NA
383	ARG1	ARG1	arginase 1	HGNC:663	6q23	hDG11G20	human	NM_000045	66.2025	56.1766	62.0263	0.0963558	0.152885	-0.00812639	61.4684	-0.763504	0.290084	0.421057	0	0	0	0	NA
2909	GRLF1	ARHGAP35	Rho GTPase activating protein 35	HGNC:4591	19q13.32	hDG04I07	human	NM_024342	193.266	56.7356	48.154	2.16655	-0.0354995	-0.822324	99.3852	0.295215	0.68254	0.585093	0	0	0	0	0.0392157
9138	ARHGEF1	ARHGEF1	Rho guanine nucleotide exchange factor 1	HGNC:681	19q13.13	hDG04I08	human	NM_004706	242.828	42.0349	42.8674	3.10675	-0.638991	-1.03484	109.244	0.57048	0.429393	0.49117	0	0	0	0	0.0163399
9639	ARHGEF10	ARHGEF10	Rho guanine nucleotide exchange factor 10	HGNC:14103	8p23	hDG01N17	human	NM_014629	56.798	76.8168	69.578	-0.625679	0.411702	0.573946	67.7309	-0.588641	0.414703	0.483703	0	0	0	0	0.00326797
9459	ARHGEF6	ARHGEF6	Rac/Cdc42 guanine nucleotide exchange factor 6	HGNC:685	Xq26	hDG04F03	human	NM_004840	32.7273	53.4928	44.0167	-0.878882	-0.168623	-0.988637	43.4122	-1.26767	0.0790058	0.266972	0	0	0	0	0.00980392
25820	ARIH1	ARIH1	ariadne RBR E3 ubiquitin protein ligase 1	HGNC:689	15q24	hDG20A18	human	NM_005744	83.7778	79.3249	74.1314	-0.477764	-0.490539	0.191273	79.078	-0.271805	0.706451	0.591904	0	0	0	0	0.00326797
10425	ARIH2	ARIH2	ariadne RBR E3 ubiquitin protein ligase 2	HGNC:690	3p21	hDG20O22	human	NM_006321	97.4074	63.1224	54.7961	-0.154571	-0.858443	-0.453016	71.7753	-0.475714	0.509791	0.523395	0	0	0	0	NA
285598	ARL10	ARL10	ADP ribosylation factor like GTPase 10	HGNC:22042	5q35.3	hDG04D09	human	NM_173664	186.801	101.27	70.4496	2.04391	1.79273	0.0739168	119.507	0.85706	0.235044	0.385857	0	0	0	0	NA
55130	ARMC4	ARMC4	armadillo repeat containing 4	HGNC:25583	10p12.1	hDG01O09	human	NM_018076	135.455	102.559	85.2063	3.35027	1.71689	1.43696	107.74	0.528501	0.463984	0.505066	0	0	0	0	0.0326797
51309	ARMCX1	ARMCX1	armadillo repeat containing, X-linked 1	HGNC:18073	Xq22.1	hDG01K07	human	NM_016608	65.9278	65.0686	74.1299	-0.164185	-0.183952	0.825309	68.3754	-0.570645	0.429113	0.49117	0	0	0	0	NA
9823	ARMCX2	ARMCX2	armadillo repeat containing, X-linked 2	HGNC:16869	Xq22.1	hDG01M07	human	NM_177949	72.2484	52.9748	46.9701	0.15531	-0.797125	-0.674491	57.3978	-0.877164	0.224206	0.381006	0	0	0	0	0.0196078
51566	ARMCX3	ARMCX3	armadillo repeat containing, X-linked 3	HGNC:24065	Xq22.1	hDG01F07	human	NM_016607	37.8361	29.9968	53.4945	-1.58417	-1.96215	-0.314204	40.4425	-1.35059	0.0612937	0.238478	0	0	0	0	0.00326797
158947	ARMCX4	ARMCX4	armadillo repeat containing, X-linked 4	HGNC:28615	Xq22	hDG01P21	human	NM_152583	85.9432	85.8007	71.3988	0.847551	0.867202	0.674491	81.0475	-0.216813	0.763852	0.608452	0	0	0	0	NA
64860	ARMCX5	ARMCX5	armadillo repeat containing, X-linked 5	HGNC:25772	Xq22.1-q22.3	hDG01H07	human	NM_022838	83.134	62.9954	78.5301	0.705553	-0.289067	1.06829	74.8865	-0.388842	0.590027	0.552385	0	0	0	0	0.0130719
54470	ARMCX6	ARMCX6	armadillo repeat containing, X-linked 6	HGNC:26094	Xq21.33-q22.3	hDG01A09	human	NM_001009584	60.1339	66.7962	44.3907	-0.457056	-0.0963558	-0.81693	57.1069	-0.885286	0.219945	0.379093	0	0	0	0	NA
410	ARSA	ARSA	arylsulfatase A	HGNC:713	22q13.33	hDG11G22	human	NM_000487	44.3492	25.4514	73.9163	-0.659667	-1.05221	0.479457	47.9056	-1.14221	0.113505	0.305151	0	0	0	0	NA
411	ARSB	ARSB	arylsulfatase B	HGNC:714	5q14.1	hDG11I20	human	NM_000046	72.6299	58.0109	76.2943	0.318715	0.22483	0.576974	68.9784	-0.55381	0.442854	0.496545	0	0	0	0	0.00326797
414	ARSD	ARSD	arylsulfatase D	HGNC:717	Xp22.3	hDG11I22	human	NM_001669	74.7724	98.8249	88.5806	0.392835	1.82562	1.08081	87.3926	-0.0396439	0.956192	0.652498	0	0	0	0	0.00326797
415	ARSE	ARSE	arylsulfatase E (chondrodysplasia punctata 1)	HGNC:719	Xp22.33	hDG11K22	human	NM_000047	84.1993	48.3806	86.9953	0.718963	-0.152885	1.0158	73.1917	-0.436164	0.545603	0.537574	0	0	0	0	0.00326797
416	ARSF	ARSF	arylsulfatase F	HGNC:721	Xp22.3	hDG11C03	human	NM_004042	68.7734	53.4251	60.8373	0.1853	0.0449661	-0.0568848	61.0119	-0.77625	0.282107	0.415286	0	0	0	0	0.0130719
22901	ARSG	ARSG	arylsulfatase G	HGNC:24102	17q24.2	hDG11E03	human	NM_014960	34.9223	75.8957	26.3562	-0.985794	0.926301	-1.47088	45.7247	-1.2031	0.0955147	0.286389	0	0	0	0	0.00980392
347527	ARSH	ARSH	arylsulfatase family member H	HGNC:32488	Xp22.33	hDG11G03	human	NM_001011719	52.0621	46.0877	39.8316	-0.392835	-0.242817	-0.918283	45.9938	-1.19559	0.0975972	0.288103	0	0	0	0	0.00326797
340075	ARSI	ARSI	arylsulfatase family member I	HGNC:32521	5q32	hDG11I03	human	NM_001012301	43.0637	15.8212	14.8625	-0.704139	-1.42992	-1.94221	24.5825	-1.79344	0.0129593	0.133553	-1	0	-1	0	0.00980392
79642	ARSJ	ARSJ	arylsulfatase family member J	HGNC:26286	4q26	hDG11K03	human	NM_024590	68.3449	52.5079	62.0263	0.170476	0.00899321	-0.00812639	60.9597	-0.777708	0.281204	0.415286	0	0	0	0	0.00653595
153642	ARSK	ARSK	arylsulfatase family member K	HGNC:25239	5q15	hDG11M03	human	NM_198150	53.7761	28.6615	56.0812	-0.333539	-0.926301	-0.251918	46.173	-1.19059	0.099009	0.290055	0	0	0	0	0.00653595
417	ART1	ART1	ADP-ribosyltransferase 1	HGNC:723	11p15	hDG31I05	human	NM_004314	63.8783	102.666	114.473	-0.605448	0.0281038	0.423301	93.6722	0.135695	0.850858	0.627626	0	0	0	0	0.0196078
419	ART3	ART3	ADP-ribosyltransferase 3	HGNC:725	4q21.1	hDG31K05	human	NM_001179	44.5213	42.3458	29.8719	-0.977215	-0.899321	-1.38154	38.913	-1.3933	0.0535396	0.230113	0	0	0	0	0.00326797
420	ART4	ART4	ADP-ribosyltransferase 4 (Dombrock blood group)	HGNC:726	12q13.2-q13.3	hDG31M05	human	NM_021071	53.3702	74.6382	21.5863	-0.807265	-0.402821	-1.55831	49.8649	-1.0875	0.131854	0.323587	0	0	0	0	0.00653595
57412	AS3MT	AS3MT	arsenite methyltransferase	HGNC:17452	10q24.33	hDG31O05	human	NM_020682	89.8721	108.149	79.5857	-0.106219	0.112415	-0.320965	92.5357	0.103962	0.885457	0.63773	0	0	0	0	NA
84164	ASCC2	ASCC2	activating signal cointegrator 1 complex subunit 2	HGNC:24103	22q12.1	hDG19N19	human	NM_032204	58.2624	13.6439	38.27	-1.14582	-1.97351	-1.5531	36.7254	-1.45438	0.0438893	0.216575	-1	0	-1	0	NA
25842	ASF1A	ASF1A	anti-silencing function 1A histone chaperone	HGNC:20995	6q22.31	hDG23C17	human	NM_014034	56.9957	64.7338	101.291	-1.63513	-1.36221	-0.268346	74.34	-0.404101	0.575524	0.548245	0	0	0	0	0.00326797
432	ASGR1	ASGR1	asialoglycoprotein receptor 1	HGNC:742	17p13-p11	hDG05I16	human	NM_001671	110.752	80.776	62.0025	0.497838	-0.365688	-0.273008	84.51	-0.120132	0.867796	0.633072	0	0	0	0	0.00326797
433	ASGR2	ASGR2	asialoglycoprotein receptor 2	HGNC:743	17p	hDG07G07	human	NM_001181	61.2543	70.5466	58.7104	-1.07671	0.0402681	-0.500859	63.5038	-0.706672	0.327486	0.442484	0	0	0	0	0.00326797
55870	ASH1L	ASH1L	ASH1 like histone lysine methyltransferase	HGNC:19088	1q22	hDG18E09	human	NM_018489	49.9635	32.6266	55.0368	-0.4555	-0.674491	0.293257	45.8756	-1.19889	0.0966766	0.286389	0	0	0	0	0.0196078
41	ACCN2	ASIC1	acid sensing ion channel subunit 1	HGNC:100	12q12	hDG14C09	human	NM_001095	44.731	75.5236	44.7772	-0.764423	0.82255	0.256949	55.0106	-0.943821	0.190951	0.363567	0	0	0	0	0.00653595
40	ACCN1	ASIC2	acid sensing ion channel subunit 2	HGNC:99	17q11.2-q12	hDG14A09	human	NM_001094	114.366	56.6754	80.2405	2.47313	-0.065804	3.2761	83.7607	-0.141054	0.845042	0.626139	0	0	0	0	0.0196078
9311	ACCN3	ASIC3	acid sensing ion channel subunit 3	HGNC:101	7q35	hDG14C03	human	NM_004769	62.7846	69.2408	34.9682	0.0749434	0.526432	-0.578135	55.6645	-0.925561	0.199677	0.368648	0	0	0	0	NA
55515	ACCN4	ASIC4	acid sensing ion channel subunit family member 4	HGNC:21263	2q36.1	hDG12K11	human	NM_018674	39.9685	78.6523	59.7222	-1.06955	-0.489006	-0.565114	59.4477	-0.819928	0.255911	0.398924	0	0	0	0	0.00653595
51802	ACCN5	ASIC5	acid sensing ion channel subunit family member 5	HGNC:17537	4q32.1	hDG12M11	human	NM_017419	101.774	67.1296	128.409	0.819024	-0.725078	1.29429	99.1042	0.287367	0.690496	0.586672	0	0	0	0	0.0130719
438	ASMT	ASMT	acetylserotonin O-methyltransferase	HGNC:750	Xp22.3 and Yp11.3	hDG09I18	human	NM_004043	37.1889	37.7146	74.9493	-1.23168	-1.14145	0.318299	49.951	-1.0851	0.132708	0.324282	0	0	0	0	0.00653595
8623	ASMTL	ASMTL	acetylserotonin O-methyltransferase-like	HGNC:751	Xp22.3 and Yp11.3	hDG10K09	human	NM_004192	40.1221	84.1317	34.0236	-0.784862	0.331114	-1.40367	52.7591	-1.00669	0.163058	0.345422	0	0	0	0	0.00980392
443	ASPA	ASPA	aspartoacylase	HGNC:756	17p13.3	hDG11O22	human	NM_000049	54.2046	105.245	65.1969	-0.318715	2.07743	0.121896	74.8822	-0.388962	0.589918	0.552385	0	0	0	0	0.00326797
253982	ASPHD1	ASPHD1	aspartate beta-hydroxylase domain containing 1	HGNC:27380	16p11.2	hDG25A13	human	NM_198907	111.218	126.462	157.439	-0.426971	0.524604	1.31526	131.707	1.1977	0.0970106	0.28692	0	0	0	0	0.00326797
79058	ASPSCR1	ASPSCR1	ASPSCR1, UBX domain containing tether for SLC2A4	HGNC:13825	17q25	hDG18F05	human	NM_024083	44.52	50.2813	43.8603	-0.70077	0.218991	-0.263931	46.2205	-1.18926	0.0993845	0.290056	0	0	0	0	0.00653595
445	ASS	ASS1	argininosuccinate synthase 1	HGNC:758	9q34.1	hDG22I09	human	NM_054012	94.18	177.504	80.4772	-0.168623	0.369364	-0.425994	117.387	0.797863	0.268955	0.406293	0	0	0	0	0.00326797
431705	ASTL	ASTL	astacin-like metallo-endopeptidase (M12 family)	HGNC:31704	2q11.1	hDG28O15	human	NM_001002036	95.4961	160.622	73.0032	0.517632	1.12977	-0.0141998	109.707	0.583427	0.418871	0.485268	0	0	0	0	0.00653595
84896	ATAD1	ATAD1	ATPase family, AAA domain containing 1	HGNC:25903	10q23.31	hDG11O03	human	NM_032810	115.479	89.1946	120.684	1.80111	1.44791	2.39729	108.453	0.548395	0.447329	0.497442	0	0	0	0	0.00326797
55210	ATAD3A	ATAD3A	ATPase family, AAA domain containing 3A	HGNC:25567	1p36.33	hDG11A05	human	NM_018188	105.624	91.0289	102.056	1.46016	1.51985	1.63341	99.5696	0.300365	0.677264	0.583473	0	0	0	0	0.00326797
27315	FRAG1	ATAD5	ATPase family, AAA domain containing 5	HGNC:25752	17q11.2	hDG04C15	human	NM_014489	235.286	51.1147	80.5631	2.96367	-0.266246	0.480459	122.321	0.935642	0.194925	0.365638	0	0	0	0	0.0326797
10533	ATG7	ATG7	autophagy related 7	HGNC:16935	3p25.3-p25.2	hDG20F03	human	NM_006395	58.2963	117.131	54.7961	-1.082	0.367904	-0.453016	76.7411	-0.337059	0.640477	0.571969	0	0	0	0	NA
79065	ATG9A	ATG9A	autophagy related 9A	HGNC:22408	2q35	hDG01P09	human	NM_024085	68.0347	71.461	60.1707	-0.0576867	0.140154	0.054462	66.5554	-0.621463	0.38917	0.470677	0	0	0	0	0.00326797
285973	ATG9B	ATG9B	autophagy related 9B	HGNC:21899	7q36	hDG01J19	human	NM_173681	59.256	58.8489	38.7767	-0.501431	-0.499298	-1.12694	52.2939	-1.01968	0.157691	0.342047	0	0	0	0	NA
51062	SPG3A	ATL1	atlastin GTPase 1	HGNC:11231	14q21.3	hDG04E17	human	NM_181598	75.8249	37.9273	26.7778	-0.0613173	-0.807614	-1.68161	46.8433	-1.17187	0.104434	0.296038	0	0	0	0	NA
25923	DKFZP564J0863	ATL3	atlastin GTPase 3	HGNC:24526	11q13.1	hDG04G17	human	NM_015459	33.8047	81.5971	75.0467	-0.858443	0.985112	0.258709	63.4828	-0.707257	0.327093	0.442484	0	0	0	0	0.00326797
472	ATM	ATM	ATM serine/threonine kinase	HGNC:795	11q22-q23	K01I03	human	NM_000051	108.636	83.6715	116.896	-0.142498	-0.364011	0.177991	103.068	0.398046	0.581258	0.550349	0	0	0	0	0.0261438
472	ATM	ATM	ATM serine/threonine kinase	HGNC:795	11q22-q23	DDRM18	human	NM_000051	63.1529	61.003	58.7444	-0.947012	-0.861214	-1.114	60.9667	-0.777511	0.281326	0.415286	0	0	0	0	0.0261438
57194	ATP10A	ATP10A	ATPase phospholipid transporting 10A (putative)	HGNC:13542	15q12	hDG13P15	human	NM_024490	15.5623	46.7734	56.1789	-1.8481	-0.942977	-0.697485	39.5049	-1.37677	0.0564394	0.234207	0	0	0	0	0.0457516
57205	ATP10D	ATP10D	ATPase phospholipid transporting 10D (putative)	HGNC:13549	4p12	hDG12L08	human	NM_020453	140.875	151.08	160.732	2.01384	0.994874	2.16931	150.896	1.7335	0.0163117	0.147172	1	0	1	1	0.00326797
23250	ATP11A	ATP11A	ATPase phospholipid transporting 11A	HGNC:13552	13q34	hDG12N08	human	NM_015205	53.2125	117.335	59.7222	-0.664855	0.303521	-0.565114	76.7567	-0.336622	0.64091	0.57213	0	0	0	0	0.0163399
23200	ATP11B	ATP11B	ATPase phospholipid transporting 11B (putative)	HGNC:13553	3q27	hDG12B10	human	NM_014616	60.7804	81.9444	62.4158	-0.433601	-0.421557	-0.492196	68.3802	-0.570511	0.429223	0.49117	0	0	0	0	0.00980392
286410	ATP11C	ATP11C	ATPase phospholipid transporting 11C	HGNC:13554	Xq27.1	hDG13H18	human	NM_001010986	136.141	63.0762	49.9741	2.50911	-0.392907	-0.927425	83.0637	-0.160515	0.823997	0.62277	0	0	0	0	0.0228758
479	ATP12A	ATP12A	ATPase H+/K+ transporting non-gastric alpha2 subunit	HGNC:13816	13q11-q12.1	hDG12O11	human	NM_001676	74.0244	142.85	120.328	-0.0289067	0.826251	1.07554	112.401	0.65864	0.361447	0.457985	0	0	0	0	0.0196078
57130	ATP13A1	ATP13A1	ATPase 13A1	HGNC:24215	19p13.11	hDG12A13	human	NM_020410	162.948	203.755	45.5808	2.68833	2.07406	-0.947933	137.428	1.35746	0.060029	0.238229	0	0	0	0	NA
23400	ATP13A2	ATP13A2	ATPase 13A2	HGNC:30213	1p36	hDG12C13	human	NM_022089	72.7631	140.381	201.136	-0.0674491	0.775664	3.26308	138.093	1.37603	0.0565942	0.234337	0	0	0	0	NA
84239	ATP13A4	ATP13A4	ATPase 13A4	HGNC:25422	3q29	hDG12E13	human	NM_032279	84.1151	172.479	145.918	0.279432	1.43329	1.76826	134.171	1.2665	0.0792969	0.267133	0	0	0	0	0.0392157
344905	ATP13A5	ATP13A5	ATPase 13A5	HGNC:31789	3q29	hDG14E09	human	NM_198505	80.5158	76.2216	41.759	0.899321	0.855452	0	66.1655	-0.632351	0.38092	0.467584	0	0	0	0	0.00980392
476	ATP1A1	ATP1A1	ATPase Na+/K+ transporting subunit alpha 1	HGNC:799	1p13	hDG14G09	human	NM_000701	63.7518	73.0803	46.2863	0.119909	0.707393	0.385423	61.0394	-0.775482	0.282585	0.415768	0	0	0	0	0.00326797
477	ATP1A2	ATP1A2	ATPase Na+/K+ transporting subunit alpha 2	HGNC:800	1q23.2	hDG12G13	human	NM_000702	29.2471	20.216	42.2138	-1.39716	-1.68623	-1.03908	30.559	-1.62656	0.0242146	0.171444	-1	0	-1	0	0.0163399
478	ATP1A3	ATP1A3	ATPase Na+/K+ transporting subunit alpha 3	HGNC:801	19q13.2	hDG12I13	human	NM_152296	81.5924	117.335	117.635	0.202347	0.303521	1.00262	105.521	0.466535	0.517991	0.527317	0	0	0	0	0.00980392
480	ATP1A4	ATP1A4	ATPase Na+/K+ transporting subunit alpha 4	HGNC:14073	1q23.2	hDG12K13	human	NM_144699	74.6551	90.9979	66.4562	-0.00963558	-0.236072	-0.382819	77.3698	-0.319504	0.657969	0.57744	0	0	0	0	0.0130719
481	ATP1B1	ATP1B1	ATPase Na+/K+ transporting subunit beta 1	HGNC:804	1q24.2	hDG12D10	human	NM_001001787	34.2925	63.8374	51.6414	-1.24299	-0.792527	-0.783868	49.9238	-1.08586	0.132435	0.324197	0	0	0	0	0.00653595
482	ATP1B2	ATP1B2	ATPase Na+/K+ transporting subunit beta 2	HGNC:805	17p13.1	hDG12F10	human	NM_001678	74.0244	92.644	94.0657	-0.0289067	-0.202347	0.36459	86.9114	-0.0530814	0.941367	0.648638	0	0	0	0	NA
483	ATP1B3	ATP1B3	ATPase Na+/K+ transporting subunit beta 3	HGNC:806	3q23	hDG12H10	human	NM_001679	20.4178	52.3148	28.7458	-1.66696	-1.0286	-1.40367	33.8261	-1.53534	0.0333939	0.194464	-1	0	-1	0	0.00980392
23439	ATP1B4	ATP1B4	ATPase Na+/K+ transporting family member beta 4	HGNC:808	Xq24	hDG13B17	human	NM_012069	128.675	114.313	76.0341	2.23931	1.33588	0.0383233	106.341	0.489429	0.497668	0.518059	0	0	0	0	0.00980392
487	ATP2A1	ATP2A1	ATPase sarcoplasmic/endoplasmic reticulum Ca2+ transporting 1	HGNC:811	16p12.1	hDG12O13	human	NM_004320	83.4844	72.8909	83.9646	0.260161	-0.607042	0.0911474	80.1133	-0.242897	0.736441	0.601406	0	0	0	0	0.00653595
488	ATP2A2	ATP2A2	ATPase sarcoplasmic/endoplasmic reticulum Ca2+ transporting 2	HGNC:812	12q24.11	hDG12A15	human	NM_001681	141.506	160.957	83.9646	2.03311	1.19722	0.0911474	128.809	1.11679	0.121771	0.311826	0	0	0	0	0.0130719
489	ATP2A3	ATP2A3	ATPase sarcoplasmic/endoplasmic reticulum Ca2+ transporting 3	HGNC:813	17p13.3	hDG12C15	human	NM_005173	65.1951	137.912	188.342	-0.298703	0.725078	2.91672	130.483	1.16353	0.106952	0.299141	0	0	0	0	0.00980392
490	ATP2B1	ATP2B1	ATPase plasma membrane Ca2+ transporting 1	HGNC:814	12q21.33	hDG14I09	human	NM_001682	41.1848	58.0716	46.2863	-0.929298	0	0.385423	48.5142	-1.12521	0.118971	0.308574	0	0	0	0	0.00980392
491	ATP2B2	ATP2B2	ATPase plasma membrane Ca2+ transporting 2	HGNC:815	3p25.3	hDG14K09	human	NM_001001331	26.6774	72.3822	28.9319	-1.60379	0.674491	-1.09203	42.6638	-1.28857	0.0741943	0.259682	0	0	0	0	0.00653595
492	ATP2B3	ATP2B3	ATPase plasma membrane Ca2+ transporting 3	HGNC:816	Xq28	hDG12E15	human	NM_001001344	49.4285	31.7387	62.4158	-0.780482	-1.45016	-0.492196	47.861	-1.14345	0.113109	0.304902	0	0	0	0	0.0294118
493	ATP2B4	ATP2B4	ATPase plasma membrane Ca2+ transporting 4	HGNC:817	1q32.1	hDG12G15	human	NM_001001396	26.7245	47.3765	37.5	-1.47424	-1.12977	-1.16669	37.2003	-1.44112	0.0458475	0.217848	-1	0	-1	0	0.0130719
27032	ATP2C1	ATP2C1	ATPase secretory pathway Ca2+ transporting 1	HGNC:13211	3q21.3	hDG12I15	human	NM_001001486	75.9164	45.7305	61.069	0.0289067	-1.1635	-0.528655	60.9053	-0.779227	0.280268	0.414828	0	0	0	0	0.00980392
9914	KIAA0703	ATP2C2	ATPase secretory pathway Ca2+ transporting 2	HGNC:29103	16q24.1	hDG13F13	human	NM_014861	99.5567	137.215	133.118	1.1871	2.1086	2.15377	123.297	0.96287	0.182151	0.357785	0	0	0	0	0.0196078
495	ATP4A	ATP4A	ATPase H+/K+ transporting alpha subunit	HGNC:819	19q13.1	hDG12K15	human	NM_000704	67.0871	39.9691	20.665	-0.24089	-1.28153	-1.62242	42.5737	-1.29108	0.0736304	0.259245	0	0	0	0	0.00980392
496	ATP4B	ATP4B	ATPase H+/K+ transporting beta subunit	HGNC:820	13q34	hDG13D17	human	NM_000705	59.2394	71.2276	98.7849	-0.269796	-0.117872	0.881437	76.4173	-0.346099	0.631535	0.569356	0	0	0	0	0.00653595
506	ATP5B	ATP5B	ATP synthase, H+ transporting, mitochondrial F1 complex, beta polypeptide	HGNC:830	12p13.3	hDG12M15	human	NM_001686	60.7804	75.3601	80.5976	-0.433601	-0.556455	0	72.2461	-0.462569	0.521552	0.528668	0	0	0	0	NA
27109	ATP5S	ATP5S	ATP synthase, H+ transporting, mitochondrial Fo complex subunit s (factor B)	HGNC:18799	14q21.3	hDG13J18	human	NM_001003803	139.127	106.162	57.8335	2.61702	1.06085	-0.636167	101.041	0.341448	0.636136	0.570626	0	0	0	0	0.00326797
523	ATP6V1A	ATP6V1A	ATPase H+ transporting V1 subunit A	HGNC:851	3q13.31	hDG13F14	human	NM_001690	86.4909	141.485	109.953	0.71496	2.25267	1.29533	112.643	0.665402	0.356534	0.455123	0	0	0	0	0.00326797
525	ATP6V1B1	ATP6V1B1	ATPase H+ transporting V1 subunit B1	HGNC:853	2p13	hDG12O15	human	NM_001692	51.3205	81.1214	80.5976	-0.722669	-0.438419	0	71.0132	-0.496994	0.491042	0.516234	0	0	0	0	0.00653595
526	ATP6V1B2	ATP6V1B2	ATPase H+ transporting V1 subunit B2	HGNC:854	8p21.3	hDG14M09	human	NM_001693	55.3697	47.6003	16.482	-0.269796	-0.49353	-2.15195	39.8173	-1.36805	0.0580208	0.23603	0	0	0	0	0.00653595
245973	ATP6V1C2	ATP6V1C2	ATPase H+ transporting V1 subunit C2	HGNC:18264	2p25.1	hDG12J10	human	NM_144583	95.4671	128.858	122.348	0.626313	0.539593	1.13023	115.558	0.746791	0.300775	0.427215	0	0	0	0	0.00980392
538	ATP7A	ATP7A	ATPase copper transporting alpha	HGNC:869	Xq21.1	hDG14O09	human	NM_000052	54.4026	30.8464	49.6817	-0.314762	-1.28318	0.674491	44.9769	-1.22398	0.0898951	0.281165	0	0	0	0	0.0261438
540	ATP7B	ATP7B	ATPase copper transporting beta	HGNC:870	13q14.3	hDG12A17	human	NM_000053	88.5298	228.447	143.224	0.41433	2.57993	1.69534	153.4	1.80343	0.0124741	0.130698	1	0	1	1	0.0130719
10396	ATP8A1	ATP8A1	ATPase phospholipid transporting 8A1	HGNC:13531	4p13	hDG12L10	human	NM_006095	123.847	136.265	110.227	1.49352	0.691353	0.802097	123.447	0.967061	0.180253	0.356204	0	0	0	0	0.0228758
51761	ATP8A2	ATP8A2	ATPase phospholipid transporting 8A2	HGNC:13533	13q12	hDG12N10	human	NM_016529	103.666	153.549	82.6178	0.876838	1.04546	0.0546884	113.278	0.683122	0.343878	0.449272	0	0	0	0	0.0424837
5205	ATP8B1	ATP8B1	ATPase phospholipid transporting 8B1	HGNC:3706	18q21	hDG12P10	human	NM_005603	117.54	104.99	60.3956	1.3008	0.0505868	-0.546884	94.3086	0.153465	0.831605	0.623826	0	0	0	0	0.00653595
57198	ATP8B2	ATP8B2	ATPase phospholipid transporting 8B2	HGNC:13534	1q21.3	hDG12B12	human	NM_020452	83.4844	152.726	152.652	0.260161	1.0286	1.95055	129.621	1.13946	0.114385	0.305753	0	0	0	0	0.00980392
148229	ATP8B3	ATP8B3	ATPase phospholipid transporting 8B3	HGNC:13535	19p13.3	hDG13F17	human	NM_138813	65.9589	31.6351	52.456	-0.0269796	-1.45376	-0.835449	50.0167	-1.08326	0.133363	0.32478	0	0	0	0	0.00980392
79895	ATP8B4	ATP8B4	ATPase phospholipid transporting 8B4 (putative)	HGNC:13536	15q21.2	hDG13L18	human	NM_024837	79.398	38.2339	55.7653	0.458654	-1.23111	-0.712814	57.7991	-0.86596	0.230183	0.383755	0	0	0	0	0.0196078
10079	ATP9A	ATP9A	ATPase phospholipid transporting 9A (putative)	HGNC:13540	20q13.2	hDG12D12	human	NM_006045	94.8364	93.4671	65.7828	0.607042	-0.185485	-0.401049	84.6954	-0.114955	0.873443	0.634596	0	0	0	0	0.00980392
374868	ATP9B	ATP9B	ATPase phospholipid transporting 9B (putative)	HGNC:13541	18q23	hDG12F12	human	NM_198531	116.279	151.08	68.4764	1.26226	0.994874	-0.328131	111.945	0.645919	0.370801	0.46313	0	0	0	0	0.00980392
545	ATR	ATR	ATR serine/threonine kinase	HGNC:882	3q23	K02B06	human	NM_001184	73.6272	142.068	62.0542	0.149887	1.20846	-0.276431	92.5831	0.105286	0.884013	0.637542	0	0	0	0	0.0555556
545	ATR	ATR	ATR serine/threonine kinase	HGNC:882	3q23	DDRE14	human	NM_001184	210.064	172.384	188.648	1.67601	1.45568	1.87987	190.365	2.83558	8.55246e-05	0.00952438	1	1	1	0	0.0555556
84126	ATRIP	ATRIP	ATR interacting protein	HGNC:33499	3p21.31	DDRJ03	human	NM_032166 NM_130384	121.154	67.9643	96.507	0.0885695	-0.716408	-0.243687	95.2085	0.178593	0.80455	0.617532	0	0	0	0	0.00980392
8455	ATRN	ATRN	attractin	HGNC:885	20p13	hDG09G14	human	NM_139321	25.3818	43.7142	28.7018	-1.65201	-0.894997	-1.40961	32.5993	-1.56959	0.0296464	0.184486	-1	0	-1	0	0.0196078
26033	ATRNL1	ATRNL1	attractin like 1	HGNC:29063	10q26	hDG09I14	human	NM_207303	70.6882	63.2919	45.7404	-0.0391009	-0.0907968	-0.773012	59.9068	-0.807107	0.263418	0.402507	0	0	0	0	0.0424837
546	ATRX	ATRX	ATRX, chromatin remodeler	HGNC:886	Xq21.1	hDG23E17	human	NM_000489	147.923	115.734	119.707	0.69493	-0.119028	0.210325	127.788	1.08828	0.131572	0.323355	0	0	0	0	0.0522876
546	ATRX	ATRX	ATRX, chromatin remodeler	HGNC:886	Xq21.1	DDRE19	human	NM_000489 NM_138270	114.667	126.952	113.878	-0.0272522	0.510631	0.156656	118.499	0.828915	0.250733	0.39564	0	0	0	0	0.0522876
4287	ATXN3	ATXN3	ataxin 3	HGNC:7106	14q21	hDG18P11	human	NM_030660	47.2418	59.6279	64.4485	-0.578135	0.69201	0.762468	57.1061	-0.88531	0.219932	0.379093	0	0	0	0	0.00980392
92552	ATXN3L	ATXN3L	ataxin 3 like	HGNC:24173	Xp22	hDG20J21	human	XM_045705	138.889	200.844	82.5906	0.829062	2.26874	0.47315	140.774	1.45089	0.0444132	0.216836	1	0	1	1	0.00326797
550	AUP1	AUP1	ancient ubiquitous protein 1	HGNC:891	2p13	hDG20H10	human	NM_012103	152.519	114.43	105.551	1.15226	0.306587	1.23824	124.167	0.987169	0.171367	0.349445	0	0	0	0	0.00653595
6790	AURKA	AURKA	aurora kinase A	HGNC:11393	20q13	K02O05	human	NM_198435	6.57514	28.7535	8.03614	-2.02347	-1.60192	-1.84656	14.4549	-2.07622	0.00401948	0.0760364	-1	-1	-1	-1	NA
9212	AURKB	AURKB	aurora kinase B	HGNC:11390	17p13.1	K01B09	human	NM_004217	79.5857	74.3961	70.1566	-0.883488	-0.62096	-0.993	74.7128	-0.393692	0.585397	0.551796	0	0	0	0	0.00980392
6795	AURKC	AURKC	aurora kinase C	HGNC:11391	19q13.43	K02L04	human	NM_001015879	14.6676	117.139	39.2297	-1.76117	0.590179	-0.939864	57.012	-0.887936	0.218598	0.378833	0	0	0	0	0.0163399
551	AVP	AVP	arginine vasopressin	HGNC:894	20p13	hDG09G18	human	NM_000490	80.2986	35.1885	33.1643	0.303032	-1.24521	-1.24288	49.5505	-1.09628	0.128764	0.320928	0	0	0	0	0.00326797
552	AVPR1A	AVPR1A	arginine vasopressin receptor 1A	HGNC:895	12q14.2	hDG08I07	human	NM_000706	66.2311	121.719	89.3792	-0.901688	0.748611	0.0853786	92.443	0.101374	0.888291	0.638086	0	0	0	0	0.0163399
553	AVPR1B	AVPR1B	arginine vasopressin receptor 1B	HGNC:896	1q32	hDG08K07	human	NM_000707	62.1317	159.219	65.0335	-1.04369	1.86041	-0.768407	95.4613	0.185651	0.797002	0.615361	0	0	0	0	0.0130719
554	AVPR2	AVPR2	arginine vasopressin receptor 2	HGNC:897	Xq28	hDG08D10	human	NM_000054	108.045	58.2188	122.489	0.546693	-1.13403	1.24653	96.2511	0.207703	0.773503	0.609644	0	0	0	0	0.00326797
8312	AXIN1	AXIN1	axin 1	HGNC:903	16p13.3	hDG10G11	human	NM_003502	41.0987	38.7477	86.3016	-0.748072	-0.968814	0.53777	55.3826	-0.933432	0.195885	0.365638	0	0	0	0	0.00980392
8313	AXIN2	AXIN2	axin 2	HGNC:904	17q24.1	hDG09H03	human	NM_004655	95.6753	54.4504	62.3732	0.850445	-0.453984	-0.151571	70.833	-0.502025	0.486666	0.514617	0	0	0	0	0.0163399
558	AXL	AXL	AXL receptor tyrosine kinase	HGNC:905	19q13.1	K01G16	human	NM_001699	92.2486	84.8309	138.21	-0.560492	-0.331892	0.711962	105.096	0.454686	0.528681	0.530626	0	0	0	0	0.0196078
51582	AZIN1	AZIN1	antizyme inhibitor 1	HGNC:16432	8q22.3	hDG01G07	human	NM_015878	66.8057	86.6645	51.0669	-0.119811	0.911001	-0.448264	68.179	-0.57613	0.424694	0.488718	0	0	0	0	0.00326797
113451	ADC	AZIN2	antizyme inhibitor 2	HGNC:29957	1p35.1	hDG22L09	human	NM_052998	108.506	165.546	109.887	0.337245	0.208771	1.00286	127.98	1.09363	0.129693	0.321633	0	0	0	0	NA
566	AZU1	AZU1	azurocidin 1	HGNC:913	19p13.3	hDG28A17	human	NM_001700	106.193	216.626	106.23	0.815663	2.34386	1.09339	143.016	1.51349	0.036006	0.199475	1	0	1	1	NA
2683	B4GALT1	B4GALT1	beta-1,4-galactosyltransferase 1	HGNC:924	9p13	hDG31C07	human	NM_001497	117.525	33.8157	62.5784	0.424876	-1.03047	-0.683794	71.3064	-0.488807	0.498226	0.518291	0	0	0	0	NA
23621	BACE1	BACE1	beta-secretase 1	HGNC:933	11q23-q24	hDG28C17	human	NM_012104	82.5475	152.066	182.055	0.156858	0.944287	3.62095	138.89	1.39826	0.0527083	0.230113	0	0	0	0	NA
25825	BACE2	BACE2	beta-site APP-cleaving enzyme 2	HGNC:934	21q22.3	hDG28E17	human	NM_012105	140.535	159.844	88.3387	1.7725	1.11291	0.496993	129.573	1.13811	0.114811	0.305862	0	0	0	0	0.00326797
571	BACH1	BACH1	BTB domain and CNC homolog 1	HGNC:935	21q22.1	hDG19L11	human	NM_001011545	69.6099	121.464	140.323	-0.820766	0.724453	1.03836	110.466	0.604609	0.402174	0.476397	0	0	0	0	0.00326797
60468	BACH2	BACH2	BTB domain and CNC homolog 2	HGNC:14078	6q15	hDG18O18	human	NM_021813	91.1786	102.553	82.0956	1.40154	2.8644	1.64224	91.9424	0.0873958	0.903612	0.641264	0	0	0	0	0.00980392
573	BAG1	BAG1	BCL2 associated athanogene 1	HGNC:937	9p12	hDG19C21	human	NM_004323	87.1986	102.163	52.2499	-0.316929	0.241484	-1.19811	80.5372	-0.231063	0.748841	0.605119	0	0	0	0	NA
7917	BAT3	BAG6	BCL2 associated athanogene 6	HGNC:13919	6p21.3	hDG20M09	human	NM_004639	60.6667	130.633	33.648	-1.02579	0.674491	-1.15771	74.9825	-0.38616	0.592615	0.553285	0	0	0	0	0.00653595
10458	BAIAP2	BAIAP2	BAI1 associated protein 2	HGNC:947	17q25.3	K02E22	human	NM_017451	59.7543	85.4108	79.553	-0.299774	-0.196726	0.232202	74.906	-0.388296	0.590549	0.552386	0	0	0	0	NA
55971	BAIAP2L1	BAIAP2L1	BAI1 associated protein 2 like 1	HGNC:21649	7q22.1	hDG05G18	human	NM_018842	64.066	122.16	52.9059	-0.979618	0.837019	-0.562076	79.7106	-0.254141	0.724733	0.59778	0	0	0	0	0.00653595
578	BAK1	BAK1	BCL2 antagonist/killer 1	HGNC:949	6p21.31	hDG09I03	human	NM_001188	93.4786	46.8719	56.288	0.772243	-0.765288	-0.378927	65.5462	-0.649643	0.368036	0.461292	0	0	0	0	NA
140836	C20ORF179	BANF2	barrier to autointegration factor 2	HGNC:16172	20p12.1	hDG23G19	human	NM_001014977	233.533	114.106	95.7098	2.88873	-0.158704	-0.413398	147.783	1.64659	0.0225395	0.165131	1	0	1	1	NA
8314	BAP1	BAP1	BRCA1 associated protein 1	HGNC:950	3p21.1	hDG19M16	human	NM_004656	142.801	80.1997	94.1896	1.27584	-0.308101	-0.133123	105.73	0.472382	0.512766	0.524475	0	0	0	0	0.00980392
580	BARD1	BARD1	BRCA1 associated RING domain 1	HGNC:952	2q35	hDG19J05	human	NM_000465	71.8794	107.488	116.557	-0.755755	0.374717	0.434869	98.6415	0.274448	0.703734	0.590696	0	0	0	0	0.00980392
581	BAX	BAX	BCL2 associated X, apoptosis regulator	HGNC:959	19q13.3-q13.4	hDG09F20	human	NM_138764	55.0369	34.2412	57.0994	-0.596289	-1.28413	-0.348613	48.7925	-1.11744	0.121541	0.311753	0	0	0	0	0.00653595
11177	BAZ1A	BAZ1A	bromodomain adjacent to zinc finger domain 1A	HGNC:960	14q13.2	hDG20D18	human	NM_013448	103.926	161.688	51.7749	0	1.37964	-0.553686	105.796	0.474224	0.511143	0.524013	0	0	0	0	0.0130719
9031	BAZ1B	BAZ1B	bromodomain adjacent to zinc finger domain 1B	HGNC:961	7q11.23	hDG18F03	human	NM_023005	47.6306	32.9727	42.0956	-0.560616	-0.656972	-0.351908	40.8996	-1.33783	0.0637838	0.244346	0	0	0	0	0.00980392
11176	BAZ2A	BAZ2A	bromodomain adjacent to zinc finger domain 2A	HGNC:962	12q13.3	hDG19M05	human	NM_013449	128.05	59.5674	143.818	0.853271	-0.824378	1.12711	110.478	0.604962	0.401907	0.476325	0	0	0	0	0.00653595
29994	BAZ2B	BAZ2B	bromodomain adjacent to zinc finger domain 2B	HGNC:963	2q24.2	hDG19C10	human	NM_013450	46.9149	58.2363	26.3871	-1.47088	-0.857686	-1.85485	43.8461	-1.25556	0.0819127	0.2716	0	0	0	0	0.0424837
8424	BBOX1	BBOX1	gamma-butyrobetaine hydroxylase 1	HGNC:964	11p	hDG25C13	human	NM_003986	275.252	131.598	66.782	2.59277	0.659502	-0.8937	157.877	1.92844	0.00755812	0.104588	1	0	1	1	0.00326797
4059	BCAM	BCAM	basal cell adhesion molecule (Lutheran blood group)	HGNC:6722	19q13.32	hDG05K04	human	NM_005581	70.6629	107.62	53.9166	-0.770847	0.414446	-0.529957	77.3997	-0.318667	0.658813	0.57744	0	0	0	0	0.00653595
63827	BCAN	BCAN	brevican	HGNC:23059	1q31	hDG02E10	human	NM_021948	106.801	106.582	59.2665	1.88147	1.90327	0.210167	90.8831	0.0578164	0.936148	0.64799	0	0	0	0	0.0196078
9564	BCAR1	BCAR1	BCAR1, Cas family scaffolding protein	HGNC:971	16q23.1	hDG03E14	human	NM_014567	45.0148	39.8656	48.9571	-0.418434	-0.86257	-0.324519	44.6125	-1.23416	0.0872558	0.278522	0	0	0	0	0.00653595
586	BCAT1	BCAT1	branched chain amino acid transaminase 1	HGNC:976	12p12.1	hDG31G20	human	NM_005504	149.049	113.024	148.051	1.03032	0.187359	1.13966	136.708	1.33735	0.0638809	0.244346	0	0	0	0	NA
587	BCAT2	BCAT2	branched chain amino acid transaminase 2	HGNC:977	19q13.33	hDG31I20	human	NM_001190	35.1193	34.425	76.097	-1.15779	-1.0211	-0.395391	48.5471	-1.1243	0.119277	0.309022	0	0	0	0	0.00326797
56647	BCCIP	BCCIP	BRCA2 and CDKN1A interacting protein	HGNC:978	10q26.2	hDG01C17	human	NM_016567	60.485	68.5239	65.633	-0.439306	-0.00875962	0.356098	64.8806	-0.668227	0.354487	0.454334	0	0	0	0	0.00326797
590	BCHE	BCHE	butyrylcholinesterase	HGNC:983	3q26.1-q26.2	hDG11C05	human	NM_000055	76.4863	52.5079	31.9049	0.452131	0.00899321	-1.24334	53.633	-0.982285	0.173495	0.351349	0	0	0	0	0.0163399
593	BCKDHA	BCKDHA	branched chain keto acid dehydrogenase E1, alpha polypeptide	HGNC:986	19q13.1-q13.2	hDG25H04	human	NM_000709	220.798	87.0899	112.457	1.59031	-0.509615	0.219209	140.115	1.43248	0.0471905	0.219726	1	0	1	0	0.00326797
10295	BCKDK	BCKDK	branched chain ketoacid dehydrogenase kinase	HGNC:16902	16p11.2	K03I15	human	NM_005881	116.604	48.9892	92.172	0.345471	-0.977523	-0.0082255	85.9217	-0.0807141	0.910951	0.642426	0	0	0	0	0.00653595
8915	BCL10	BCL10	B-cell CLL/lymphoma 10	HGNC:989	1p22	hDG01D15	human	NM_003921	69.7904	70.9427	52.7359	0.0310621	0.113875	-0.356098	64.4897	-0.679144	0.346681	0.450898	0	0	0	0	0.00326797
596	BCL2	BCL2	BCL2, apoptosis regulator	HGNC:990	18q21.3	hDG09K03	human	NM_000633	18.2427	32.0308	46.9574	-1.90617	-1.37492	-0.727541	32.4103	-1.57487	0.029103	0.184456	-1	0	-1	0	0.00326797
597	BCL2A1	BCL2A1	BCL2 related protein A1	HGNC:991	15q24.3	hDG09M03	human	NM_004049	49.2706	32.9781	38.8438	-0.801569	-1.33601	-1.03068	40.3642	-1.35278	0.060875	0.238478	0	0	0	0	0.00326797
598	BCL2L1	BCL2L1	BCL2 like 1	HGNC:992	20q11.21	hDG09O03	human	NM_001191	24.5581	25.3996	48.9858	-1.68134	-1.64731	-0.651755	32.9812	-1.55893	0.0307723	0.18782	-1	0	-1	0	0.00326797
598	BCL2L1	BCL2L1	BCL2 like 1	HGNC:992	20q11.21	DDRF05	human	NM_001191 NM_138578	95.9695	50.3778	148.619	-0.361091	-1.08223	0.957342	98.3222	0.265534	0.712936	0.593798	0	0	0	0	0.00326797
10017	BCL2L10	BCL2L10	BCL2 like 10	HGNC:993	15q21	hDG09H20	human	NM_020396	135.765	69.923	72.1095	2.27763	0.181594	0.212199	92.599	0.10573	0.883526	0.637527	0	0	0	0	NA
10018	BCL2L11	BCL2L11	BCL2 like 11	HGNC:994	2q13	hDG01J07	human	NM_138623	67.1568	42.2633	60.9294	-0.102061	-1.34022	0.0963558	56.7831	-0.894327	0.215272	0.377167	0	0	0	0	0.00326797
23786	BCL2L13	BCL2L13	BCL2 like 13	HGNC:17164	22q11	hDG01B11	human	NM_015367	75.7599	78.3717	87.9374	0.332808	0.490539	1.58778	80.6897	-0.226805	0.753314	0.606409	0	0	0	0	0.00326797
79370	BCL2L14	BCL2L14	BCL2 like 14	HGNC:16657	12p13-p12	hDG09A05	human	NM_138724	81.3969	111.289	123.631	0.342133	1.88079	2.13715	105.439	0.464245	0.520047	0.528442	0	0	0	0	0.00326797
599	BCL2L2	BCL2L2	BCL2 like 2	HGNC:995	14q11.2-q12	hDG09C05	human	NM_004050	87.1632	42.1354	52.6369	0.547413	-0.959852	-0.515341	60.6452	-0.786491	0.275813	0.412113	0	0	0	0	NA
602	BCL3	BCL3	B-cell CLL/lymphoma 3	HGNC:998	19q13.32	hDG01E07	human	NM_005178	45.0346	48.4829	58.6534	-1.2203	-1.02488	-0.0293257	50.7236	-1.06352	0.14058	0.332287	0	0	0	0	0.00326797
604	BCL6	BCL6	B-cell CLL/lymphoma 6	HGNC:1001	3q27	hDG19H17	human	NM_001706	148.475	94.1764	94.1896	1.43837	0.0416352	-0.133123	112.28	0.655276	0.363902	0.460168	0	0	0	0	0.00653595
255877	BCL6B	BCL6B	B-cell CLL/lymphoma 6B	HGNC:1002	17p13.1	hDG20C14	human	NM_181844	64.8148	123.207	107.364	-0.927425	0.505868	1.29865	98.4619	0.269433	0.708901	0.592355	0	0	0	0	0.00326797
605	BCL7A	BCL7A	BCL tumor suppressor 7A	HGNC:1004	12q24.1	hDG01M09	human	NM_001024808	81.7294	58.6762	75.799	0.634554	-0.508058	0.917475	72.0682	-0.467536	0.51709	0.526797	0	0	0	0	NA
613	BCR	BCR	BCR, RhoGEF and GTPase activating protein	HGNC:1014	22q11	K01J09	human	NM_021574	160.405	107.633	147.558	1.17798	0.299774	0.946161	138.532	1.38828	0.0544111	0.231499	0	0	0	0	0.00326797
613	BCR	BCR	BCR, RhoGEF and GTPase activating protein	HGNC:1014	22q11	hDG04E03	human	NM_021574	23.0303	40.3054	41.0286	-1.06283	-0.70999	-1.10875	34.7881	-1.50848	0.0366078	0.199494	-1	0	-1	0	0.00326797
617	BCS1L	BCS1L	BCS1 homolog, ubiquinol-cytochrome c reductase complex chaperone	HGNC:1020	2q35	hDG03J07	human	NM_004328	17.4526	60.3688	76.2335	-1.655	0.20105	0.757211	51.3516	-1.04599	0.147252	0.336256	0	0	0	0	0.00980392
622	BDH1	BDH1	3-hydroxybutyrate dehydrogenase, type 1	HGNC:1027	3q29	hDG25B15	human	NM_203315	67.521	113.338	111.765	-1.23141	0.179864	0.202347	97.5413	0.243728	0.735576	0.60121	0	0	0	0	0.00326797
56898	BDH2	BDH2	3-hydroxybutyrate dehydrogenase, type 2	HGNC:32389	4q24	hDG25D15	human	NM_020139	243.655	137.304	156.747	2.0111	0.809389	1.29839	179.236	2.52481	0.00046923	0.0241786	1	0	1	1	0.00326797
623	BDKRB1	BDKRB1	bradykinin receptor B1	HGNC:1029	14q32.1-q32.2	hDG08P19	human	NM_000710	74.8399	77.7188	80.6147	-0.603492	-0.555899	-0.221984	77.7244	-0.3096	0.667925	0.579593	0	0	0	0	0.00326797
624	BDKRB2	BDKRB2	bradykinin receptor B2	HGNC:1030	14q32.2	hDG08C09	human	NM_000623	71.1504	81.2188	141.966	-0.73129	-0.452131	1.92956	98.1117	0.259656	0.719012	0.596715	0	0	0	0	NA
627	BDNF	BDNF	brain derived neurotrophic factor	HGNC:1033	11p14.1	hDG09C18	human	NM_170731	147.572	126.446	68.8641	2.69796	2.5034	0.0909426	114.294	0.711495	0.324214	0.441443	0	0	0	0	0.00653595
8678	BECN1	BECN1	beclin 1	HGNC:1034	17q21	hDG04L09	human	NM_003766	97.3737	80.9485	78.0348	0.347465	0.958487	0.378824	85.4523	-0.0938208	0.896564	0.639866	0	0	0	0	0.00326797
7439	VMD2	BEST1	bestrophin 1	HGNC:12703	11q12	hDG12P15	human	NM_004183	107.45	94.2901	152.652	0.992465	-0.168623	1.95055	118.13	0.818623	0.256675	0.399094	0	0	0	0	NA
54831	VMD2L1	BEST2	bestrophin 2	HGNC:17107	19p13.13	hDG12B17	human	NM_017682	44.3831	63.0144	57.0286	-0.934651	-0.809389	-0.638032	54.8087	-0.949457	0.188312	0.361491	0	0	0	0	0.00653595
144453	VMD2L3	BEST3	bestrophin 3	HGNC:17105	12q15	hDG12F17	human	NM_032735	82.2231	131.327	71.8434	0.221618	0.590179	-0.236983	95.1312	0.176435	0.806866	0.618082	0	0	0	0	0.0196078
144453	VMD2L3	BEST3	bestrophin 3	HGNC:17105	12q15	hDG13D13	human	NM_152439	66.7056	109.267	82.6525	0	1.16562	0.283593	86.2085	-0.0727078	0.919752	0.644929	0	0	0	0	0.0196078
266675	VMD2L2	BEST4	bestrophin 4	HGNC:17106	1p34.1	hDG12D17	human	NM_153274	169.886	144.496	94.7391	2.90031	0.859976	0.382819	136.374	1.32801	0.065765	0.247146	0	0	0	0	0.00326797
51283	BFAR	BFAR	bifunctional apoptosis regulator	HGNC:17613	16p13.2	hDG18I16	human	NM_016561	25.8566	18.4336	40.3309	-1.54169	-1.39278	-0.439885	28.207	-1.69223	0.019043	0.155103	-1	0	-1	0	NA
635	BHMT	BHMT	betaine--homocysteine S-methyltransferase	HGNC:1047	5q14.1	hDG31E07	human	NM_001713	105.358	125.819	170.292	0.191194	0.384085	1.61413	133.823	1.25678	0.0816207	0.271145	0	0	0	0	NA
637	BID	BID	BH3 interacting domain death agonist	HGNC:1050	22q11.2	hDG01K12	human	NM_001196	55.0422	78.0261	71.7022	-0.714428	0.473019	0.691248	68.2569	-0.573956	0.426442	0.49005	0	0	0	0	0.00653595
638	BIK	BIK	BCL2 interacting killer	HGNC:1051	22q13.31	hDG01M12	human	NM_001197	41.172	54.357	50.9151	-1.41554	-0.727048	-0.456643	48.8147	-1.11682	0.121747	0.311826	0	0	0	0	0.00326797
274	BIN1	BIN1	bridging integrator 1	HGNC:1052	2q14	hDG22D13	human	NM_139348	93.4637	187.07	93.2641	-0.193916	0.497838	0.195247	124.599	0.999248	0.166211	0.346968	0	0	0	0	0.00326797
55909	BIN3	BIN3	bridging integrator 3	HGNC:1054	8p21.2	hDG22F13	human	NM_018688	87.2556	447.758	73.7185	-0.413126	3.99877	-0.754365	202.911	3.18587	1.03965e-05	0.00192857	1	1	1	1	0.00653595
329	BIRC2	BIRC2	baculoviral IAP repeat containing 2	HGNC:590	11q22	hDG19N15	human	NM_001166	72.4468	49.584	98.3836	-0.739502	-1.07419	-0.0266246	73.4715	-0.428353	0.552822	0.54107	0	0	0	0	0.00326797
330	BIRC3	BIRC3	baculoviral IAP repeat containing 3	HGNC:591	11q22	hDG19L15	human	NM_001165	38.4043	137.438	108.17	-1.71467	1.12415	0.221872	94.6705	0.163569	0.820707	0.621296	0	0	0	0	0.00326797
332	BIRC5	BIRC5	baculoviral IAP repeat containing 5	HGNC:593	17q25.3	hDG04P09	human	NM_001012271	11.1785	64.7345	45.8555	-1.28766	0.292871	-0.91472	40.5895	-1.34649	0.0620894	0.240152	0	0	0	0	NA
57448	BIRC6	BIRC6	baculoviral IAP repeat containing 6	HGNC:13516	2p22.3	hDG18G14	human	NM_016252	70.1823	63.0896	47.3897	0.4555	0.867202	-0.0879771	60.2205	-0.798348	0.268634	0.406293	0	0	0	0	0.0457516
79444	BIRC7	BIRC7	baculoviral IAP repeat containing 7	HGNC:13702	20q13.3	hDG19G11	human	NM_022161	151.312	158.735	33.377	1.51964	1.65708	-1.67735	114.475	0.71655	0.320826	0.439652	0	0	0	0	0.00326797
112401	BIRC8	BIRC8	baculoviral IAP repeat containing 8	HGNC:14878	19q13.42	hDG19L10	human	NM_033341	75.2837	142.762	154.303	-0.658238	1.25738	1.39336	124.116	0.985761	0.171991	0.350139	0	0	0	0	NA
10904	BLCAP	BLCAP	bladder cancer associated protein	HGNC:1055	20q11.23	hDG01K11	human	NM_006698	73.653	75.9529	85.6615	0.226309	0.367904	1.46209	78.4225	-0.29011	0.687691	0.586141	0	0	0	0	NA
640	BLK	BLK	BLK proto-oncogene, Src family tyrosine kinase	HGNC:1057	8p23-p22	K03G13	human	NM_001715	98.5589	97.5067	138.037	0.049353	-0.0977523	0.847226	111.368	0.629792	0.382851	0.468523	0	0	0	0	0.00326797
641	BLM	BLM	Bloom syndrome RecQ like helicase	HGNC:1058	15q26.1	hDG23G17	human	NM_000057	157.494	160.766	80.0837	0.940199	0.978673	-0.819543	132.781	1.22771	0.0889361	0.280384	0	0	0	0	0.0130719
641	BLM	BLM	Bloom syndrome RecQ like helicase	HGNC:1058	15q26.1	DDRL07	human	NM_000057	142.523	116.327	87.0663	0.4701	0.289612	-0.461265	115.306	0.739745	0.305364	0.43083	0	0	0	0	0.0130719
642	BLMH	BLMH	bleomycin hydrolase	HGNC:1059	17q11.2	hDG28G17	human	NM_000386	58.3392	119.397	48.722	-0.517632	0.236072	-0.823589	75.4861	-0.372099	0.606148	0.558951	0	0	0	0	0.00326797
29760	BLNK	BLNK	B-cell linker	HGNC:14211	10q23.2-q23.33	hDG09J07	human	NM_013314	70.139	47.5035	50.2028	-0.0586514	-0.739346	-0.606284	55.9484	-0.917634	0.203553	0.371356	0	0	0	0	0.00653595
648	BMI1	BMI1	BMI1 proto-oncogene, polycomb ring finger	HGNC:1066	10p13	hDG20G14	human	NM_005180	116.37	43.5443	86.216	0.29509	-1.30299	0.593955	82.0436	-0.189001	0.793413	0.613963	0	0	0	0	0.00653595
649	BMP1	BMP1	bone morphogenetic protein 1	HGNC:1067	8p21	hDG09K11	human	NM_006129	27.0293	23.505	48.1744	-1.59336	-1.72514	-0.682069	32.9029	-1.56111	0.0305387	0.187086	-1	0	-1	0	NA
27302	BMP10	BMP10	bone morphogenetic protein 10	HGNC:20869	2p13.2	hDG09J18	human	NM_014482	62.7252	118.867	76.572	-0.322583	2.19209	0.378927	86.0548	-0.0769985	0.915034	0.643902	0	0	0	0	0.00326797
9210	BMP15	BMP15	bone morphogenetic protein 15	HGNC:1068	Xp11.2	hDG09H17	human	NM_005448	75.3561	55.7134	80.6288	0.127078	-0.4021	0.530498	70.5661	-0.509476	0.480219	0.511428	0	0	0	0	0.00326797
650	BMP2	BMP2	bone morphogenetic protein 2	HGNC:1069	20p12	hDG09J17	human	NM_001200	81.9461	71.5019	92.7992	0.361683	0.246449	0.985211	82.0824	-0.187917	0.794565	0.614547	0	0	0	0	0.00980392
55589	BMP2K	BMP2K	BMP2 inducible kinase	HGNC:18041	4q21.21	K03I17	human	NM_198892	58.4586	64.0836	41.8964	-0.608687	-0.703816	-0.945932	54.8129	-0.949341	0.188366	0.361491	0	0	0	0	0.00653595
651	BMP3	BMP3	bone morphogenetic protein 3	HGNC:1070	4q21	hDG09L17	human	NM_001201	107.757	98.658	101.318	1.28055	1.36195	1.30351	102.578	0.384359	0.59432	0.55398	0	0	0	0	NA
652	BMP4	BMP4	bone morphogenetic protein 4	HGNC:1071	14q22-q23	hDG09N17	human	NM_001202	81.9461	52.5558	61.9675	0.361683	-0.53181	-0.166728	65.4898	-0.651218	0.366872	0.46083	0	0	0	0	0.00653595
653	BMP5	BMP5	bone morphogenetic protein 5	HGNC:1072	6p12.1	hDG10G15	human	NM_021073	42.7263	36.1788	84.5835	-0.686754	-1.04239	0.473966	54.4962	-0.958183	0.184291	0.359703	0	0	0	0	0.00653595
654	BMP6	BMP6	bone morphogenetic protein 6	HGNC:1073	6p24-p23	hDG10I15	human	NM_001718	81.4649	77.2812	57.831	0.772599	0.134898	-0.51954	72.1924	-0.464068	0.520204	0.528453	0	0	0	0	0.00653595
655	BMP7	BMP7	bone morphogenetic protein 7	HGNC:1074	20q13	hDG09P17	human	NM_001719	103.364	100.237	140.264	1.12415	1.42681	2.75859	114.621	0.720642	0.318019	0.437764	0	0	0	0	0.00653595
657	BMPR1A	BMPR1A	bone morphogenetic protein receptor type 1A	HGNC:1076	10q22.3	K01L09	human	NM_004329	104.912	140.87	110.54	-0.237497	1.22051	0.0187359	118.774	0.836582	0.246381	0.393025	0	0	0	0	NA
658	BMPR1B	BMPR1B	bone morphogenetic protein receptor type 1B	HGNC:1077	4q23-q24	K01O10	human	NM_001203	113.478	66.2802	83.6177	-0.0189997	-0.84579	-0.655755	87.7918	-0.0284969	0.968503	0.655497	0	0	0	0	0.00326797
659	BMPR2	BMPR2	bone morphogenetic protein receptor type 2	HGNC:1078	2q33-q34	K01A12	human	NM_001204	91.8762	73.6232	81.0002	-0.569992	-0.642372	-0.72133	82.1665	-0.185568	0.797077	0.615361	0	0	0	0	0.00980392
660	BMX	BMX	BMX non-receptor tyrosine kinase	HGNC:1079	Xp22.2	K02D20	human	NM_203281	51.6618	99.0085	76.5097	-0.562076	0.140519	0.143744	75.7267	-0.365382	0.612657	0.561728	0	0	0	0	0.0130719
149428	BNIPL	BNIPL	BCL2 interacting protein like	HGNC:16976	1q21.2	hDG01L07	human	NM_138278	52.4086	57.8123	40.5974	-0.847551	-0.551856	-1.0264	50.2728	-1.07611	0.135942	0.327076	0	0	0	0	NA
91653	BOC	BOC	BOC cell adhesion associated, oncogene regulated	HGNC:17173	3q13.2	hDG05K21	human	NM_033254	71.1703	73.5058	68.5723	-0.754787	-0.576974	-0.0642372	71.0828	-0.495049	0.492737	0.51645	0	0	0	0	0.0196078
666	BOK	BOK	BOK, BCL2 family apoptosis regulator	HGNC:1087	2q37.3	hDG09E05	human	NM_032515	34.4431	32.0308	48.9858	-1.32943	-1.37492	-0.651755	38.4866	-1.40521	0.0515302	0.228464	0	0	0	0	NA
66037	BOLL	BOLL	boule homolog, RNA binding protein	HGNC:14273	2q33	hDG23I17	human	NM_197970	131.971	85.8935	132.543	0.286148	-0.84642	0.543944	116.802	0.781539	0.278849	0.413808	0	0	0	0	0.00326797
669	BPGM	BPGM	bisphosphoglycerate mutase	HGNC:1093	7q33	hDG27O16	human	NM_001724	84.667	115.501	90.0386	0	-0.0297569	-0.388063	96.7357	0.221234	0.759185	0.608002	0	0	0	0	NA
670	BPHL	BPHL	biphenyl hydrolase like	HGNC:1094	6p25	hDG11E05	human	NM_004332	40.0643	48.8392	81.4466	-0.807907	-0.134898	0.78826	56.7834	-0.894321	0.215278	0.377167	0	0	0	0	NA
671	BPI	BPI	bactericidal/permeability-increasing protein	HGNC:1095	20q11.23	hDG30A05	human	NM_001725	36.263	53.6451	47.4178	-0.937964	-1.2002	-1.4614	45.7753	-1.20169	0.0958992	0.286389	0	0	0	0	0.00653595
51297	PLUNC	BPIFA1	BPI fold containing family A member 1	HGNC:15749	20q11.21	hDG12P16	human	NM_016583	137.091	90.1749	112.921	1.89821	-0.252934	0.875015	113.396	0.686416	0.341548	0.447694	0	0	0	0	0.00653595
92747	C20ORF114	BPIFB1	BPI fold containing family B member 1	HGNC:16108	20q11.21	hDG13H17	human	NM_033197	48.0401	72.0039	160.005	-0.674491	-0.0916784	3.15018	93.3497	0.126691	0.860659	0.630342	0	0	0	0	0.00980392
254240	BPIL2	BPIFC	BPI fold containing family C	HGNC:16503	22q12.3	hDG30C05	human	NM_174932	100.286	157.024	116.971	0.242395	1.81517	0.700433	124.76	1.00375	0.164291	0.346129	0	0	0	0	0.00653595
10380	BPNT1	BPNT1	3'(2'), 5'-bisphosphate nucleotidase 1	HGNC:1096	1q42	hDG27O22	human	NM_006085	83.8815	103.637	111.926	-0.025942	-0.238056	-0.0277188	99.8147	0.307208	0.67034	0.580962	0	0	0	0	0.00326797
2186	FALZ	BPTF	bromodomain PHD finger transcription factor	HGNC:3581	17q24	hDG19E21	human	NM_004459	108.191	41.5973	80.9087	0.284424	-1.27404	-0.470369	76.8992	-0.332644	0.644859	0.573128	0	0	0	0	0.0130719
673	BRAF	BRAF	B-Raf proto-oncogene, serine/threonine kinase	HGNC:1097	7q34	K02F10	human	NM_004333	88.6561	69.5467	62.815	0.637019	-0.590179	-0.254316	73.6726	-0.422736	0.558036	0.542706	0	0	0	0	0.0130719
8315	BRAP	BRAP	BRCA1 associated protein	HGNC:1099	12q24.12	hDG18D22	human	NM_006768	94.678	56.5123	59.7426	1.55921	0.534337	0.527862	70.311	-0.5166	0.474105	0.508718	0	0	0	0	NA
672	BRCA1	BRCA1	BRCA1, DNA repair associated	HGNC:1100	17q21.31	DDRB15	human	NM_007294 NM_007297 NM_007298 NM_007299 NM_007300 NR_027676	87.5745	77.4903	48.1709	-0.510978	-0.518253	-1.35768	71.0786	-0.495168	0.492637	0.51645	0	0	0	0	0.0228758
672	BRCA1	BRCA1	BRCA1, DNA repair associated	HGNC:1100	17q21.31	hDG20D10	human	NM_007294	34	73.9241	82.5906	-1.65812	-0.613173	0.47315	63.5049	-0.706641	0.327514	0.442484	0	0	0	0	0.0228758
675	BRCA2	BRCA2	BRCA2, DNA repair associated	HGNC:1101	13q13.1	DDRM15	human	NM_000059	124.97	169.086	113.5	0.1567	1.38709	0.147953	135.852	1.31345	0.0687771	0.252739	0	0	0	0	0.0326797
675	BRCA2	BRCA2	BRCA2, DNA repair associated	HGNC:1101	13q13.1	hDG23P21	human	NM_000059	156.431	82.0956	99.6163	0.912947	-0.938997	-0.311861	112.714	0.66739	0.355107	0.454484	0	0	0	0	0.0326797
23774	BRD1	BRD1	bromodomain containing 1	HGNC:1102	22q13.33	hDG20J22	human	NM_014577	75.4815	98.2278	43.9199	-0.674491	-0.0613173	-0.815429	72.5431	-0.454275	0.529052	0.530716	0	0	0	0	0.00653595
6046	BRD2	BRD2	bromodomain containing 2	HGNC:1103	6p21.3	K01J19	human	NM_005104	85.1723	77.4879	136.714	-0.74099	-0.53531	0.674491	99.7915	0.306558	0.671003	0.58121	0	0	0	0	0.00326797
8019	BRD3	BRD3	bromodomain containing 3	HGNC:1104	9q34	K02C15	human	NM_007371	93.2803	88.8102	46.077	0.786906	-0.112415	-0.740834	76.0559	-0.356191	0.621626	0.565036	0	0	0	0	0.00326797
23476	BRD4	BRD4	bromodomain containing 4	HGNC:13575	19p13.12	hDG23K17	human	NM_014299	87.8365	162.937	123.614	-0.844817	1.03157	0.311861	124.796	1.00473	0.163885	0.346129	0	0	0	0	0.0130719
23476	BRD4	BRD4	bromodomain containing 4	HGNC:13575	19p13.12	K01F16	human	NM_014299	131.727	74.0097	183.828	0.446494	-0.631666	1.85485	129.855	1.146	0.112333	0.304543	0	0	0	0	0.0130719
29117	BRD7	BRD7	bromodomain containing 7	HGNC:14310	16q12.1	hDG23M17	human	NM_013263	166.534	118.989	87.8968	1.17184	-0.0396759	-0.61647	124.473	0.99573	0.167693	0.347646	0	0	0	0	NA
65980	BRD9	BRD9	bromodomain containing 9	HGNC:25818	5p15.33	hDG23O17	human	NM_023924	177.7	126.043	90.1291	1.45799	0.132253	-0.558449	131.291	1.18608	0.100306	0.291112	0	0	0	0	0.00326797
676	BRDT	BRDT	bromodomain testis associated	HGNC:1105	1p22.1	K03K17	human	NM_207189	30.3885	47.9111	32.194	-1.06931	-0.997073	-1.12689	36.8312	-1.45143	0.0443175	0.216836	-1	0	-1	0	0.0130719
9577	BRE	BRE	brain and reproductive organ-expressed (TNFRSF1A modulator)	HGNC:1106	2p23	hDG01O12	human	NM_199193	54.8667	90.9837	49.3978	-0.723303	1.12999	-0.54043	65.0827	-0.662584	0.358571	0.45646	0	0	0	0	0.00653595
83990	BRIP1	BRIP1	BRCA1 interacting protein C-terminal helicase 1	HGNC:20473	17q23.2	DDRI07	human	NM_032043	182.208	211.221	121.053	1.17866	2.26355	0.322015	171.494	2.30864	0.00138178	0.0434495	1	0	1	1	0.0130719
83990	BRIP1	BRIP1	BRCA1 interacting protein C-terminal helicase 1	HGNC:20473	17q23.2	hDG23A19	human	NM_032043	89.9634	83.7233	107.987	-0.790312	-0.899321	-0.0942837	93.8914	0.141816	0.844214	0.626002	0	0	0	0	0.0130719
7862	BRPF1	BRPF1	bromodomain and PHD finger containing 1	HGNC:14255	3p26-p25	hDG19H07	human	NM_001003694	142.801	58.9018	113.062	1.27584	-0.841032	0.34612	104.922	0.449812	0.533118	0.531804	0	0	0	0	0.00980392
27154	BRPF3	BRPF3	bromodomain and PHD finger containing 3	HGNC:14256	6p21.31	hDG18A10	human	NM_015695	101.288	47.5119	83.8603	1.85704	0.0788366	1.73022	77.5534	-0.314377	0.663121	0.578342	0	0	0	0	0.0130719
680	BRS3	BRS3	bombesin receptor subtype 3	HGNC:1113	Xq26.3	hDG08E09	human	NM_001727	90.4176	170.219	107.395	-0.0638991	2.18654	0.71718	122.677	0.945576	0.190142	0.363247	0	0	0	0	0.00653595
84446	BRSK1	BRSK1	BR serine/threonine kinase 1	HGNC:18994	19q13.4	hDG19F04	human	NM_032430	94.0071	112.812	94.8886	-0.121896	0.50795	-0.115373	100.569	0.328275	0.6492	0.574889	0	0	0	0	0.0130719
84446	BRSK1	BRSK1	BR serine/threonine kinase 1	HGNC:18994	19q13.4	K02P13	human	NM_032430	107.153	171.53	87.922	1.23657	1.93916	0.475461	122.202	0.932299	0.196441	0.365717	0	0	0	0	0.0130719
9024	BRSK2	BRSK2	BR serine/threonine kinase 2	HGNC:11405	11p15.5	K01J05	human	NM_003957	97.8352	118.068	128.862	-0.417994	0.588841	0.477764	114.922	0.729024	0.31242	0.434565	0	0	0	0	0.00653595
682	BSG	BSG	basigin (Ok blood group)	HGNC:1116	19p13.3	hDG01G09	human	NM_198590	52.2331	63.5137	62.2949	-0.856426	-0.262789	0.171765	59.3472	-0.822732	0.254285	0.397726	0	0	0	0	NA
683	BST1	BST1	bone marrow stromal cell antigen 1	HGNC:1118	4p15	hDG11G05	human	NM_004334	81.6283	48.3806	61.6299	0.630019	-0.152885	-0.0243792	63.8796	-0.696178	0.334723	0.44491	0	0	0	0	0.00653595
53339	BTBD1	BTBD1	BTB domain containing 1	HGNC:1120	15q24	hDG19O11	human	NM_025238	75.8511	60.2329	146.614	-0.641985	-0.807724	1.19811	94.2328	0.151347	0.833899	0.623826	0	0	0	0	0.00980392
84280	BTBD10	BTBD10	BTB domain containing 10	HGNC:21445	11p15.2	hDG19L21	human	NM_032320	42.3759	88.1864	31.28	-1.6009	-0.108252	-1.7306	53.9474	-0.973506	0.177374	0.35456	0	0	0	0	0.00653595
121551	BTBD11	BTBD11	BTB domain containing 11	HGNC:23844	12q24.11	hDG19B15	human	NM_001018072	63.3688	80.8652	113.761	-0.999547	-0.291447	0.36387	85.9985	-0.0785709	0.913305	0.6433	0	0	0	0	0.00653595
55643	BTBD2	BTBD2	BTB domain containing 2	HGNC:15504	19p13.3	hDG18E03	human	NM_017797	64.7388	26.3955	35.0368	0.210231	-0.989837	-0.703816	42.057	-1.30551	0.0704666	0.254678	0	0	0	0	0.00653595
22903	BTBD3	BTBD3	BTB domain containing 3	HGNC:15854	20p12.2	hDG19O13	human	NM_181443	156.986	79.5341	37.571	1.68216	-0.324755	-1.57085	91.3636	0.0712355	0.921377	0.645067	0	0	0	0	0.00980392
90135	BTBD6	BTBD6	BTB domain containing 6	HGNC:19897	14q32.33	hDG19H10	human	NM_033271	105.922	87.5208	143.119	0.219413	-0.124906	1.10936	112.187	0.652679	0.365804	0.460458	0	0	0	0	0.00326797
55727	BTBD7	BTBD7	BTB domain containing 7	HGNC:18269	14q32.13	hDG19F07	human	NM_001002860	103.652	98.8353	106.772	0.154401	0.158214	0.186372	103.086	0.398561	0.580767	0.55022	0	0	0	0	0.00980392
284697	BTBD8	BTBD8	BTB domain containing 8	HGNC:21019	1p22.1	hDG20D13	human	NM_183242	109.852	136.034	74.1314	0.140519	0.797125	0.191273	106.672	0.498688	0.489573	0.515654	0	0	0	0	0.00653595
114781	BTBD9	BTBD9	BTB domain containing 9	HGNC:21228	6p21	hDG20M21	human	NM_152733	65.4074	39.4937	31.8353	-0.913373	-1.39497	-1.21811	45.5788	-1.20718	0.0943943	0.285981	0	0	0	0	0.00326797
685	BTC	BTC	betacellulin	HGNC:1121	4q13.3	hDG09J04	human	NM_001729	47.3485	55.0819	94.8276	-0.869995	-0.428042	1.061	65.7527	-0.643878	0.372302	0.463718	0	0	0	0	0.00653595
686	BTD	BTD	biotinidase	HGNC:1122	3p25	hDG11I05	human	NM_000060	52.0621	42.8776	79.8613	-0.392835	-0.368722	0.723249	58.267	-0.852894	0.237291	0.387165	0	0	0	0	NA
7832	BTG2	BTG2	BTG anti-proliferation factor 2	HGNC:1131	1q32	DDRA13	human	NM_006763	93.2984	172.017	121.43	-0.408782	1.44806	0.330718	128.915	1.11976	0.120783	0.311532	0	0	0	0	0.00326797
695	BTK	BTK	Bruton tyrosine kinase	HGNC:1133	Xq21.33-q22	K01K03	human	NM_000061	129.493	84.4444	79.8785	0.389495	-0.342598	-0.749434	97.9385	0.25482	0.724025	0.59778	0	0	0	0	0.0130719
8945	BTRC	BTRC	beta-transducin repeat containing E3 ubiquitin protein ligase	HGNC:1144	10q24.32	hDG20M05	human	NM_003939	134.741	54.346	48.7538	0.730698	-1.05772	-0.654357	79.2802	-0.266161	0.712287	0.593511	0	0	0	0	0.00326797
699	BUB1	BUB1	BUB1 mitotic checkpoint serine/threonine kinase	HGNC:1148	2q13	DDRH19	human	NM_004336	130.694	117.426	155.039	0.258895	0.312476	1.10529	134.386	1.27252	0.0778675	0.265749	0	0	0	0	0.00653595
699	BUB1	BUB1	BUB1 mitotic checkpoint serine/threonine kinase	HGNC:1148	2q13	K01N09	human	NM_004336	66.9227	61.256	83.2437	-1.20648	-0.984971	-0.665123	70.4742	-0.512044	0.478009	0.510079	0	0	0	0	0.00653595
701	BUB1B	BUB1B	BUB1 mitotic checkpoint serine/threonine kinase B	HGNC:1149	15q15	K01C12	human	NM_001211	67.6676	87.9227	53.7041	-1.18748	-0.246243	-1.40519	69.7648	-0.53185	0.461152	0.504389	0	0	0	0	0.0130719
701	BUB1B	BUB1B	BUB1 mitotic checkpoint serine/threonine kinase B	HGNC:1149	15q15	DDRN09	human	NM_001211	64.2976	56.24	66.6745	-0.926573	-0.960292	-0.931232	62.4041	-0.737379	0.306905	0.43149	0	0	0	0	0.0130719
9184	BUB3	BUB3	BUB3, mitotic checkpoint protein	HGNC:1151	10q24	hDG01I10	human	NM_001007793	30.8131	48.1374	46.6667	-1.93916	-1.04239	-0.691248	41.8724	-1.31067	0.0693619	0.253334	0	0	0	0	NA
9184	BUB3	BUB3	BUB3, mitotic checkpoint protein	HGNC:1151	10q24	DDRH03	human	NM_001007793 NM_004725	125.733	96.1759	91.9755	0.170326	-0.129563	-0.348124	104.628	0.441611	0.540595	0.535119	0	0	0	0	NA
51637	C14ORF166	C14orf166	chromosome 14 open reading frame 166	HGNC:23169	14q22.1	hDG01A15	human	NM_016039	85.0653	80.7904	59.7155	0.803176	0.613173	0.0293257	75.1904	-0.380356	0.598167	0.555671	0	0	0	0	NA
84419	C15ORF48	C15orf48	chromosome 15 open reading frame 48	HGNC:29898	15q21.1	hDG25E13	human	NM_032413	136.092	75.6776	122.837	0.0309399	-0.809389	0.472144	111.536	0.634486	0.379321	0.467477	0	0	0	0	NA
29071	C1GALT1C1	C1GALT1C1	C1GALT1 specific chaperone 1	HGNC:24338	Xq24	hDG31K07	human	NM_001011551	99.2741	128.865	79.5857	0.0743533	0.430925	-0.320965	102.575	0.384281	0.5944	0.55398	0	0	0	0	0.00653595
54953	C1ORF27	C1orf27	chromosome 1 open reading frame 27	HGNC:24299	1q25	hDG25G13	human	NM_017847	135.42	73.9658	192.734	0.018564	-0.854355	2.17523	134.04	1.26285	0.0801775	0.26866	0	0	0	0	0.00653595
715	C1R	C1R	complement C1r subcomponent	HGNC:1246	12p13.31	hDG28N22	human	NM_001733	56.6502	85.9504	91.7465	-0.56469	-0.489006	0.610592	78.1157	-0.298675	0.67898	0.583928	0	0	0	0	0.00653595
51279	C1RL	C1RL	complement C1r subcomponent like	HGNC:21265	12p13.31	hDG28P22	human	NM_016546	91.5552	75.0608	73.8552	0.407832	-0.725078	0.0141998	80.1571	-0.241676	0.737717	0.601475	0	0	0	0	NA
716	C1S	C1S	complement component 1, s subcomponent	HGNC:1247	12p13	hDG28K17	human	NM_201442	29.064	57.9485	24.0149	-1.3333	-1.09605	-1.64718	37.0091	-1.44646	0.0450508	0.216979	-1	0	-1	0	0.0130719
717	C2	C2	complement component 2	HGNC:1248	6p21.3	hDG28M17	human	NM_000063	79.7326	83.6169	81.5229	0.0784292	-0.539593	0.269796	81.6241	-0.200713	0.780922	0.611605	0	0	0	0	0.00326797
54149	C21ORF91	C21orf91	chromosome 21 open reading frame 91	HGNC:16459	21q21.1	hDG18L21	human	NM_017447	61.2394	43.0117	16.8015	0.0525577	-0.148914	-1.61291	40.3508	-1.35315	0.0608066	0.238478	0	0	0	0	0.00326797
719	C3AR1	C3AR1	complement component 3a receptor 1	HGNC:1319	12p13.31	hDG08G09	human	NM_004054	80.1691	110.719	137.097	-0.418894	0.422483	1.7588	109.328	0.572845	0.427345	0.490335	0	0	0	0	0.00653595
728	C5AR1	C5AR1	complement component 5a receptor 1	HGNC:1338	19q13.32	hDG08I09	human	NM_001736	125.673	116.719	172.155	1.15728	0.600371	2.98825	138.182	1.3785	0.0561324	0.23376	0	0	0	0	0.00326797
27202	GPR77	C5AR2	complement component 5a receptor 2	HGNC:4527	19q13.33	hDG08K16	human	NM_018485	76.0697	97.7188	76.2325	-0.560892	0.0370599	-0.375666	83.3403	-0.152793	0.832327	0.623826	0	0	0	0	NA
733	C8G	C8G	complement component 8, gamma polypeptide	HGNC:1354	9q	hDG28H16	human	NM_000606	84.7994	115.508	61.5016	0.219602	0.15176	-0.397595	87.2697	-0.0430766	0.952404	0.651151	0	0	0	0	0.00326797
84909	C9ORF3	C9orf3	chromosome 9 open reading frame 3	HGNC:1361	9q22	hDG28O17	human	NM_032823	78.6066	88.2839	93.0245	0.0470575	-0.438419	0.653191	86.6383	-0.0607051	0.932964	0.647417	0	0	0	0	0.0163399
759	CA1	CA1	carbonic anhydrase 1	HGNC:1368	8q21.2	hDG22F11	human	NM_001738	78.6599	271.973	98.0135	-0.716646	1.63805	0.425994	149.549	1.69589	0.0188174	0.155003	1	0	1	0	0.00326797
56934	CA10	CA10	carbonic anhydrase 10	HGNC:1369	17q21	hDG01O11	human	NM_020178	79.7981	96.1667	67.1503	0.53693	1.39278	0.439885	81.0384	-0.217068	0.763583	0.608452	0	0	0	0	0.0130719
770	CA11	CA11	carbonic anhydrase 11	HGNC:1370	19q13.33	hDG01A13	human	NM_001217	87.8745	61.6132	83.2338	0.945175	-0.359144	1.32803	77.5738	-0.313806	0.66369	0.578342	0	0	0	0	NA
771	CA12	CA12	carbonic anhydrase 12	HGNC:1371	15q22	hDG22O06	human	NM_001218	62.9011	157.175	71.5264	-1.2731	0.0963558	-0.860863	97.2008	0.234221	0.745538	0.604134	0	0	0	0	0.00326797
377677	CA13	CA13	carbonic anhydrase 13	HGNC:14914	8q21.2	hDG22D19	human	NM_198584	113.759	191.854	75.1798	0.52273	0.562076	-0.683366	126.931	1.06435	0.140305	0.331806	0	0	0	0	NA
23632	CA14	CA14	carbonic anhydrase 14	HGNC:1372	1q21	hDG22A08	human	NM_012113	110.416	169.133	88.88	0.404694	0.256949	-0.0177498	122.81	0.94928	0.188412	0.361491	0	0	0	0	0.00653595
23632	CA14	CA14	carbonic anhydrase 14	HGNC:1372	1q21	DDRA06	human	NM_012113	67.7319	74.1928	51.9471	-0.865256	-0.586845	-1.27065	64.624	-0.675394	0.349351	0.451792	0	0	0	0	0.00653595
760	CA2	CA2	carbonic anhydrase 2	HGNC:1373	8q21.2	hDG22C08	human	NM_000067	94.4187	283.931	89.7934	-0.160192	1.79864	0.0266246	156.048	1.87736	0.00931165	0.112942	1	0	1	0	0.00653595
761	CA3	CA3	carbonic anhydrase 3	HGNC:1374	8q21.2	hDG22E08	human	NM_005181	121.161	335.351	87.9667	0.784096	2.48919	-0.0621241	181.493	2.58784	0.000338681	0.0198816	1	0	1	1	0.00980392
762	CA4	CA4	carbonic anhydrase 4	HGNC:1375	17q23.1	hDG22G08	human	NM_000717	132.144	128.475	62.941	1.17193	-0.289067	-1.27798	107.854	0.531671	0.461317	0.504434	0	0	0	0	0.0130719
763	CA5A	CA5A	carbonic anhydrase 5A	HGNC:1377	16q24.2	hDG22I08	human	NM_001739	72.9294	313.827	93.9947	-0.918994	2.20012	0.230747	160.25	1.9947	0.0057354	0.0923546	1	0	1	1	0.00326797
11238	CA5B	CA5B	carbonic anhydrase 5B	HGNC:1378	Xp22.1	hDG22K08	human	NM_007220	88.927	189.462	88.88	-0.354108	0.529957	-0.0177498	122.423	0.938479	0.193506	0.365638	0	0	0	0	0.00326797
765	CA6	CA6	carbonic anhydrase 6	HGNC:1380	1p36.2	hDG22H11	human	NM_001215	180.137	178.7	173.273	2.86659	0.385423	4.08244	177.37	2.47272	0.000612876	0.0275945	1	0	1	1	0.00980392
766	CA7	CA7	carbonic anhydrase 7	HGNC:1381	16q22.1	hDG22J11	human	NM_005182	115.908	203.812	98.9268	0.598611	0.722669	0.470369	139.549	1.41667	0.0496722	0.225619	1	0	1	0	NA
767	CA8	CA8	carbonic anhydrase 8	HGNC:1382	8q12.1	hDG01C13	human	NM_004056	67.6835	47.4463	78.8336	-0.0754365	-1.07743	1.08505	64.6545	-0.674543	0.34996	0.45194	0	0	0	0	0.00980392
768	CA9	CA9	carbonic anhydrase 9	HGNC:1383	9p13.3	hDG22M08	human	NM_001216	123.071	226.532	78.6505	0.851545	1.0278	-0.514743	142.751	1.50609	0.0369312	0.199502	1	0	1	0	NA
773	CACNA1A	CACNA1A	calcium voltage-gated channel subunit alpha1 A	HGNC:1388	19p13	hDG12C17	human	NM_000068	53.8431	131.327	66.4562	-0.645584	0.590179	-0.382819	83.8755	-0.137849	0.848523	0.627212	0	0	0	0	0.0196078
774	CACNA1B	CACNA1B	calcium voltage-gated channel subunit alpha1 B	HGNC:1389	9q34	hDG13H14	human	NM_000718	65.5856	59.1946	41.2875	-0.0404694	-0.523876	-1.24934	55.3559	-0.934179	0.195521	0.365638	0	0	0	0	0.00980392
775	CACNA1C	CACNA1C	calcium voltage-gated channel subunit alpha1 C	HGNC:1390	12p13.3	hDG12E17	human	NM_000719	76.5471	120.628	92.0455	0.0481779	0.37097	0.309901	96.4067	0.212049	0.768894	0.60919	0	0	0	0	0.0326797
776	CACNA1D	CACNA1D	calcium voltage-gated channel subunit alpha1 D	HGNC:1391	3p14.3	hDG12G17	human	NM_000720	60.7804	123.097	28.7458	-0.433601	0.421557	-1.40367	70.8743	-0.500871	0.487688	0.514835	0	0	0	0	0.0457516
777	CACNA1E	CACNA1E	calcium voltage-gated channel subunit alpha1 E	HGNC:1392	1q25.3	hDG12I17	human	NM_000721	55.7351	192.233	83.2912	-0.587771	1.83799	0.0729179	110.42	0.60332	0.403222	0.476738	0	0	0	0	0.0490196
778	CACNA1F	CACNA1F	calcium voltage-gated channel subunit alpha1 F	HGNC:1393	Xp11.23	hDG12K17	human	NM_005183	80.3311	137.088	97.4327	0.163805	0.708215	0.455737	104.951	0.450617	0.532376	0.531598	0	0	0	0	0.0163399
8913	CACNA1G	CACNA1G	calcium voltage-gated channel subunit alpha1 G	HGNC:1394	17q22	DDRB09	human	NM_018896 NM_198376 NM_198377 NM_198378 NM_198379 NM_198380 NM_198382 NM_198383 NM_198384 NM_198385 NM_198386 NM_198387 NM_198388 NM_198396 NM_198397	89.4825	87.0163	79.5138	-0.476913	-0.320097	-0.635327	85.3375	-0.097027	0.89305	0.638998	0	0	0	0	0.0326797
8913	CACNA1G	CACNA1G	calcium voltage-gated channel subunit alpha1 G	HGNC:1394	17q22	hDG12M17	human	NM_198396	89.1604	132.973	71.8434	0.433601	0.623904	-0.236983	97.9924	0.256324	0.722464	0.59778	0	0	0	0	0.0326797
8912	CACNA1H	CACNA1H	calcium voltage-gated channel subunit alpha1 H	HGNC:1395	16p13.3	hDG13J14	human	NM_001005407	62.9725	97.2344	71.8976	-0.134898	0.759621	-0.11497	77.3681	-0.319549	0.657925	0.57744	0	0	0	0	0.0196078
8911	CACNA1I	CACNA1I	calcium voltage-gated channel subunit alpha1 I	HGNC:1396	22q13.1	hDG14A11	human	NM_001003406	61.4951	61.911	101.745	0.0149887	0.180961	5.10686	75.0503	-0.384268	0.594412	0.55398	0	0	0	0	0.0228758
779	CACNA1S	CACNA1S	calcium voltage-gated channel subunit alpha1 S	HGNC:1397	1q32	hDG13M22	human	NM_000069	81.6379	70.0631	99.1986	0.539593	-0.157163	0.896766	83.6332	-0.144616	0.841178	0.625761	0	0	0	0	0.0359477
781	CACNA2D1	CACNA2D1	calcium voltage-gated channel auxiliary subunit alpha2delta 1	HGNC:1399	7q21-q22	hDG12O17	human	NM_000722	62.6724	103.344	158.712	-0.375788	0.0168623	2.11462	108.243	0.542536	0.452219	0.499878	0	0	0	0	0.0359477
9254	CACNA2D2	CACNA2D2	calcium voltage-gated channel auxiliary subunit alpha2delta 2	HGNC:1400	3p21.3	hDG12A19	human	NM_006030	75.2858	69.5988	96.0859	0.00963558	-0.674491	0.419278	80.3235	-0.23703	0.742579	0.602699	0	0	0	0	NA
55799	CACNA2D3	CACNA2D3	calcium voltage-gated channel auxiliary subunit alpha2delta 3	HGNC:15460	3p21.1	hDG12C19	human	NM_018398	97.3591	106.636	61.7424	0.684126	0.0843113	-0.510425	88.5791	-0.00651477	0.992798	0.663111	0	0	0	0	0.00653595
93589	CACNA2D4	CACNA2D4	calcium voltage-gated channel auxiliary subunit alpha2delta 4	HGNC:20202	12p13.33	hDG13L14	human	NM_001005766	84.251	129.452	98.7849	0.634021	1.84666	0.881437	104.163	0.428609	0.552583	0.54107	0	0	0	0	0.0130719
782	CACNB1	CACNB1	calcium voltage-gated channel auxiliary subunit beta 1	HGNC:1401	17q12	hDG12E19	human	NM_000723	146.551	58.8992	80.5976	2.18728	-0.8937	0	95.3493	0.182523	0.800344	0.616145	0	0	0	0	0.0130719
783	CACNB2	CACNB2	calcium voltage-gated channel auxiliary subunit beta 2	HGNC:1402	10p12	hDG12G19	human	NM_201593	70.8711	64.6605	34.133	-0.125263	-0.775664	-1.25783	56.5549	-0.900701	0.212022	0.375557	0	0	0	0	0.0130719
784	CACNB3	CACNB3	calcium voltage-gated channel auxiliary subunit beta 3	HGNC:1403	12q13.12	hDG12I19	human	NM_000725	68.3484	35.8539	59.0488	-0.202347	-1.36584	-0.583343	54.4171	-0.960393	0.183276	0.35878	0	0	0	0	0.00653595
785	CACNB4	CACNB4	calcium voltage-gated channel auxiliary subunit beta 4	HGNC:1404	2q23.3	hDG13O22	human	NM_000726	129.795	78.9908	139.323	2.27978	0.144066	2.38371	116.036	0.760142	0.292225	0.422577	0	0	0	0	0.00326797
10369	CACNG2	CACNG2	calcium voltage-gated channel auxiliary subunit gamma 2	HGNC:1406	22q13.1	hDG13D03	human	NM_006078	46.1736	82.8724	61.5564	-0.74194	0.275035	-0.498203	63.5341	-0.705825	0.328069	0.442484	0	0	0	0	0.00653595
10368	CACNG3	CACNG3	calcium voltage-gated channel auxiliary subunit gamma 3	HGNC:1407	16p12.1	hDG12M19	human	NM_006539	108.711	115.689	83.9646	1.03101	0.269796	0.0911474	102.788	0.390238	0.588694	0.552056	0	0	0	0	NA
27092	CACNG4	CACNG4	calcium voltage-gated channel auxiliary subunit gamma 4	HGNC:1408	17q24	hDG13P14	human	NM_014405	52.5198	101.116	57.0062	-0.512613	0.89059	-0.666826	70.214	-0.519308	0.471793	0.508001	0	0	0	0	0.00653595
27091	CACNG5	CACNG5	calcium voltage-gated channel auxiliary subunit gamma 5	HGNC:1409	17q24	hDG13B07	human	NM_145811	68.5721	113.149	75.2068	0.0674491	1.29659	0.00766467	85.6426	-0.0885076	0.902393	0.641216	0	0	0	0	0.00980392
59284	CACNG7	CACNG7	calcium voltage-gated channel auxiliary subunit gamma 7	HGNC:13626	19q13.4	hDG13D07	human	NM_031896	62.5992	50.2669	24.3278	-0.148388	-0.825105	-1.87784	45.7313	-1.20292	0.0955625	0.286389	0	0	0	0	0.00326797
59283	CACNG8	CACNG8	calcium voltage-gated channel auxiliary subunit gamma 8	HGNC:13628	19q13.4	hDG13L08	human	NM_031895	64.0924	50.655	73.9659	-0.0944287	-0.812008	-0.0383233	62.9044	-0.723407	0.316162	0.436079	0	0	0	0	0.0130719
143384	C10ORF46	CACUL1	CDK2 associated cullin domain 1	HGNC:23727	10q26.13	hDG20C06	human	NM_153810	99.7778	96.8776	63.8595	-0.0983632	-0.091976	-0.151005	86.8383	-0.0551215	0.939118	0.648086	0	0	0	0	NA
27101	CACYBP	CACYBP	calcyclin binding protein	HGNC:30423	1q24-q25	hDG22M09	human	NM_001007214	118.535	213.378	99.6575	0.691353	0.851143	0.505868	143.857	1.53696	0.0332224	0.194464	1	0	1	0	0.00653595
790	CAD	CAD	carbamoyl-phosphate synthetase 2, aspartate transcarbamylase, and dihydroorotase	HGNC:1424	2p22-p21	hDG31O20	human	NM_004341	96.5088	152.628	84.8188	0.0212438	0.796274	-0.209325	111.318	0.628415	0.383901	0.46872	0	0	0	0	0.00653595
23705	IGSF4	CADM1	cell adhesion molecule 1	HGNC:5951	11q23.2	hDG07A06	human	NM_014333	138.867	108.274	89.4725	1.88115	2.25501	0.594353	112.205	0.653165	0.365445	0.460458	0	0	0	0	0.00653595
253559	IGSF4D	CADM2	cell adhesion molecule 2	HGNC:29849	3p12.2	hDG06C22	human	NM_153184	128.838	132.998	145.577	1.46757	1.58199	2.81937	135.804	1.31212	0.0690546	0.253222	0	0	0	0	0.0261438
57863	IGSF4B	CADM3	cell adhesion molecule 3	HGNC:17601	1q21.2-q22	hDG06O20	human	NM_021189	70.0513	75.6447	42.0035	0.192712	0.340924	-0.161878	62.5665	-0.732843	0.309893	0.433568	0	0	0	0	0.00326797
199731	IGSF4C	CADM4	cell adhesion molecule 4	HGNC:30825	19q13.32	hDG06A22	human	NM_145296	38.3794	40.7339	37.3169	-0.494132	-0.414505	-0.296776	38.8101	-1.39617	0.0530484	0.230113	0	0	0	0	0.00980392
796	CALCA	CALCA	calcitonin related polypeptide alpha	HGNC:1437	11p15.2	hDG09M05	human	NM_001741	21.5377	39.925	11.2576	-1.78887	-1.05065	-2.06137	24.2401	-1.803	0.0124849	0.130698	-1	0	-1	-1	0.00326797
10241	CALCOCO2	CALCOCO2	calcium binding and coiled-coil domain 2	HGNC:29912	17q21.32	hDG20K18	human	NM_005831	58.2963	98.903	89.2372	-1.082	-0.045988	0.694625	82.1455	-0.186156	0.79645	0.615213	0	0	0	0	NA
799	CALCR	CALCR	calcitonin receptor	HGNC:1440	7q21.3	hDG08K09	human	NM_001742	106.405	116.219	106.908	0.489893	0.585547	0.700104	109.844	0.587249	0.415808	0.484138	0	0	0	0	0.0130719
10203	CALCRL	CALCRL	calcitonin receptor like receptor	HGNC:16709	2q21.1-q21.3	hDG08M09	human	NM_005795	65.0013	98.7188	105.934	-0.944287	0.0667079	0.665953	89.8848	0.0299421	0.966906	0.654979	0	0	0	0	0.00326797
8536	CAMK1	CAMK1	calcium/calmodulin dependent protein kinase I	HGNC:1459	3p25.3	K01M22	human	NM_003656	109.381	68.2126	124.749	-0.123498	-0.792259	0.374717	100.781	0.334181	0.64333	0.572576	0	0	0	0	0.00326797
57118	CAMK1D	CAMK1D	calcium/calmodulin dependent protein kinase ID	HGNC:19341	10p13	K01H22	human	NM_153498	103.049	63.5749	109.418	-0.284996	-0.920733	-0.00936793	92.0141	0.0893979	0.901416	0.641216	0	0	0	0	0.00980392
57172	CAMK1G	CAMK1G	calcium/calmodulin dependent protein kinase IG	HGNC:14585	1q32.2	K02N05	human	NM_020439	56.2861	78.6119	33.1431	-0.412189	-0.365349	-1.11678	56.0137	-0.915811	0.204457	0.371542	0	0	0	0	0.00326797
815	CAMK2A	CAMK2A	calcium/calmodulin dependent protein kinase II alpha	HGNC:1460	5q32	K01N22	human	NM_171825	123.906	88.3092	52.9563	0.246997	-0.235536	-1.42392	88.3905	-0.0117816	0.986975	0.662014	0	0	0	0	0.00326797
816	CAMK2B	CAMK2B	calcium/calmodulin dependent protein kinase II beta	HGNC:1461	7p14.3-p14.1	K01E12	human	NM_001220	47.5559	46.9565	31.269	-1.70048	-1.3811	-1.96726	41.9271	-1.30914	0.0696873	0.253756	0	0	0	0	0.00653595
817	CAMK2D	CAMK2D	calcium/calmodulin dependent protein kinase II delta	HGNC:1462	4q26	K01G12	human	NM_001221	96.7179	116.522	145.314	-0.446494	0.546016	0.889953	119.518	0.857366	0.234843	0.385857	0	0	0	0	0.00326797
818	CAMK2G	CAMK2G	calcium/calmodulin dependent protein kinase II gamma	HGNC:1463	10q22	K01P22	human	NM_172170	72.8818	47.7295	57.0694	-1.05449	-1.35969	-1.32088	59.2269	-0.826092	0.252352	0.396843	0	0	0	0	0.00326797
814	CAMK4	CAMK4	calcium/calmodulin dependent protein kinase IV	HGNC:1464	5q22.1	K01I16	human	NM_001744	183.496	180.29	130.731	1.76698	2.31254	0.524604	164.839	2.12283	0.00327002	0.0677001	1	0	1	1	NA
84254	CAMKK1	CAMKK1	calcium/calmodulin dependent protein kinase kinase 1	HGNC:1469	17p13.3	K02J13	human	NM_032294	69.0029	130.737	144.983	0	0.927425	2.13404	114.908	0.728634	0.312695	0.434565	0	0	0	0	0.00326797
10645	CAMKK2	CAMKK2	calcium/calmodulin dependent protein kinase kinase 2	HGNC:1470	12q24.31	K02O09	human	NM_006549	47.0376	97.8754	107.703	-0.711962	0.112415	1.05044	84.2054	-0.128638	0.858532	0.629593	0	0	0	0	0.0163399
79012	CAMKV	CAMKV	CaM kinase like vesicle associated	HGNC:28788	3p21.31	K03K09	human	NM_024046	27.381	16.6442	74.5314	-1.11867	-1.56404	-0.337245	39.5189	-1.37638	0.0565123	0.234207	0	0	0	0	0.00326797
124583	CANT1	CANT1	calcium activated nucleotidase 1	HGNC:19721	17q25.3	hDG27M12	human	NM_138793	48.2736	132.451	116.415	-1.20198	0.267813	0.046198	99.0465	0.285757	0.692149	0.58692	0	0	0	0	NA
10487	CAP1	CAP1	adenylate cyclase associated protein 1	HGNC:20040	1p34.3	hDG02G05	human	NM_006367	61.3486	58.9985	87.7695	0.124248	0.0868156	1.37342	69.3722	-0.542813	0.451966	0.499878	0	0	0	0	0.00653595
823	CAPN1	CAPN1	calpain 1	HGNC:1476	11q13	hDG28O03	human	NM_005186	129.275	127.175	45.3142	1.45878	0.404694	-0.937187	100.588	0.328807	0.648687	0.574873	0	0	0	0	NA
11132	CAPN10	CAPN10	calpain 10	HGNC:1477	2q37.3	hDG28A19	human	NM_023089	83.1105	82.8391	74.2812	0.172544	-0.556455	0.0283996	80.0769	-0.243914	0.735378	0.601153	0	0	0	0	0.00980392
11131	CAPN11	CAPN11	calpain 11	HGNC:1478	6p12	hDG28C19	human	NM_007058	61.1541	122.509	32.5346	-0.439203	0.303521	-1.36318	72.0657	-0.467603	0.517049	0.526797	0	0	0	0	0.00326797
147968	CAPN12	CAPN12	calpain 12	HGNC:13249	19q13.2	hDG28E19	human	NM_144691	97.7481	85.1726	85.3568	0.580376	-0.505868	0.397595	89.4258	0.0171269	0.981066	0.660147	0	0	0	0	0.00653595
92291	CAPN13	CAPN13	calpain 13	HGNC:16663	2p22-p21	hDG29C03	human	NM_144575	116.297	148.774	72.6941	0.379401	0.651627	-0.661765	112.588	0.663872	0.357648	0.455787	0	0	0	0	0.00653595
440854	CAPN14	CAPN14	calpain 14	HGNC:16664	2p23.1-p21	hDG29E03	human	XR_017746	68.1927	154.378	115.799	-0.857165	0.743083	0.0890837	112.79	0.669506	0.353588	0.453729	0	0	0	0	NA
6650	SOLH	CAPN15	calpain 15	HGNC:11182	16p13.3	hDG28P21	human	NM_005632	114.638	120.953	39.7764	1.05095	0.269796	-1.12178	91.7889	0.0831104	0.908321	0.641679	0	0	0	0	NA
824	CAPN2	CAPN2	calpain 2	HGNC:1479	1q41-q42	hDG28G19	human	NM_001748	88.1773	128.731	75.1331	0.313717	0.438419	0.0567992	97.3472	0.23831	0.741243	0.602232	0	0	0	0	0.0130719
825	CAPN3	CAPN3	calpain 3	HGNC:1480	15q15.1	hDG28I19	human	NM_212464	39.7607	23.7239	49.574	-1.03526	-1.83799	-0.795189	37.6862	-1.42755	0.0479292	0.221388	-1	0	-1	0	0.00980392
726	CAPN5	CAPN5	calpain 5	HGNC:1482	11q14	hDG28N16	human	NM_004055	32.4419	183.957	64.9095	-1.23918	1.63564	-0.283996	93.7695	0.138414	0.847927	0.627212	0	0	0	0	0.00326797
827	CAPN6	CAPN6	calpain 6	HGNC:1483	Xq23	hDG29G19	human	NM_014289	52.3403	96.2347	126.027	-1.26467	-0.205777	0.267251	91.5341	0.0759956	0.916138	0.643902	0	0	0	0	0.00653595
23473	CAPN7	CAPN7	calpain 7	HGNC:1484	3p24	hDG28M19	human	NM_014296	22.3082	50.1702	53.4079	-1.52153	-1.26467	-0.667391	41.9621	-1.30816	0.0698972	0.253854	0	0	0	0	0.00326797
10753	CAPN9	CAPN9	calpain 9	HGNC:1486	1q42.11-q42.3	hDG28O19	human	NM_016452	87.6144	101.507	65.3355	0.298031	-0.15176	-0.269796	84.819	-0.111506	0.877209	0.635175	0	0	0	0	0.00980392
826	CAPNS1	CAPNS1	calpain small subunit 1	HGNC:1481	19q13.1	hDG28A21	human	NM_001003962	144.476	107.73	81.5229	1.8823	-0.0168623	0.269796	111.243	0.626304	0.385497	0.469108	0	0	0	0	0.00326797
84290	CAPNS2	CAPNS2	calpain small subunit 2	HGNC:16371	16q12.2	hDG28C21	human	NM_032330	65.658	96.8401	50	-0.313717	-0.252934	-0.780989	70.8327	-0.502033	0.48666	0.514617	0	0	0	0	0.00653595
4076	GPIAP1	CAPRIN1	cell cycle associated protein 1	HGNC:6743	11p13	hDG13L17	human	NM_005898	63.3458	45.6089	68.5884	-0.121408	-0.982268	-0.237605	59.181	-0.827372	0.251618	0.396358	0	0	0	0	0.00326797
65981	C1QDC1	CAPRIN2	caprin family member 2	HGNC:21259	12p11	hDG12J12	human	NM_032156	78.4391	83.5905	92.0455	0.105991	-0.387832	0.309901	84.6917	-0.11506	0.873328	0.634596	0	0	0	0	0.0130719
79092	CARD14	CARD14	caspase recruitment domain family member 14	HGNC:16446	17q25.3	K02I14	human	NM_024110	80.5636	114.873	94.0086	0.374717	0.533972	0.652376	96.4816	0.214139	0.766681	0.608716	0	0	0	0	0.00326797
114769	COP1	CARD16	caspase recruitment domain family member 16	HGNC:33701	11q23	hDG28B12	human	NM_001017534	55.5243	151.288	65.7614	-0.596062	0.927425	-0.255596	90.858	0.057117	0.936922	0.64799	0	0	0	0	0.00326797
440068	INCA	CARD17	caspase recruitment domain family member 17	HGNC:33827	11q22.3	hDG04K05	human	NM_001007232	101.684	59.1136	86.7691	0.429221	0.0621241	0.729928	82.5221	-0.17564	0.807717	0.61853	0	0	0	0	0.00326797
10498	CARM1	CARM1	coactivator associated arginine methyltransferase 1	HGNC:23393	19p13.2	hDG31A09	human	NM_199141	67.1967	15.5369	35.1049	-0.541717	-1.31151	-1.2699	39.2795	-1.38307	0.0553225	0.233449	0	0	0	0	0.00980392
8573	CASK	CASK	calcium/calmodulin dependent serine protein kinase	HGNC:1497	Xp11.4	K02H08	human	NM_003688	102.529	190.793	91.7261	1.08668	2.41693	0.586033	128.349	1.10396	0.126127	0.318319	0	0	0	0	0.00326797
834	CASP1	CASP1	caspase 1	HGNC:1499	11q23	hDG29G03	human	NM_001223	90.6047	99.0368	187.397	-0.281038	-0.160049	1.33626	125.68	1.02941	0.153789	0.340444	0	0	0	0	0.00653595
843	CASP10	CASP10	caspase 10	HGNC:1500	2q33-q34	hDG04N21	human	NM_032974	130.774	50.4662	58.0376	0.981077	-0.292871	-0.425022	79.7594	-0.25278	0.726152	0.597984	0	0	0	0	0.00653595
23581	CASP14	CASP14	caspase 14	HGNC:1502	19p13.1	hDG29I03	human	NM_012114	102.084	209.72	269.224	0.0140519	1.64621	2.76159	193.676	2.92801	4.99797e-05	0.00643841	1	1	1	1	0.00326797
835	CASP2	CASP2	caspase 2	HGNC:1503	7q34-q35	hDG28E21	human	NM_032982	109.008	54.8371	59.3717	0.894092	-1.1635	-0.468594	74.4055	-0.402272	0.577257	0.548674	0	0	0	0	NA
836	CASP3	CASP3	caspase 3	HGNC:1504	4q34	hDG28G21	human	NM_004346	121.956	59.5041	45.3142	1.25487	-1.06232	-0.937187	75.5916	-0.369155	0.609001	0.560148	0	0	0	0	0.00326797
837	CASP4	CASP4	caspase 4	HGNC:1505	11q22.2-q22.3	hDG04C22	human	NM_001225	6.86869	27.5503	43.3271	-1.36942	-1.23361	-1.01636	25.9154	-1.75622	0.0149609	0.141781	-1	0	-1	0	0.00326797
838	CASP5	CASP5	caspase 5	HGNC:1506	11q22.2-q22.3	hDG28I21	human	NM_004347	144.476	85.9504	123.269	1.8823	-0.489006	1.66138	117.899	0.812147	0.260456	0.400821	0	0	0	0	0.0163399
839	CASP6	CASP6	caspase 6	HGNC:1507	4q25	hDG28K21	human	NM_001226	84.7994	85.1726	43.1842	0.219602	-0.505868	-1.00819	71.0521	-0.495907	0.491993	0.516234	0	0	0	0	0.00653595
840	CASP7	CASP7	caspase 7	HGNC:1508	10q25	hDG28M21	human	NM_033340	50.4574	27.613	92.1725	-0.737234	-1.75368	0.624791	56.7477	-0.895318	0.214774	0.376995	0	0	0	0	0.00326797
841	CASP8	CASP8	caspase 8	HGNC:1509	2q33-q34	hDG28O21	human	NM_001228	119.704	49.3923	65.7614	1.19212	-1.28153	-0.255596	78.2861	-0.293919	0.68382	0.585093	0	0	0	0	0.0751634
842	CASP9	CASP9	caspase 9	HGNC:1511	1p36.21	hDG29K03	human	NM_001229	119.03	128.459	76.347	0.449661	0.320097	-0.598133	107.945	0.534229	0.459156	0.504042	0	0	0	0	NA
845	CASQ2	CASQ2	calsequestrin 2	HGNC:1513	1p13.1	hDG04C05	human	NM_001232	199.731	45.71	83.5512	2.28918	-0.488118	0.600574	109.664	0.58222	0.419882	0.485646	0	0	0	0	0.00653595
846	CASR	CASR	calcium sensing receptor	HGNC:1514	3q21.1	hDG06E16	human	NM_000388	16.2774	16.9311	16.696	-0.973441	-0.929571	-0.890328	16.6348	-2.01535	0.00523311	0.0879303	-1	-1	-1	0	0.00980392
847	CAT	CAT	catalase	HGNC:1516	11p13	hDG25K13	human	NM_001752	123.992	131.027	74.3945	-0.191828	0.644513	-0.708215	109.804	0.586141	0.416698	0.484257	0	0	0	0	0.00653595
117144	CATSPER1	CATSPER1	cation channel sperm associated 1	HGNC:17116	11q12.1	hDG12A18	human	NM_053054	149.074	200.463	228.072	2.26436	2.00661	3.99226	192.536	2.8962	6.01556e-05	0.00741274	1	1	1	1	0.0130719
117155	CATSPER2	CATSPER2	cation channel sperm associated 2	HGNC:18810	15q15.3	hDG12C18	human	NM_054020	171.147	155.195	67.803	2.93885	1.07919	-0.34636	131.382	1.18863	0.0995879	0.290057	0	0	0	0	0.0130719
347732	CATSPER3	CATSPER3	cation channel sperm associated 3	HGNC:20819	5q31.2	hDG12E18	human	NM_178019	38.0765	58.8992	123.022	-1.12736	-0.8937	1.14846	73.3325	-0.432233	0.549243	0.539876	0	0	0	0	0.00980392
378807	CATSPER4	CATSPER4	cation channel sperm associated 4	HGNC:23220	1p35.3	hDG12G18	human	NM_198137	75.2858	53.9609	48.2744	0.00963558	-0.994874	-0.875015	59.1737	-0.827577	0.251501	0.396358	0	0	0	0	0.00326797
857	CAV1	CAV1	caveolin 1	HGNC:1527	7q31	hDG04M05	human	NM_001753	99.5286	81.3809	63.3242	0.388343	0.976237	-0.212511	81.4112	-0.206657	0.774608	0.609894	0	0	0	0	NA
858	CAV2	CAV2	caveolin 2	HGNC:1528	7q31	hDG04O05	human	NM_001233	47.8114	89.596	57.3481	-0.592734	1.31348	-0.45274	64.9185	-0.66717	0.355254	0.454484	0	0	0	0	NA
859	CAV3	CAV3	caveolin 3	HGNC:1529	3p25	hDG04A07	human	NM_033337	79.0572	75.5438	71.8288	0	0.736615	0.129354	75.4766	-0.372365	0.605878	0.558827	0	0	0	0	NA
867	CBL	CBL	Cbl proto-oncogene	HGNC:1541	11q23.3	hDG19M04	human	NM_005188	100.816	63.5607	194.146	0.0731376	-0.724453	2.40509	119.507	0.857071	0.235048	0.385857	0	0	0	0	0.00653595
868	CBLB	CBLB	Cbl proto-oncogene B	HGNC:1542	3q13.11	hDG20I06	human	NM_170662	150.741	235.949	114.011	1.1101	3.06587	1.52012	166.9	2.18038	0.0025224	0.0584887	1	0	1	1	0.00653595
23624	CBLC	CBLC	Cbl proto-oncogene C	HGNC:15961	19q13.2	hDG19A05	human	NM_012116	116.135	68.2196	76.0157	0.511963	-0.607874	-0.594617	86.79	-0.0564694	0.937633	0.647994	0	0	0	0	NA
79872	CBLL1	CBLL1	Cbl proto-oncogene like 1	HGNC:21225	7q22.3	hDG18B09	human	NM_024814	58.9064	64.1281	23.2721	-0.0525577	0.91976	-1.29033	48.7689	-1.1181	0.121324	0.311655	0	0	0	0	0.00326797
873	CBR1	CBR1	carbonyl reductase 1	HGNC:1548	21q22.1	hDG25O13	human	NM_001757	88.3613	110.485	138.754	-0.847754	0.104921	0.859976	112.534	0.662346	0.358745	0.456475	0	0	0	0	NA
874	CBR3	CBR3	carbonyl reductase 3	HGNC:1549	21q22.2	hDG25A15	human	NM_001236	61.4706	77.9601	53.6332	-1.34279	-0.749434	-1.21408	64.3546	-0.682915	0.344011	0.449272	0	0	0	0	0.00326797
84869	CBR4	CBR4	carbonyl reductase 4	HGNC:25891	4q32.3	hDG25F15	human	NM_032783	201.975	105.92	166.436	1.24379	-0.0149887	1.53447	158.11	1.93495	0.00734498	0.102973	1	0	1	0	NA
875	CBS	CBS	cystathionine-beta-synthase	HGNC:1550	21q22.3	hDG22H07	human	NM_000071	119.728	200.224	250.36	0.733509	0.674491	7.82764	190.104	2.82828	8.93256e-05	0.00952438	1	1	1	1	NA
10951	CBX1	CBX1	chromobox 1	HGNC:1551	17q21.32	hDG23F04	human	NM_006807	187.272	188.979	163.795	1.70326	1.66639	1.35623	180.015	2.54658	0.000418496	0.0233748	1	0	1	0	0.00326797
23468	CBX5	CBX5	chromobox 5	HGNC:1555	12q13.13	DDRD07	human	NM_001127321 NM_001127322 NM_012117	31.0995	79.6886	25.1357	-1.51931	-0.472525	-1.88857	45.3079	-1.21474	0.0923526	0.283447	0	0	0	0	0.00326797
55749	CCAR1	CCAR1	cell division cycle and apoptosis regulator 1	HGNC:24236	10q22.1	hDG04L17	human	NM_018237	76.9024	71.8687	49.3033	-0.0408782	0.585742	-0.776126	66.0248	-0.636281	0.377965	0.46655	0	0	0	0	0.00980392
147872	FLJ32658	CCDC155	coiled-coil domain containing 155	HGNC:26520	19q13.33	hDG27P19	human	NM_144688	110.849	199.682	175.903	0.864732	1.44817	1.0256	162.145	2.0476	0.0045561	0.0823929	1	0	1	0	0.00653595
881	CCIN	CCIN	calicin	HGNC:1568	9p13.1	hDG20C20	human	NM_005893	47.6296	91.4768	19.7508	-1.33493	-0.214611	-1.62079	52.9524	-1.00129	0.16533	0.346968	0	0	0	0	0.00326797
886	CCKAR	CCKAR	cholecystokinin A receptor	HGNC:1570	4p15.2	hDG08H10	human	NM_000730	115.424	84.2188	149.757	0.802289	-0.363187	2.20277	116.466	0.77216	0.284662	0.416577	0	0	0	0	0.0130719
887	CCKBR	CCKBR	cholecystokinin B receptor	HGNC:1571	11p15.4	hDG08P20	human	NM_176875	117.064	54.2188	64.0596	0.859088	-1.25263	-0.802559	78.4474	-0.289414	0.688409	0.586429	0	0	0	0	0.00980392
6356	CCL11	CCL11	C-C motif chemokine ligand 11	HGNC:10610	17q21.1-q21.2	hDG09B09	human	NM_002986	144.826	72.1334	110.243	2.60021	0.27239	1.63697	109.068	0.565567	0.433246	0.492551	0	0	0	0	NA
6357	CCL13	CCL13	C-C motif chemokine ligand 13	HGNC:10611	17q11.2	hDG09D09	human	NM_005408	78.3765	64.555	53.4483	0.234605	-0.0389129	-0.485027	65.4599	-0.652052	0.366257	0.460458	0	0	0	0	NA
6362	CCL18	CCL18	C-C motif chemokine ligand 18	HGNC:10616	17q12	hDG09F09	human	NM_002988	47.8977	53.1873	71.2982	-0.850445	-0.505868	0.181885	57.4611	-0.875398	0.22514	0.381196	0	0	0	0	NA
23113	PARC	CCL18	C-C motif chemokine ligand 18	HGNC:10616	17q12	hDG18O21	human	NM_015089	30.1337	117.092	35.0368	-1.34898	3.6002	-0.703816	60.7542	-0.783446	0.277697	0.413393	0	0	0	0	NA
6363	CCL19	CCL19	C-C motif chemokine ligand 19	HGNC:10617	9p13	hDG10A13	human	NM_006274	53.469	73.856	53.1677	-0.28206	0.0367904	-0.69272	60.1642	-0.79992	0.267693	0.406096	0	0	0	0	NA
6347	CCL2	CCL2	C-C motif chemokine ligand 2	HGNC:10618	17q11.2-q21.1	hDG09H09	human	NM_002982	86.614	60.7657	186.917	0.527862	-0.194565	4.50166	111.432	0.631593	0.381537	0.46785	0	0	0	0	0.00653595
6364	CCL20	CCL20	C-C motif chemokine ligand 20	HGNC:10619	2q36.3	hDG10C13	human	NM_004591	73.6521	173.187	167.296	0.478275	2.88192	3.54563	138.045	1.37468	0.0568317	0.234906	0	0	0	0	0.00326797
6366	CCL21	CCL21	C-C motif chemokine ligand 21	HGNC:10620	9p13	hDG09J09	human	NM_002989	61.0777	50.3454	74.9493	-0.381234	-0.622607	0.318299	62.1241	-0.745195	0.301808	0.427964	0	0	0	0	NA
6367	CCL22	CCL22	C-C motif chemokine ligand 22	HGNC:10621	16q13	hDG09L09	human	NM_002990	65.7457	48.4508	44.1176	-0.215055	-0.700433	-0.83364	52.7714	-1.00634	0.163194	0.345422	0	0	0	0	NA
6368	CCL23	CCL23	C-C motif chemokine ligand 23	HGNC:10622	17q12	hDG09N09	human	NM_005064	84.692	91.3953	53.0426	0.459436	1.06362	-0.500184	76.3766	-0.347235	0.630416	0.568569	0	0	0	0	0.00653595
6370	CCL25	CCL25	C-C motif chemokine ligand 25	HGNC:10624	19p13.2	hDG09P09	human	NM_005624	92.1057	101.816	154.057	0.723367	1.49166	3.27393	115.993	0.758933	0.292994	0.422589	0	0	0	0	0.00653595
10344	CCL26	CCL26	C-C motif chemokine ligand 26	HGNC:10625	7q11.2	hDG09B11	human	NM_006072	108.855	78.7646	81.8458	1.31966	0.544781	0.57597	89.8219	0.028187	0.968845	0.655546	0	0	0	0	NA
10850	CCL27	CCL27	C-C motif chemokine ligand 27	HGNC:10626	9p13	hDG09A17	human	NM_006664	79.2003	62.3446	72.5152	0.263931	-0.12971	0.227356	71.3534	-0.487495	0.499362	0.518454	0	0	0	0	NA
6348	CCL3	CCL3	C-C motif chemokine ligand 3	HGNC:10627	17q12	hDG09D11	human	NM_002983	87.4378	88.5534	27.0791	0.557188	0.946881	-1.47024	67.6901	-0.589781	0.413813	0.483151	0	0	0	0	0.00326797
6351	CCL4	CCL4	C-C motif chemokine ligand 4	HGNC:10630	17q12	hDG10E13	human	NM_002984	35.5646	46.8825	72.0663	-0.956551	-0.735808	0.00911474	51.5045	-1.04172	0.148904	0.337069	0	0	0	0	NA
6352	CCL5	CCL5	C-C motif chemokine ligand 5	HGNC:10632	17q12	hDG10G13	human	NM_002985	28.0773	28.9002	40.405	-1.23861	-1.25087	-1.16669	32.4608	-1.57346	0.0292469	0.184456	-1	0	-1	0	NA
6354	CCL7	CCL7	C-C motif chemokine ligand 7	HGNC:10634	17q11.2-q12	hDG09F11	human	NM_006273	60.5286	53.1873	64.8073	-0.400784	-0.505868	-0.0606284	59.5077	-0.818251	0.256881	0.399094	0	0	0	0	0.00326797
6355	CCL8	CCL8	C-C motif chemokine ligand 8	HGNC:10635	17q11.2	hDG09H18	human	NM_005623	37.1889	38.3462	38.0325	-1.23168	-1.1155	-1.061	37.8559	-1.42282	0.0486735	0.223049	-1	0	-1	0	0.00653595
8900	CCNA1	CCNA1	cyclin A1	HGNC:1577	13q12.3-q13	hDG04K09	human	NM_003914	120	59.9784	44.7062	0.776686	0.0976237	-0.960918	74.8949	-0.388608	0.590264	0.552385	0	0	0	0	0.0130719
890	CCNA2	CCNA2	cyclin A2	HGNC:1578	4q27	hDG04M09	human	NM_001237	61.8182	24.3075	72.978	-0.327026	-1.36673	0.175552	53.0346	-0.998995	0.166295	0.346968	0	0	0	0	0.00653595
891	CCNB1	CCNB1	cyclin B1	HGNC:1579	5q12	hDG04O09	human	NM_031966	13.3333	73.8143	70.9094	-1.24679	0.665616	0.092396	52.6857	-1.00874	0.162207	0.344906	0	0	0	0	0.00980392
57820	CCNB1IP1	CCNB1IP1	cyclin B1 interacting protein 1	HGNC:19437	14q11.2	hDG18G19	human	NM_021178	56.9623	42.3193	48.5662	-0.140154	-0.183952	-0.0293257	49.2826	-1.10376	0.12617	0.318319	0	0	0	0	0.0130719
9133	CCNB2	CCNB2	cyclin B2	HGNC:1580	15q21.3	hDG04A11	human	NM_004701	34.8822	59.1136	104.008	-0.838004	0.0621241	1.4229	66.0013	-0.636937	0.377485	0.46655	0	0	0	0	NA
85417	CCNB3	CCNB3	cyclin B3	HGNC:18709	Xp11	hDG04C11	human	NM_033031	144.781	80.3	114.351	1.24679	0.931862	1.83868	113.144	0.679395	0.346514	0.450898	0	0	0	0	0.0163399
595	CCND1	CCND1	cyclin D1	HGNC:1582	11q13	hDG04E11	human	NM_053056	88.7542	43.9805	46.0853	0.183952	-0.559117	-0.905481	59.6067	-0.815487	0.258498	0.399998	0	0	0	0	0.00326797
894	CCND2	CCND2	cyclin D2	HGNC:1583	12p13	hDG04M22	human	NM_001759	127.542	93.055	101.48	0.91976	1.45548	1.32126	107.359	0.517858	0.473027	0.508503	0	0	0	0	NA
896	CCND3	CCND3	cyclin D3	HGNC:1585	6p21	hDG04O22	human	NM_001760	51.0438	51.5471	53.4406	-0.531417	-0.248497	-0.609814	52.0105	-1.02759	0.15449	0.340444	0	0	0	0	NA
898	CCNE1	CCNE1	cyclin E1	HGNC:1589	19q12	hDG04G11	human	NM_001238	109.226	59.3298	78.2646	0.572295	0.070999	0.388063	82.2733	-0.182585	0.800271	0.616145	0	0	0	0	0.00980392
9134	CCNE2	CCNE2	cyclin E2	HGNC:1590	8q22.1	hDG04I11	human	NM_004702	288.081	70.1392	71.3691	3.96519	0.514743	0.110875	143.196	1.51852	0.035445	0.199216	1	0	1	1	0.00980392
899	CCNF	CCNF	cyclin F	HGNC:1591	16p13.3	hDG19J17	human	NM_001761	125.78	98.8353	94.1896	0.78826	0.158214	-0.133123	106.268	0.487407	0.499441	0.518454	0	0	0	0	NA
900	CCNG1	CCNG1	cyclin G1	HGNC:1592	5q32-q34	hDG04K11	human	NM_004060	100.606	56.7356	99.6409	0.408782	-0.0354995	1.24735	85.6608	-0.0879993	0.902951	0.641264	0	0	0	0	0.00326797
901	CCNG2	CCNG2	cyclin G2	HGNC:1593	4q21.22	hDG04M11	human	NM_004354	186.801	92.4064	167.217	2.04391	1.42886	3.96379	148.808	1.67522	0.0202877	0.159325	1	0	1	1	0.00326797
902	CCNH	CCNH	cyclin H	HGNC:1594	5q13.3-q14	DDRP06	human	NM_001239	73.4558	85.1843	42.5065	-0.76306	-0.358204	-1.48823	67.0489	-0.607686	0.399774	0.475768	0	0	0	0	NA
902	CCNH	CCNH	cyclin H	HGNC:1594	5q13.3-q14	hDG04K07	human	NM_001239	194.343	90.0284	68.6108	2.18699	1.33123	0	117.661	0.805511	0.264412	0.403628	0	0	0	0	NA
10983	CCNI	CCNI	cyclin I	HGNC:1595	4q21.1	hDG04O11	human	NM_006835	53.1987	107.107	84.4706	-0.490539	2.03235	0.637532	81.5921	-0.201606	0.779976	0.611605	0	0	0	0	NA
54619	CCNJ	CCNJ	cyclin J	HGNC:23434	10q23.33	hDG04A13	human	NM_019084	139.394	80.9485	98.4916	1.14459	0.958487	1.20115	106.278	0.487677	0.49921	0.518454	0	0	0	0	0.00653595
8812	CCNK	CCNK	cyclin K	HGNC:1596	14q32.2	hDG04M07	human	NM_003858	72.5926	36.1978	35.0524	-0.122635	-0.878613	-1.34898	47.9476	-1.14103	0.113875	0.305536	0	0	0	0	0.00326797
81669	CCNL2	CCNL2	cyclin L2	HGNC:20570	1p36.33	hDG04A09	human	NM_030937	61.8182	88.9474	88.1483	-0.327026	1.28686	0.785366	79.638	-0.256171	0.722618	0.59778	0	0	0	0	0.00326797
1230	CCR1	CCR1	C-C motif chemokine receptor 1	HGNC:1602	3p21	hDG08D21	human	NM_001295	74.8399	94.2188	93.2745	-0.603492	-0.0667079	0.221984	87.4444	-0.038199	0.957787	0.653159	0	0	0	0	0.00326797
2826	CCR10	CCR10	C-C motif chemokine receptor 10	HGNC:4474	17q21.1-q21.3	hDG08O09	human	NM_016602	179.785	118.219	124.437	3.03166	0.644843	1.31483	140.814	1.45198	0.0442418	0.216836	1	0	1	1	0.00326797
1231	CCR2	CCR2	C-C motif chemokine receptor 2	HGNC:1603	3p21	hDG08A11	human	NM_000647	134.691	107.219	143.914	1.46968	0.318715	1.99786	128.608	1.11117	0.123647	0.314585	0	0	0	0	0.00653595
1232	CCR3	CCR3	C-C motif chemokine receptor 3	HGNC:1604	3p21.3	hDG08C11	human	NM_001837	69.5106	84.2188	62.112	-0.788089	-0.363187	-0.870861	71.9471	-0.470916	0.514065	0.525365	0	0	0	0	0.00980392
1233	CCR4	CCR4	C-C motif chemokine receptor 4	HGNC:1605	3p24-p21.3	hDG08J10	human	NM_005508	115.014	144.719	103.987	0.788089	1.43051	0.59765	121.24	0.905443	0.209626	0.374647	0	0	0	0	0.00326797
1234	CCR5	CCR5	C-C motif chemokine receptor 5 (gene/pseudogene)	HGNC:1606	3p21	hDG08E11	human	NM_000579	79.3492	93.7188	79.154	-0.447294	-0.0815319	-0.273211	84.074	-0.132307	0.854538	0.62874	0	0	0	0	NA
1235	CCR6	CCR6	C-C motif chemokine receptor 6	HGNC:1607	6q27	hDG08G11	human	NM_004367	55.9826	136.219	148.783	-1.25668	1.17851	2.16862	113.661	0.693836	0.336378	0.445644	0	0	0	0	0.00326797
1236	CCR7	CCR7	C-C motif chemokine receptor 7	HGNC:1608	17q12-q21.2	hDG08I11	human	NM_001838	121.573	108.219	86.4577	1.01529	0.348363	-0.0170757	105.417	0.463623	0.520605	0.52853	0	0	0	0	0.00326797
1237	CCR8	CCR8	C-C motif chemokine receptor 8	HGNC:1609	3p22	hDG08F21	human	NM_005201	94.1071	104.219	49.9391	0.0638991	0.229772	-1.29775	82.755	-0.169137	0.814706	0.620153	0	0	0	0	NA
10803	CCR9	CCR9	C-C motif chemokine receptor 9	HGNC:1610	3p21.31	hDG08H21	human	NM_031200	76.0697	91.2188	80.6147	-0.560892	-0.155652	-0.221984	82.6344	-0.172504	0.811082	0.619496	0	0	0	0	NA
9034	CCRL2	CCRL2	C-C motif chemokine receptor like 2	HGNC:1612	3p21	hDG08M11	human	NM_003965	39.9949	97.2188	64.0596	-1.81048	0.022236	-0.802559	67.0911	-0.606507	0.400693	0.476225	0	0	0	0	0.00326797
9973	CCS	CCS	copper chaperone for superoxide dismutase	HGNC:1613	11q13.2	hDG03E07	human	NM_005125	47.5204	66.1197	17.509	-0.306019	0.499383	-1.57169	43.7164	-1.25918	0.0810376	0.27037	0	0	0	0	NA
10576	CCT2	CCT2	chaperonin containing TCP1 subunit 2	HGNC:1615	12q15	K03A08	human	NM_006431	122.619	105.054	119.515	0.444177	0.0391009	0.501755	115.729	0.751577	0.297686	0.425432	0	0	0	0	0.00653595
10575	CCT4	CCT4	chaperonin containing TCP1 subunit 4	HGNC:1617	2p15	hDG03G07	human	NM_006430	34.9922	52.8676	31.3077	-0.868095	-0.188079	-1.02446	39.7225	-1.3707	0.0575351	0.235388	0	0	0	0	0.00326797
10574	CCT7	CCT7	chaperonin containing TCP1 subunit 7	HGNC:1622	2p13.2	hDG03I07	human	NM_001009570	15.2253	25.3633	46.7108	-1.75493	-1.61489	-0.413603	29.0998	-1.66731	0.0208801	0.160584	-1	0	-1	0	0.00653595
10694	CCT8	CCT8	chaperonin containing TCP1 subunit 8	HGNC:1623	21q21.3	hDG03K07	human	NM_006585	28.8672	28.6138	18.1508	-1.14289	-1.44626	-1.54624	25.2106	-1.7759	0.0138704	0.138249	-1	0	-1	0	NA
929	CD14	CD14	CD14 molecule	HGNC:1628	5q31.3	hDG07G15	human	NM_000591	150.558	63.687	54.959	2.32668	-0.362413	-0.634422	89.7347	0.0257524	0.971536	0.656496	0	0	0	0	0.00326797
977	CD151	CD151	CD151 molecule (Raph blood group)	HGNC:1630	11p15.5	hDG09F13	human	NM_004357	45.9756	35.5042	34.3813	-0.918871	-1.23224	-1.19741	38.6204	-1.40147	0.0521538	0.229779	0	0	0	0	NA
9332	CD163	CD163	CD163 molecule	HGNC:1631	12p13	hDG05B22	human	NM_203416	137.139	88.0461	162.571	1.33292	-0.154401	2.92279	129.252	1.12916	0.117693	0.307842	0	0	0	0	0.0457516
283316	CD163L1	CD163L1	CD163 molecule like 1	HGNC:30375	12p13.31	hDG05D17	human	NM_174941	110.244	141.734	74.1314	0.481779	1.40587	0.112415	108.703	0.55539	0.441566	0.49619	0	0	0	0	0.0392157
8763	CD164	CD164	CD164 molecule	HGNC:1632	6q21	hDG01P13	human	NM_006016	93.4928	76.8168	72.4609	1.22917	0.411702	0.733142	80.9235	-0.220276	0.760195	0.608452	0	0	0	0	NA
4064	CD180	CD180	CD180 molecule	HGNC:6726	5q12	hDG05P09	human	NM_005582	167.586	74.6243	49.8737	2.29648	-0.544468	-0.658431	97.3614	0.238707	0.740845	0.602225	0	0	0	0	0.00980392
909	CD1A	CD1A	CD1a molecule	HGNC:1634	1q23.1	hDG06O09	human	NM_001763	48.1772	33.7064	34.9736	-0.281655	-0.566572	-0.364225	38.9524	-1.3922	0.0537287	0.230712	0	0	0	0	0.0130719
910	CD1B	CD1B	CD1b molecule	HGNC:1635	1q23.1	hDG06A11	human	NM_001764	144.788	119.623	120.269	1.81347	1.29257	2.09092	128.227	1.10053	0.127282	0.319412	0	0	0	0	0.00326797
911	CD1C	CD1C	CD1c molecule	HGNC:1636	1q23.1	hDG07C15	human	NM_001765	98.9243	70.5466	47.8312	0.358903	0.0402681	-0.888191	72.434	-0.45732	0.526293	0.529552	0	0	0	0	0.00653595
912	CD1D	CD1D	CD1d molecule	HGNC:1637	1q23.1	hDG07E15	human	NM_001766	51.8368	49.6249	72.966	-1.43561	-1.18791	0.00667813	58.1426	-0.856369	0.235383	0.38627	0	0	0	0	0.0130719
913	CD1E	CD1E	CD1e molecule	HGNC:1638	1q23.1	hDG06C11	human	NM_030893	104.913	74.9646	201.347	0.948734	0.326208	4.42466	127.075	1.06837	0.138819	0.329973	0	0	0	0	0.0261438
914	CD2	CD2	CD2 molecule	HGNC:1639	1p13	hDG06J11	human	NM_001767	14.6824	19.8782	26.0691	-1.00803	-0.865801	-0.620531	20.2099	-1.91553	0.00795352	0.106625	-1	-1	-1	0	0.00326797
4345	CD200	CD200	CD200 molecule	HGNC:7203	3q13.2	hDG07O04	human	NM_001004196	49.8884	92.4973	42.5791	-1.50987	1.32885	-1.07518	61.6549	-0.758296	0.293395	0.422589	0	0	0	0	0.00326797
131450	CD200R1	CD200R1	CD200 receptor 1	HGNC:24235	3q13	hDG06P16	human	NM_138806	121.091	88.5662	60.2812	1.29957	0.620531	0.364225	89.9794	0.0325847	0.963988	0.65467	0	0	0	0	0.00653595
344807	CD200R2	CD200R1L	CD200 receptor 1 like	HGNC:24665	3q13.2	hDG06B18	human	NM_001008784	107.875	103.528	162.449	1.01297	0.944287	3.305	124.617	0.99975	0.165979	0.346968	0	0	0	0	0.00326797
50489	CD207	CD207	CD207 molecule	HGNC:17935	2p13	hDG05K16	human	NM_015717	38.6933	75.1835	100.411	-1.78258	-0.528216	0.947499	71.4291	-0.485379	0.501235	0.519324	0	0	0	0	0.00326797
933	CD22	CD22	CD22 molecule	HGNC:1643	19q13.1	hDG03O17	human	NM_001771	54.4806	68.12	89.0694	0.00624528	0.60315	1.26626	70.5567	-0.50974	0.479993	0.511368	0	0	0	0	0.00326797
51744	CD244	CD244	CD244 molecule	HGNC:18171	1q23.1	hDG06L11	human	NM_016382	24.4802	57.0558	47.1588	-0.795553	-0.0613173	-0.0134898	42.8983	-1.28202	0.0756735	0.261895	0	0	0	0	NA
919	CD247	CD247	CD247 molecule	HGNC:1677	1q24.2	hDG05J21	human	NM_000734	103.647	100.35	56.9488	0.273008	0.20316	-0.433601	86.9819	-0.0511124	0.943539	0.648781	0	0	0	0	0.00326797
57124	CD248	CD248	CD248 molecule	HGNC:18219	11q13	hDG05K05	human	NM_020404	55.4393	98.6718	45.3253	-1.25263	0.154401	-0.802965	66.4788	-0.623603	0.387547	0.469996	0	0	0	0	0.00980392
939	TNFRSF7	CD27	CD27 molecule	HGNC:11922	12p13	hDG06P21	human	NM_001242	61.6206	63.1765	57.4692	0.00988265	0.0711281	0.283286	60.7555	-0.783411	0.277691	0.413393	0	0	0	0	0.00653595
940	CD28	CD28	CD28 molecule	HGNC:1653	2q33	hDG05G16	human	NM_006139	43.7678	96.4348	61.4972	-1.62199	0.0893903	-0.289067	67.2333	-0.602537	0.403782	0.476879	0	0	0	0	0.00653595
11314	CD300A	CD300A	CD300a molecule	HGNC:19319	17q25.2	hDG06D03	human	NM_007261	21.9738	21.465	4.51084	-0.849908	-0.831463	-1.24106	15.9832	-2.03355	0.0048396	0.0845271	-1	-1	-1	0	0.00326797
10871	CD300C	CD300C	CD300c molecule	HGNC:19320	17q25.2	hDG06F03	human	NM_006678	64.3549	57.2825	15.29	0.0691785	-0.056412	-0.930797	45.6425	-1.2054	0.0948835	0.286194	0	0	0	0	NA
342510	CD300E	CD300E	CD300e molecule	HGNC:28874	17q25.1	hDG06H03	human	NM_181449	81.2162	37.5602	14.8213	0.434837	-0.483181	-0.944287	44.5326	-1.23639	0.086694	0.277849	0	0	0	0	0.00653595
124599	CD300LB	CD300LB	CD300 molecule like family member b	HGNC:30811	17q25.1	hDG06J03	human	NM_174892	3.28966	11.2638	26.0691	-1.2551	-1.05221	-0.620531	13.5409	-2.10174	0.00359139	0.0714955	-1	-1	-1	0	0.00326797
146722	CD300LF	CD300LF	CD300 molecule like family member f	HGNC:29883	17q25.2	hDG07G06	human	NM_139018	104.77	81.522	30.9496	0.581671	0.684558	-1.48922	72.4137	-0.457887	0.525788	0.529505	0	0	0	0	NA
146894	CD300LG	CD300LG	CD300 molecule like family member g	HGNC:30455	17q21.31	hDG07I06	human	NM_145273	74.8934	78.0922	89.4725	-0.556919	0.483217	0.594353	80.8194	-0.223184	0.757128	0.607233	0	0	0	0	NA
9936	CD302	CD302	CD302 molecule	HGNC:30843	2q24.2	hDG06C03	human	NM_014880	83.4947	90.3797	240.246	0.48425	0.659775	5.54431	138.04	1.37454	0.0568836	0.234906	0	0	0	0	NA
51293	CD320	CD320	CD320 molecule	HGNC:16692	19p13.2	hDG05J18	human	NM_016579	107.199	153.478	38.7555	0.385423	1.74717	-1.01174	99.8109	0.307102	0.67047	0.580966	0	0	0	0	NA
945	CD33	CD33	CD33 molecule	HGNC:1659	19q13.3	hDG05B21	human	NM_001772	139.676	63.4394	54.422	1.41322	-0.869524	-0.513898	85.8459	-0.0828304	0.908629	0.641679	0	0	0	0	0.00326797
947	CD34	CD34	CD34 molecule	HGNC:1662	1q32	hDG03G14	human	NM_001773	49.7477	74.621	43.5018	-0.206094	0.940396	-0.540865	55.9568	-0.917399	0.20367	0.371423	0	0	0	0	0.00980392
948	CD36	CD36	CD36 molecule	HGNC:1663	7q11.2	hDG05G21	human	NM_001001547	146.781	129.43	89.7979	1.63805	1.0483	0.610254	122.003	0.926752	0.199105	0.368458	0	0	0	0	NA
951	CD37	CD37	CD37 molecule	HGNC:1666	19q13.33	hDG09H13	human	NM_001774	69.5898	110.973	66.43	-0.0782018	1.86782	0	82.3309	-0.180977	0.801994	0.616693	0	0	0	0	NA
952	CD38	CD38	CD38 molecule	HGNC:1667	4p15.32	hDG11D03	human	NM_001775	64.917	45.6291	33.8865	0.0518839	-0.260803	-1.16207	48.1442	-1.13554	0.115623	0.306053	0	0	0	0	0.00653595
915	CD3D	CD3D	CD3d molecule	HGNC:1673	11q23	hDG06P13	human	NM_000732	60.4813	68.1638	89.8067	-0.014824	0.179047	1.21408	72.8173	-0.446619	0.536013	0.532621	0	0	0	0	0.00326797
916	CD3E	CD3E	CD3e molecule	HGNC:1674	11q23	hDG06L13	human	NM_000733	64.3549	40.9606	33.099	0.0691785	-0.4096	-0.418184	46.1382	-1.19156	0.0987341	0.289967	0	0	0	0	NA
917	CD3G	CD3G	CD3g molecule	HGNC:1675	11q23	hDG06B15	human	NM_000073	121.319	160.201	136.673	1.30451	2.17063	2.56306	139.397	1.41244	0.0503415	0.226632	0	0	0	0	NA
920	CD4	CD4	CD4 molecule	HGNC:1678	12p13.31	hDG06D15	human	NM_000616	143.876	120.077	28.8811	1.7937	1.30238	-0.539593	97.6113	0.245684	0.733553	0.600705	0	0	0	0	NA
958	CD40	CD40	CD40 molecule	HGNC:11919	20q12-q13.2	hDG06B19	human	NM_001250	150.028	138.439	215.407	1.92712	1.69972	4.82935	167.958	2.20992	0.00220075	0.0560772	1	0	1	1	0.0130719
959	CD40LG	CD40LG	CD40 ligand	HGNC:11935	Xq26	hDG10G17	human	NM_000074	47.6094	48.167	46.05	-0.502802	-0.699018	-0.957048	47.2754	-1.1598	0.108047	0.300222	0	0	0	0	0.00980392
961	CD47	CD47	CD47 molecule	HGNC:1682	3q13.1-q13.2	hDG05M20	human	NM_001777	80.8119	29.8847	116.582	-0.449661	-1.84469	1.4614	75.7597	-0.364461	0.613564	0.562226	0	0	0	0	NA
962	CD48	CD48	CD48 molecule	HGNC:1683	1q21.3-q22	hDG06N11	human	NM_001778	48.1772	30.0793	48.0961	-0.281655	-0.645058	0.0134898	42.1175	-1.30382	0.0708292	0.254895	0	0	0	0	0.00326797
921	CD5	CD5	CD5 molecule	HGNC:1685	11q13	hDG05D22	human	NM_014207	82.8417	77.9797	106.475	-0.385423	-0.446952	1.14021	89.0988	0.00799731	0.991158	0.662861	0	0	0	0	NA
963	CD53	CD53	CD53 molecule	HGNC:1686	1p13	hDG09J13	human	NM_000560	55.8606	69.923	30.7302	-0.566963	0.181594	-1.33382	52.1713	-1.0231	0.156304	0.341243	0	0	0	0	0.00326797
966	CD59	CD59	CD59 molecule	HGNC:1689	11p13	hDG09P20	human	NM_000611	86.8886	74.3438	102.535	0.537638	0.363187	1.34898	87.9226	-0.0248447	0.972537	0.656826	0	0	0	0	NA
922	CD5L	CD5L	CD5 molecule like	HGNC:1690	1q23.1	hDG05F22	human	NM_005894	69.1405	114.331	96.873	-0.819024	0.60948	0.835084	93.4481	0.129437	0.857661	0.629375	0	0	0	0	0.0130719
923	CD6	CD6	CD6 molecule	HGNC:1691	11q12.2	hDG05H22	human	NM_006725	78.7821	89.1646	92.3247	-0.513898	-0.121896	0.69055	86.7571	-0.0573878	0.936619	0.64799	0	0	0	0	0.00326797
967	CD63	CD63	CD63 molecule	HGNC:1692	12q13.2	hDG09L13	human	NM_001780	103.913	39.6092	96.0446	1.1437	-1.06362	1.10647	79.8556	-0.250095	0.728941	0.598813	0	0	0	0	NA
969	CD69	CD69	CD69 molecule	HGNC:1694	12p13	hDG05C08	human	NM_001781	50.8722	58.4062	39.7663	-1.39716	-1.0158	-0.979618	49.6815	-1.09262	0.130039	0.321633	0	0	0	0	0.00326797
924	CD7	CD7	CD7 molecule	HGNC:1695	17q25.2-q25.3	hDG06N16	human	NM_006137	23.1131	38.2403	20.9139	-0.825201	-0.468464	-0.768919	27.4224	-1.71414	0.017547	0.151146	-1	0	-1	0	0.00653595
970	TNFSF7	CD70	CD70 molecule	HGNC:11937	19p13	hDG09N06	human	NM_001252	68.2169	78.4488	74.9493	-0.127078	0.53181	0.318299	73.8717	-0.417178	0.563222	0.544066	0	0	0	0	NA
974	CD79B	CD79B	CD79b molecule	HGNC:1699	17q23	hDG05I09	human	NM_000626	89.4386	160.748	78.1744	-0.176652	1.95846	0.24089	109.454	0.576348	0.424537	0.488659	0	0	0	0	NA
941	CD80	CD80	CD80 molecule	HGNC:1700	3q13.3-q21	hDG06J07	human	NM_005191	68.2284	62.2698	11.0721	0.153181	0.0515066	-1.05221	47.1901	-1.16219	0.107333	0.299141	0	0	0	0	0.0163399
975	CD81	CD81	CD81 molecule	HGNC:1701	11p15.5	hDG09P13	human	NM_004356	55.3115	62.3446	54.6653	-0.586514	-0.12971	-0.439556	57.4405	-0.875973	0.224834	0.381196	0	0	0	0	NA
3732	CD82	CD82	CD82 molecule	HGNC:6210	11p11.2	hDG09B15	human	NM_002231	88.8107	58.2396	90.3651	0.606064	-0.298332	0.894269	79.1385	-0.270118	0.708192	0.592095	0	0	0	0	NA
8832	CD84	CD84	CD84 molecule	HGNC:1704	1q24	hDG05F21	human	NM_003874	118.871	41.6288	44.82	0.754787	-1.50338	-0.819024	68.4399	-0.568845	0.430591	0.491887	0	0	0	0	0.00980392
942	CD86	CD86	CD86 molecule	HGNC:1705	3q21	hDG06L07	human	NM_175862	52.7343	28.7192	36.8483	-0.182829	-0.674491	-0.310266	39.4339	-1.37875	0.0560834	0.23376	0	0	0	0	0.00326797
925	CD8A	CD8A	CD8a molecule	HGNC:1706	2p12	hDG06H13	human	NM_171827	33.1387	10.8104	66.3738	-0.607783	-1.06202	0.539593	36.7743	-1.45302	0.044089	0.216799	-1	0	-1	0	0.00653595
926	CD8B	CD8B	CD8b molecule	HGNC:1707	2p12	hDG05K09	human	NM_172101	96.543	60.6431	85.2495	0.0481779	-0.950788	0.46572	80.8119	-0.223393	0.756909	0.607233	0	0	0	0	0.00326797
928	CD9	CD9	CD9 molecule	HGNC:1709	12p13	hDG02E18	human	NM_001769	44.3615	75.4428	87.0509	-0.532493	0.71456	1.34409	68.9518	-0.554553	0.442247	0.496475	0	0	0	0	0.00326797
22918	CD93	CD93	CD93 molecule	HGNC:15855	20p11.21	hDG05M05	human	NM_012072	96.0355	119.364	42.2931	0.0321186	0.755755	-0.899321	85.8975	-0.081391	0.910209	0.642387	0	0	0	0	0.00653595
4267	CD99	CD99	CD99 molecule	HGNC:7082	Xp22.32 and Yp11.3	hDG02G18	human	NM_002414	62.2669	64.2467	48.2485	0.159748	0.287159	-0.239493	58.254	-0.853257	0.237088	0.387165	0	0	0	0	0.00326797
83692	CD99L2	CD99L2	CD99 molecule like 2	HGNC:18237	Xq28	hDG02I18	human	NM_031462	45.7389	39.0553	27.8892	-0.479243	-0.674491	-1.07039	37.5611	-1.43105	0.0473855	0.219899	-1	0	-1	0	0.00326797
978	CDA	CDA	cytidine deaminase	HGNC:1712	1p36.2-p35	hDG11F03	human	NM_001785	30.2089	40.5847	53.7032	-1.14886	-0.458654	-0.349435	41.4989	-1.32109	0.0671752	0.249973	0	0	0	0	NA
8556	CDC14A	CDC14A	cell division cycle 14A	HGNC:1718	1p21	hDG27A13	human	NM_003672	124.464	164.089	110.242	1.31439	0.823275	-0.0554376	132.932	1.23191	0.0878401	0.27925	0	0	0	0	0.00653595
8555	CDC14B	CDC14B	cell division cycle 14B	HGNC:1719	9q22.3	K02D17	human	NM_033332	64.3786	87.6771	177.699	-0.149887	-0.140519	3.08497	109.918	0.589315	0.414208	0.483368	0	0	0	0	NA
168448	CDC14C	CDC14C	cell division cycle 14C, pseuodgene	HGNC:22427	7p12.3	hDG27M11	human	NM_152627	45.9172	127.931	168.046	-1.2798	0.188461	0.896241	113.965	0.702308	0.330526	0.444427	0	0	0	0	NA
8881	CDC16	CDC16	cell division cycle 16	HGNC:1720	13q34	hDG20I05	human	NM_003903	44.0741	62.4473	50.5665	-1.41924	-0.873772	-0.593955	52.3626	-1.01776	0.158474	0.342941	0	0	0	0	NA
991	CDC20	CDC20	cell division cycle 20	HGNC:1723	1p34.1	hDG19P15	human	NM_001255	64.5035	111.481	215.116	-0.967041	0.474642	2.93758	130.367	1.16029	0.10795	0.300222	0	0	0	0	0.00653595
8697	CDC23	CDC23	cell division cycle 23	HGNC:1724	5q31	hDG20G11	human	NM_004661	66	88.1013	61.4426	-0.899321	-0.291257	-0.231542	71.848	-0.473685	0.511595	0.524013	0	0	0	0	0.00326797
993	CDC25A	CDC25A	cell division cycle 25A	HGNC:1725	3p21	hDG27J11	human	NM_001789	138.864	15.5014	9.22483	1.78999	-1.78542	-1.71857	54.5302	-0.957234	0.184774	0.360002	0	0	0	0	NA
994	CDC25B	CDC25B	cell division cycle 25B	HGNC:1726	20p13	hDG27L11	human	NM_212530	114.777	125.106	137.741	0.994442	0.138866	0.397303	125.875	1.03486	0.151598	0.338814	0	0	0	0	0.00980392
995	CDC25C	CDC25C	cell division cycle 25C	HGNC:1727	5q31	hDG27N11	human	NM_001790	61.3648	120.021	122.027	-0.769611	0.0495949	0.138594	101.138	0.34415	0.633463	0.570097	0	0	0	0	NA
246184	CDC26	CDC26	cell division cycle 26	HGNC:17839	9q32	hDG19G16	human	NM_139286	69.6099	56.2396	51.5509	-0.820766	-0.907648	-1.21586	59.1335	-0.8287	0.250857	0.3957	0	0	0	0	NA
996	CDC27	CDC27	cell division cycle 27	HGNC:1728	17q21.32	hDG19B17	human	NM_001256	34.4326	48.2529	54.3469	-1.82844	-1.1075	-1.14486	45.6775	-1.20442	0.095147	0.286194	0	0	0	0	NA
997	CDC34	CDC34	cell division cycle 34	HGNC:1734	19p13.3	hDG20A09	human	NM_004359	83.1852	164.388	148.452	-0.491816	1.44096	2.66776	132.008	1.20612	0.0946941	0.286194	0	0	0	0	0.00326797
11140	CDC37	CDC37	cell division cycle 37	HGNC:1735	19p13.2	hDG03M07	human	NM_007065	28.8672	64.1194	51.5243	-1.14289	0.395615	-0.222709	48.1703	-1.13482	0.115857	0.306498	0	0	0	0	0.00326797
55664	CDC37L1	CDC37L1	cell division cycle 37 like 1	HGNC:17179	9p24.1	hDG03L07	human	NM_017913	72.2986	62.8692	46.069	0.805642	0.33076	-0.439055	60.4123	-0.792994	0.271858	0.408274	0	0	0	0	NA
998	CDC42	CDC42	cell division cycle 42	HGNC:1736	1p36.1	hDG04O21	human	NM_001791	105.993	80.9485	72.2885	0.510978	0.958487	0.147834	86.4101	-0.0670785	0.925946	0.645851	0	0	0	0	0.00326797
8476	CDC42BPA	CDC42BPA	CDC42 binding protein kinase alpha	HGNC:1737	1q42.11	K01E22	human	NM_003607	83.3101	54.686	72.0262	-0.788489	-1.16698	-0.946161	70.0074	-0.525077	0.466879	0.505641	0	0	0	0	0.00653595
9578	CDC42BPB	CDC42BPB	CDC42 binding protein kinase beta	HGNC:1738	14q32.32	K01D10	human	NM_006035	87.7793	85.2174	82.8698	-0.674491	-0.321186	-0.674491	85.2889	-0.0983858	0.891562	0.638998	0	0	0	0	0.00980392
55561	CDC42BPG	CDC42BPG	CDC42 binding protein kinase gamma	HGNC:29829	11q13	K02I22	human	NM_017525	57.4422	33.2861	90.2045	-0.374717	-1.4895	0.541804	60.3109	-0.795823	0.270158	0.407305	0	0	0	0	0.00326797
8318	CDC45L	CDC45	cell division cycle 45	HGNC:1739	22q11.21	hDG23H04	human	NM_003504	102.725	123.872	96.826	-0.463287	0.0793519	-0.384387	107.808	0.530394	0.46238	0.504646	0	0	0	0	0.00980392
990	CDC6	CDC6	cell division cycle 6	HGNC:1744	17q21.3	hDG23M19	human	NM_001254	97.4078	132.011	82.316	-0.599547	0.277731	-0.761522	103.912	0.4216	0.559099	0.542923	0	0	0	0	0.00653595
8317	CDC7	CDC7	cell division cycle 7	HGNC:1745	1p22	K01M20	human	NM_003503	124.278	81.3527	123.627	0.256496	-0.428248	0.346613	109.753	0.584698	0.417842	0.484803	0	0	0	0	0.00326797
79577	CDC73	CDC73	cell division cycle 73	HGNC:16783	1q25	hDG01D09	human	NM_024529	39.5918	45.3731	30.7349	-1.49542	-1.18255	-1.57102	38.5666	-1.40297	0.0519023	0.229505	0	0	0	0	0.00326797
999	CDH1	CDH1	cadherin 1	HGNC:1748	16q22.1	hDG18L14	human	NM_004360	37.5213	57.897	44.4485	-1.01612	0.604414	-0.234605	46.6223	-1.17804	0.102616	0.293939	0	0	0	0	0.00980392
1008	CDH10	CDH10	cadherin 10	HGNC:1749	5p14.2	hDG02K18	human	NM_006727	58.594	72.9937	61.4222	0.0177498	0.621066	0.298144	64.3366	-0.683418	0.343655	0.449272	0	0	0	0	0.0751634
1009	CDH11	CDH11	cadherin 11	HGNC:1750	16q21	hDG03A19	human	NM_001797	72.0202	64.8695	69.4946	0.793151	0.434528	0.48996	68.7948	-0.558936	0.438643	0.495256	0	0	0	0	0.0294118
1010	CDH12	CDH12	cadherin 12	HGNC:1751	5p14.3	hDG02M18	human	NM_004061	94.4046	50.2515	42.979	1.40223	-0.247091	-0.454548	62.545	-0.733442	0.309503	0.433504	0	0	0	0	0.0294118
1012	CDH13	CDH13	cadherin 13	HGNC:1753	16q23.3	hDG02O18	human	NM_001257	109.555	83.4901	86.8114	1.98797	1.02175	1.33432	93.2856	0.1249	0.862599	0.630868	0	0	0	0	0.0130719
1013	CDH15	CDH15	cadherin 15	HGNC:1754	16q24.3	hDG02A20	human	NM_004933	72.8264	73.6934	89.9251	0.567992	0.647778	1.4614	78.815	-0.27915	0.698902	0.589289	0	0	0	0	0.00653595
1014	CDH16	CDH16	cadherin 16	HGNC:1755	16q22.1	hDG03I14	human	NM_004062	51.6965	61.869	56.9795	-0.11866	0.278876	-0.00636312	56.8484	-0.892505	0.216206	0.377367	0	0	0	0	0.00980392
1015	CDH17	CDH17	cadherin 17	HGNC:1756	8q22.1	hDG03K14	human	NM_004063	71.185	62.1191	43.8227	0.755679	0.291847	-0.528139	59.0423	-0.831248	0.249404	0.395156	0	0	0	0	0.00653595
1016	CDH18	CDH18	cadherin 18	HGNC:1757	5p14.3	hDG02C20	human	NM_004934	87.977	55.1498	42.979	1.15373	-0.0601031	-0.454548	62.0353	-0.747675	0.300206	0.426667	0	0	0	0	0.0130719
28513	CDH19	CDH19	cadherin 19	HGNC:1758	18q22.1	hDG02E20	human	NM_021153	37.934	31.7079	51.6018	-0.780989	-0.954972	-0.10264	40.4145	-1.35137	0.0611441	0.238478	0	0	0	0	0.0457516
1000	CDH2	CDH2	cadherin 2	HGNC:1759	18q12.1	hDG02G20	human	NM_001792	65.4806	24.7103	54.7156	0.283996	-1.2221	0.0244381	48.3022	-1.13113	0.117045	0.307188	0	0	0	0	0.0163399
28316	CDH20	CDH20	cadherin 20	HGNC:1760	18q21.33	hDG03O14	human	NM_031891	88.7246	64.3694	85.2186	1.54259	0.408586	1.11355	79.4375	-0.261767	0.716817	0.595426	0	0	0	0	0.0130719
64405	CDH22	CDH22	cadherin 22	HGNC:13251	20q13.1	hDG03A16	human	NM_021248	74.5258	66.3697	43.8227	0.905566	0.512354	-0.528139	61.5728	-0.76059	0.291931	0.422568	0	0	0	0	NA
64072	CDH23	CDH23	cadherin related 23	HGNC:13733	10q22.1	hDG02I20	human	NM_022124	20.0287	35.2066	25.2545	-1.47323	-0.82141	-1.17792	26.8299	-1.73068	0.0164866	0.147886	-1	0	-1	0	0.00980392
64403	CDH24	CDH24	cadherin 24	HGNC:14265	14q11.2	hDG02M20	human	NM_022478	49.4118	78.2419	94.476	-0.337245	0.82141	1.64713	74.0432	-0.412388	0.567717	0.545615	0	0	0	0	0.0163399
60437	CDH26	CDH26	cadherin 26	HGNC:15902	20q13.33	hDG02O20	human	NM_177980	72.3673	89.0881	88.9671	0.550242	1.23545	1.4223	83.4742	-0.149056	0.83637	0.624197	0	0	0	0	0.00980392
1001	CDH3	CDH3	cadherin 3	HGNC:1762	16q22.1	hDG02A22	human	NM_001793	54.462	58.9985	55.6737	-0.141998	0.0868156	0.063539	56.378	-0.905638	0.209523	0.374647	0	0	0	0	0.0196078
1002	CDH4	CDH4	cadherin 4	HGNC:1763	20q13.3	hDG02C22	human	NM_001794	114.605	88.0385	77.9491	2.18322	1.19538	0.972635	93.531	0.131753	0.855141	0.628885	0	0	0	0	0.00326797
1003	CDH5	CDH5	cadherin 5	HGNC:1764	16q22.1	hDG02E22	human	NM_001795	55.3802	102.384	85.3743	-0.106499	1.74299	1.27567	81.046	-0.216855	0.76381	0.608452	0	0	0	0	0.0130719
1004	CDH6	CDH6	cadherin 6	HGNC:1765	5p13.3	hDG03C16	human	NM_004932	36.941	50.3672	63.3975	-0.780661	-0.317789	0.248162	50.2353	-1.07716	0.135562	0.327076	0	0	0	0	0.0228758
1005	CDH7	CDH7	cadherin 7	HGNC:1766	18q22.1	hDG03E16	human	NM_033646	44.458	60.8689	42.5391	-0.443415	0.226992	-0.579044	49.2887	-1.10359	0.126228	0.318319	0	0	0	0	0.0359477
1006	CDH8	CDH8	cadherin 8	HGNC:1767	16q22.1	hDG02G22	human	NM_001796	111.392	94.6862	87.2904	2.05897	1.44915	1.35387	97.7894	0.250658	0.728349	0.598608	0	0	0	0	0.0294118
1007	CDH9	CDH9	cadherin 9	HGNC:1768	5p14	hDG02I22	human	NM_016279	50.7891	73.3435	59.2665	-0.283996	0.634422	0.210167	61.133	-0.772868	0.28421	0.416309	0	0	0	0	0.0457516
92211	PCDH21	CDHR1	cadherin related family member 1	HGNC:14550	10q23.1	hDG02D04	human	NM_033100	83.8451	43.9536	42.5	0.993986	-0.487503	-0.474099	56.7662	-0.894799	0.215034	0.377167	0	0	0	0	0.00326797
54825	PCLKC	CDHR2	cadherin related family member 2	HGNC:18231	5q35.2	hDG02J18	human	NM_017675	39.7704	54.45	47.5299	-0.70999	-0.0868156	-0.268819	47.2501	-1.16051	0.107833	0.300167	0	0	0	0	0.00980392
222256	FLJ23834	CDHR3	cadherin related family member 3	HGNC:26308	7q22.2	hDG02P18	human	NM_152750	69.6126	64.5965	111.003	0.443744	0.300516	2.32162	81.7374	-0.19755	0.784291	0.612216	0	0	0	0	0.00326797
53841	MUCDHL	CDHR5	cadherin related family member 5	HGNC:7521	11p15.5	hDG02B19	human	NM_017717	73.7446	47.1026	86.5719	0.603492	-0.367297	1.32454	69.1397	-0.549306	0.446577	0.497442	0	0	0	0	0.00653595
983	CDC2	CDK1	cyclin dependent kinase 1	HGNC:1722	10q21.2	K01K16	human	NM_001786	87.4069	68.599	113.905	-0.683991	-0.781553	0.103047	89.9703	0.0323317	0.964267	0.65467	0	0	0	0	NA
8558	CDK10	CDK10	cyclin dependent kinase 10	HGNC:1770	16q24.3	K01D03	human	NM_003674	115.712	155.169	93.3396	0.0379995	1.61664	-0.412189	121.407	0.910111	0.207293	0.372897	0	0	0	0	NA
985	CDC2L2	CDK11A	cyclin dependent kinase 11A	HGNC:1730	1p36.33	K01D14	human	NM_033531	112.733	75.942	59.3129	-0.0379995	-0.578135	-1.26467	82.6626	-0.171717	0.811931	0.619606	0	0	0	0	0.00653595
985	CDC2L2	CDK11A	cyclin dependent kinase 11A	HGNC:1730	1p36.33	K02H16	human	NM_033536	64.3786	60.4816	75.7489	-0.149887	-0.81501	0.121629	66.8697	-0.612688	0.395901	0.473563	0	0	0	0	0.00653595
984	CDC2L1	CDK11B	cyclin dependent kinase 11B	HGNC:1729	1p36.33	K03C04	human	NM_001787	77.5063	67.3181	63.9471	-0.296118	-0.645165	-0.534657	69.5905	-0.536719	0.457058	0.502638	0	0	0	0	0.00653595
51755	CRKRS	CDK12	cyclin dependent kinase 12	HGNC:24224	17q12	K02E08	human	NM_016507	56.2861	75.2125	64.3367	-0.412189	-0.449661	-0.210087	65.2784	-0.65712	0.362543	0.458969	0	0	0	0	0.0163399
8621	CDC2L5	CDK13	cyclin dependent kinase 13	HGNC:1733	7p14.1	K01J03	human	NM_003718	233.403	77.8744	85.1133	3.03996	-0.524604	-0.618283	132.13	1.20953	0.0938119	0.285657	0	0	0	0	0.0130719
5218	PFTK1	CDK14	cyclin dependent kinase 14	HGNC:8883	7q21-q22	K02O15	human	NM_012395	94.4364	79.745	68.1408	0.824378	-0.337245	-0.099515	80.7741	-0.224448	0.755796	0.607142	0	0	0	0	0.00980392
65061	ALS2CR7	CDK15	cyclin dependent kinase 15	HGNC:14434	2q33.2	K01D18	human	NM_139158	193.925	148.599	206.637	2.03297	1.43463	2.42629	183.054	2.63142	0.000266798	0.0169491	1	0	1	1	0.00653595
5127	PCTK1	CDK16	cyclin dependent kinase 16	HGNC:8749	Xp11	K03O10	human	NM_033018	77.5063	101.819	63.9471	-0.296118	-0.0195505	-0.534657	81.0909	-0.215601	0.765134	0.608536	0	0	0	0	NA
5128	PCTK2	CDK17	cyclin dependent kinase 17	HGNC:8750	12q23.1	K01I09	human	NM_002595	253.142	181.836	121.757	3.54345	2.35536	0.299774	185.579	2.70192	0.0001819	0.0140595	1	1	1	1	0.00326797
5129	PCTK3	CDK18	cyclin dependent kinase 18	HGNC:8751	1q31-q32	K02M07	human	NM_212503	93.2803	49.1501	40.7513	0.786906	-1.09605	-0.895635	61.0606	-0.774891	0.282959	0.416093	0	0	0	0	0.00653595
23097	CDC2L6	CDK19	cyclin dependent kinase 19	HGNC:19338	6q21	K03I08	human	NM_015076	84.5238	59.7709	66.5932	-0.180961	-0.782018	-0.485304	70.296	-0.51702	0.473742	0.508694	0	0	0	0	0.00326797
1017	CDK2	CDK2	cyclin dependent kinase 2	HGNC:1771	12q13.2	K02G18	human	NM_001798	30.8526	95.6091	100.095	-1.23657	0.0562076	0.829292	75.5189	-0.371183	0.607034	0.559059	0	0	0	0	NA
23552	CCRK	CDK20	cyclin dependent kinase 20	HGNC:21420	9q22.1	K02G15	human	NM_012119	146.46	100.142	94.0086	2.5106	0.168623	0.652376	113.537	0.690352	0.33879	0.446899	0	0	0	0	NA
8099	CDK2AP1	CDK2AP1	cyclin dependent kinase 2 associated protein 1	HGNC:14002	12q24	hDG23O19	human	NM_004642	179.827	163.479	133.101	1.51249	1.0448	0.558449	158.802	1.95427	0.00677576	0.100073	1	0	1	0	NA
1018	CDK3	CDK3	cyclin dependent kinase 3	HGNC:1772	17q25.1	K01I12	human	NM_001258	192.435	108.406	109.418	1.99497	0.321186	-0.00936793	136.753	1.3386	0.0636449	0.244132	0	0	0	0	0.00326797
1019	CDK4	CDK4	cyclin dependent kinase 4	HGNC:1773	12q14.1	K01G21	human	NM_000075	195.787	142.415	142.323	2.08047	1.26333	0.81501	160.175	1.9926	0.00576708	0.0925435	1	0	1	1	0.00980392
1020	CDK5	CDK5	cyclin dependent kinase 5	HGNC:1774	7q36	K01D17	human	NM_004935	104.912	82.1256	97.4527	-0.237497	-0.406836	-0.309142	94.8299	0.168022	0.815902	0.620166	0	0	0	0	NA
8851	CDK5R1	CDK5R1	cyclin dependent kinase 5 regulatory subunit 1	HGNC:1775	17q12	hDG04E09	human	NM_003885	72.5926	47.0072	36.6614	-0.122635	-0.434869	-1.2843	52.0871	-1.02545	0.155353	0.341042	0	0	0	0	NA
8941	CDK5R2	CDK5R2	cyclin dependent kinase 5 regulatory subunit 2	HGNC:1776	2q35	hDG04G09	human	NM_003936	88.7542	71.6525	61.0257	0.183952	0.576867	-0.304907	73.8108	-0.418878	0.561635	0.543353	0	0	0	0	NA
1021	CDK6	CDK6	cyclin dependent kinase 6	HGNC:1777	7q21-q22	K01K12	human	NM_001259	106.029	106.087	137.836	-0.208997	0.256949	0.702595	116.651	0.777302	0.281459	0.415286	0	0	0	0	0.00326797
1022	CDK7	CDK7	cyclin dependent kinase 7	HGNC:1778	5q12.1	DDRN08	human	NM_001799	106.654	69.0634	88.1992	-0.170326	-0.693544	-0.435155	87.9722	-0.0234611	0.974066	0.657248	0	0	0	0	NA
1022	CDK7	CDK7	cyclin dependent kinase 7	HGNC:1778	5q12.1	K01M16	human	NM_001799	163.012	77.8744	112.783	1.24448	-0.524604	0.0749434	117.89	0.811908	0.260608	0.400821	0	0	0	0	NA
1024	CDK8	CDK8	cyclin dependent kinase 8	HGNC:1779	13q12.13	K02D06	human	NM_001260	72.4711	144.334	130.528	0.112415	1.26467	1.71387	115.778	0.75293	0.296833	0.424996	0	0	0	0	0.0163399
1025	CDK9	CDK9	cyclin dependent kinase 9	HGNC:1780	9q34.1	K03M21	human	NM_001261	32.3935	54.3801	33.9581	-1.03641	-0.879771	-1.09399	40.2439	-1.35614	0.0602373	0.238229	0	0	0	0	0.00326797
8814	CDKL1	CDKL1	cyclin dependent kinase like 1	HGNC:1781	14q21.3	K01L07	human	NM_004196	135.824	150.531	149.427	0.550992	1.48816	0.993	145.261	1.57617	0.0289703	0.184456	1	0	1	0	NA
8999	CDKL2	CDKL2	cyclin dependent kinase like 2	HGNC:1782	4q21.21	K01H05	human	NM_003948	159.288	135.845	151.671	1.14948	1.08133	1.04921	148.935	1.67874	0.0200186	0.158696	1	0	1	0	0.00980392
51265	CDKL3	CDKL3	cyclin dependent kinase like 3	HGNC:15483	5q31.1	K02I20	human	NM_016508	218.136	152.266	81.8355	4.83385	1.4614	0.298545	150.746	1.72932	0.016584	0.148099	1	0	1	1	NA
344387	CDKL4	CDKL4	cyclin dependent kinase like 4	HGNC:19287	2p22.3	K01I08	human	NM_001009565	205.843	73.2367	129.236	2.33697	-0.653078	0.487132	136.105	1.32051	0.0673238	0.249973	0	0	0	0	0.0130719
6792	CDKL5	CDKL5	cyclin dependent kinase like 5	HGNC:11411	Xp22	K01O19	human	NM_003159	109.008	63.9614	114.653	-0.132998	-0.910027	0.121783	95.8742	0.197181	0.784685	0.612255	0	0	0	0	0.0228758
1026	CDKN1A	CDKN1A	cyclin dependent kinase inhibitor 1A	HGNC:1784	6p21.1	hDG04I22	human	NM_000389	27.3401	57.6003	70.2198	-0.981077	0	0.0646772	51.7201	-1.0357	0.151268	0.338747	0	0	0	0	NA
1027	CDKN1B	CDKN1B	cyclin dependent kinase inhibitor 1B	HGNC:1785	12p13.1-p12	hDG04K22	human	NM_004064	153.401	87.4341	105.157	1.4103	1.22473	1.4691	115.331	0.740448	0.304909	0.430581	0	0	0	0	0.00653595
1028	CDKN1C	CDKN1C	cyclin dependent kinase inhibitor 1C	HGNC:1786	11p15.5	hDG04I09	human	NM_000076	123.232	61.0593	92.5154	0.838004	0.141998	0.960918	92.269	0.0965159	0.893613	0.638998	0	0	0	0	NA
1029	CDKN2A	CDKN2A	cyclin dependent kinase inhibitor 2A	HGNC:1787	9p21	DDRO09	human	NM_000077 NM_001195132 NM_058195 NM_058197	76.1269	55.5072	85.9334	-0.715369	-0.975535	-0.487374	72.5225	-0.45485	0.528526	0.530626	0	0	0	0	0.196078
1029	CDKN2A	CDKN2A	cyclin dependent kinase inhibitor 2A	HGNC:1787	9p21	hDG30K15	human	NM_058195	71.1325	74.729	68.2838	-0.29509	-0.58522	-0.812848	71.3818	-0.486701	0.50006	0.518454	0	0	0	0	0.196078
1030	CDKN2B	CDKN2B	cyclin dependent kinase inhibitor 2B	HGNC:1788	9p21	hDG04D21	human	NM_004936	81.2121	53.4928	93.8946	0.0408782	-0.168623	1.01636	76.1998	-0.352171	0.625563	0.566616	0	0	0	0	NA
1031	CDKN2C	CDKN2C	cyclin dependent kinase inhibitor 2C	HGNC:1789	1p32.3	hDG04H07	human	NM_001262	63.9731	58.8974	27.2375	-0.286148	0.0532493	-1.66313	50.036	-1.08272	0.133557	0.32496	0	0	0	0	NA
1032	CDKN2D	CDKN2D	cyclin dependent kinase inhibitor 2D	HGNC:1790	19p13	hDG04J07	human	NM_079421	192.189	87.2179	77.8049	2.14611	1.21586	0.369584	119.07	0.84487	0.241773	0.389994	0	0	0	0	NA
1033	CDKN3	CDKN3	cyclin dependent kinase inhibitor 3	HGNC:1791	14q22	hDG27C13	human	NM_005192	113.468	217.761	289.828	0.951205	1.76558	2.90123	207.019	3.30058	4.84324e-06	0.00118214	1	1	1	1	0.00326797
50937	CDON	CDON	cell adhesion associated, oncogene regulated	HGNC:17104	11q24.2	hDG02K22	human	NM_016952	55.8393	65.9961	41.7814	-0.0887488	0.353941	-0.503424	54.5389	-0.95699	0.184832	0.360002	0	0	0	0	0.0163399
9085	CDY1	CDY1	chromodomain Y-linked 1	HGNC:1809	Yq11.22	hDG22A15	human	NM_004680	183.958	84.2302	73.5358	3.00148	-0.883262	-0.76324	113.908	0.700719	0.331619	0.444536	0	0	0	0	NA
9085	CDY1	CDY1	chromodomain Y-linked 1	HGNC:1809	Yq11.22	hDG22O13	human	NM_170723	103.014	84.2302	103.311	0.143329	-0.883262	0.683366	96.8519	0.224478	0.755764	0.607142	0	0	0	0	NA
253175	CDY1B	CDY1B	chromodomain Y-linked 1B	HGNC:23920	Yq11.223	hDG22H03	human	NM_001003895	109.223	103.363	104.224	0.362539	-0.626313	0.72774	105.603	0.468838	0.515922	0.526079	0	0	0	0	NA
9426	CDY2A	CDY2A	chromodomain Y-linked 2A	HGNC:1810	Yq11.222	hDG22C15	human	NM_004825	110.416	129.671	119.203	0.404694	-0.273008	1.45548	119.764	0.864222	0.231116	0.384099	0	0	0	0	NA
203611	CDY2B	CDY2B	chromodomain Y-linked 2B	HGNC:23921	Yq11.222	hDG22E15	human	NM_001001722	65.5275	262.407	76.6412	-1.18036	1.50957	-0.612367	134.858	1.2857	0.0749201	0.261236	0	0	0	0	NA
634	CEACAM1	CEACAM1	carcinoembryonic antigen related cell adhesion molecule 1	HGNC:1814	19q13.2	hDG02M22	human	NM_001712	21.8651	130.024	68.1287	-1.40223	2.79813	0.571851	73.3393	-0.432043	0.549428	0.539886	0	0	0	0	0.00326797
56971	CEACAM19	CEACAM19	carcinoembryonic antigen related cell adhesion molecule 19	HGNC:31951	19q13.31	hDG02O22	human	NM_020219	120.115	128.625	142.62	2.39622	2.74471	3.61195	130.453	1.1627	0.107171	0.299141	0	0	0	0	0.00326797
125931	CEACAM20	CEACAM20	carcinoembryonic antigen related cell adhesion molecule 20	HGNC:24879	19q13.31	hDG02D03	human	NM_198444	53.5438	59.6982	48.488	-0.177498	0.113528	-0.229718	53.91	-0.974551	0.176901	0.354099	0	0	0	0	NA
90273	CEACAM21	CEACAM21	carcinoembryonic antigen related cell adhesion molecule 21	HGNC:28834	19q13.2	hDG02F03	human	NM_033543	49.8709	61.7975	21.6617	-0.319496	0.193666	-1.32454	44.4434	-1.23888	0.0860557	0.276874	0	0	0	0	0.00326797
1084	CEACAM3	CEACAM3	carcinoembryonic antigen related cell adhesion molecule 3	HGNC:1815	19q13.2	hDG02H03	human	NM_001815	38.8522	28.5589	43.6976	-0.74549	-1.07518	-0.425222	37.0363	-1.4457	0.0451618	0.217027	-1	0	-1	0	0.0130719
1089	CEACAM4	CEACAM4	carcinoembryonic antigen related cell adhesion molecule 4	HGNC:1816	19q13.2	hDG03G16	human	NM_001817	61.9976	42.8661	15.2627	0.343491	-0.706918	-1.66077	40.0421	-1.36177	0.0591819	0.237421	0	0	0	0	NA
1048	CEACAM5	CEACAM5	carcinoembryonic antigen related cell adhesion molecule 5	HGNC:1817	19q13.1-q13.2	hDG03I16	human	NM_004363	28.032	53.8678	49.278	-1.18036	-0.136195	-0.311793	43.7259	-1.25891	0.0810989	0.27038	0	0	0	0	0.00653595
1087	CEACAM7	CEACAM7	carcinoembryonic antigen related cell adhesion molecule 7	HGNC:1819	19q13.2	hDG02J03	human	NM_006890	18.1923	18.7623	40.8234	-1.54423	-1.44915	-0.542525	25.926	-1.75593	0.0149775	0.141781	-1	0	-1	0	0.00980392
1088	CEACAM8	CEACAM8	carcinoembryonic antigen related cell adhesion molecule 8	HGNC:1820	19q13.2	hDG03I21	human	NM_001816	67.5657	41.3658	52.8079	0.593302	-0.784744	-0.171804	53.9131	-0.974464	0.176941	0.354099	0	0	0	0	0.00326797
51816	CECR1	CECR1	cat eye syndrome chromosome region, candidate 1	HGNC:1839	22q11.2	hDG09B20	human	NM_017424	112.15	100.553	78.6004	1.43696	1.43978	0.454713	97.1011	0.231438	0.748445	0.605008	0	0	0	0	0.00980392
1056	CEL	CEL	carboxyl ester lipase	HGNC:1848	9q34.3	hDG11M05	human	NM_001807	59.3465	67.1826	54.4959	-0.140828	0.584559	-0.316929	60.3417	-0.794965	0.270667	0.407806	0	0	0	0	0.00326797
1990	ELA1	CELA1	chymotrypsin like elastase family member 1	HGNC:3308	12q13	hDG29C07	human	NM_001971	173.147	219.527	138.447	1.8408	1.80626	0.483597	177.04	2.46352	0.00064259	0.0279755	1	0	1	0	NA
63036	ELA2A	CELA2A	chymotrypsin like elastase family member 2A	HGNC:24609	1p36.21	hDG28N10	human	NM_033440	71.2878	94.5066	64.9095	-0.156858	-0.303521	-0.283996	76.9013	-0.332585	0.644911	0.573128	0	0	0	0	0.00653595
63036	ELA2B	CELA2A	chymotrypsin like elastase family member 2A	HGNC:24609	1p36.21	hDG28H10	human	NM_033440	71.8508	106.952	51.7039	-0.141172	-0.0337245	-0.72419	76.8355	-0.33442	0.643091	0.572576	0	0	0	0	0.00653595
10136	ELA3A	CELA3A	chymotrypsin like elastase family member 3A	HGNC:15944	1p36.12	hDG28C05	human	NM_005747	112.386	156.733	93.4505	0.988207	1.04546	0.667391	120.856	0.894737	0.215071	0.377167	0	0	0	0	NA
23436	ELA3B	CELA3B	chymotrypsin like elastase family member 3B	HGNC:15945	1p36.12	hDG28K12	human	NM_007352	54.3983	99.1736	67.4654	-0.627433	-0.202347	-0.198797	73.6791	-0.422556	0.558208	0.542706	0	0	0	0	0.00326797
10658	CUGBP1	CELF1	CUGBP, Elav-like family member 1	HGNC:2549	11p11.2	hDG23C04	human	NM_006560	66.567	91.8616	131.427	-1.38986	-0.700941	0.514934	96.6184	0.21796	0.762646	0.608452	0	0	0	0	0.00980392
9620	CELSR1	CELSR1	cadherin EGF LAG seven-pass G-type receptor 1	HGNC:1850	22q13.31	hDG05A21	human	NM_014246	217.824	133.345	46.3361	3.88635	1.16207	-0.770847	132.502	1.2199	0.0910267	0.281524	0	0	0	0	0.0294118
1952	CELSR2	CELSR2	cadherin EGF LAG seven-pass G-type receptor 2	HGNC:3231	1p13.3	hDG05C21	human	NM_001408	117.349	81.3352	102.937	0.706609	-0.349435	1.0278	100.54	0.327471	0.650004	0.57492	0	0	0	0	0.0490196
1951	CELSR3	CELSR3	cadherin EGF LAG seven-pass G-type receptor 3	HGNC:3230	3p21.31	hDG05E21	human	NM_001407	136.124	112.094	69.5831	1.3008	0.544468	-0.0321186	105.934	0.478063	0.50771	0.522415	0	0	0	0	0.0326797
1058	CENPA	CENPA	centromere protein A	HGNC:1851	2p23.3	hDG23A21	human	NM_001809	81.4556	98.3723	63.3415	-1.00833	-0.542238	-1.2547	81.0565	-0.216563	0.764117	0.608452	0	0	0	0	0.00326797
1059	CENPB	CENPB	centromere protein B	HGNC:1852	20p13	hDG23P22	human	NM_001810	42.107	193.32	116.359	-2.01666	1.77219	0.123294	117.262	0.794368	0.271092	0.408181	0	0	0	0	0.00326797
1060	CENPC1	CENPC	centromere protein C	HGNC:1854	4q13.2	hDG23C21	human	NM_001812	136.225	128.213	77.8514	0.395156	0.185154	-0.877563	114.096	0.705982	0.32797	0.442484	0	0	0	0	NA
1062	CENPE	CENPE	centromere protein E	HGNC:1856	4q24-q25	hDG02I05	human	NM_001813	18.1923	25.41	13.518	-1.54423	-1.19538	-1.6569	19.0401	-1.94819	0.00694885	0.101614	-1	-1	-1	0	0.0294118
1062	CENPE	CENPE	centromere protein E	HGNC:1856	4q24-q25	DDRJ11	human	NM_001813	104.364	66.1324	107.836	-0.211204	-0.754515	0.0174062	92.7775	0.110714	0.878076	0.635175	0	0	0	0	0.0294118
64781	CERK	CERK	ceramide kinase	HGNC:19256	22q13.31	K02E14	human	NM_022766	79.4075	151.133	46.077	0.337245	1.43329	-0.740834	92.2059	0.0947531	0.895549	0.639788	0	0	0	0	0.00653595
375298	CERKL	CERKL	ceramide kinase like	HGNC:21699	2q31.3	K02O16	human	NM_201548	35.4769	25.3541	27.0566	-1.08668	-1.68623	-1.2937	29.2959	-1.66183	0.0213028	0.162487	-1	0	-1	0	0.0163399
1066	CES1	CES1	carboxylesterase 1	HGNC:1863	16q22.2	hDG11O05	human	NM_001266	72.6299	63.9725	52.1179	0.318715	0.458654	-0.414446	62.9068	-0.723342	0.316205	0.436079	0	0	0	0	0.00980392
51716	CES4	CES1P1	carboxylesterase 1 pseudogene 1	HGNC:18546	16q12.2	hDG11C07	human	NM_016280	58.0611	48.3806	64.4043	-0.1853	-0.152885	0.0893903	56.9486	-0.889706	0.217651	0.378266	0	0	0	0	NA
8824	CES2	CES2	carboxylesterase 2	HGNC:1864	16q22.1	hDG11A07	human	NM_003869	152.758	104.786	116.72	3.0908	2.05945	2.23476	124.755	1.0036	0.164351	0.346129	0	0	0	0	0.0228758
79984	FLJ21736	CES3	carboxylesterase 3	HGNC:1865	16q22.1	hDG11J11	human	NM_024922	58.0611	15.3626	63.2153	-0.1853	-1.44791	0.040632	45.5463	-1.20808	0.0941498	0.28595	0	0	0	0	NA
283848	FLJ37464	CES4A	carboxylesterase 4A	HGNC:26741	16q22.1	hDG11K16	human	NM_173815	36.6363	31.8716	25.9599	-0.926498	-0.800396	-1.48713	31.4893	-1.60059	0.0265735	0.178861	-1	0	-1	0	NA
221223	CES7	CES5A	carboxylesterase 5A	HGNC:26459	16q13	hDG11E07	human	NM_145024	33.6369	29.1201	45.7766	-1.03027	-0.908314	-0.674491	36.1778	-1.46967	0.0417151	0.210905	-1	0	-1	0	0.00653595
1068	CETN1	CETN1	centrin 1	HGNC:1866	18p11.32	hDG04G03	human	NM_004066	84.4444	25.6046	43.557	0.102196	-1.31348	-1.00712	51.202	-1.05016	0.145643	0.335715	0	0	0	0	0.00980392
1069	CETN2	CETN2	centrin 2	HGNC:1867	Xq28	hDG04J21	human	NM_004344	120	75.3277	69.0705	0.776686	0.72774	0.0184792	88.1327	-0.0189785	0.97902	0.659499	0	0	0	0	NA
1069	CETN2	CETN2	centrin 2	HGNC:1867	Xq28	DDRK05	human	NM_004344	120.773	144.539	53.08	0.0817565	0.876457	-1.24454	106.13	0.483556	0.502856	0.520104	0	0	0	0	NA
1070	CETN3	CETN3	centrin 3	HGNC:1868	5q14.3	hDG04L21	human	NM_004365	62.8956	48.9528	56.8884	-0.306587	-0.354995	-0.47122	56.2456	-0.909336	0.20767	0.373154	0	0	0	0	0.00326797
1071	CETP	CETP	cholesteryl ester transfer protein	HGNC:1869	16q13	hDG30G05	human	NM_000078	81.9936	67.2476	84.6983	-0.0948503	-0.803438	-0.302656	77.9798	-0.302469	0.675131	0.583153	0	0	0	0	0.00653595
54777	C10ORF92	CFAP46	cilia and flagella associated protein 46	HGNC:25247	10q26.3	DDRI20	human	XM_003118625 XM_003119478 XM_003120662	66.9688	66.4987	84.0453	-0.878882	-0.746894	-0.53089	72.5043	-0.455359	0.528063	0.530626	0	0	0	0	NA
629	CFB	CFB	complement factor B	HGNC:1037	6p21.33	hDG29M03	human	NM_001710	93.3379	66.1121	71.9635	-0.210778	-0.697355	-0.674491	77.1378	-0.32598	0.651491	0.57494	0	0	0	0	0.00326797
1675	CFD	CFD	complement factor D	HGNC:2771	19p13.3	hDG28I03	human	NM_001928	67.9099	134.176	85.7827	-0.250973	0.556455	0.411794	95.9562	0.19947	0.78225	0.611605	0	0	0	0	NA
3426	CFI	CFI	complement factor I	HGNC:5394	4q25	hDG11G07	human	NM_000204	57.6326	33.2473	51.7216	-0.200124	-0.746436	-0.430699	47.5338	-1.15259	0.110259	0.30275	0	0	0	0	0.0163399
8837	CFLAR	CFLAR	CASP8 and FADD like apoptosis regulator	HGNC:1876	2q33-q34	hDG28C04	human	NM_003879	74.6657	93.7287	103.674	-0.0627433	-0.320383	1.00819	90.6895	0.0524128	0.942104	0.648638	0	0	0	0	0.00653595
1080	CFTR	CFTR	cystic fibrosis transmembrane conductance regulator	HGNC:1884	7q31.2	hDG12I18	human	NM_000492	87.8991	69.5988	38.8468	0.395059	-0.674491	-1.13023	65.4482	-0.652379	0.366022	0.460458	0	0	0	0	0.0228758
57530	CGN	CGN	cingulin	HGNC:17429	1q21	hDG18K15	human	NM_020770	34.7995	70.3592	49.1544	-1.13875	1.23511	0	51.4377	-1.04358	0.148178	0.336948	0	0	0	0	0.00980392
10669	CGREF1	CGREF1	cell growth regulator with EF-hand domain 1	HGNC:16962	2p23.3	hDG04E22	human	NM_006569	14.4108	38.3597	32.0644	-1.22635	-0.789864	-1.4691	28.2783	-1.69024	0.0191843	0.15581	-1	0	-1	0	NA
10668	CGRRF1	CGRRF1	cell growth regulator with ring finger domain 1	HGNC:15528	14q22.2	hDG20D05	human	NM_006568	79.037	82.7004	56.6088	-0.590179	-0.413892	-0.392614	72.7821	-0.447602	0.535116	0.532437	0	0	0	0	NA
10036	CHAF1A	CHAF1A	chromatin assembly factor 1 subunit A	HGNC:1910	19p13.3	DDRL18	human	NM_005483	67.7319	160.293	85.1782	-0.865256	1.20418	-0.50478	104.401	0.435269	0.546446	0.538041	0	0	0	0	0.00980392
8208	CHAF1B	CHAF1B	chromatin assembly factor 1 subunit B	HGNC:1911	21q22.2	DDRE18	human	NM_005441	183.735	86.2835	92.7307	1.20591	-0.33534	-0.330718	120.916	0.896411	0.214235	0.37662	0	0	0	0	0.00980392
8208	CHAF1B	CHAF1B	chromatin assembly factor 1 subunit B	HGNC:1911	21q22.2	hDG23E21	human	NM_005441	137.288	117.904	105.197	0.422408	-0.0661265	-0.16681	120.13	0.874451	0.225644	0.381492	0	0	0	0	0.00980392
1103	CHAT	CHAT	choline O-acetyltransferase	HGNC:1912	10q11.2	hDG31C09	human	NM_020984	139.647	118.507	160.262	0.849752	0.27167	1.40015	139.472	1.41453	0.0500034	0.226118	0	0	0	0	0.0163399
1105	CHD1	CHD1	chromodomain helicase DNA binding protein 1	HGNC:1915	5q15-q21	hDG23G21	human	NM_001270	177.168	153.171	69.4803	1.44436	0.793519	-1.09514	133.273	1.24144	0.0854302	0.275703	0	0	0	0	0.00980392
1106	CHD2	CHD2	chromodomain helicase DNA binding protein 2	HGNC:1917	15q26	hDG23I21	human	NM_001271	148.986	124.415	87.3387	0.722182	0.0925772	-0.630975	120.247	0.877713	0.223925	0.380734	0	0	0	0	0.0294118
1107	CHD3	CHD3	chromodomain helicase DNA binding protein 3	HGNC:1918	17p13	hDG19F09	human	NM_001005271	170.035	46.9218	123.547	2.05598	-1.14081	0.612367	113.502	0.689374	0.339509	0.447146	0	0	0	0	0.0261438
1108	CHD4	CHD4	chromodomain helicase DNA binding protein 4	HGNC:1919	12p13	hDG19I17	human	NM_001273	102.518	46.9218	53.6479	0.121896	-1.14081	-1.16261	67.6958	-0.589622	0.413936	0.483172	0	0	0	0	0.0196078
26038	CHD5	CHD5	chromodomain helicase DNA binding protein 5	HGNC:16816	1p36.3	hDG18I08	human	NM_015557	53.0741	16.7027	42.6838	-0.315346	-1.48038	-0.322583	37.4869	-1.43312	0.0470669	0.219726	-1	0	-1	0	0.00980392
1111	CHEK1	CHEK1	checkpoint kinase 1	HGNC:1925	11q24.2	K01M12	human	NM_001274	34.5205	50.8213	12.573	-2.03297	-1.27404	-2.43566	32.6383	-1.5685	0.0297606	0.18476	-1	0	-1	-1	0.00326797
1111	CHEK1	CHEK1	checkpoint kinase 1	HGNC:1925	11q24.2	DDRH12	human	NM_001114121 NM_001114122 NM_001274	46.363	30.5931	65.5417	-1.24679	-1.49379	-0.957342	47.4992	-1.15355	0.109962	0.302642	0	0	0	0	0.00326797
11200	CHEK2	CHEK2	checkpoint kinase 2	HGNC:16627	22q12.1	DDRE20	human	NM_001005735 NM_007194 NM_145862	134.51	173.483	185.627	0.327026	1.47854	1.81025	164.54	2.11447	0.00339424	0.0696285	1	0	1	0	0.0261438
11200	CHEK2	CHEK2	checkpoint kinase 2	HGNC:16627	22q12.1	K01E08	human	NM_001005735	167.109	95.2657	104.183	1.34898	-0.0428248	-0.140519	122.186	0.931861	0.196647	0.365883	0	0	0	0	0.0261438
55743	CHFR	CHFR	checkpoint with forkhead and ring finger domains, E3 ubiquitin protein ligase	HGNC:20455	12q24.33	hDG18C07	human	NM_018223	60.0729	25.357	26.2132	0	-1.04239	-1.1437	37.2144	-1.44073	0.0459081	0.217912	-1	0	-1	0	0.00653595
1119	CHKA	CHKA	choline kinase alpha	HGNC:1937	11q13.1	K03A05	human	NM_001277	77.5063	125.539	118.633	-0.296118	0.41056	0.485304	107.226	0.514149	0.476207	0.509407	0	0	0	0	NA
1120	CHKB	CHKB	choline kinase beta	HGNC:1938	22q13.33	K02M18	human	NM_152253	115.246	104.674	22.4917	1.49887	0.281038	-1.42638	80.8039	-0.223617	0.756686	0.607233	0	0	0	0	NA
10752	CHL1	CHL1	cell adhesion molecule L1 like	HGNC:1939	3p26	hDG02L03	human	NM_006614	36.5567	31.0081	34.8353	-0.834239	-0.981685	-0.786906	34.1334	-1.52676	0.0343922	0.19761	-1	0	-1	0	0.0163399
1121	CHM	CHM	CHM, Rab escort protein 1	HGNC:1940	Xq21.1-q21.3	hDG04C21	human	NM_000390	122.155	80.9485	112.742	0.817565	0.958487	1.774	105.282	0.459865	0.523993	0.529477	0	0	0	0	0.00980392
1124	CHN2	CHN2	chimerin 2	HGNC:1944	7p15.3	hDG04G07	human	NM_004067	135.084	51.3309	48.6137	1.06283	-0.257371	-0.803845	78.3429	-0.292331	0.685444	0.58528	0	0	0	0	0.00980392
11261	CHP	CHP1	calcineurin like EF-hand protein 1	HGNC:17433	15q13.3	hDG27E08	human	NM_007236	49.8445	161.829	231.463	-1.15009	0.7836	1.94032	147.712	1.64461	0.0227113	0.166127	1	0	1	0	0.00326797
56994	CHPT1	CHPT1	choline phosphotransferase 1	HGNC:17852	12q23.2	hDG31E09	human	NM_020244	129.692	111.805	104.879	0.658558	0.168623	0.218628	115.459	0.744022	0.302569	0.428451	0	0	0	0	0.00326797
89832	CHRFAM7A	CHRFAM7A	CHRNA7 (exons 5-10) and FAM7A (exons A-E) fusion	HGNC:15781	15q13.2	hDG06E13	human	NM_139320	64.8106	44.5877	26.0691	0.0790612	-0.331114	-0.620531	45.1558	-1.21899	0.0912154	0.281524	0	0	0	0	0.00326797
1128	CHRM1	CHRM1	cholinergic receptor muscarinic 1	HGNC:1950	11q12.3	hDG08A13	human	NM_000738	74.02	105.719	131.741	-0.631891	0.274243	1.57097	103.826	0.419225	0.561317	0.543353	0	0	0	0	NA
1129	CHRM2	CHRM2	cholinergic receptor muscarinic 2	HGNC:1951	7q35-q36	hDG08C13	human	NM_001006627	64.5913	89.7188	29.0018	-0.958487	-0.200124	-2.03201	61.104	-0.77368	0.283714	0.416217	0	0	0	0	0.00980392
1131	CHRM3	CHRM3	cholinergic receptor muscarinic 3	HGNC:1952	1q43	hDG08E13	human	NM_000740	68.6908	128.219	67.955	-0.816489	0.941322	-0.665953	88.2882	-0.0146387	0.983817	0.66123	0	0	0	0	0.0163399
1132	CHRM4	CHRM4	cholinergic receptor muscarinic 4	HGNC:1953	11p12-p11.2	hDG08J21	human	NM_000741	93.2872	57.7188	41.6616	0.0354995	-1.14886	-1.58804	64.2225	-0.686603	0.341418	0.447649	0	0	0	0	NA
1133	CHRM5	CHRM5	cholinergic receptor muscarinic 5	HGNC:1954	15q26	hDG08L21	human	NM_012125	50.6533	63.2188	104.96	-1.44128	-0.985794	0.631801	72.9442	-0.443076	0.539258	0.534823	0	0	0	0	0.00326797
1134	CHRNA1	CHRNA1	cholinergic receptor nicotinic alpha 1 subunit	HGNC:1955	2q31.1	hDG06G13	human	NM_000079	24.9359	17.3845	22.7885	-0.785671	-0.91976	-0.71496	21.703	-1.87384	0.00942382	0.11311	-1	0	-1	0	NA
57053	CHRNA10	CHRNA10	cholinergic receptor nicotinic alpha 10 subunit	HGNC:13800	11p15.5	hDG06I13	human	NM_020402	13.5432	24.1853	52.7827	-1.03274	-0.772599	0.148388	30.1704	-1.63741	0.0232851	0.168727	-1	0	-1	0	0.00326797
1135	CHRNA2	CHRNA2	cholinergic receptor nicotinic alpha 2 subunit	HGNC:1956	8p21	hDG06K13	human	NM_000742	34.0501	48.4415	48.5647	-0.588018	-0.247722	0.0269796	43.6854	-1.26004	0.0808255	0.270051	0	0	0	0	NA
1136	CHRNA3	CHRNA3	cholinergic receptor nicotinic alpha 3 subunit	HGNC:1957	15q24	hDG06O13	human	NM_000743	67.7727	69.9773	41.0662	0.143298	0.21829	-0.188857	59.6054	-0.815523	0.258473	0.399998	0	0	0	0	0.00326797
1137	CHRNA4	CHRNA4	cholinergic receptor nicotinic alpha 4 subunit	HGNC:1958	20q13.33	hDG07K15	human	NM_000744	94.7027	76.3773	74.0914	0.198016	0.382547	0.0467469	81.7238	-0.19793	0.783884	0.612208	0	0	0	0	0.00653595
1138	CHRNA5	CHRNA5	cholinergic receptor nicotinic alpha 5 subunit	HGNC:1959	15q24	hDG07M15	human	NM_000745	100.873	55.7985	70.7151	0.433159	-0.825496	-0.0734594	75.7955	-0.363462	0.614525	0.562546	0	0	0	0	0.00653595
8973	CHRNA6	CHRNA6	cholinergic receptor nicotinic alpha 6 subunit	HGNC:15963	8p22	hDG06A15	human	NM_004198	126.787	126.877	119.801	1.4231	1.44954	2.07743	124.488	0.996152	0.167498	0.347646	0	0	0	0	0.0130719
1139	CHRNA7	CHRNA7	cholinergic receptor nicotinic alpha 7 subunit	HGNC:1960	15q13.3	hDG06C15	human	NM_000746	105.597	34.8399	48.0961	0.963558	-0.542045	0.0134898	62.8442	-0.725088	0.315053	0.435491	0	0	0	0	0.00326797
55584	CHRNA9	CHRNA9	cholinergic receptor nicotinic alpha 9 subunit	HGNC:14079	4p14	hDG06E15	human	NM_017581	26.303	15.571	72.935	-0.756023	-0.959003	0.72845	38.2697	-1.41126	0.0505372	0.226632	0	0	0	0	NA
1140	CHRNB1	CHRNB1	cholinergic receptor nicotinic beta 1 subunit	HGNC:1961	17p13.1	hDG06G15	human	NM_000747	9.44175	17.6112	71.0603	-1.12168	-0.914855	0.674491	32.7044	-1.56666	0.0299567	0.184987	-1	0	-1	0	NA
1141	CHRNB2	CHRNB2	cholinergic receptor nicotinic beta 2 subunit	HGNC:1962	1q21.3	hDG06I15	human	NM_000748	13.9989	27.1323	21.8512	-1.02285	-0.708828	-0.74194	20.9941	-1.89363	0.008698	0.111738	-1	-1	-1	0	0.00326797
1142	CHRNB3	CHRNB3	cholinergic receptor nicotinic beta 3 subunit	HGNC:1963	8p11.21	hDG06K15	human	NM_000749	146.611	152.267	49.0334	1.853	1.99895	0.0404694	115.97	0.758307	0.293418	0.422589	0	0	0	0	0.00653595
1143	CHRNB4	CHRNB4	cholinergic receptor nicotinic beta 4 subunit	HGNC:1964	15q24	hDG07O15	human	NM_000750	73.2697	51.3398	29.8242	-0.618799	-1.08724	-1.52929	51.4779	-1.04246	0.148616	0.337069	0	0	0	0	0.00326797
1144	CHRND	CHRND	cholinergic receptor nicotinic delta subunit	HGNC:1965	2q37.1	hDG07A17	human	NM_000751	128.476	108.96	95.4748	1.48512	2.29528	0.808053	110.97	0.618696	0.391288	0.471773	0	0	0	0	0.0130719
1145	CHRNE	CHRNE	cholinergic receptor nicotinic epsilon subunit	HGNC:1966	17p13.2	hDG06M15	human	NM_000080	39.7465	30.0793	8.72876	-0.464484	-0.645058	-1.11965	26.1849	-1.7487	0.015397	0.142523	-1	0	-1	0	NA
1146	CHRNG	CHRNG	cholinergic receptor nicotinic gamma subunit	HGNC:1967	2q37.1	hDG06O15	human	NM_005199	39.5187	115.996	123.081	-0.469426	1.21408	2.17186	92.8654	0.113167	0.875401	0.63509	0	0	0	0	0.0130719
113189	D4ST1	CHST14	carbohydrate sulfotransferase 14	HGNC:24464	15q15.1	hDG31M11	human	NM_130468	127.48	195.887	127.555	0.61607	1.4614	0.702401	150.308	1.71708	0.0173586	0.151146	1	0	1	0	0.00326797
51363	GALNAC4S-6ST	CHST15	carbohydrate sulfotransferase 15	HGNC:18137	10q26	hDG31K17	human	NM_015892	34.5662	79.5126	50.3679	-1.16841	-0.327877	-0.944287	54.8156	-0.949266	0.188406	0.361491	0	0	0	0	0.00653595
56548	CHST7	CHST7	carbohydrate sulfotransferase 7	HGNC:13817	Xp11.3	hDG31G09	human	NM_019886	59.4539	52.0944	71.7362	-0.690424	-0.749434	-0.488424	61.0948	-0.773935	0.283545	0.416217	0	0	0	0	NA
1147	CHUK	CHUK	conserved helix-loop-helix ubiquitous kinase	HGNC:1974	10q24-q25	K02F06	human	NM_001278	126.806	135.269	68.9016	1.87359	1.03984	-0.0774006	110.326	0.600697	0.405226	0.477451	0	0	0	0	0.00980392
10518	CIB2	CIB2	calcium and integrin binding family member 2	HGNC:24579	15q24	hDG27M06	human	NM_006383	65.0303	106.462	155.7	-0.648549	-0.188461	0.69297	109.064	0.565467	0.433335	0.492551	0	0	0	0	NA
117286	CIB3	CIB3	calcium and integrin binding family member 3	HGNC:24580	19p13.12	hDG27K12	human	NM_054113	78.3832	31.8856	33.3567	-0.207536	-1.49777	-1.32126	47.8752	-1.14306	0.113238	0.304962	0	0	0	0	NA
8483	CILP	CILP	cartilage intermediate layer protein	HGNC:1980	15q22	hDG27I20	human	NM_003613	79.9542	4.20198	56.3662	-0.155652	-1.9838	-0.942439	46.8408	-1.17194	0.10442	0.296038	0	0	0	0	0.0294118
1154	CISH	CISH	cytokine inducible SH2 containing protein	HGNC:1984	3p21.3	hDG01G20	human	NM_013324	47.1414	88.9105	68.9711	-1.1138	1.02488	0.54043	68.341	-0.571606	0.428341	0.491087	0	0	0	0	0.00326797
11113	CIT	CIT	citron rho-interacting serine/threonine kinase	HGNC:1985	12q24.23	K02I13	human	NM_007174	121.026	156.799	77.2706	1.68623	1.57381	0.165858	118.365	0.825176	0.252895	0.397293	0	0	0	0	0.0196078
9793	CKAP5	CKAP5	cytoskeleton associated protein 5	HGNC:28959	11p11.2	hDG02K05	human	NM_001008938	5.79627	18.7623	10.8832	-2.02347	-1.44915	-1.76443	11.8139	-2.14996	0.00289392	0.0622659	-1	-1	-1	-1	0.0163399
1152	CKB	CKB	creatine kinase B	HGNC:1991	14q32.32	K01O16	human	NM_001823	44.5764	52.7536	114.653	-1.77648	-1.22051	0.121783	70.661	-0.506828	0.482518	0.51288	0	0	0	0	0.00980392
1158	CKM	CKM	creatine kinase, M-type	HGNC:1994	19q13.32	K01A18	human	NM_001824	61.3361	109.179	85.4873	-1.34898	0.342598	-0.608915	85.334	-0.0971239	0.892945	0.638998	0	0	0	0	0.00653595
1159	CKMT1B	CKMT1B	creatine kinase, mitochondrial 1B	HGNC:1995	15q15	K03K05	human	NM_020990	29.386	56.5364	59.5369	-1.08577	-0.84067	-0.616912	48.4864	-1.12599	0.118719	0.308574	0	0	0	0	0.00326797
1160	CKMT2	CKMT2	creatine kinase, mitochondrial 2	HGNC:1996	5q14.1	K03I13	human	NM_001825	134.649	155.728	74.5314	0.641589	0.957972	-0.337245	121.636	0.916508	0.204126	0.371487	0	0	0	0	NA
23332	CLASP1	CLASP1	cytoplasmic linker associated protein 1	HGNC:17088	2q14.2-q14.3	hDG01I13	human	NM_015282	70.6683	48.8284	46.3632	0.0754365	-1.00736	-0.708006	55.2866	-0.936113	0.194598	0.365638	0	0	0	0	0.00980392
23122	CLASP2	CLASP2	cytoplasmic linker associated protein 2	HGNC:17078	3p24.3	hDG01K13	human	NM_015097	45.9124	44.1637	58.3499	-1.17592	-1.24387	-0.0460832	49.4754	-1.09838	0.128028	0.320034	0	0	0	0	NA
1178	CLC	CLC	Charcot-Leyden crystal galectin	HGNC:2014	19q13.1	hDG10O03	human	NM_001828	34.588	144.073	67.403	-0.993341	2.048	-0.164065	82.0213	-0.189624	0.792756	0.61366	0	0	0	0	0.00653595
1179	CLCA1	CLCA1	chloride channel accessory 1	HGNC:2015	1p22.3	hDG12K18	human	NM_001285	137.722	104.167	126.389	1.91748	0.0337245	1.2396	122.759	0.947864	0.189056	0.362146	0	0	0	0	0.0130719
9635	CLCA2	CLCA2	chloride channel accessory 2	HGNC:2016	1p22.3	hDG13F07	human	NM_006536	37.9608	46.3852	37.9783	-1.03872	-0.956074	-1.37198	40.7748	-1.34131	0.0630952	0.242625	0	0	0	0	0.00653595
9629	CLCA3	CLCA3P	chloride channel accessory 3, pseudogene	HGNC:2017	1p22.3	hDG13H07	human	NM_004921	37.2142	70.4512	81.4116	-1.0657	-0.144066	0.237605	63.0257	-0.720022	0.318436	0.437901	0	0	0	0	NA
22802	CLCA4	CLCA4	chloride channel accessory 4	HGNC:2018	1p22.3	hDG12M18	human	NM_012128	43.7525	72.0679	97.4327	-0.953923	-0.623904	0.455737	71.0843	-0.495006	0.492781	0.51645	0	0	0	0	0.00653595
1180	CLCN1	CLCN1	chloride voltage-gated channel 1	HGNC:2019	7q34	hDG12O18	human	NM_000083	73.3938	93.4671	123.695	-0.0481779	-0.185485	1.16669	96.852	0.224484	0.755762	0.607142	0	0	0	0	0.00653595
1181	CLCN2	CLCN2	chloride voltage-gated channel 2	HGNC:2020	3q27.1	hDG12A20	human	NM_004366	104.296	118.158	129.082	0.896109	0.320383	1.31252	117.179	0.792059	0.272423	0.408787	0	0	0	0	0.0163399
1182	CLCN3	CLCN3	chloride voltage-gated channel 3	HGNC:2021	4q33	hDG12C20	human	NM_001829	114.387	132.15	79.2508	1.20445	0.607042	-0.036459	108.596	0.552401	0.444022	0.496545	0	0	0	0	0.00980392
1183	CLCN4	CLCN4	chloride voltage-gated channel 4	HGNC:2022	Xp22.3	hDG12E20	human	NM_001830	17.2645	45.7305	19.9916	-1.76331	-1.1635	-1.64065	27.6622	-1.70745	0.0179932	0.151146	-1	0	-1	0	0.0130719
1184	CLCN5	CLCN5	chloride voltage-gated channel 5	HGNC:2023	Xp11.23	hDG12G20	human	NM_000084	27.9858	81.1214	20.665	-1.4357	-0.438419	-1.62242	43.2574	-1.27199	0.0779962	0.265768	0	0	0	0	0.00653595
1185	CLCN6	CLCN6	chloride voltage-gated channel 6	HGNC:2024	1p36.22	hDG13J07	human	NM_001286	86.8642	60.7472	84.3071	0.72845	-0.471489	0.34491	77.3062	-0.321279	0.656191	0.577035	0	0	0	0	NA
1186	CLCN7	CLCN7	chloride voltage-gated channel 7	HGNC:2025	16p13.3	hDG13L07	human	NM_001287	41.6939	34.3523	21.0186	-0.903818	-1.36208	-2.00048	32.3549	-1.57642	0.0289449	0.184456	-1	0	-1	-1	0.00326797
1187	CLCNKA	CLCNKA	chloride voltage-gated channel Ka	HGNC:2026	1p36.13	hDG12I20	human	NM_004070	37.4458	51.4918	48.2744	-1.14663	-1.04546	-0.875015	45.7373	-1.20275	0.0956065	0.286389	0	0	0	0	0.0196078
1188	CLCNKB	CLCNKB	chloride voltage-gated channel Kb	HGNC:2027	1p36.13	hDG12M20	human	NM_000085	78.4391	90.9979	78.5774	0.105991	-0.236072	-0.0546884	82.6715	-0.171468	0.812195	0.619606	0	0	0	0	0.00980392
9076	CLDN1	CLDN1	claudin 1	HGNC:2032	3q28-q29	hDG03H05	human	NM_021101	42.7875	39.8656	50.8825	-0.518359	-0.86257	-0.248162	44.5119	-1.23697	0.0865386	0.277768	0	0	0	0	NA
9071	CLDN10	CLDN10	claudin 10	HGNC:2033	13q31-q34	hDG03J05	human	NM_182848	45.5716	34.3647	26.8151	-0.393453	-1.14793	-1.20263	35.5838	-1.48626	0.0394626	0.206681	-1	0	-1	0	0.00653595
23562	CLDN14	CLDN14	claudin 14	HGNC:2035	21q22.3	hDG02D20	human	NM_144492	88.8953	57.599	43.6976	1.18923	0.0333906	-0.425222	63.3973	-0.709646	0.32546	0.441972	0	0	0	0	NA
24146	CLDN15	CLDN15	claudin 15	HGNC:2036	7q22	hDG02F20	human	NM_014343	70.99	86.2891	109.087	0.496993	1.1286	2.24341	88.7886	-0.000664529	0.999265	0.664391	0	0	0	0	0.00326797
10686	CLDN16	CLDN16	claudin 16	HGNC:2037	3q28	hDG02H20	human	NM_006580	43.4433	83.4901	34.8353	-0.567992	1.02175	-0.786906	53.9229	-0.974191	0.177067	0.354099	0	0	0	0	0.00326797
26285	CLDN17	CLDN17	claudin 17	HGNC:2038	21q22.1	hDG02J20	human	NM_012131	50.7891	67.7455	32.2006	-0.283996	0.420722	-0.894433	50.2451	-1.07688	0.135663	0.327076	0	0	0	0	NA
51208	CLDN18	CLDN18	claudin 18	HGNC:2039	3q22.3	hDG02N20	human	NM_001002026	45.2798	22.2611	30.524	-0.496993	-1.31559	-0.96286	32.6883	-1.56711	0.0299056	0.184918	-1	0	-1	0	0.00980392
149461	CLDN19	CLDN19	claudin 19	HGNC:2040	1p34.2	hDG03C04	human	NM_148960	61.7192	72.8708	63.7184	0.331	0.849599	0.260888	66.1028	-0.634102	0.379598	0.467584	0	0	0	0	NA
9075	CLDN2	CLDN2	claudin 2	HGNC:2041	Xq22.3-q23	hDG02P20	human	NM_020384	99.9139	100.284	83.2186	1.61523	1.66285	1.18769	94.4723	0.158035	0.826665	0.623573	0	0	0	0	0.00653595
49861	CLDN20	CLDN20	claudin 20	HGNC:2042	6q25	hDG02B22	human	NM_001001346	44.3615	135.272	97.8293	-0.532493	2.99848	1.78398	92.4877	0.102622	0.886929	0.637799	0	0	0	0	NA
137075	CLDN23	CLDN23	claudin 23	HGNC:17591	8p23.1	hDG02D22	human	NM_194284	95.7819	62.4973	95.6737	1.45548	0.220378	1.696	84.6509	-0.116197	0.872087	0.634596	0	0	0	0	0.00326797
1365	CLDN3	CLDN3	claudin 3	HGNC:2045	7q11	hDG02F22	human	NM_001306	61.3486	87.3387	46.3323	0.124248	1.16867	-0.317695	65.0066	-0.664711	0.357029	0.455123	0	0	0	0	NA
1364	CLDN4	CLDN4	claudin 4	HGNC:2046	7q11.23	hDG03L05	human	NM_001305	50.3045	94.3741	50.8825	-0.181113	1.9651	-0.248162	65.187	-0.659672	0.360689	0.457399	0	0	0	0	NA
7122	CLDN5	CLDN5	claudin 5	HGNC:2047	22q11.21	hDG02H22	human	NM_003277	83.3859	47.4524	50.8832	0.976237	-0.353941	-0.131966	60.5739	-0.788481	0.274597	0.410925	0	0	0	0	NA
9074	CLDN6	CLDN6	claudin 6	HGNC:2048	16p13.3	hDG03N05	human	NM_021195	37.2194	59.8687	39.9719	-0.76817	0.175108	-0.680854	45.6867	-1.20416	0.0952181	0.286194	0	0	0	0	0.00326797
1366	CLDN7	CLDN7	claudin 7	HGNC:2049	17p13.1	hDG02J22	human	NM_001307	43.4433	97.4852	51.8413	-0.567992	1.556	-0.0928647	64.2566	-0.685651	0.342089	0.448061	0	0	0	0	0.00326797
9073	CLDN8	CLDN8	claudin 8	HGNC:2050	21q22.1	hDG02L22	human	NM_199328	66.858	68.4452	41.7814	0.337245	0.447434	-0.503424	59.0282	-0.83164	0.249181	0.395156	0	0	0	0	NA
9080	CLDN9	CLDN9	claudin 9	HGNC:2051	16p13.3	hDG02N22	human	NM_020982	18.1923	38.3556	28.6078	-1.54423	-0.701203	-1.04106	28.3852	-1.68726	0.0193977	0.156691	-1	0	-1	0	0.00326797
10462	CLEC10A	CLEC10A	C-type lectin domain family 10 member A	HGNC:16916	17p13.2	hDG05M16	human	NM_182906	86.3939	86.3684	90.3032	-0.273008	-0.20316	0.626313	87.6885	-0.031382	0.965315	0.65467	0	0	0	0	NA
161198	CLEC14A	CLEC14A	C-type lectin domain family 14 member A	HGNC:19832	14q21.1	hDG09A13	human	NM_175060	72.0611	85.7115	107.404	0.00977523	0.830142	1.53087	88.3921	-0.0117371	0.987024	0.662014	0	0	0	0	0.00980392
388512	FLJ45910	CLEC17A	C-type lectin domain family 17 member A	HGNC:34520	19p13.12	hDG05K03	human	NM_207390	107.707	105.942	45.8307	0.401483	0.365688	-0.786906	86.4932	-0.0647575	0.928503	0.64625	0	0	0	0	NA
51266	CLEC1B	CLEC1B	C-type lectin domain family 1 member B	HGNC:24356	12p13.31	hDG06H18	human	NM_016509	4.42894	12.624	31.693	-1.23039	-1.02277	-0.458654	16.2486	-2.02614	0.00499669	0.0851923	-1	-1	-1	0	NA
387836	CLEC2A	CLEC2A	C-type lectin domain family 2 member A	HGNC:24191	12p13.31	hDG05J04	human	NM_207375	111.259	83.5722	63.5186	0.513898	-0.284424	-0.22483	86.1166	-0.075272	0.916932	0.643902	0	0	0	0	NA
9976	CLEC2B	CLEC2B	C-type lectin domain family 2 member B	HGNC:2053	12p13-p12	hDG06J18	human	NM_005127	83.9504	87.6594	55.5946	0.494132	0.60091	0.229327	75.7348	-0.365155	0.612875	0.561817	0	0	0	0	NA
29121	CLEC2D	CLEC2D	C-type lectin domain family 2 member D	HGNC:14351	12p13.31	hDG05E08	human	NM_001004419	92.9908	79.6575	82.7227	-0.0642372	-0.398193	0.385423	85.1236	-0.102999	0.886511	0.637799	0	0	0	0	0.00326797
50856	CLEC4A	CLEC4A	C-type lectin domain family 4 member A	HGNC:13257	12p13	hDG06N20	human	NM_016184	120.635	152.267	56.0633	1.28969	1.99895	0.242817	109.655	0.581973	0.420035	0.485646	0	0	0	0	NA
170482	CLEC4C	CLEC4C	C-type lectin domain family 4 member C	HGNC:13258	12p13.2-p12.3	hDG06P20	human	NM_130441	85.7733	74.0578	95.4306	0.533663	0.306587	1.37596	85.0872	-0.104016	0.885398	0.63773	0	0	0	0	0.00653595
338339	CLEC4D	CLEC4D	C-type lectin domain family 4 member D	HGNC:14554	12p13.31	hDG05O16	human	NM_080387	91.9759	122.719	67.0562	-0.0963558	0.853271	-0.112415	93.9171	0.142535	0.843436	0.625815	0	0	0	0	0.00980392
26253	CLEC4E	CLEC4E	C-type lectin domain family 4 member E	HGNC:14555	12p13.31	hDG07I07	human	NM_014358	99.249	79.1211	87.2216	0.371279	0.543619	0.514216	88.5306	-0.00786984	0.991299	0.662861	0	0	0	0	0.0130719
165530	CLEC4F	CLEC4F	C-type lectin domain family 4 member F	HGNC:25357	2p13.3	hDG05A18	human	NM_173535	91.9759	181.999	127.195	-0.0963558	2.57607	1.79864	133.723	1.25401	0.0823024	0.2716	0	0	0	0	0.0130719
339390	CLEC4G	CLEC4G	C-type lectin domain family 4 member G	HGNC:24591	19p13.2	hDG05C03	human	NM_198492	109.737	99.7903	12.4763	0.46572	0.186907	-1.84682	74.0011	-0.413564	0.566635	0.545319	0	0	0	0	0.00326797
23601	CLEC5A	CLEC5A	C-type lectin domain family 5 member A	HGNC:2054	7q34	hDG05G08	human	NM_013252	101.11	98.1125	82.7227	0.192712	0.138149	0.385423	93.9818	0.144339	0.841478	0.625815	0	0	0	0	NA
93978	CLEC6A	CLEC6A	C-type lectin domain family 6 member A	HGNC:14556	12p13	hDG05E03	human	NM_001007033	125.975	119.923	22.0783	0.979618	0.772007	-1.54169	89.3256	0.0143281	0.984161	0.661366	0	0	0	0	0.00653595
64581	CLEC7A	CLEC7A	C-type lectin domain family 7 member A	HGNC:14558	12p13.2-p12.3	hDG05I08	human	NM_022570	71.1703	146.767	67.0562	-0.754787	1.55214	-0.112415	94.9978	0.172709	0.81087	0.619496	0	0	0	0	NA
160365	DCAL1	CLECL1	C-type lectin like 1	HGNC:24462	12p13.31	hDG05I03	human	NM_172004	129.527	184.796	97.8838	1.09203	2.65733	0.867202	137.402	1.35673	0.0601359	0.238229	0	0	0	0	NA
1192	CLIC1	CLIC1	chloride intracellular channel 1	HGNC:2062	6p21.3	hDG12O20	human	NM_001288	79.0698	165.895	64.436	0.125263	1.29839	-0.437508	103.134	0.399879	0.579544	0.549398	0	0	0	0	0.00326797
1193	CLIC2	CLIC2	chloride intracellular channel 2	HGNC:2063	Xq28	hDG12A22	human	NM_001289	88.5298	165.072	94.7391	0.41433	1.28153	0.382819	116.114	0.762308	0.290861	0.421788	0	0	0	0	NA
9022	CLIC3	CLIC3	chloride intracellular channel 3	HGNC:2064	9q34.3	hDG12C22	human	NM_004669	117.54	156.842	104.167	1.3008	1.11291	0.638032	126.183	1.04346	0.148228	0.336948	0	0	0	0	NA
25932	CLIC4	CLIC4	chloride intracellular channel 4	HGNC:13518	1p	hDG12E22	human	NM_013943	56.9965	135.442	108.207	-0.549228	0.674491	0.747409	100.215	0.318393	0.659094	0.57744	0	0	0	0	0.00326797
53405	CLIC5	CLIC5	chloride intracellular channel 5	HGNC:13517	6p12.3	hDG12G22	human	NM_016929	33.0311	35.8539	42.2138	-1.28153	-1.36584	-1.03908	37.033	-1.44579	0.0451479	0.217027	-1	0	-1	0	0.00326797
54102	CLIC6	CLIC6	chloride intracellular channel 6	HGNC:2065	21q22.12	hDG12I22	human	NM_053277	31.1391	119.805	63.7626	-1.33935	0.354108	-0.455737	71.5688	-0.48148	0.50469	0.520809	0	0	0	0	0.00326797
1195	CLK1	CLK1	CDC like kinase 1	HGNC:2068	2q33	K01D07	human	NM_004071	106.401	105.314	168.497	-0.199497	0.235536	1.47076	126.738	1.05895	0.142306	0.333983	0	0	0	0	0.00980392
1196	CLK2	CLK2	CDC like kinase 2	HGNC:2069	1q21	DDRM11	human	NM_003993	145.194	140.508	84.8006	0.517791	0.792622	-0.513483	123.501	0.968583	0.179578	0.356204	0	0	0	0	0.0130719
1196	CLK2	CLK2	CDC like kinase 2	HGNC:2069	1q21	K01P05	human	NM_003993	135.824	90.2415	50.3389	0.550992	-0.182005	-1.4895	92.1348	0.0927683	0.897722	0.639902	0	0	0	0	0.0130719
1198	CLK3	CLK3	CDC like kinase 3	HGNC:2071	15q24	K01N05	human	NM_003992	130.237	126.184	80.2524	0.408494	0.813671	-0.740066	112.224	0.653715	0.365043	0.460458	0	0	0	0	0.00653595
57396	CLK4	CLK4	CDC like kinase 4	HGNC:13659	5q35	K02F07	human	NM_020666	47.0376	83.1445	87.1612	-0.711962	-0.252934	0.453346	72.4477	-0.456937	0.526638	0.529784	0	0	0	0	NA
79827	ASAM	CLMP	CXADR like membrane protein	HGNC:24039	11q24	hDG05A08	human	NM_024769	143.229	130.549	41.2824	1.52563	1.08081	-0.93144	105.02	0.452549	0.530642	0.531176	0	0	0	0	NA
1201	CLN3	CLN3	CLN3, battenin	HGNC:2074	16p12	hDG22G14	human	NM_000086	95.1351	184.679	48.8754	-0.134898	0.46572	-1.96135	109.563	0.579402	0.422117	0.487288	0	0	0	0	0.00980392
1207	CLNS1A	CLNS1A	chloride nucleotide-sensitive channel 1A	HGNC:2080	11q14.1	hDG12B14	human	NM_001293	72.1324	151.08	79.2508	-0.0867202	0.994874	-0.036459	100.821	0.33531	0.642217	0.572575	0	0	0	0	NA
8192	CLPP	CLPP	caseinolytic mitochondrial matrix peptidase proteolytic subunit	HGNC:2084	19p13.3	hDG28E04	human	NM_006012	89.3033	262.518	80.6709	0.345088	3.33873	0.241397	144.164	1.54554	0.0322798	0.192021	1	0	1	1	NA
9746	CLSTN3	CLSTN3	calsyntenin 3	HGNC:18371	12p13.31	hDG02N03	human	NM_014718	42.5251	45.3532	52.3204	-0.603492	-0.434078	-0.0733142	46.7329	-1.17495	0.10352	0.294888	0	0	0	0	0.00980392
23277	KIAA0664	CLUH	clustered mitochondria homolog	HGNC:29094	17p13.3	hDG23B12	human	NM_015229	104.852	68.5317	126.404	-0.408782	-1.26963	0.384387	99.9292	0.310406	0.667119	0.579593	0	0	0	0	NA
1215	CMA1	CMA1	chymase 1	HGNC:2097	14q12	hDG28G04	human	NM_001836	139.972	204.959	100.692	1.75681	2.09092	0.908788	148.541	1.66775	0.0208538	0.160584	1	0	1	1	0.00653595
1240	CMKLR1	CMKLR1	chemerin chemokine-like receptor 1	HGNC:2121	12q23.3	hDG08G13	human	NM_004072	137.151	112.719	148.783	1.55488	0.481779	2.16862	132.884	1.23058	0.0881794	0.279699	0	0	0	0	0.0130719
51727	CMPK	CMPK1	cytidine/uridine monophosphate kinase 1	HGNC:18170	1p34.1-p33	K02O10	human	NM_016308	34.3208	72.9462	65.0975	-1.12415	-0.505868	-0.187973	57.4548	-0.875572	0.225051	0.381196	0	0	0	0	0.00653595
202333	CMYA5	CMYA5	cardiomyopathy associated 5	HGNC:14305	5q14.1	hDG01A18	human	NM_153610	96.6531	76.8168	65.4813	1.38892	0.411702	0.347719	79.6504	-0.255824	0.722979	0.59778	0	0	0	0	0.0392157
7555	CNBP	CNBP	CCHC-type zinc finger nucleic acid binding protein	HGNC:13164	3q21	hDG23O16	human	NM_003418	100.598	169.99	93.4775	-0.517791	1.2035	-0.471418	121.355	0.908664	0.208024	0.373489	0	0	0	0	NA
84735	CNDP1	CNDP1	carnosine dipeptidase 1	HGNC:20675	18q22.3	hDG28I04	human	NM_032649	56.6502	121.731	51.7039	-0.56469	0.286659	-0.72419	76.695	-0.338346	0.639204	0.571841	0	0	0	0	0.00980392
55748	CNDP2	CNDP2	CNDP dipeptidase 2 (metallopeptidase M20 family)	HGNC:24437	18q22.3	hDG28K04	human	NM_018235	42.5757	103.841	89.1906	-0.956836	-0.101174	0.525393	78.5356	-0.286951	0.690922	0.586672	0	0	0	0	0.00326797
1259	CNGA1	CNGA1	cyclic nucleotide gated channel alpha 1	HGNC:2148	4p12	hDG06N06	human	NM_000087	64.5827	31.6662	66.8424	0.0741199	-0.610721	0.553082	54.3638	-0.961881	0.1826	0.358061	0	0	0	0	0.00980392
1260	CNGA2	CNGA2	cyclic nucleotide gated channel alpha 2	HGNC:2149	Xq27	hDG06P06	human	NM_005140	40.8858	48.8949	67.7797	-0.439778	-0.237911	0.580062	52.5201	-1.01336	0.160281	0.343559	0	0	0	0	0.0130719
1261	CNGA3	CNGA3	cyclic nucleotide gated channel alpha 3	HGNC:2150	2q11.2	hDG06B08	human	NM_001298	179.194	124.837	214.001	2.55961	1.40539	4.78888	172.677	2.34169	0.00117777	0.0408911	1	0	1	1	0.0130719
1262	CNGA4	CNGA4	cyclic nucleotide gated channel alpha 4	HGNC:2152	11p15.4	hDG06D08	human	NM_001037329	74.8362	81.0853	83.2455	0.296479	0.458654	1.02523	79.7223	-0.253815	0.725064	0.59778	0	0	0	0	0.00980392
1258	CNGB1	CNGB1	cyclic nucleotide gated channel beta 1	HGNC:2151	16q13	hDG06F08	human	NM_001297	107.42	59.0961	8.72876	1.00309	-0.0171689	-1.11965	58.4148	-0.848768	0.239591	0.38859	0	0	0	0	0.0261438
54714	CNGB3	CNGB3	cyclic nucleotide gated channel beta 3	HGNC:2153	8q21.3	hDG06H08	human	NM_019098	2.15038	16.4778	39.1916	-1.2798	-0.939382	-0.242817	19.2732	-1.94168	0.00713991	0.102247	-1	-1	-1	0	0.0196078
10175	CNIH	CNIH1	cornichon family AMPA receptor auxiliary protein 1	HGNC:19431	14q22.1	hDG09D22	human	NM_001009551	84.692	49.3981	95.2333	0.459436	-0.66152	1.07615	76.4411	-0.345434	0.632192	0.569616	0	0	0	0	NA
254263	CNIH2	CNIH2	cornichon family AMPA receptor auxiliary protein 2	HGNC:28744	11q13.2	hDG09E09	human	NM_182553	61.9015	50.6611	35.5984	-0.351908	-0.609636	-1.15194	49.387	-1.10084	0.127175	0.319316	0	0	0	0	NA
149111	CNIH3	CNIH3	cornichon family AMPA receptor auxiliary protein 3	HGNC:26802	1q42.12	hDG09G09	human	NM_152495	77.8274	99.9211	71.7039	0.215055	1.41384	0.197042	83.1508	-0.158086	0.82661	0.623573	0	0	0	0	NA
29097	CNIH4	CNIH4	cornichon family AMPA receptor auxiliary protein 4	HGNC:25013	1q42.12	hDG09I09	human	NM_014184	55.5861	70.5546	105.781	-0.576738	0.207536	1.47024	77.3072	-0.321251	0.656223	0.577035	0	0	0	0	NA
4850	CNOT4	CNOT4	CCR4-NOT transcription complex subunit 4	HGNC:7880	7q33	hDG20F16	human	NM_013316	47.6296	160.338	103.134	-1.33493	1.34898	1.15771	103.701	0.415708	0.564627	0.544352	0	0	0	0	0.00980392
1268	CNR1	CNR1	cannabinoid receptor 1	HGNC:2159	6q14-q15	hDG08K13	human	NM_033181	84.2685	118.219	104.474	-0.276896	0.644843	0.614726	102.32	0.377168	0.601239	0.556874	0	0	0	0	0.00980392
1269	CNR2	CNR2	cannabinoid receptor 2	HGNC:2160	1p	hDG08O13	human	NM_001841	93.6972	80.2188	87.4315	0.0496993	-0.481779	0.0170757	87.1158	-0.0473731	0.947662	0.649641	0	0	0	0	NA
1271	CNTFR	CNTFR	ciliary neurotrophic factor receptor	HGNC:2170	9p13	hDG05M10	human	NM_001842	70.1554	110.416	81.7119	-0.786906	0.49571	0.353305	87.4278	-0.0386627	0.957276	0.653045	0	0	0	0	NA
1272	CNTN1	CNTN1	contactin 1	HGNC:2171	12q12	hDG02P03	human	NM_001843	44.8207	39.4052	82.2605	-0.514743	-0.661135	1.14859	55.4954	-0.930282	0.197396	0.366612	0	0	0	0	0.0228758
6900	CNTN2	CNTN2	contactin 2	HGNC:2172	1q32.1	hDG02B05	human	NM_005076	42.066	39.4052	36.7515	-0.621241	-0.661135	-0.708704	39.4076	-1.37949	0.0559516	0.23376	0	0	0	0	0.0130719
5067	CNTN3	CNTN3	contactin 3	HGNC:2173	3p12.3	hDG02D05	human	NM_020872	84.3042	60.398	65.9731	1.01174	0.140241	0.483874	70.2251	-0.518999	0.472051	0.508042	0	0	0	0	0.0196078
152330	CNTN4	CNTN4	contactin 4	HGNC:2174	3p26.3	hDG03K16	human	NM_175607	36.3842	46.1166	59.5467	-0.805642	-0.538296	0.0954468	47.3492	-1.15774	0.108675	0.300977	0	0	0	0	0.0196078
53942	CNTN5	CNTN5	contactin 5	HGNC:2175	11q22.1	hDG03M16	human	NM_175566	46.9636	25.6134	41.8973	-0.331	-1.60192	-0.604496	38.1581	-1.41438	0.0500259	0.226118	0	0	0	0	0.0326797
27255	CNTN6	CNTN6	contactin 6	HGNC:2176	3p26.3	hDG02F05	human	NM_014461	54.0029	41.8544	46.0928	-0.159748	-0.567641	-0.32747	47.3167	-1.15865	0.108398	0.300744	0	0	0	0	0.0228758
8506	CNTNAP1	CNTNAP1	contactin associated protein 1	HGNC:8011	17q21	hDG06D12	human	NM_003632	96.4825	84.259	101.054	0.765905	0.527329	1.53784	93.932	0.142949	0.842984	0.625815	0	0	0	0	0.0196078
26047	CNTNAP2	CNTNAP2	contactin associated protein-like 2	HGNC:13830	7q35	hDG05M03	human	NM_014141	75.7374	71.2688	56.4435	-0.610254	-0.641985	-0.449661	67.8165	-0.58625	0.416602	0.484257	0	0	0	0	0.0588235
79937	CNTNAP3	CNTNAP3	contactin associated protein-like 3	HGNC:13834	9q12	hDG05O03	human	NM_033655	81.8268	108.179	27.132	-0.417542	0.430699	-1.3811	72.3793	-0.458849	0.524922	0.529505	0	0	0	0	0.00326797
85445	CNTNAP4	CNTNAP4	contactin associated protein like 4	HGNC:18747	16q23.1	hDG05P21	human	NM_033401	89.9461	168.018	118.099	-0.160593	2.16975	1.50957	125.354	1.02033	0.15744	0.341663	0	0	0	0	0.0163399
129684	CNTNAP5	CNTNAP5	contactin associated protein like 5	HGNC:18748	2q14.1	hDG05A05	human	NM_138996	75.2299	87.4869	22.5837	-0.626313	-0.170654	-1.52563	61.7668	-0.755171	0.295394	0.423986	0	0	0	0	0.0424837
80347	COASY	COASY	Coenzyme A synthase	HGNC:29932	17q21.2	K02A16	human	NM_025233	87.5	134.136	147.266	0.599547	1.01174	2.20039	122.967	0.953677	0.186366	0.360867	0	0	0	0	0.00326797
1300	COL10A1	COL10A1	collagen type X alpha 1 chain	HGNC:2185	6q21-q22	hDG02G10	human	NM_000493	67.3171	110.081	70.2844	0.354995	2.03683	0.659828	82.5608	-0.174559	0.808877	0.619129	0	0	0	0	0.00980392
1302	COL11A2	COL11A2	collagen type XI alpha 2 chain	HGNC:2187	6p21.3	hDG02I10	human	NM_080679	75.5811	79.9913	42.2605	0.674491	0.888191	-0.483874	65.9443	-0.638528	0.376285	0.466048	0	0	0	0	0.00980392
1305	COL13A1	COL13A1	collagen type XIII alpha 1 chain	HGNC:2190	10q22	hDG03E12	human	NM_005203	54.4806	54.8679	85.5395	0.00624528	-0.0843113	1.12627	64.9627	-0.665936	0.356142	0.455038	0	0	0	0	0.00980392
1308	COL17A1	COL17A1	collagen type XVII alpha 1 chain	HGNC:2194	10q24.3	hDG03G12	human	NM_000494	55.0374	74.621	66.6065	0.0312264	0.940396	0.375424	65.4216	-0.653121	0.365471	0.460458	0	0	0	0	0.0228758
80781	COL18A1	COL18A1	collagen type XVIII alpha 1 chain	HGNC:2195	21q22.3	hDG02K10	human	NM_130445	53.0846	39.0553	47.7695	-0.195247	-0.674491	-0.259044	46.6365	-1.17764	0.102732	0.294084	0	0	0	0	0.00326797
1278	COL1A2	COL1A2	collagen type I alpha 2 chain	HGNC:2198	7q21.3	hDG02M10	human	NM_000089	127.461	117.428	89.2066	2.68021	2.31731	1.43207	111.365	0.629722	0.382903	0.468523	0	0	0	0	0.0424837
1281	COL3A1	COL3A1	collagen type III alpha 1 chain	HGNC:2201	2q32.2	hDG02O10	human	NM_000090	117.819	43.6038	102.859	2.30747	-0.500859	1.98926	88.0941	-0.0200574	0.977828	0.659014	0	0	0	0	0.0392157
1289	COL5A1	COL5A1	collagen type V alpha 1 chain	HGNC:2209	9q34.2-q34.3	hDG02A12	human	NM_000093	88.8953	49.2018	104.775	1.18923	-0.287159	2.06746	80.9575	-0.219326	0.761201	0.608452	0	0	0	0	0.0261438
1290	COL5A2	COL5A2	collagen type V alpha 2 chain	HGNC:2210	2q14-q32	hDG02C12	human	NM_000393	45.2798	58.2987	36.0329	-0.496993	0.0601031	-0.73803	46.5371	-1.18042	0.101925	0.293044	0	0	0	0	0.0359477
1292	COL6A2	COL6A2	collagen type VI alpha 2 chain	HGNC:2212	21q22.3	hDG02E12	human	NM_001849	41.1478	63.5469	46.0928	-0.656741	0.260447	-0.32747	50.2625	-1.0764	0.135838	0.327076	0	0	0	0	0.0163399
1293	COL6A3	COL6A3	collagen type VI alpha 3 chain	HGNC:2213	2q37	hDG02G12	human	NM_004369	49.4118	77.5421	105.494	-0.337245	0.794697	2.09679	77.4826	-0.316353	0.661136	0.577778	0	0	0	0	0.0359477
1294	COL7A1	COL7A1	collagen type VII alpha 1 chain	HGNC:2214	3p21.1	hDG03E21	human	NM_000094	20.5151	56.3682	58.2631	-1.5176	-0.00648549	0.0445418	45.0488	-1.22198	0.0904254	0.281165	0	0	0	0	0.0130719
1295	COL8A1	COL8A1	collagen type VIII alpha 1 chain	HGNC:2215	3q11.1-q13.2	hDG02H05	human	NM_001850	22.3242	39.0553	47.2904	-1.38448	-0.674491	-0.278594	36.2233	-1.4684	0.0418925	0.211401	-1	0	-1	0	0.0130719
1297	COL9A1	COL9A1	collagen type IX alpha 1 chain	HGNC:2217	6q13	hDG03I12	human	NM_001851	50.3045	31.6143	53.4497	-0.181113	-1.29061	-0.146352	45.1228	-1.21991	0.0909693	0.281524	0	0	0	0	0.00653595
1298	COL9A2	COL9A2	collagen type IX alpha 2 chain	HGNC:2218	1p33-p32	hDG02I12	human	NM_001852	61.8077	28.2091	44.4162	0.141998	-1.08853	-0.395897	44.811	-1.22862	0.088687	0.279979	0	0	0	0	0.0130719
81035	COLEC12	COLEC12	collectin subfamily member 12	HGNC:16016	18p11.32	hDG05M04	human	NM_030781	89.4386	101.468	57.4542	-0.176652	0.235665	-0.417542	82.7869	-0.168244	0.815664	0.620166	0	0	0	0	0.00980392
8292	COLQ	COLQ	collagen like tail subunit of asymmetric acetylcholinesterase	HGNC:2226	3p	hDG03K12	human	NM_005677	37.7762	55.8681	50.5616	-0.743189	-0.0324274	-0.260888	48.0686	-1.13765	0.114946	0.305862	0	0	0	0	0.00326797
1311	COMP	COMP	cartilage oligomeric matrix protein	HGNC:2227	19p13.1	hDG09N21	human	NM_000095	102.54	149.813	70.4868	1.09483	3.46325	0.151571	107.613	0.524955	0.466997	0.505641	0	0	0	0	NA
1312	COMT	COMT	catechol-O-methyltransferase	HGNC:2228	22q11.21	hDG31I09	human	NM_000754	281.784	245.849	145.435	3.57958	2.22957	1.08384	224.356	3.78467	1.5894e-07	0.000105299	1	1	1	1	NA
118881	COMTD1	COMTD1	catechol-O-methyltransferase domain containing 1	HGNC:26309	10q22.2	hDG31C18	human	NM_144589	69.962	49.6573	79.5857	-0.488607	-0.786906	-0.320965	66.4017	-0.625757	0.385904	0.469353	0	0	0	0	0.00326797
9318	COPS2	COPS2	COP9 signalosome subunit 2	HGNC:30747	15q21.2	hDG01E03	human	NM_004236	37.3093	64.3775	29.9763	-1.61079	-0.218991	-1.61291	43.8877	-1.2544	0.0821966	0.2716	0	0	0	0	0.00326797
27235	COQ2	COQ2	coenzyme Q2, polyprenyltransferase	HGNC:25223	4q21.23	hDG31K09	human	NM_015697	60.0069	63.0617	73.0444	-0.679802	-0.580811	-0.460514	65.371	-0.654535	0.364434	0.460458	0	0	0	0	NA
51805	COQ3	COQ3	coenzyme Q3, methyltransferase	HGNC:18175	6q21	hDG31M09	human	NM_017421	61.113	59.4059	48.1875	-0.658558	-0.637019	-0.990804	56.2355	-0.909618	0.207529	0.373154	0	0	0	0	NA
84274	COQ5	COQ5	coenzyme Q5, methyltransferase	HGNC:28722	12q24.31	hDG31O09	human	NM_032314	73.2803	89.8705	63.0144	-0.424876	-0.168623	-0.674491	75.3884	-0.374827	0.603498	0.557741	0	0	0	0	0.00326797
51004	COQ6	COQ6	coenzyme Q6, monooxygenase	HGNC:20233	14q24.1	hDG25H15	human	NM_182480	183.151	144.722	129.758	0.897258	1.00424	0.640766	152.544	1.77951	0.0136797	0.137668	1	0	1	0	0.00326797
56997	CABC1	COQ8A	coenzyme Q8A	HGNC:16812	1q42.11	K02H05	human	NM_020247	119.87	137.535	78.0314	1.64876	1.09605	0.187973	111.812	0.642205	0.373549	0.464561	0	0	0	0	NA
79934	ADCK4	COQ8B	coenzyme Q8B	HGNC:19041	19q13.2	K02B11	human	NM_024876	49.3497	65.0142	28.5782	-0.637019	-0.702595	-1.24947	47.6474	-1.14942	0.111242	0.30436	0	0	0	0	NA
10699	CORIN	CORIN	corin, serine peptidase	HGNC:19012	4p12	hDG28K03	human	NM_006587	132.09	150.51	79.819	1.53721	0.910563	0.212997	120.806	0.893344	0.215789	0.377207	0	0	0	0	0.00653595
11151	CORO1A	CORO1A	coronin 1A	HGNC:2252	16p11.2	hDG02M05	human	NM_007074	88.8953	43.2539	45.6138	1.18923	-0.514216	-0.347021	59.2543	-0.825327	0.252798	0.397275	0	0	0	0	0.00653595
1352	COX10	COX10	COX10, heme A:farnesyltransferase cytochrome c oxidase assembly factor	HGNC:2260	17p12	hDG31A22	human	NM_001303	54.4763	39.2993	112.728	-0.786021	-0.946161	0.386088	68.8346	-0.557823	0.439572	0.495483	0	0	0	0	0.00326797
1356	CP	CP	ceruloplasmin	HGNC:2295	3q23-q25	hDG25L04	human	NM_000096	162.311	60.8417	88.2353	0.513603	-1.19909	-0.37097	103.796	0.418373	0.562131	0.543353	0	0	0	0	0.0130719
1357	CPA1	CPA1	carboxypeptidase A1	HGNC:2296	7q32	hDG28M04	human	NM_001868	97.7481	131.842	58.0937	0.580376	0.505868	-0.511193	95.8948	0.197754	0.784077	0.612216	0	0	0	0	NA
1358	CPA2	CPA2	carboxypeptidase A2	HGNC:2297	7q32	hDG28O04	human	NM_001869	116.89	128.731	55.5378	1.11369	0.438419	-0.596392	100.386	0.323164	0.654315	0.576665	0	0	0	0	0.00326797
1359	CPA3	CPA3	carboxypeptidase A3	HGNC:2298	3q24	hDG28A06	human	NM_001870	76.3547	164.511	66.6134	-0.0156858	1.21408	-0.227197	102.493	0.381996	0.596614	0.555203	0	0	0	0	0.00653595
51200	CPA4	CPA4	carboxypeptidase A4	HGNC:15740	7q32	hDG28C06	human	NM_016352	49.8944	68.0603	122.417	-0.75292	-0.876838	1.63298	80.1241	-0.242598	0.736762	0.601406	0	0	0	0	0.00653595
93979	CPA5	CPA5	carboxypeptidase A5	HGNC:15722	7q32	hDG29O03	human	NM_080385	82.9518	101.138	76.347	-0.477764	-0.125753	-0.598133	86.8124	-0.0558448	0.93832	0.648086	0	0	0	0	0.00980392
57094	CPA6	CPA6	carboxypeptidase A6	HGNC:17245	8q12.3	hDG29A05	human	NM_020361	75.2989	104.641	47.8539	-0.674491	-0.0685923	-1.09446	75.9313	-0.35967	0.618226	0.563433	0	0	0	0	0.00980392
1360	CPB1	CPB1	carboxypeptidase B1	HGNC:2299	3q24	hDG29M19	human	NM_001871	96.6177	69.6147	20.8219	-0.126467	-0.640195	-1.56533	62.3514	-0.738848	0.305959	0.431233	0	0	0	0	0.00653595
1361	CPB2	CPB2	carboxypeptidase B2	HGNC:2300	13q14.11	hDG28E06	human	NM_001872	100	155.177	166.294	0.643119	1.01174	3.09556	140.49	1.44296	0.0455769	0.217027	1	0	1	1	0.00980392
1362	CPD	CPD	carboxypeptidase D	HGNC:2301	17q11.2	hDG28G06	human	NM_001304	109.571	114.73	36.7945	0.909778	0.134898	-1.22118	87.0318	-0.0497191	0.945077	0.649116	0	0	0	0	0.00980392
1363	CPE	CPE	carboxypeptidase E	HGNC:2303	4q32.3	hDG28I06	human	NM_001873	119.141	89.8396	62.7796	1.17644	-0.404694	-0.354995	90.5869	0.0495461	0.945266	0.649132	0	0	0	0	NA
1368	CPM	CPM	carboxypeptidase M	HGNC:2311	12q15	hDG28K06	human	NM_001874	37.5088	31.5022	38.4984	-1.09801	-1.66936	-1.16438	35.8365	-1.4792	0.0404074	0.208212	-1	0	-1	0	0.00980392
1369	CPN1	CPN1	carboxypeptidase N subunit 1	HGNC:2312	10q24.2	hDG28M06	human	NM_001308	62.2801	87.5061	73.0032	-0.407832	-0.455281	-0.0141998	74.2631	-0.406248	0.573493	0.547199	0	0	0	0	0.00326797
131034	CPNE4	CPNE4	copine 4	HGNC:2317	3q22.1	hDG01H09	human	NM_130808	67.8591	88.2194	104.628	-0.0665616	0.989837	2.50944	86.9021	-0.0533403	0.941082	0.648638	0	0	0	0	0.0130719
130749	CPO	CPO	carboxypeptidase O	HGNC:21011	2q34	hDG29O19	human	NM_173077	57.8066	135.464	48.5845	-1.12415	0.434418	-1.08173	80.6184	-0.228795	0.751234	0.605581	0	0	0	0	0.00653595
1371	CPOX	CPOX	coproporphyrinogen oxidase	HGNC:2321	3q12	hDG25C15	human	NM_000097	157.605	183.524	146.367	0.426971	2.02347	1.04546	162.498	2.05747	0.00436308	0.0806133	1	0	1	1	0.00326797
10404	PGCP	CPQ	carboxypeptidase Q	HGNC:16910	8q22.2	hDG29G17	human	NM_016134	76.3922	199.212	143.562	-0.646387	1.47473	0.572681	139.722	1.4215	0.0489023	0.223435	1	0	1	0	0.0130719
1373	CPS1	CPS1	carbamoyl-phosphate synthase 1	HGNC:2323	2p	hDG01M11	human	NM_001875	78.5691	84.5913	87.7857	0.474806	0.805885	1.5794	83.6487	-0.144183	0.841647	0.625815	0	0	0	0	0.0359477
54973	CPSF3L	CPSF3L	cleavage and polyadenylation specific factor 3-like	HGNC:26052	1p36.33	hDG23J04	human	NM_032179	99.5347	122.787	85.6645	-0.545043	0.0529012	-0.674491	102.662	0.386715	0.592064	0.552904	0	0	0	0	NA
1374	CPT1A	CPT1A	carnitine palmitoyltransferase 1A	HGNC:2328	11q13.2	hDG31C22	human	NM_001876	86.0007	142.27	203.434	-0.180572	0.637019	2.32118	143.901	1.53821	0.0330785	0.194409	1	0	1	1	0.0130719
1375	CPT1B	CPT1B	carnitine palmitoyltransferase 1B	HGNC:2329	22q13.33	hDG31A11	human	NM_152247	203.802	103.275	80.4579	2.08189	0.0374717	-0.302358	129.178	1.1271	0.118389	0.308574	0	0	0	0	0.00980392
126129	CPT1C	CPT1C	carnitine palmitoyltransferase 1C	HGNC:18540	19q13.33	hDG31C11	human	NM_152359	120.843	80.7312	65.1949	0.488607	-0.309142	-0.627974	88.9231	0.00309165	0.996582	0.664057	0	0	0	0	0.0163399
1376	CPT2	CPT2	carnitine palmitoyltransferase 2	HGNC:2330	1p32.3	hDG31E11	human	NM_000098	176.149	136.786	118.833	1.5508	0.552708	0.516334	143.923	1.5388	0.0329994	0.194208	1	0	1	0	0.00653595
54504	CPVL	CPVL	carboxypeptidase, vitellogenic like	HGNC:14399	7p15.1	hDG28O06	human	NM_019029	76.9177	82.0613	91.7465	0	-0.573317	0.610592	83.5752	-0.146236	0.839423	0.625358	0	0	0	0	0.00980392
56265	CPXM	CPXM1	carboxypeptidase X, M14 family member 1	HGNC:15771	20p13	hDG28A05	human	NM_019609	133.779	122.509	132.215	1.58427	0.303521	1.95957	129.501	1.13611	0.11544	0.306053	0	0	0	0	0.00653595
119587	CPXM2	CPXM2	carboxypeptidase X, M14 family member 2	HGNC:26977	10q26	hDG29C05	human	NM_198148	55.6201	67.5131	101.187	-1.18036	-0.674491	-0.165441	74.7735	-0.391998	0.587017	0.551937	0	0	0	0	0.0163399
8532	CPZ	CPZ	carboxypeptidase Z	HGNC:2333	4p16.1	hDG29E05	human	NM_001014447	97.1643	67.5131	185.205	-0.112415	-0.674491	1.29808	116.628	0.776661	0.281895	0.415286	0	0	0	0	NA
1379	CR1L	CR1L	complement component 3b/4b receptor 1-like	HGNC:2335	1q32.1	hDG05E06	human	XM_936931	90.4535	85.2499	38.7555	-0.144534	-0.235665	-1.01174	71.4863	-0.483782	0.502642	0.520104	0	0	0	0	0.00653595
1380	CR2	CR2	complement component 3d receptor 2	HGNC:2336	1q32	hDG05G06	human	NM_001006658	123.945	96.9941	38.2502	0.91538	0.105643	-1.0278	86.3966	-0.0674563	0.925533	0.645784	0	0	0	0	0.0163399
1382	CRABP2	CRABP2	cellular retinoic acid binding protein 2	HGNC:2339	1q21.3	hDG30I05	human	NM_001878	81.9936	103.634	114.745	-0.0948503	0.257894	0.631254	100.124	0.315855	0.661631	0.578059	0	0	0	0	0.00653595
8738	CRADD	CRADD	CASP2 and RIPK1 domain containing adaptor with death domain	HGNC:2340	12q22	hDG28A08	human	NM_003805	90.9923	87.5061	77.689	0.392146	-0.455281	0.141998	85.3958	-0.0953998	0.894833	0.639516	0	0	0	0	0.00326797
1384	CRAT	CRAT	carnitine O-acetyltransferase	HGNC:2342	9q34.1	hDG31G11	human	NM_000755	165.641	197.715	170.292	1.34898	1.4895	1.61413	177.883	2.48703	0.00056968	0.0264768	1	0	1	0	NA
23418	CRB1	CRB1	crumbs 1, cell polarity complex component	HGNC:2343	1q31.3	hDG05O05	human	NM_012076	47.32	107.62	42.2931	-1.50957	0.414446	-0.899321	65.7443	-0.644112	0.372136	0.463674	0	0	0	0	0.0490196
286204	CRB2	CRB2	crumbs 2, cell polarity complex component	HGNC:18688	9q33.2	hDG05A07	human	NM_173689	59.4989	127.193	10.4548	-1.12415	0.983294	-1.91106	65.7157	-0.644911	0.371567	0.463662	0	0	0	0	0.00980392
51185	CRBN	CRBN	cereblon	HGNC:30185	3p26.3	hDG29A21	human	NM_016302	111.923	157.881	33.242	0.266986	0.800243	-1.34898	101.015	0.340735	0.636859	0.570827	0	0	0	0	0.00326797
1392	CRH	CRH	corticotropin releasing hormone	HGNC:2355	8q13	hDG10M19	human	NM_000756	79.1862	46.0262	80.4111	0.686754	-0.760335	0.319016	68.5412	-0.566017	0.432869	0.492504	0	0	0	0	NA
1394	CRHR1	CRHR1	corticotropin releasing hormone receptor 1	HGNC:2357	17q21.31	hDG08A15	human	NM_004382	124.443	163.219	79.154	1.11468	1.979	-0.273211	122.272	0.934259	0.1955	0.365638	0	0	0	0	NA
1395	CRHR2	CRHR2	corticotropin releasing hormone receptor 2	HGNC:2358	7p14.3	hDG08N21	human	NM_001883	94.927	48.2188	55.7821	0.0922987	-1.43051	-1.09285	66.3093	-0.628336	0.383953	0.46872	0	0	0	0	0.0130719
9419	CRIPT	CRIPT	CXXC repeat containing interactor of PDZ3 domain	HGNC:14312	2p21	hDG20L18	human	NM_014171	133.556	104.304	77.7568	0.702595	0.0766467	0.312078	105.205	0.457727	0.525927	0.529505	0	0	0	0	NA
1399	CRKL	CRKL	CRK like proto-oncogene, adaptor protein	HGNC:2363	22q11.21	K01D21	human	NM_005207	125.396	67.4396	95.2092	0.284996	-0.813671	-0.365349	96.0148	0.201107	0.780507	0.611605	0	0	0	0	0.00326797
9244	CRLF1	CRLF1	cytokine receptor like factor 1	HGNC:2364	19p12	hDG05O10	human	NM_004750	74.7225	71.828	90.3032	-0.642372	-0.625732	0.626313	78.9512	-0.275345	0.702809	0.590549	0	0	0	0	0.00326797
64109	CRLF2	CRLF2	cytokine receptor-like factor 2	HGNC:14281	Xp22.3 and Yp11.3	hDG06P18	human	NM_001012288	56.3799	58.8694	107.616	-0.103768	-0.0220742	1.7267	74.2883	-0.405544	0.574164	0.547319	0	0	0	0	0.00326797
54675	CRLS1	CRLS1	cardiolipin synthase 1	HGNC:16148	20p13-p12.3	hDG31I11	human	NM_019095	197.719	167.86	193.404	1.96505	1.03047	2.1072	186.328	2.72283	0.000161789	0.0134065	1	1	1	1	0.00326797
51340	CRNKL1	CRNKL1	crooked neck pre-mRNA splicing factor 1	HGNC:15762	20p11.2	hDG23L04	human	NM_016652	114.955	124.415	81.7579	-0.149887	0.0925772	-0.776027	107.043	0.509029	0.480608	0.511562	0	0	0	0	0.00326797
54677	CROT	CROT	carnitine O-octanoyltransferase	HGNC:2366	7q21.1	hDG31K11	human	NM_021151	210.992	191.013	200.382	2.21998	1.38645	2.25606	200.796	3.12681	1.47966e-05	0.00254147	1	1	1	1	0.00653595
55118	CRTAC1	CRTAC1	cartilage acidic protein 1	HGNC:14882	10q22	hDG30I15	human	NM_018058	150.589	79.1498	151.191	1.16982	-0.456273	1.76405	126.977	1.06563	0.13981	0.331537	0	0	0	0	0.00326797
56253	CRTAM	CRTAM	cytotoxic and regulatory T-cell molecule	HGNC:24313	11q24.1	hDG07E06	human	NM_019604	73.9192	84.2658	66.2134	-0.594047	0.84563	-0.233734	74.7995	-0.391272	0.587705	0.552056	0	0	0	0	NA
1407	CRY1	CRY1	cryptochrome circadian clock 1	HGNC:2384	12q23-q24.1	hDG23K21	human	NM_004075	112.828	127.128	82.8741	-0.204391	0.158704	-0.747017	107.61	0.52487	0.467058	0.505641	0	0	0	0	0.00980392
1408	CRY2	CRY2	cryptochrome circadian clock 2	HGNC:2385	11p11.2	hDG23M21	human	NM_021117	169.724	268.735	99.6163	1.2536	3.61051	-0.311861	179.359	2.52824	0.000461513	0.0241786	1	0	1	1	0.00326797
1408	CRY2	CRY2	cryptochrome circadian clock 2	HGNC:2385	11p11.2	DDRD08	human	NM_001127457 NM_021117	103.22	78.5894	59.4996	-0.231643	-0.495389	-1.09659	80.4362	-0.233881	0.745882	0.604202	0	0	0	0	0.00326797
1418	CRYGA	CRYGA	crystallin gamma A	HGNC:2408	2q34	hDG01A11	human	NM_014617	51.7064	89.0833	56.6809	-0.88305	1.03364	-0.13825	65.8235	-0.6419	0.37377	0.464711	0	0	0	0	0.00326797
1419	CRYGB	CRYGB	crystallin gamma B	HGNC:2409	2q34	hDG01C11	human	NM_005210	81.5538	41.9177	40.5974	0.625679	-1.35774	-1.0264	54.6897	-0.952781	0.186775	0.361291	0	0	0	0	0.00326797
1420	CRYGC	CRYGC	crystallin gamma C	HGNC:2410	2q33.3	hDG01E11	human	NM_020989	121.585	46.4097	68.3642	2.64915	-1.12999	0.506915	78.7861	-0.279956	0.698085	0.58926	0	0	0	0	NA
1421	CRYGD	CRYGD	crystallin gamma D	HGNC:2411	2q33.3	hDG01G11	human	NM_006891	58.7293	87.8739	46.9701	-0.528055	0.972318	-0.674491	64.5244	-0.678173	0.347375	0.451065	0	0	0	0	NA
51084	CRYL1	CRYL1	crystallin lambda 1	HGNC:18246	13q11	hDG25E15	human	NM_015974	234.916	168.117	94.4637	1.85021	1.61878	-0.219209	165.832	2.15056	0.00288943	0.0622659	1	0	1	0	NA
1428	CRYM	CRYM	crystallin mu	HGNC:2418	16p12.2	hDG22A10	human	NM_001014444	133.338	239.686	75.3625	1.21408	1.20445	-0.674491	149.462	1.69348	0.0189747	0.155074	1	0	1	0	NA
1429	CRYZ	CRYZ	crystallin zeta	HGNC:2419	1p31.1	hDG25G15	human	NM_001889	168.361	131.598	192.734	0.624987	0.659502	2.17523	164.231	2.10585	0.00352724	0.0708126	1	0	1	1	0.00653595
9946	CRYZL1	CRYZL1	crystallin zeta like 1	HGNC:2420	21q22.1	hDG25I15	human	NM_005111	113.908	87.0899	99.308	-0.377467	-0.509615	-0.101174	100.102	0.315224	0.662265	0.578286	0	0	0	0	0.00653595
51380	CSAD	CSAD	cysteine sulfinic acid decarboxylase	HGNC:18966	12q13.11-q14.3	hDG22C10	human	NM_015989	107.074	255.232	139.479	0.286659	1.41322	2.44059	167.262	2.19047	0.00240968	0.0584887	1	0	1	1	0.00653595
1434	CSE1L	CSE1L	chromosome segregation 1 like	HGNC:2431	20q13	hDG12D14	human	NM_001316	51.3205	81.1214	59.0488	-0.722669	-0.438419	-0.583343	63.8302	-0.697557	0.333766	0.444652	0	0	0	0	0.00653595
1435	CSF1	CSF1	colony stimulating factor 1	HGNC:2432	1p13.3	hDG09G16	human	NM_000757	30.5989	20.9789	29.1075	-1.46628	-1.82891	-1.39445	26.8951	-1.72887	0.0166003	0.148099	-1	0	-1	0	0.00326797
1436	CSF1R	CSF1R	colony stimulating factor 1 receptor	HGNC:2433	5q32	K01F21	human	NM_005211	96.3454	139.71	87.7308	-0.455994	1.18839	-0.552708	107.929	0.53377	0.459541	0.504042	0	0	0	0	NA
1437	CSF2	CSF2	colony stimulating factor 2	HGNC:2434	5q23-q31	hDG09E04	human	NM_000758	89.6345	54.1346	39.2495	0.63539	-0.466955	-1.01553	61.0062	-0.77641	0.282015	0.415286	0	0	0	0	NA
1438	CSF2RA	CSF2RA	colony stimulating factor 2 receptor alpha subunit	HGNC:2435	Xp22.32 and Yp11.3	hDG05A12	human	NM_006140	51.8871	81.8944	41.2824	-1.36504	-0.333182	-0.93144	58.3546	-0.850447	0.23864	0.387772	0	0	0	0	0.00326797
1439	CSF2RB	CSF2RB	colony stimulating factor 2 receptor beta common subunit	HGNC:2436	22q12.3	hDG06B20	human	NM_000395	63.4435	105.115	123.55	0.0494132	0.978625	2.18535	97.3694	0.23893	0.740594	0.602225	0	0	0	0	0.0163399
1440	CSF3	CSF3	colony stimulating factor 3	HGNC:2438	17q11.2-q12	hDG10E05	human	NM_000759	25.473	15.6275	32.0601	-1.33672	-1.63104	-1.47659	24.3869	-1.7989	0.012686	0.13198	-1	0	-1	0	NA
1441	CSF3R	CSF3R	colony stimulating factor 3 receptor	HGNC:2439	1p35-p34.3	hDG05C12	human	NM_000760	69.648	84.6907	75.6475	-0.802965	-0.251918	0.160593	76.662	-0.339265	0.638282	0.571771	0	0	0	0	0.00653595
55454	GALNACT-2	CSGALNACT2	chondroitin sulfate N-acetylgalactosaminyltransferase 2	HGNC:24292	10q11.21	hDG31O17	human	NM_018590	54.4763	67.936	42.9545	-0.786021	-0.505868	-1.10244	55.1223	-0.940702	0.192419	0.365238	0	0	0	0	0.0130719
1445	CSK	CSK	c-src tyrosine kinase	HGNC:2444	15q24.1	K02H10	human	NM_004383	57.4422	60.4816	100.095	-0.374717	-0.81501	0.829292	72.673	-0.450649	0.532344	0.531598	0	0	0	0	0.00326797
1452	CSNK1A1	CSNK1A1	casein kinase 1 alpha 1	HGNC:2451	5q32	K01C18	human	NM_001892	94.8557	43.0918	76.1393	-0.493993	-1.48816	-0.843113	71.3623	-0.487247	0.499587	0.518454	0	0	0	0	NA
122011	CSNK1A1L	CSNK1A1L	casein kinase 1 alpha 1 like	HGNC:20289	13q13.2	K01N18	human	NM_145203	81.4479	103.382	170.741	-0.835989	0.182005	1.52697	118.523	0.829596	0.250368	0.395333	0	0	0	0	NA
1453	CSNK1D	CSNK1D	casein kinase 1 delta	HGNC:2452	17q25	K01E18	human	NM_001893	71.0196	70.9179	118.018	-1.10198	-0.717316	0.206094	86.6519	-0.0603269	0.933382	0.647605	0	0	0	0	NA
1453	CSNK1D	CSNK1D	casein kinase 1 delta	HGNC:2452	17q25	DDRP04	human	NM_001893 NM_139062	37.2049	42.3174	21.7371	-1.4103	-1.2499	-1.9669	33.7531	-1.53738	0.0331594	0.194409	-1	0	-1	0	NA
1454	CSNK1E	CSNK1E	casein kinase 1 epsilon	HGNC:2453	22q13.1	DDRI04	human	NM_001894 NM_152221	137.181	99.8397	107.836	0.374717	-0.0533496	0.0174062	114.952	0.729878	0.311856	0.43453	0	0	0	0	0.00653595
1454	CSNK1E	CSNK1E	casein kinase 1 epsilon	HGNC:2453	22q13.1	K02F18	human	NM_152221	48.1936	109.207	57.4893	-0.674491	0.393453	-0.409117	71.6299	-0.479773	0.506192	0.521548	0	0	0	0	0.00653595
53944	CSNK1G1	CSNK1G1	casein kinase 1 gamma 1	HGNC:2454	15q22.1-q22.31	K01K08	human	NM_001011664	138.804	143.961	72.0262	0.626991	1.30616	-0.946161	118.264	0.822343	0.254528	0.397732	0	0	0	0	0.00326797
1455	CSNK1G2	CSNK1G2	casein kinase 1 gamma 2	HGNC:2455	19p13.3	K01A14	human	NM_001319	71.392	116.908	105.679	-1.09249	0.556723	-0.103047	97.993	0.256343	0.722442	0.59778	0	0	0	0	NA
1456	CSNK1G3	CSNK1G3	casein kinase 1 gamma 3	HGNC:2456	5q23	K01P09	human	NM_004384	78.8408	73.6232	73.8958	-0.902488	-0.642372	-0.899321	75.4532	-0.373017	0.605246	0.558578	0	0	0	0	NA
1457	CSNK2A1	CSNK2A1	casein kinase 2 alpha 1	HGNC:2457	20p13	K01G18	human	NM_001895	125.768	111.498	86.609	0.294496	0.406836	-0.580811	107.958	0.534593	0.458846	0.503887	0	0	0	0	0.0196078
1459	CSNK2A2	CSNK2A2	casein kinase 2 alpha 2	HGNC:2459	16q21	K01I18	human	NM_001896	129.865	174.879	146.062	0.398995	2.16265	0.908689	150.269	1.71599	0.0174265	0.151146	1	0	1	1	0.00326797
1460	CSNK2B	CSNK2B	casein kinase 2 beta	HGNC:2460	6p21.33	hDG04G05	human	NM_001320	118.923	33.1712	39.1898	0.756247	-1.00286	-1.18267	63.7612	-0.699485	0.332455	0.444536	0	0	0	0	0.00653595
1471	CST3	CST3	cystatin C	HGNC:2475	20p11.2	hDG04D03	human	NM_000099	178.182	53.9251	95.2737	1.8804	-0.150873	1.07179	109.127	0.567223	0.431929	0.492301	0	0	0	0	NA
9150	CTDP1	CTDP1	CTD phosphatase subunit 1	HGNC:2498	18q23	hDG27B06	human	NM_004715	68.6958	120.586	126.517	-0.527486	0.0595139	0.212511	105.266	0.459428	0.524392	0.529477	0	0	0	0	0.00653595
58190	CTDSP1	CTDSP1	CTD small phosphatase 1	HGNC:21614	2q35	hDG27D20	human	NM_021198	40.9426	64.654	68.1515	-1.4441	-0.922465	-0.748408	57.916	-0.862695	0.231943	0.384158	0	0	0	0	0.00326797
10106	CTDSP2	CTDSP2	CTD small phosphatase 2	HGNC:17077	12q14.1	hDG27H15	human	NM_005730	112.944	79.3432	76.0084	0.93391	-0.664572	-0.619053	89.4318	0.0172954	0.98088	0.660147	0	0	0	0	0.00653595
10217	CTDSPL	CTDSPL	CTD small phosphatase like	HGNC:16890	3p21.3	hDG27F15	human	NM_001008392	104.566	169.739	207.331	0.657196	0.922465	1.54301	160.545	2.00293	0.00552134	0.0907688	1	0	1	0	NA
1493	CTLA4	CTLA4	cytotoxic T-lymphocyte associated protein 4	HGNC:2505	2q33	hDG09I11	human	NM_005214	66.5694	26.9785	61.1562	-0.185729	-1.58246	-0.197042	51.568	-1.03994	0.149599	0.33793	0	0	0	0	0.00326797
1496	CTNNA2	CTNNA2	catenin alpha 2	HGNC:2510	2p12-p11.1	hDG02O05	human	NM_004389	40.6887	69.4949	60.7036	-0.674491	0.487503	0.268819	56.9624	-0.889322	0.217851	0.378266	0	0	0	0	0.0588235
1499	CTNNB1	CTNNB1	catenin beta 1	HGNC:2514	3p21	hDG09J20	human	NM_001904	89.909	76.5542	89.9594	0.645165	0.453984	0.879112	85.4742	-0.0932099	0.897234	0.639902	0	0	0	0	0.00653595
1501	CTNND2	CTNND2	catenin delta 2	HGNC:2516	5p15.2	hDG02J05	human	NM_001332	26.9154	27.8592	31.9611	-1.20698	-1.10189	-0.904209	28.9119	-1.67255	0.0204803	0.159627	-1	0	-1	0	0.0751634
1497	CTNS	CTNS	cystinosin, lysosomal cystine transporter	HGNC:2518	17p13	hDG12F14	human	NM_004937	103.035	122.274	88.6785	0.857567	0.404694	0.218754	104.662	0.442566	0.539721	0.535011	0	0	0	0	0.00326797
56474	CTPS2	CTPS2	CTP synthase 2	HGNC:2520	Xp22	DDRF19	human	NM_001144002 NM_019857 NM_175859	138.707	96.5422	73.8494	0.401969	-0.121942	-0.765873	103.033	0.39707	0.582193	0.550453	0	0	0	0	NA
1504	CTRB1	CTRB1	chymotrypsinogen B1	HGNC:2521	16q23.1	hDG28C08	human	NM_001906	72.4138	79.7278	64.9095	-0.125487	-0.623904	-0.283996	72.3503	-0.459657	0.524176	0.529477	0	0	0	0	NA
11330	CTRC	CTRC	chymotrypsin C	HGNC:2523	1p36.21	hDG29G05	human	NM_007272	179.16	284.676	184.475	1.99537	2.86944	1.28535	216.103	3.55424	8.51808e-07	0.000246893	1	1	1	1	0.00326797
1506	CTRL	CTRL	chymotrypsin like	HGNC:2524	16q22.1	hDG29I05	human	NM_001907	228.357	106.042	223.196	3.26004	-0.0457282	1.95984	185.865	2.70992	0.000174071	0.0139183	1	1	1	1	NA
5476	PPGB	CTSA	cathepsin A	HGNC:9251	20q13.12	hDG28D13	human	NM_000308	101.689	141.954	141.587	0.690177	0.725078	2.27197	128.41	1.10565	0.125526	0.317414	0	0	0	0	NA
1508	CTSB	CTSB	cathepsin B	HGNC:2527	8p23.1	hDG28E08	human	NM_001908	80.8586	110.063	32.5346	0.109801	0.0337245	-1.36318	74.4855	-0.40004	0.579377	0.549398	0	0	0	0	NA
1075	CTSC	CTSC	cathepsin C	HGNC:2528	11q14.2	hDG28G08	human	NM_001814	114.075	106.952	68.7433	1.03526	-0.0337245	-0.156198	96.5899	0.217165	0.763482	0.608452	0	0	0	0	0.00326797
1509	CTSD	CTSD	cathepsin D	HGNC:2529	11p15.5	hDG28I08	human	NM_001909	62.8431	132.62	103.248	-0.392146	0.52273	0.993986	99.5705	0.300389	0.677248	0.583473	0	0	0	0	NA
1510	CTSE	CTSE	cathepsin E	HGNC:2530	1q32.1	hDG28K08	human	NM_001910	84.2365	55.615	48.2961	0.203916	-1.14663	-0.837789	62.7158	-0.728673	0.312654	0.434565	0	0	0	0	0.00326797
8722	CTSF	CTSF	cathepsin F	HGNC:2531	11q13.2	hDG28M08	human	NM_003793	48.7685	71.9494	50	-0.784292	-0.792527	-0.780989	56.906	-0.890897	0.217036	0.378034	0	0	0	0	0.00653595
1511	CTSG	CTSG	cathepsin G	HGNC:2532	14q12	hDG28A10	human	NM_001911	62.2801	84.3947	69.1693	-0.407832	-0.52273	-0.141998	71.9481	-0.47089	0.514089	0.525365	0	0	0	0	0.00326797
1512	CTSH	CTSH	cathepsin H	HGNC:2535	15q25.1	hDG29K05	human	NM_148979	141.988	42.9947	110.685	1.03984	-1.07461	0	98.556	0.272062	0.706203	0.591804	0	0	0	0	NA
1513	CTSK	CTSK	cathepsin K	HGNC:2536	1q21	hDG29M05	human	NM_000396	78.5787	88.5289	81.4612	-0.590179	-0.331529	-0.50905	82.8563	-0.166308	0.817746	0.620668	0	0	0	0	NA
1514	CTSL	CTSL	cathepsin L	HGNC:2537	9q21.33	hDG28C10	human	NM_001912	81.4215	129.509	63.6315	0.125487	0.455281	-0.326596	91.5207	0.0756205	0.91655	0.643902	0	0	0	0	NA
392360	HCTSL-S	CTSL3P	cathepsin L family member 3, pseudogene	HGNC:33132	9q21.33	hDG28J14	human	NM_001023564	61.7171	162.178	141.161	-0.423517	1.1635	2.25777	121.685	0.917881	0.20346	0.371331	0	0	0	0	NA
1519	CTSO	CTSO	cathepsin O	HGNC:2542	4q32.1	hDG28G10	human	NM_001334	50.4574	132.62	121.14	-0.737234	0.52273	1.59038	101.406	0.351633	0.626104	0.566922	0	0	0	0	0.00326797
1520	CTSS	CTSS	cathepsin S	HGNC:2545	1q21	hDG28I10	human	NM_004079	73.5398	91.3952	98.1363	-0.094115	-0.37097	0.823589	87.6904	-0.0313283	0.965375	0.65467	0	0	0	0	0.00980392
1515	CTSL2	CTSV	cathepsin V	HGNC:2538	9q22.33	hDG28E10	human	NM_001333	48.7685	98.3957	102.396	-0.784292	-0.219209	0.965587	83.1868	-0.15708	0.827699	0.623573	0	0	0	0	NA
1521	CTSW	CTSW	cathepsin W	HGNC:2546	11q13.1	hDG28K10	human	NM_001335	39.1977	116.286	67.0394	-1.05095	0.168623	-0.212997	74.1743	-0.408727	0.571169	0.546359	0	0	0	0	0.00326797
1522	CTSZ	CTSZ	cathepsin Z	HGNC:2547	20q13.32	hDG28M10	human	NM_001336	58.9022	188.624	79.819	-0.501947	1.73681	0.212997	109.115	0.566895	0.432205	0.492301	0	0	0	0	NA
404093	CUEDC1	CUEDC1	CUE domain containing 1	HGNC:31350	17q23.2	hDG18M03	human	NM_017949	30.9113	16.3566	34.4485	-1.31394	-1.4979	-0.733142	27.2388	-1.71927	0.0172122	0.151146	-1	0	-1	0	0.00326797
79004	CUEDC2	CUEDC2	CUE domain containing 2	HGNC:28352	10q24.32	hDG18J04	human	NM_024040	65.1276	54.4353	32.6838	0.22775	0.429221	-0.821119	50.7489	-1.06282	0.140846	0.332322	0	0	0	0	0.00326797
8454	CUL1	CUL1	cullin 1	HGNC:2551	7q36.1	hDG20A05	human	NM_003592	100.37	88.1013	81.3822	-0.0843113	-0.291257	0.432882	89.9513	0.0317991	0.964855	0.65467	0	0	0	0	0.0196078
8453	CUL2	CUL2	cullin 2	HGNC:2552	10p11.2	hDG18F14	human	NM_003591	67.4605	51.3198	49.7426	0.332866	0.271548	0.0293257	56.1743	-0.911327	0.206677	0.372897	0	0	0	0	0.00326797
8452	CUL3	CUL3	cullin 3	HGNC:2553	2q36.2	hDG20O03	human	NM_003590	124.074	63.7975	50.5665	0.477764	-0.843113	-0.593955	79.4793	-0.2606	0.718034	0.596117	0	0	0	0	0.0294118
8451	CUL4A	CUL4A	cullin 4A	HGNC:2554	13q34	hDG20M03	human	NM_003589	99.1852	117.131	95.2795	-0.112415	0.367904	0.895965	103.865	0.420305	0.560302	0.543353	0	0	0	0	0.00653595
8450	CUL4B	CUL4B	cullin 4B	HGNC:2555	Xq23	hDG20K03	human	NM_003588	170.296	148.861	103.739	1.57381	1.08838	1.17784	140.965	1.45622	0.0436265	0.216575	1	0	1	0	0.0130719
8065	CUL5	CUL5	cullin 5	HGNC:2556	11q22.3	hDG18D14	human	NM_003478	34.4107	22.2415	37.9779	-1.15627	-1.20007	-0.557188	31.5434	-1.59908	0.0267167	0.179046	-1	0	-1	0	0.00653595
9820	CUL7	CUL7	cullin 7	HGNC:21024	6p21.1	hDG19I10	human	NM_014780	90.0355	148.752	73.2197	-0.235665	1.40727	-0.665616	104.002	0.424138	0.556745	0.542477	0	0	0	0	0.00980392
50624	CUZD1	CUZD1	CUB and zona pellucida like domains 1	HGNC:17937	10q26.13	hDG01C15	human	NM_022034	67.3324	85.8007	48.6392	-0.0931862	0.867202	-0.582324	67.2574	-0.601863	0.404304	0.476971	0	0	0	0	0.00653595
1524	CX3CR1	CX3CR1	C-X3-C motif chemokine receptor 1	HGNC:2558	3p21.3	hDG08P21	human	NM_001337	138.381	168.719	129.793	1.59748	2.14206	1.50266	145.631	1.58649	0.0279362	0.183576	1	0	1	1	NA
1525	CXADR	CXADR	coxsackie virus and adenovirus receptor	HGNC:2559	21q21.1	hDG05O06	human	NM_001338	90.961	55.0507	38.2502	-0.128474	-1.11332	-1.0278	61.4206	-0.764839	0.28925	0.420601	0	0	0	0	0.00653595
2919	CXCL1	CXCL1	C-X-C motif chemokine ligand 1	HGNC:4602	4q13.3	hDG09F22	human	NM_001511	89.3599	91.0795	91.5822	0.625615	1.05065	0.93974	90.6739	0.0519752	0.942586	0.648654	0	0	0	0	0.00326797
3627	CXCL10	CXCL10	C-X-C motif chemokine ligand 10	HGNC:10637	4q21	hDG09K09	human	NM_001565	79.2003	73.3965	82.2515	0.263931	0.324274	0.591127	78.2828	-0.294011	0.683717	0.585093	0	0	0	0	0.00653595
6373	CXCL11	CXCL11	C-X-C motif chemokine ligand 11	HGNC:10638	4q21	hDG09M09	human	NM_005409	36.3652	49.3981	55.071	-1.261	-0.66152	-0.424399	46.9448	-1.16904	0.10527	0.297439	0	0	0	0	NA
58191	CXCL16	CXCL16	C-X-C motif chemokine ligand 16	HGNC:16642	17p13	hDG09G11	human	NM_022059	17.4189	38.6619	41.6836	-1.9355	-1.10253	-0.924583	32.5881	-1.5699	0.0296143	0.184486	-1	0	-1	0	NA
3576	IL8	CXCL8	C-X-C motif chemokine ligand 8	HGNC:6025	4q13-q21	hDG09A11	human	NM_000584	92.1057	74.9753	104.564	0.723367	0.389129	1.42477	90.5483	0.0484698	0.946453	0.649353	0	0	0	0	NA
4283	CXCL9	CXCL9	C-X-C motif chemokine ligand 9	HGNC:7098	4q21	hDG09O09	human	NM_002416	38.0127	16.5581	42.4949	-1.20235	-2.0105	-0.894269	32.3552	-1.57641	0.0289462	0.184456	-1	0	-1	-1	0.00326797
3577	IL8RA	CXCR1	C-X-C motif chemokine receptor 1	HGNC:6026	2q35	hDG08P22	human	NM_000634	132.232	132.719	137.097	1.38448	1.07474	1.7588	134.016	1.26217	0.0803133	0.268727	0	0	0	0	0.00326797
3579	IL8RB	CXCR2	C-X-C motif chemokine receptor 2	HGNC:6027	2q35	hDG08P14	human	NM_001557	114.604	59.2188	123.463	0.773889	-1.10439	1.28068	99.0954	0.287122	0.690749	0.586672	0	0	0	0	0.00653595
2833	CXCR3	CXCR3	C-X-C motif chemokine receptor 3	HGNC:4540	Xq13	hDG08B22	human	NM_001504	155.598	106.219	99.1175	2.19387	0.289067	0.426893	120.311	0.879522	0.222972	0.380237	0	0	0	0	0.00326797
7852	CXCR4	CXCR4	C-X-C motif chemokine receptor 4	HGNC:2561	2q21	hDG08C15	human	NM_003467	62.9516	133.219	79.6409	-1.01529	1.08956	-0.256136	91.9371	0.0872471	0.903778	0.641264	0	0	0	0	0.00326797
643	BLR1	CXCR5	C-X-C motif chemokine receptor 5	HGNC:1060	11q23.3	hDG08F10	human	NM_001716	93.2872	102.219	114.699	0.0354995	0.170476	0.973316	103.402	0.40736	0.572443	0.546969	0	0	0	0	NA
10663	CXCR6	CXCR6	C-X-C motif chemokine receptor 6	HGNC:16647	3p21	hDG08E15	human	NM_006564	110.915	75.7188	44.5831	0.646091	-0.615195	-1.48559	77.0722	-0.327813	0.649669	0.574889	0	0	0	0	NA
30827	CXXC1	CXXC1	CXXC finger protein 1	HGNC:24343	18q12	hDG19C07	human	NM_014593	128.617	154.077	76.0157	0.869524	1.5405	-0.594617	119.57	0.858811	0.234066	0.385418	0	0	0	0	0.0196078
51706	CYB5R1	CYB5R1	cytochrome b5 reductase 1	HGNC:13397	1q32.1	hDG25K15	human	NM_016243	187.185	148.146	132.526	0.971514	1.09417	0.708215	155.952	1.87469	0.00939309	0.11311	1	0	1	0	0.00326797
51700	CYB5R2	CYB5R2	cytochrome b5 reductase 2	HGNC:24376	11p15.4	hDG25N04	human	NM_001001336	46.6807	112.767	90.3114	-1.61507	0.164876	-0.320383	83.2532	-0.155226	0.829702	0.623826	0	0	0	0	0.00326797
1727	CYB5R3	CYB5R3	cytochrome b5 reductase 3	HGNC:2873	22q13.2	hDG25M15	human	NM_000398	114.58	123.609	151.903	-0.365091	0.449661	1.18036	130.031	1.1509	0.110782	0.303278	0	0	0	0	0.00653595
51167	CYB5R4	CYB5R4	cytochrome b5 reductase 4	HGNC:20147	6q14.2	hDG25J15	human	NM_016230	178.445	95.0785	133.91	0.810627	-0.299774	0.74194	135.811	1.31231	0.0690244	0.253222	0	0	0	0	NA
1536	CYBB	CYBB	cytochrome b-245 beta chain	HGNC:2578	Xp21.1	hDG25L15	human	NM_000397	137.437	136.163	115.917	0.0556919	0.779412	0.303521	129.839	1.14555	0.11245	0.304543	0	0	0	0	0.00326797
50626	CYHR1	CYHR1	cysteine and histidine rich 1	HGNC:17806	8q24	hDG19J06	human	NM_032687	167.199	151.414	229.795	1.97471	1.47389	3.31033	182.803	2.62441	0.000277124	0.0171001	1	0	1	1	NA
1540	CYLD	CYLD	CYLD lysine 63 deubiquitinase	HGNC:2584	16q12.1	hDG18A06	human	NM_015247	124.228	97.3605	165.037	2.89067	2.60161	5.77716	128.875	1.11864	0.121151	0.311655	0	0	0	0	0.0294118
1583	CYP11A1	CYP11A1	cytochrome P450 family 11 subfamily A member 1	HGNC:2590	15q23-q24	hDG25O15	human	NM_000781	57.437	119.044	157.439	-1.41705	0.329751	1.31526	111.307	0.628094	0.384158	0.46872	0	0	0	0	0.00653595
1584	CYP11B1	CYP11B1	cytochrome P450 family 11 subfamily B member 1	HGNC:2591	8q21-q22	hDG25A17	human	NM_000497	125.336	148.716	75.7785	-0.167076	1.10916	-0.674491	116.61	0.776176	0.282169	0.415286	0	0	0	0	0.0130719
1585	CYP11B2	CYP11B2	cytochrome P450 family 11 subfamily B member 2	HGNC:2592	8q21-q22	hDG25C17	human	NM_000498	63.4874	72.8245	70.2422	-1.30567	-0.884332	-0.809389	68.8514	-0.557355	0.439939	0.495563	0	0	0	0	0.00980392
1586	CYP17A1	CYP17A1	cytochrome P450 family 17 subfamily A member 1	HGNC:2593	10q24.3	hDG25E17	human	NM_000102	160.966	121.327	73.0104	0.488851	0.389706	-0.74194	118.434	0.827112	0.251787	0.396358	0	0	0	0	NA
1588	CYP19A1	CYP19A1	cytochrome P450 family 19 subfamily A member 1	HGNC:2594	15q21	hDG25N15	human	NM_000103	184.496	136.733	111.765	0.92201	0.7944	0.202347	144.331	1.55021	0.0317249	0.190824	1	0	1	0	0.00326797
1543	CYP1A1	CYP1A1	cytochrome P450 family 1 subfamily A member 1	HGNC:2595	15q24.1	hDG25P15	human	NM_000499	97.7731	98.5021	86.8512	-0.674491	-0.209842	-0.404694	94.3755	0.155333	0.829582	0.623826	0	0	0	0	NA
1544	CYP1A2	CYP1A2	cytochrome P450 family 1 subfamily A member 2	HGNC:2596	15q24.1	hDG25G17	human	NM_000761	155.588	106.491	104.152	0.389843	0	0.0168623	122.077	0.928821	0.198104	0.367192	0	0	0	0	0.00980392
1545	CYP1B1	CYP1B1	cytochrome P450 family 1 subfamily B member 1	HGNC:2597	2p22.2	hDG25I17	human	NM_000104	191.891	145.292	117.301	1.05815	1.01923	0.337245	151.495	1.75023	0.0153103	0.142004	1	0	1	0	NA
57404	CYP20A1	CYP20A1	cytochrome P450 family 20 subfamily A member 1	HGNC:20576	2q33	hDG25K17	human	NM_020674	108.529	160.128	90.3114	-0.476475	1.40894	-0.320383	119.656	0.861231	0.232748	0.384414	0	0	0	0	0.00326797
1589	CYP21A2	CYP21A2	cytochrome P450 family 21 subfamily A member 2	HGNC:2600	6p21.3	hDG25M17	human	NM_000500	72.8992	95.6491	163.668	-1.1324	-0.284785	1.46702	110.739	0.612229	0.39628	0.473857	0	0	0	0	NA
1591	CYP24A1	CYP24A1	cytochrome P450 family 24 subfamily A member 1	HGNC:2602	20q13.2	hDG25O17	human	NM_000782	89.0336	76.8188	73.0104	-0.835378	-0.779412	-0.74194	79.6209	-0.256646	0.722124	0.59778	0	0	0	0	0.00326797
1592	CYP26A1	CYP26A1	cytochrome P450 family 26 subfamily A member 1	HGNC:2603	10q23-q24	hDG25A19	human	NM_057157	89.0336	73.3951	131.142	-0.835378	-0.869344	0.674491	97.8569	0.252541	0.726394	0.597984	0	0	0	0	0.00980392
56603	CYP26B1	CYP26B1	cytochrome P450 family 26 subfamily B member 1	HGNC:20581	2p12	hDG25C19	human	NM_019885	169.706	180.67	75.7785	0.649739	1.94853	-0.674491	142.052	1.48655	0.0394386	0.206681	1	0	1	0	0.00980392
340665	CYP26C1	CYP26C1	cytochrome P450 family 26 subfamily C member 1	HGNC:20577	10q23.33	hDG25B17	human	NM_183374	79.6218	123.039	111.765	-1.00864	0.434672	0.202347	104.808	0.446641	0.535996	0.532621	0	0	0	0	NA
1593	CYP27A1	CYP27A1	cytochrome P450 family 27 subfamily A member 1	HGNC:2605	2q35	hDG25D17	human	NM_000784	160.294	146.434	108.997	0.476475	1.04921	0.134898	138.575	1.38947	0.0542031	0.231038	0	0	0	0	0.00653595
1594	CYP27B1	CYP27B1	cytochrome P450 family 27 subfamily B member 1	HGNC:2606	12q14.1	hDG25E19	human	NM_000785	95.7563	103.638	126.99	-0.711619	-0.0749434	0.573317	108.795	0.557944	0.43946	0.495483	0	0	0	0	0.00326797
339761	FLJ16008	CYP27C1	cytochrome P450 family 27 subfamily C member 1	HGNC:33480	2q14.3	hDG25L22	human	NM_001001665	136.092	125.892	50.8651	0.0309399	0.509615	-1.28153	104.283	0.431973	0.549486	0.539886	0	0	0	0	0.00653595
1553	CYP2A13	CYP2A13	cytochrome P450 family 2 subfamily A member 13	HGNC:2608	19q13.2	hDG25G19	human	NM_000766	114.58	133.88	171.28	-0.365091	0.719457	1.6525	139.913	1.42685	0.0480429	0.221692	1	0	1	0	0.00653595
1548	CYP2A6	CYP2A6	cytochrome P450 family 2 subfamily A member 6	HGNC:2610	19q13.2	hDG25I19	human	NM_000762	275.252	193.224	142.215	2.59277	2.27828	0.944287	203.564	3.2041	9.06932e-06	0.00175247	1	1	1	1	NA
1549	CYP2A7	CYP2A7	cytochrome P450 family 2 subfamily A member 7	HGNC:2611	19q13.2	hDG25M19	human	NM_000764	210.042	85.378	113.149	1.3923	-0.554581	0.236072	136.19	1.32287	0.0668347	0.249734	0	0	0	0	0.00653595
1555	CYP2B6	CYP2B6	cytochrome P450 family 2 subfamily B member 6	HGNC:2615	19q13.2	hDG25O19	human	NM_000767	84.3277	164.693	108.304	-0.92201	1.52885	0.118036	119.109	0.845932	0.241156	0.389405	0	0	0	0	0.00980392
1562	CYP2C18	CYP2C18	cytochrome P450 family 2 subfamily C member 18	HGNC:2620	10q24	hDG25A21	human	NM_000772	71.5546	111.626	174.74	-1.15715	0.134898	1.73681	119.307	0.851478	0.238097	0.387608	0	0	0	0	0.00326797
1557	CYP2C19	CYP2C19	cytochrome P450 family 2 subfamily C member 19	HGNC:2621	10q24	hDG25C21	human	NM_000769	101.134	90.5136	104.152	-0.612611	-0.419683	0.0168623	98.6001	0.273293	0.70492	0.591263	0	0	0	0	0.00980392
1558	CYP2C8	CYP2C8	cytochrome P450 family 2 subfamily C member 8	HGNC:2622	10q24.1	hDG25F17	human	NM_030878	196.597	143.01	180.969	1.14478	0.959276	1.88857	173.525	2.36536	0.00104882	0.0389114	1	0	1	0	0.00980392
1559	CYP2C9	CYP2C9	cytochrome P450 family 2 subfamily C member 9	HGNC:2623	10q24.1	hDG25H17	human	NM_000771	121.975	148.146	118.685	-0.228956	1.09417	0.37097	129.602	1.13893	0.114542	0.305811	0	0	0	0	0.0163399
1565	CYP2D6	CYP2D6	cytochrome P450 family 2 subfamily D member 6	HGNC:2625	22q13.1	hDG25E21	human	NM_000106	114.58	87.0899	50.8651	-0.365091	-0.509615	-1.28153	84.1783	-0.129396	0.857707	0.629375	0	0	0	0	0.00326797
1571	CYP2E1	CYP2E1	cytochrome P450 family 2 subfamily E member 1	HGNC:2631	10q26.3	hDG25G21	human	NM_000773	73.5714	38.0171	79.9308	-1.12003	-1.79864	-0.573317	63.8398	-0.69729	0.333954	0.444652	0	0	0	0	0.0163399
1572	CYP2F1	CYP2F1	cytochrome P450 family 2 subfamily F member 1	HGNC:2632	19q13.1-q13.2	hDG25I21	human	NM_000774	202.647	169.829	136.678	1.25616	1.66374	0.809389	169.718	2.25906	0.0017491	0.0488645	1	0	1	0	0.00653595
1573	CYP2J2	CYP2J2	cytochrome P450 family 2 subfamily J member 2	HGNC:2634	1p31.3-p31.2	hDG25K21	human	NM_000775	291.387	172.682	86.8512	2.88979	1.73869	-0.404694	183.64	2.64779	0.000245025	0.016233	1	0	1	1	0.0130719
120227	CYP2R1	CYP2R1	cytochrome P450 family 2 subfamily R member 1	HGNC:20580	11p15.2	hDG25M21	human	NM_024514	93.0672	76.8188	77.8547	-0.761123	-0.779412	-0.623904	82.5802	-0.174016	0.809458	0.619148	0	0	0	0	0.0163399
29785	CYP2S1	CYP2S1	cytochrome P450 family 2 subfamily S member 1	HGNC:15654	19q13.2	hDG25O21	human	NM_030622	92.395	110.485	73.7024	-0.773499	0.104921	-0.725078	92.1941	0.0944247	0.895903	0.639788	0	0	0	0	0.00326797
113612	CYP2U1	CYP2U1	cytochrome P450 family 2 subfamily U member 1	HGNC:20582	4q25	hDG25C04	human	NM_183075	129.37	86.5193	93.7716	-0.0928198	-0.524604	-0.236072	103.22	0.402297	0.577231	0.548674	0	0	0	0	0.00326797
54905	CYP2W1	CYP2W1	cytochrome P450 family 2 subfamily W member 1	HGNC:20243	7p22.3	hDG25J17	human	NM_017781	140.126	217.19	97.9239	0.105196	2.9078	-0.134898	151.747	1.75726	0.0149097	0.141781	1	0	1	1	0.00653595
51302	CYP39A1	CYP39A1	cytochrome P450 family 39 subfamily A member 1	HGNC:17449	6p12.3	hDG25L17	human	NM_016593	184.496	121.327	110.381	0.92201	0.389706	0.168623	138.734	1.39393	0.0534407	0.230113	0	0	0	0	NA
1576	CYP3A4	CYP3A4	cytochrome P450 family 3 subfamily A member 4	HGNC:2637	7q21.1	hDG25E04	human	NM_017460	138.109	123.609	70.9343	0.0680679	0.449661	-0.792527	110.884	0.616292	0.393141	0.472131	0	0	0	0	0.00980392
64816	CYP3A43	CYP3A43	cytochrome P450 family 3 subfamily A member 43	HGNC:17450	7q21.1	hDG25G04	human	NM_022820	265.84	192.653	104.152	2.4195	2.26329	0.0168623	187.549	2.75693	0.000134056	0.0125485	1	1	1	1	0.00326797
1577	CYP3A5	CYP3A5	cytochrome P450 family 3 subfamily A member 5	HGNC:2638	7q21.1	hDG25L08	human	NM_000777	177.101	72.8245	46.7128	0.785875	-0.884332	-1.38271	98.8794	0.281092	0.696943	0.588673	0	0	0	0	0.00326797
1551	CYP3A7	CYP3A7	cytochrome P450 family 3 subfamily A member 7	HGNC:2640	7q22.1	hDG25I04	human	NM_000765	117.269	214.907	95.1557	-0.315587	2.84785	-0.202347	142.444	1.49751	0.0380124	0.203092	1	0	1	1	0.00326797
10858	CYP46A1	CYP46A1	cytochrome P450 family 46 subfamily A member 1	HGNC:2641	14q32.2	hDG25K04	human	NM_006668	94.4118	116.191	133.91	-0.736371	0.254808	0.74194	114.838	0.726681	0.31398	0.435044	0	0	0	0	0.0130719
1579	CYP4A11	CYP4A11	cytochrome P450 family 4 subfamily A member 11	HGNC:2642	1p33	hDG25M04	human	NM_000778	167.017	62.5535	67.474	0.600235	-1.15413	-0.876838	99.0148	0.284872	0.693064	0.587375	0	0	0	0	0.0261438
284541	CYP4A22	CYP4A22	cytochrome P450 family 4 subfamily A member 22	HGNC:20575	1p33	hDG25O04	human	NM_001010969	87.6891	73.9658	117.301	-0.86013	-0.854355	0.337245	92.9853	0.116516	0.87174	0.634452	0	0	0	0	0.0130719
1580	CYP4B1	CYP4B1	cytochrome P450 family 4 subfamily B member 1	HGNC:2644	1p33	hDG25A06	human	NM_000779	78.9496	128.745	128.374	-1.02102	0.584559	0.607042	112.023	0.64808	0.369192	0.462136	0	0	0	0	0.00653595
57834	CYP4F11	CYP4F11	cytochrome P450 family 4 subfamily F member 11	HGNC:13265	19p13.1	hDG25N17	human	NM_021187	151.555	95.6491	130.45	0.315587	-0.284785	0.657628	125.885	1.03513	0.151494	0.338747	0	0	0	0	NA
66002	CYP4F12	CYP4F12	cytochrome P450 family 4 subfamily F member 12	HGNC:18857	19p13.1	hDG25P17	human	NM_023944	134.076	111.626	142.907	-0.00618799	0.134898	0.961149	129.536	1.13709	0.115127	0.305962	0	0	0	0	0.00980392
8529	CYP4F2	CYP4F2	cytochrome P450 family 4 subfamily F member 2	HGNC:2645	19p13.12	hDG25C06	human	NM_001082	153.571	93.3666	93.7716	0.352715	-0.34474	-0.236072	113.57	0.691282	0.338144	0.44664	0	0	0	0	0.00980392
126410	FLJ39501	CYP4F22	cytochrome P450 family 4 subfamily F member 22	HGNC:26820	19p13.12	hDG25D22	human	NM_173483	171.723	87.6605	55.0173	0.686867	-0.494627	-1.18036	104.8	0.446412	0.536235	0.532621	0	0	0	0	0.00653595
4051	CYP4F3	CYP4F3	cytochrome P450 family 4 subfamily F member 3	HGNC:2646	19p13.12	hDG25E06	human	NM_000896	107.185	89.9429	123.529	-0.501227	-0.434672	0.489006	106.886	0.504646	0.484392	0.513516	0	0	0	0	0.00326797
11283	CYP4F8	CYP4F8	cytochrome P450 family 4 subfamily F member 8	HGNC:2648	19p13.12	hDG25G06	human	NM_007253	201.975	133.31	153.287	1.24379	0.704468	1.21408	162.857	2.06749	0.00417723	0.0781131	1	0	1	0	NA
285440	CYP4V2	CYP4V2	cytochrome P450 family 4 subfamily V member 2	HGNC:23198	4q35.2	hDG25I06	human	NM_207352	143.487	120.185	81.3149	0.167076	0.359728	-0.539593	114.996	0.7311	0.311053	0.434268	0	0	0	0	NA
260293	CYP4X1	CYP4X1	cytochrome P450 family 4 subfamily X member 1	HGNC:20244	1p33	hDG25K06	human	NM_178033	142.815	83.6662	68.1661	0.1547	-0.599547	-0.859976	98.2158	0.262563	0.716002	0.594963	0	0	0	0	0.00980392
199974	CYP4Z1	CYP4Z1	cytochrome P450 family 4 subfamily Z member 1	HGNC:20583	1p33	hDG25M06	human	NM_178134	94.4118	87.6605	83.391	-0.736371	-0.494627	-0.489006	88.4878	-0.00906555	0.989977	0.662861	0	0	0	0	0.00653595
1595	CYP51A1	CYP51A1	cytochrome P450 family 51 subfamily A member 1	HGNC:2649	7q21.2	hDG25O06	human	NM_000786	115.252	101.355	88.2353	-0.352715	-0.134898	-0.37097	101.614	0.357453	0.620386	0.564251	0	0	0	0	0.00326797
1581	CYP7A1	CYP7A1	cytochrome P450 family 7 subfamily A member 1	HGNC:2651	8q11-q12	hDG25A08	human	NM_000780	92.395	122.468	96.5398	-0.773499	0.419683	-0.168623	103.801	0.41851	0.561979	0.543353	0	0	0	0	0.00653595
9420	CYP7B1	CYP7B1	cytochrome P450 family 7 subfamily B member 1	HGNC:2652	8q21.3	hDG25C08	human	NM_004820	132.059	85.378	91.6955	-0.0433159	-0.554581	-0.286659	103.044	0.39738	0.581894	0.550453	0	0	0	0	0.00980392
1582	CYP8B1	CYP8B1	cytochrome P450 family 8 subfamily B member 1	HGNC:2653	3p22.1	hDG25B19	human	NM_004391	110.546	153.281	59.8616	-0.439347	1.22907	-1.06232	107.896	0.532863	0.46032	0.504312	0	0	0	0	0.00980392
10800	CYSLTR1	CYSLTR1	cysteinyl leukotriene receptor 1	HGNC:17451	Xq13-q21	hDG08G15	human	NM_006639	98.2065	114.719	127.845	0.205897	0.541075	1.43436	113.59	0.69185	0.337736	0.446483	0	0	0	0	0.00326797
57105	CYSLTR2	CYSLTR2	cysteinyl leukotriene receptor 2	HGNC:18274	13q14.2	hDG08I15	human	NM_020377	100.256	110.719	62.112	0.276896	0.422483	-0.870861	91.029	0.0618912	0.931658	0.646834	0	0	0	0	0.00653595
1601	DAB2	DAB2	DAB2, clathrin adaptor protein	HGNC:2662	5p13.1	hDG09J22	human	NM_001343	130.822	70.8703	112.677	2.10167	0.220507	1.72791	104.79	0.446127	0.536469	0.53274	0	0	0	0	0.0163399
153090	DAB2IP	DAB2IP	DAB2 interacting protein	HGNC:17294	9q33.1-q33.3	hDG09O22	human	NM_032552	69.3153	97.7107	72.1095	-0.0879771	1.32304	0.212199	79.7118	-0.254108	0.72476	0.59778	0	0	0	0	0.0130719
1603	DAD1	DAD1	defender against cell death 1	HGNC:2664	14q11.2	hDG31O11	human	NM_001344	56.6886	36.8621	79.1496	-0.743533	-0.983632	-0.330268	57.5668	-0.872446	0.226711	0.38177	0	0	0	0	NA
1605	DAG1	DAG1	dystroglycan 1	HGNC:2666	3p21	hDG05I05	human	NM_004393	78.7821	100.35	44.82	-0.513898	0.20316	-0.819024	74.6505	-0.395431	0.583749	0.550907	0	0	0	0	0.00326797
747	C11ORF11	DAGLA	diacylglycerol lipase alpha	HGNC:1165	11q12.3	hDG01G13	human	NM_006133	54.34	73.0159	79.2888	-0.749927	0.218991	1.11019	68.8815	-0.556514	0.440632	0.495862	0	0	0	0	0.0130719
1610	DAO	DAO	D-amino acid oxidase	HGNC:2671	12q24.11	hDG25D19	human	NM_001917	158.277	60.271	149.135	0.439347	-1.21408	1.11291	122.561	0.942336	0.191677	0.364142	0	0	0	0	NA
1612	DAPK1	DAPK1	death associated protein kinase 1	HGNC:2674	9q34.1	K01F17	human	NM_004938	186.103	188.019	144.193	1.83347	2.52666	0.861849	172.772	2.34433	0.00116233	0.0408911	1	0	1	1	0.0163399
23604	DAPK2	DAPK2	death associated protein kinase 2	HGNC:2675	15q22.1	K02N22	human	NM_014326	34.3208	50.2833	36.9472	-1.12415	-1.06794	-1.00621	40.5171	-1.34851	0.0616943	0.239077	0	0	0	0	NA
1613	DAPK3	DAPK3	death associated protein kinase 3	HGNC:2676	19p13.3	K03C13	human	NM_001348	91.5414	132.008	96.5821	-0.065804	0.527862	0.0740295	106.711	0.499754	0.48864	0.51502	0	0	0	0	0.00980392
27071	DAPP1	DAPP1	dual adaptor of phosphotyrosine and 3-phosphoinositides 1	HGNC:16500	4q23	hDG27K21	human	NM_014395	113.468	135.275	70.3964	0.951205	0.317407	-0.711449	106.38	0.490518	0.496715	0.5173	0	0	0	0	NA
1618	DAZL	DAZL	deleted in azoospermia like	HGNC:2685	3p24	hDG23G04	human	NM_001351	142.606	107.596	137.565	0.558669	-0.317407	0.674491	129.256	1.12926	0.117652	0.307842	0	0	0	0	NA
10926	DBF4	DBF4	DBF4 zinc finger	HGNC:17364	7q21.3	hDG30M15	human	NM_006716	43.6942	87.3114	77.1866	-0.800958	-0.218218	-0.536134	69.3974	-0.54211	0.452555	0.499878	0	0	0	0	NA
1621	DBH	DBH	dopamine beta-hydroxylase	HGNC:2689	9q34	hDG25N08	human	NM_000787	91.7227	84.2368	40.4844	-0.785875	-0.584559	-1.53447	72.148	-0.465307	0.519096	0.527974	0	0	0	0	0.00980392
1629	DBT	DBT	dihydrolipoamide branched chain transacylase E2	HGNC:2698	1p31	hDG31E22	human	NM_001918	103.699	93.5263	54.7288	0.159329	-0.112415	-0.851254	83.9846	-0.134804	0.851826	0.62793	0	0	0	0	0.0163399
285761	DCBLD1	DCBLD1	discoidin, CUB and LCCL domain containing 1	HGNC:21479	6q22.31	hDG01E15	human	NM_173674	75.4088	45.7186	48.4874	0.315058	-1.16503	-0.590703	56.5383	-0.901164	0.211786	0.375557	0	0	0	0	NA
131566	DCBLD2	DCBLD2	discoidin, CUB and LCCL domain containing 2	HGNC:24627	3q12.2	hDG01G15	human	NM_080927	94.7218	81.4815	67.1503	1.29129	0.648212	0.439885	81.1179	-0.214849	0.765929	0.608536	0	0	0	0	0.00653595
1630	DCC	DCC	DCC netrin 1 receptor	HGNC:2701	18q21.1	hDG05M21	human	NM_005215	72.1852	108.738	117.088	-0.722669	0.446952	1.47746	99.3371	0.293871	0.683863	0.585093	0	0	0	0	0.0457516
8642	DCHS1	DCHS1	dachsous cadherin-related 1	HGNC:13681	11p15.4	hDG02L05	human	NM_003737	25.538	17.3628	28.3683	-1.26023	-1.50258	-1.05084	23.7564	-1.81651	0.0118407	0.128268	-1	0	-1	0	0.0294118
54798	DCHS2	DCHS2	dachsous cadherin-related 2	HGNC:23111	4q32.1	hDG02N05	human	NM_199348	42.5251	118.828	37.9491	-0.603492	2.37073	-0.659828	66.434	-0.624853	0.386611	0.469698	0	0	0	0	0.0718954
1633	DCK	DCK	deoxycytidine kinase	HGNC:2704	4q13.3-q21.1	K01K06	human	NM_000788	161.522	112.271	167.002	1.20648	0.428248	1.43329	146.932	1.62281	0.0245463	0.172323	1	0	1	0	0.00653595
1633	DCK	DCK	deoxycytidine kinase	HGNC:2704	4q13.3-q21.1	DDRD12	human	NM_000788	132.22	124.021	99.528	0.286148	0.449661	-0.174062	118.59	0.831449	0.249291	0.395156	0	0	0	0	0.00653595
9201	DCAMKL1	DCLK1	doublecortin like kinase 1	HGNC:2700	13q13.3	K01F15	human	NM_004734	205.843	126.57	116.896	2.33697	0.824378	0.177991	149.77	1.70206	0.0183651	0.152669	1	0	1	1	0.0163399
166614	DCAMKL2	DCLK2	doublecortin like kinase 2	HGNC:19002	4q31.3	K03K06	human	NM_152619	45.4261	51.1456	53.3627	-0.82255	-0.938422	-0.732069	49.9781	-1.08434	0.132974	0.324736	0	0	0	0	0.00653595
85443	DCAMKL3	DCLK3	doublecortin like kinase 3	HGNC:19005	3p22.3	K02O18	human	XM_047355	58.5983	106.941	68.9016	-0.337245	0.337245	-0.0774006	78.1468	-0.297808	0.679862	0.584301	0	0	0	0	0.00980392
9937	DCLRE1A	DCLRE1A	DNA cross-link repair 1A	HGNC:17660	10q25.1	DDRP10	human	NM_014881	100.549	128.418	127.472	-0.279335	0.541117	0.469968	118.813	0.837676	0.245763	0.392605	0	0	0	0	0.00326797
9937	DCLRE1A	DCLRE1A	DNA cross-link repair 1A	HGNC:17660	10q25.1	hDG23G20	human	NM_014881	200.565	77.7552	88.4548	2.04391	-1.0448	-0.601965	122.258	0.933882	0.195711	0.365638	0	0	0	0	0.00326797
64858	DCLRE1B	DCLRE1B	DNA cross-link repair 1B	HGNC:17641	1p11.1	hDG23I20	human	NM_022836	134.629	139.607	73.3868	0.354278	0.462886	-0.993605	115.874	0.755626	0.295105	0.423741	0	0	0	0	0.00326797
64858	DCLRE1B	DCLRE1B	DNA cross-link repair 1B	HGNC:17641	1p11.1	DDRB14	human	NM_022836	124.97	101.672	138.046	0.1567	-0.0152427	0.713655	121.563	0.914454	0.205126	0.372025	0	0	0	0	0.00326797
64421	DCLRE1C	DCLRE1C	DNA cross-link repair 1C	HGNC:17642	10p13	hDG23M20	human	NM_022487	122.931	143.405	138.682	0.0545043	0.555463	0.703501	135.006	1.28982	0.0739104	0.259245	0	0	0	0	0.00326797
64421	DCLRE1C	DCLRE1C	DNA cross-link repair 1C	HGNC:17642	10p13	DDRN21	human	NM_001033855 NM_001033857 NM_001033858 NM_022487	122.681	88.8482	80.2691	0.115822	-0.28199	-0.617921	97.266	0.236041	0.743617	0.602999	0	0	0	0	0.00326797
1634	DCN	DCN	decorin	HGNC:2705	12q21.33	hDG05B11	human	NM_001920	147.288	62.3209	86.7656	1.65411	-0.90203	0.513898	98.7916	0.27864	0.699437	0.589329	0	0	0	0	0.00653595
149095	DCST1	DCST1	DC-STAMP domain containing 1	HGNC:26539	1q22	hDG20I19	human	NM_152494	111.63	109.705	74.7356	0.182675	0.199281	0.211408	98.69	0.275803	0.702341	0.590488	0	0	0	0	0.00326797
1639	DCTN1	DCTN1	dynactin subunit 1	HGNC:2711	2p13	hDG02A07	human	NM_004082	111.392	67.7455	63.8174	2.05897	0.420722	0.395897	80.9848	-0.218563	0.762006	0.608452	0	0	0	0	0.00980392
10540	DCTN2	DCTN2	dynactin subunit 2	HGNC:2712	12q13.3	hDG03O04	human	NM_006400	29.7025	41.8659	59.2258	-1.10542	-0.758802	0.0827206	43.5981	-1.26248	0.0802408	0.268679	0	0	0	0	NA
1641	DCX	DCX	doublecortin	HGNC:2714	Xq22.3-q23	hDG03A06	human	NM_178152	59.2135	59.3687	49.5989	0.218585	0.149166	-0.299067	56.0603	-0.914509	0.205095	0.372025	0	0	0	0	0.00653595
51181	DCXR	DCXR	dicarbonyl and L-xylulose reductase	HGNC:18985	17q25.3	hDG25E08	human	NM_016286	173.067	43.7233	66.09	0.711619	-1.64876	-0.910563	94.2935	0.153043	0.832076	0.623826	0	0	0	0	NA
1642	DDB1	DDB1	damage specific DNA binding protein 1	HGNC:2717	11q12.2	hDG23I04	human	NM_001923	157.494	194.405	87.3387	0.940199	1.79864	-0.630975	146.413	1.60832	0.0258614	0.175855	1	0	1	0	0.0163399
1642	DDB1	DDB1	damage specific DNA binding protein 1	HGNC:2717	11q12.2	DDRP19	human	NM_001923	78.4164	73.0937	60.2549	-0.674491	-0.609709	-1.07919	70.5883	-0.508856	0.480752	0.511589	0	0	0	0	0.0163399
1643	DDB2	DDB2	damage specific DNA binding protein 2	HGNC:2718	11p11.2	DDRJ09	human	NM_000107	218.459	169.453	170.144	1.82589	1.39471	1.45342	186.019	2.71421	0.000169746	0.0138106	1	1	1	0	0.00653595
1644	DDC	DDC	dopa decarboxylase	HGNC:2719	7p12.1	hDG22E10	human	NM_000790	83.4353	279.148	100.571	-0.548024	1.7344	0.550242	154.385	1.83092	0.011209	0.125354	1	0	1	0	0.0228758
414301	DDI1	DDI1	DNA damage inducible 1 homolog 1	HGNC:18961	11q22.3	hDG19P05	human	NM_001001711	27.6241	62.8952	161.992	-2.02347	-0.741107	1.5886	84.1705	-0.129613	0.857484	0.629375	0	0	0	0	0.0130719
84301	DDI2	DDI2	DNA damage inducible 1 homolog 2	HGNC:24578	1p36.13	hDG19P21	human	NM_032341	96.2766	106.156	59.2398	-0.0568848	0.341409	-1.02061	87.2243	-0.0443444	0.951005	0.65049	0	0	0	0	0.00326797
780	DDR1	DDR1	discoidin domain receptor tyrosine kinase 1	HGNC:2730	6p21.33	K02L06	human	NM_001954	49.3497	52.5496	40.7513	-0.637019	-1.01174	-0.895635	47.5502	-1.15213	0.110399	0.302766	0	0	0	0	0.0196078
4921	DDR2	DDR2	discoidin domain receptor tyrosine kinase 2	HGNC:2731	1q12-q23	K01J10	human	NM_006182	97.8352	83.6715	115.775	-0.417994	-0.364011	0.149887	99.0938	0.287078	0.690787	0.586672	0	0	0	0	0.0196078
1652	DDT	DDT	D-dopachrome tautomerase	HGNC:2732	22q11.23	hDG22J03	human	NM_001355	87.7332	173.916	105.32	-0.396263	0.321186	0.780989	122.323	0.935694	0.194818	0.365638	0	0	0	0	NA
1653	DDX1	DDX1	DEAD/H-box helicase 1	HGNC:2734	2p24	DDRK03	human	NM_004939	167.708	84.4516	91.9755	0.91976	-0.373447	-0.348124	114.712	0.723164	0.316347	0.436079	0	0	0	0	0.00980392
1663	DDX11	DDX11	DEAD/H-box helicase 11	HGNC:2736	12p11.21	hDG23K04	human	NM_030655	79.8604	122.787	71.1545	-1.04921	0.0529012	-1.05163	91.2674	0.0685494	0.924328	0.645644	0	0	0	0	0.0228758
440081	DDX12	DDX12P	DEAD/H-box helicase 12, pseudogene	HGNC:2737	12p13.31	hDG23N04	human	BC035635	251.08	203.086	198.396	3.33839	2.01025	2.25556	217.52	3.59381	6.41794e-07	0.000198423	1	1	1	1	NA
10521	DDX17	DDX17	DEAD-box helicase 17	HGNC:2740	22q13.1	DDRG21	human	NM_001098504 NM_001098505 NM_006386 NM_030881	124.207	161.026	187.137	0.143074	1.21942	1.84506	157.457	1.9167	0.00791699	0.106625	1	0	1	0	NA
9188	DDX21	DDX21	DEAD-box helicase 21	HGNC:2744	10q21	DDRL15	human	NM_004728	140.234	154.431	116.899	0.429221	1.08223	0.226281	137.188	1.35075	0.061266	0.238478	0	0	0	0	0.00980392
1654	DDX3X	DDX3X	DEAD-box helicase 3, X-linked	HGNC:2745	Xp11.3-p11.23	DDRK09	human	NM_001193416 NM_001193417 NM_001356	177.629	129.883	87.8216	1.0969	0.571602	-0.443858	131.778	1.19969	0.0964678	0.286389	0	0	0	0	0.00980392
9879	DDX46	DDX46	DEAD-box helicase 46	HGNC:18681	5q31.1	hDG23P04	human	NM_014829	114.955	79.9254	158.772	-0.149887	-0.991898	1.22569	117.884	0.811748	0.260698	0.400821	0	0	0	0	0.00980392
1655	DDX5	DDX5	DEAD-box helicase 5	HGNC:2746	17q21	DDRN19	human	NM_004396	120.391	63.9341	87.0663	0.0749434	-0.800243	-0.461265	90.4638	0.0461109	0.949056	0.650082	0	0	0	0	NA
11056	DDX52	DDX52	DEAD-box helicase 52	HGNC:20038	17q12	hDG23N16	human	NM_007010	176.105	70.1594	125.288	1.41711	-1.22995	0.355377	123.851	0.978345	0.17525	0.352746	0	0	0	0	0.0130719
1666	DECR1	DECR1	2,4-dienoyl-CoA reductase 1, mitochondrial	HGNC:2753	8q21.3	hDG25G08	human	NM_001359	187.185	144.722	84.083	0.971514	1.00424	-0.472144	138.663	1.39194	0.0537878	0.230752	0	0	0	0	NA
26063	DECR2	DECR2	2,4-dienoyl-CoA reductase 2, peroxisomal	HGNC:2754	16p13.3	hDG25I08	human	NM_020664	162.983	104.208	80.6228	0.525979	-0.0599547	-0.556455	115.938	0.757408	0.293973	0.422732	0	0	0	0	0.00326797
54849	FLJ20186	DEF8	differentially expressed in FDCP 8 homolog	HGNC:25969	16q24.3	hDG20D21	human	NM_207514	105.704	61.7722	13.1042	0.0421557	-0.889101	-1.84227	60.1934	-0.799106	0.268203	0.406205	0	0	0	0	0.00326797
1674	DES	DES	desmin	HGNC:2770	2q35	hDG02C07	human	NM_001927	64.5624	57.2491	51.8413	0.248497	0.0200344	-0.0928647	57.8843	-0.863581	0.231462	0.384099	0	0	0	0	0.00326797
1606	DGKA	DGKA	diacylglycerol kinase alpha	HGNC:2849	12q13.3	K01C14	human	NM_001345	148.115	82.1256	147.184	0.864488	-0.406836	0.936793	125.808	1.033	0.152347	0.339576	0	0	0	0	0.00653595
1607	DGKB	DGKB	diacylglycerol kinase beta	HGNC:2850	7p21.2	K01H07	human	NM_004080	131.727	171.401	61.1825	0.446494	2.0663	-1.21783	121.437	0.910946	0.206899	0.372897	0	0	0	0	0.0196078
8527	DGKD	DGKD	diacylglycerol kinase delta	HGNC:2851	2q37	K01B22	human	NM_152879	152.584	74.7826	79.5046	0.978487	-0.610254	-0.758802	102.29	0.376332	0.60206	0.557189	0	0	0	0	0.0130719
8526	DGKE	DGKE	diacylglycerol kinase epsilon	HGNC:2852	17q22	K01K22	human	NM_003647	112.36	95.6522	113.157	-0.0474993	-0.0321186	0.0843113	107.057	0.509417	0.480269	0.511428	0	0	0	0	0.00653595
1608	DGKG	DGKG	diacylglycerol kinase gamma	HGNC:2853	3q27-q28	K01E14	human	NM_001346	89.2691	47.343	73.8958	-0.636491	-1.37039	-0.899321	70.1693	-0.520557	0.470726	0.507565	0	0	0	0	NA
160851	DGKH	DGKH	diacylglycerol kinase eta	HGNC:2854	13q13.3	K01D22	human	NM_152910	120.554	44.6377	71.6523	0.161498	-1.44534	-0.955529	78.948	-0.275437	0.702724	0.590549	0	0	0	0	0.0130719
9162	DGKI	DGKI	diacylglycerol kinase iota	HGNC:2855	7q32.3-q33	K02N10	human	NM_004717	63.2225	29.8867	18.6876	-0.187359	-1.57381	-1.53695	37.2656	-1.4393	0.0461249	0.218494	-1	0	-1	0	0.0261438
1609	DGKQ	DGKQ	diacylglycerol kinase theta	HGNC:2856	4p16.3	K01G14	human	NM_001347	115.34	88.6957	123.253	0.0284996	-0.22483	0.337245	109.096	0.566367	0.432585	0.492301	0	0	0	0	0.0130719
8525	DGKZ	DGKZ	diacylglycerol kinase zeta	HGNC:2857	11p11.2	K02I07	human	NM_201532	58.5983	120.538	132.049	-0.337245	0.674491	1.7581	103.729	0.416493	0.563877	0.544225	0	0	0	0	0.00980392
1716	DGUOK	DGUOK	deoxyguanosine kinase	HGNC:2858	2p13	K01K18	human	NM_001929	75.1164	42.3188	82.4959	-0.997486	-1.50957	-0.683859	66.6437	-0.618998	0.391058	0.471737	0	0	0	0	NA
1717	DHCR7	DHCR7	7-dehydrocholesterol reductase	HGNC:2860	11q13.4	hDG25K08	human	NM_001360	144.832	73.3951	95.1557	0.191828	-0.869344	-0.202347	104.461	0.43694	0.544896	0.53754	0	0	0	0	0.00326797
1719	DHFR	DHFR	dihydrofolate reductase	HGNC:2861	5q14.1	DDRB07	human	NM_000791	63.5345	41.951	54.2129	-0.940199	-1.25753	-1.21843	53.2328	-0.993461	0.168649	0.347671	0	0	0	0	0.00980392
1719	DHFR	DHFR	dihydrofolate reductase	HGNC:2861	5q14.1	hDG23F17	human	NM_000791	202.16	84.2659	107.987	2.08479	-0.886096	-0.0942837	131.471	1.19112	0.0988859	0.290055	0	0	0	0	0.00980392
200895	DHFRL1	DHFR2	dihydrofolate reductase 2	HGNC:27309	3q11.2	hDG23H17	human	NM_176815	139.415	127.67	109.104	0.476913	0.171929	-0.0652733	125.396	1.0215	0.156949	0.341397	0	0	0	0	NA
50846	DHH	DHH	desert hedgehog	HGNC:2865	12q13.1	hDG09I04	human	NM_021044	26.7548	48.7665	66.0243	-1.60314	-0.687462	-0.0151571	47.1819	-1.16241	0.107258	0.299141	0	0	0	0	NA
1723	DHODH	DHODH	dihydroorotate dehydrogenase (quinone)	HGNC:2867	16q22.2	hDG25M08	human	NM_001361	224.832	114.479	115.225	1.66457	0.209842	0.286659	151.512	1.75071	0.0152885	0.142004	1	0	1	0	0.0130719
115817	DHRS1	DHRS1	dehydrogenase/reductase 1	HGNC:16445	14q11.2	hDG25A10	human	NM_138452	146.849	80.8131	69.5502	0.228956	-0.674491	-0.826251	99.0707	0.286433	0.691457	0.586672	0	0	0	0	0.00326797
79154	MGC4172	DHRS11	dehydrogenase/reductase 11	HGNC:28639	17q12	hDG25N20	human	NM_024308	82.9832	166.405	114.533	-0.946762	1.57381	0.269796	121.307	0.907321	0.208697	0.37354	0	0	0	0	0.00326797
147015	MGC23280	DHRS13	dehydrogenase/reductase 13	HGNC:28326	17q11.2	hDG25F22	human	NM_144683	70.8824	277.675	120.069	-1.16953	4.49661	0.404694	156.209	1.88185	0.00914307	0.111836	1	0	1	1	0.00326797
10202	DHRS2	DHRS2	dehydrogenase/reductase 2	HGNC:18349	14q11.2	hDG25H19	human	NM_005794	163.655	168.117	192.042	0.538355	1.61878	2.15837	174.605	2.3955	0.000903779	0.0355195	1	0	1	1	0.0130719
9249	DHRS3	DHRS3	dehydrogenase/reductase 3	HGNC:17693	1p36.1	hDG25C10	human	NM_004753	143.487	55.1355	88.2353	0.167076	-1.34898	-0.37097	95.6194	0.190066	0.792279	0.61366	0	0	0	0	NA
10901	DHRS4	DHRS4	dehydrogenase/reductase 4	HGNC:16985	14q11.2	hDG25P04	human	NM_021004	70.8824	187.518	111.073	-1.16953	2.12839	0.185485	123.158	0.958992	0.18395	0.3592	0	0	0	0	0.00326797
317749	DHRS4L2	DHRS4L2	dehydrogenase/reductase 4 like 2	HGNC:19731	14q11.2	hDG25E10	human	NM_198083	100.462	80.2425	76.4706	-0.624987	-0.689479	-0.657628	85.7251	-0.0862049	0.904919	0.641289	0	0	0	0	0.00653595
51635	DHRS7	DHRS7	dehydrogenase/reductase 7	HGNC:21524	14q23.1	hDG25G10	human	NM_016029	129.37	93.3666	145.675	-0.0928198	-0.34474	1.0286	122.804	0.94911	0.18848	0.361491	0	0	0	0	0.00326797
25979	DHRS7B	DHRS7B	dehydrogenase/reductase 7B	HGNC:24547	17p12	hDG25I10	human	NM_015510	156.261	143.01	140.83	0.402219	0.959276	0.910563	146.7	1.61636	0.0251188	0.173606	1	0	1	0	0.00326797
10170	DHRS9	DHRS9	dehydrogenase/reductase 9	HGNC:16888	2q31.1	hDG25M10	human	NM_005771	85.6723	75.107	64.0138	-0.897258	-0.824378	-0.961149	74.931	-0.387598	0.591217	0.552608	0	0	0	0	0.00653595
207063	DHRSX	DHRSX	dehydrogenase/reductase X-linked	HGNC:18399	Xp22.33 and Yp11.2	hDG25B06	human	NM_145177	97.7731	51.7118	51.5571	-0.674491	-1.43891	-1.26467	67.014	-0.608659	0.399022	0.475768	0	0	0	0	NA
8449	DHX16	DHX16	DEAH-box helicase 16	HGNC:2739	6p21.3	hDG23M04	human	NM_003587	101.13	218.277	142.03	-0.504165	2.38056	0.790532	153.812	1.81494	0.0119209	0.128268	1	0	1	1	0.0130719
90957	DHX57	DHX57	DEAH-box helicase 57	HGNC:20086	2p22.3	hDG19C03	human	NM_198963	107.057	123.461	166.186	0.251918	0.774415	1.6951	132.235	1.21244	0.0929712	0.2842	0	0	0	0	0.00653595
1660	DHX9	DHX9	DEAH-box helicase 9	HGNC:2750	1q25	DDRO22	human	NM_001357 NR_033302	58.5738	121.09	86.6887	-1.02877	0.38869	-0.469968	88.7842	-0.000788968	0.999128	0.664391	0	0	0	0	0.0228758
1729	DIAPH1	DIAPH1	diaphanous related formin 1	HGNC:2876	5q31	hDG02E07	human	NM_005219	46.6571	88.0385	57.5898	-0.443744	1.19538	0.141741	64.0951	-0.69016	0.33892	0.446899	0	0	0	0	0.0196078
1730	DIAPH2	DIAPH2	diaphanous related formin 2	HGNC:2877	Xq22	hDG02G07	human	NM_006729	37.0158	38.3556	53.7575	-0.816489	-0.701203	-0.0146628	43.0429	-1.27798	0.0765987	0.263328	0	0	0	0	0.0196078
85362	C20ORF158	DIDO1	death inducer-obliterator 1	HGNC:2680	20q13.33	hDG20I17	human	NM_152302	106.889	231.899	36.6692	0.0702595	2.97389	-1.05704	125.152	1.01469	0.15983	0.343559	0	0	0	0	0.0457516
11083	DIDO1	DIDO1	death inducer-obliterator 1	HGNC:2680	20q13.33	hDG18O20	human	NM_022105	52.6853	55.1277	42.6838	-0.332866	0.46426	-0.322583	50.1656	-1.0791	0.134857	0.32641	0	0	0	0	0.0457516
27292	HSA9761	DIMT1	DIM1 dimethyladenosine transferase 1 homolog	HGNC:30217	5q12.1	hDG23B10	human	NM_014473	135.161	71.2445	53.2961	0.367904	-1.2035	-1.51579	86.5673	-0.0626896	0.930781	0.646697	0	0	0	0	NA
1733	DIO1	DIO1	deiodinase, iodothyronine type I	HGNC:2883	1p33-p32	hDG11I07	human	NM_000792	58.9181	54.8008	41.4169	-0.155652	0.0989253	-0.853271	51.7119	-1.03593	0.151174	0.338747	0	0	0	0	NA
1734	DIO2	DIO2	deiodinase, iodothyronine, type II	HGNC:2884	14q24.2-q24.3	hDG11H03	human	NM_000793	70.0589	32.7888	54.4959	0.229772	-0.764423	-0.316929	52.4479	-1.01538	0.159452	0.343559	0	0	0	0	0.00326797
1735	DIO3	DIO3	deiodinase, iodothyronine, type III	HGNC:2885	14q32	hDG11J03	human	NM_001362	85.9132	46.5463	65.9896	0.778259	-0.22483	0.154401	66.1497	-0.632792	0.380587	0.467584	0	0	0	0	NA
9077	DIRAS3	DIRAS3	DIRAS family GTPase 3	HGNC:687	1p31	hDG06N05	human	NM_004675	66.1777	28.9459	18.1019	0.108709	-0.669585	-0.849858	37.7418	-1.426	0.048175	0.22186	-1	0	-1	0	NA
22894	KIAA1008	DIS3	DIS3 homolog, exosome endoribonuclease and 3'-5' exoribonuclease	HGNC:20604	13q21.32	hDG23F05	human	NM_014953	160.153	121.16	134.217	1.00833	0.0132253	0.58746	138.51	1.38766	0.0545162	0.231607	0	0	0	0	0.0130719
84976	DISP1	DISP1	dispatched RND transporter family member 1	HGNC:19711	1q42.12	hDG05F19	human	NM_032890	82.3343	58.9654	114.056	-0.401483	-0.999547	1.3811	85.1184	-0.103144	0.886354	0.637799	0	0	0	0	0.0163399
85455	DISP2	DISP2	dispatched RND transporter family member 2	HGNC:19712	15q14	hDG06K14	human	NM_033510	92.8368	170.629	64.9678	0.686844	2.39628	0.499123	109.478	0.577024	0.424005	0.488535	0	0	0	0	0.0130719
1736	DKC1	DKC1	dyskerin pseudouridine synthase 1	HGNC:2890	Xq28	hDG23O04	human	NM_001363	176.637	218.277	138.123	1.43074	2.38056	0.688996	177.679	2.48135	0.000586725	0.026676	1	0	1	1	0.00653595
22943	DKK1	DKK1	dickkopf WNT signaling pathway inhibitor 1	HGNC:2891	10q11.2	hDG01P19	human	NM_012242	112.104	93.748	69.2745	2.16991	1.27014	0.557188	91.7087	0.0808703	0.910778	0.642426	0	0	0	0	0.00653595
1737	DLAT	DLAT	dihydrolipoamide S-acetyltransferase	HGNC:2896	11q23.1	hDG01J09	human	NM_001931	51.8819	82.6909	62.2949	-0.874176	0.709529	0.171765	65.6226	-0.647511	0.369606	0.462136	0	0	0	0	0.00326797
1738	DLD	DLD	dihydrolipoamide dehydrogenase	HGNC:2898	7q31-q32	hDG25O10	human	NM_000108	117.269	132.168	111.073	-0.315587	0.674491	0.185485	120.17	0.87557	0.225049	0.381196	0	0	0	0	NA
1739	DLG1	DLG1	discs large MAGUK scaffold protein 1	HGNC:2900	3q29	K02C10	human	NM_004087	102.529	80.8782	108.464	1.08668	-0.309142	1.07255	97.2904	0.236723	0.742901	0.602809	0	0	0	0	0.0163399
1740	DLG2	DLG2	discs large MAGUK scaffold protein 2	HGNC:2901	11q21	K01I14	human	NM_001364	142.528	128.116	131.479	0.72199	0.867202	0.54334	134.041	1.26288	0.0801442	0.26866	0	0	0	0	0.0326797
1741	DLG3	DLG3	discs large MAGUK scaffold protein 3	HGNC:2902	Xq13.1	K02O12	human	NM_021120	108.309	133.003	84.8787	1.27404	0.983632	0.387003	108.73	0.55615	0.440936	0.495963	0	0	0	0	0.00326797
1742	DLG4	DLG4	discs large MAGUK scaffold protein 4	HGNC:2903	17p13.1	K02K08	human	NM_001365	62.0665	91.0765	57.4893	-0.22483	-0.0562076	-0.409117	70.2108	-0.519399	0.471712	0.508001	0	0	0	0	NA
9231	DLG5	DLG5	discs large MAGUK scaffold protein 5	HGNC:2904	10q23	K01H15	human	NM_004747	52.77	58.5507	78.7567	-1.56748	-1.05991	-0.777538	63.3592	-0.71071	0.324731	0.441628	0	0	0	0	0.0228758
65989	EGFL9	DLK2	delta like non-canonical Notch ligand 2	HGNC:21113	6p21.1	hDG02K12	human	NM_206539	70.99	57.9488	41.3024	0.496993	0.0467469	-0.522975	56.7471	-0.895334	0.214756	0.376995	0	0	0	0	0.00653595
28514	DLL1	DLL1	delta like canonical Notch ligand 1	HGNC:2908	6q27	hDG05C07	human	NM_005618	178.243	119.364	62.0025	2.63373	0.755755	-0.273008	119.87	0.867188	0.229555	0.383098	0	0	0	0	0.00980392
10683	DLL3	DLL3	delta like canonical Notch ligand 3	HGNC:2909	19q13.2	hDG05E07	human	NM_016941	140.691	100.35	26.6267	1.44534	0.20316	-1.39716	89.2225	0.0114511	0.987341	0.662014	0	0	0	0	0.00326797
54567	DLL4	DLL4	delta like canonical Notch ligand 4	HGNC:2910	15q14	hDG05G07	human	NM_019074	124.453	128.312	70.5938	0.93144	1.0158	0	107.786	0.529788	0.4629	0.504872	0	0	0	0	0.00326797
1755	DMBT1	DMBT1	deleted in malignant brain tumors 1	HGNC:2926	10q25.3-q26.1	hDG05J22	human	NM_004406	116.334	207.725	92.8301	0.674491	3.3237	0.706609	138.963	1.40031	0.0523698	0.229779	0	0	0	0	0.0261438
11144	DMC1	DMC1	DNA meiotic recombinase 1	HGNC:2927	22q13.1	DDRC15	human	NM_007068	64.6792	50.0114	68.5627	-0.91976	-1.08986	-0.887717	61.0844	-0.774225	0.283365	0.416217	0	0	0	0	0.00653595
11144	DMC1	DMC1	DNA meiotic recombinase 1	HGNC:2927	22q13.1	hDG23A06	human	NM_007068	95.2808	114.649	133.101	-0.654052	-0.145478	0.558449	114.344	0.712884	0.323255	0.44109	0	0	0	0	0.00653595
1760	DMPK	DMPK	dystrophia myotonica protein kinase	HGNC:2933	19q13.3	K03O13	human	NM_004409	134.649	126.617	159.206	0.641589	0.43011	1.24205	140.158	1.43367	0.0469826	0.219726	1	0	1	0	0.00653595
1761	DMRT1	DMRT1	doublesex and mab-3 related transcription factor 1	HGNC:2934	9p24.3	hDG23C06	human	NM_021951	113.36	86.4361	65.5738	-0.190765	-0.833194	-1.19668	88.4566	-0.00993562	0.989016	0.662612	0	0	0	0	NA
1763	DNA2	DNA2	DNA replication helicase/nuclease 2	HGNC:2939	10q21.3-q22.1	DDRJ19	human	NM_001080449	89.4825	89.5809	133.892	-0.476913	-0.266748	0.617921	104.318	0.432962	0.548558	0.539431	0	0	0	0	0.00980392
8701	DNAH11	DNAH11	dynein axonemal heavy chain 11	HGNC:2942	7p21	hDG02I07	human	NM_003777	25.0789	40.8047	27.1707	-1.27798	-0.607709	-1.09971	31.0181	-1.61374	0.025355	0.174451	-1	0	-1	0	0.0849673
146754	DNHD3	DNAH2	dynein axonemal heavy chain 2	HGNC:2948	17p13.1	hDG02A09	human	NM_020877	97.6184	81.7407	102.62	1.52648	0.954972	1.97948	93.9929	0.144651	0.84114	0.625761	0	0	0	0	0.0392157
1767	DNAH5	DNAH5	dynein axonemal heavy chain 5	HGNC:2950	5p15.2	hDG02K07	human	NM_001369	11.3056	30.3083	26.6916	-1.81048	-1.0084	-1.11926	22.7685	-1.84409	0.0106169	0.122174	-1	0	-1	0	0.130719
56171	DNAH7	DNAH7	dynein axonemal heavy chain 7	HGNC:18661	2q33.1	hDG02M07	human	NM_018897	121.033	52.0009	98.3084	2.43172	-0.180309	1.80353	90.4474	0.0456526	0.949562	0.650082	0	0	0	0	0.0915033
1770	DNAH9	DNAH9	dynein axonemal heavy chain 9	HGNC:2953	17p12	hDG03C06	human	NM_001372	67.2873	33.8647	56.6586	0.580811	-1.17387	-0.0190894	52.6035	-1.01103	0.161245	0.343807	0	0	0	0	0.0784314
27019	DNAI1	DNAI1	dynein axonemal intermediate chain 1	HGNC:2954	9p13.3	hDG03E06	human	NM_012144	70.0713	57.1183	30.345	0.705717	0.0324274	-1.06264	52.5115	-1.0136	0.160185	0.343559	0	0	0	0	0.00980392
10294	DNAJA2	DNAJA2	DnaJ heat shock protein family (Hsp40) member A2	HGNC:14884	16q12.1	hDG03N07	human	NM_005880	25.248	55.6181	44.7854	-1.30526	-0.0453984	-0.48996	41.8838	-1.31035	0.0694306	0.253334	0	0	0	0	NA
9093	DNAJA3	DNAJA3	DnaJ heat shock protein family (Hsp40) member A3	HGNC:11808	16p13.3	hDG03A09	human	NM_005147	94.0143	58.6185	100.943	1.77991	0.110253	1.73713	84.5251	-0.11971	0.868256	0.633208	0	0	0	0	0.00326797
3300	DNAJB2	DNAJB2	DnaJ heat shock protein family (Hsp40) member B2	HGNC:5228	2q35	hDG20B07	human	NM_006736	38.1481	100.928	35.4607	-1.55976	0	-1.09731	58.179	-0.85535	0.235954	0.386796	0	0	0	0	NA
4189	DNAJB9	DNAJB9	DnaJ heat shock protein family (Hsp40) member B9	HGNC:6968	7q31	hDG03C09	human	NM_012328	44.458	51.1174	40.2928	-0.443415	-0.278876	-0.668128	45.2894	-1.21526	0.0922073	0.283376	0	0	0	0	0.00653595
54431	DNAJC10	DNAJC10	DnaJ heat shock protein family (Hsp40) member C10	HGNC:24637	2q32.1	hDG22E03	human	NM_018981	71.0193	128.475	49.0581	-0.986443	-0.289067	-1.95247	82.8509	-0.166459	0.817591	0.620668	0	0	0	0	0.00980392
23341	DNAJC16	DNAJC16	DnaJ heat shock protein family (Hsp40) member C16	HGNC:29157	1p36.1	hDG03E09	human	NM_015291	43.0659	77.1214	60.1885	-0.505868	1.07011	0.120899	60.1253	-0.801007	0.267045	0.405511	0	0	0	0	NA
202052	DNAJC18	DNAJC18	DnaJ heat shock protein family (Hsp40) member C18	HGNC:28429	5q31.2	hDG03G09	human	NM_152686	44.458	56.1181	69.1737	-0.443415	-0.0194565	0.477234	56.5833	-0.899908	0.212422	0.375557	0	0	0	0	0.00326797
27000	ZRF1	DNAJC2	DnaJ heat shock protein family (Hsp40) member C2	HGNC:13192	7q22-q32	hDG03J09	human	NM_014377	39.1683	53.1177	51.2034	-0.680736	-0.175108	-0.235435	47.8298	-1.14432	0.112833	0.304543	0	0	0	0	0.00326797
54943	C21ORF55	DNAJC28	DnaJ heat shock protein family (Hsp40) member C28	HGNC:1297	21q22.11	hDG23I19	human	NM_017833	95.2808	140.149	75.6191	-0.654052	0.476111	-0.935584	103.683	0.41522	0.565066	0.544352	0	0	0	0	NA
84277	WBSCR18	DNAJC30	DnaJ heat shock protein family (Hsp40) member C30	HGNC:16410	7q11.23	hDG03I13	human	NM_032317	49.1909	54.3679	44.1436	-0.231076	-0.110253	-0.515413	49.2341	-1.10511	0.125706	0.317678	0	0	0	0	0.00326797
80331	DNAJC5	DNAJC5	DnaJ heat shock protein family (Hsp40) member C5	HGNC:16235	20q13.33	DDRA11	human	NM_025219	143.286	121.456	103.682	0.483726	0.396311	-0.078328	122.808	0.949236	0.188418	0.361491	0	0	0	0	NA
9829	DNAJC6	DNAJC6	DnaJ heat shock protein family (Hsp40) member C6	HGNC:15469	1p31.3	hDG27N12	human	NM_014787	72.0995	147.14	118.66	-0.415071	0.525706	0.0831564	112.633	0.665126	0.356741	0.455123	0	0	0	0	0.00653595
92737	DNER	DNER	delta/notch like EGF repeat containing	HGNC:24456	2q36.3	hDG05C09	human	NM_139072	86.3939	52.8137	40.777	-0.273008	-1.17833	-0.947499	59.9949	-0.804648	0.264879	0.404075	0	0	0	0	0.00326797
1785	DNM2	DNM2	dynamin 2	HGNC:2974	19p13.2	hDG02C09	human	NM_001005360	45.7389	72.2939	43.9371	-0.479243	0.594353	-0.415447	53.99	-0.972318	0.177897	0.355203	0	0	0	0	0.0163399
1786	DNMT1	DNMT1	DNA methyltransferase 1	HGNC:2976	19p13.2	hDG23E06	human	NM_001379	88.9	109.223	93.4775	-0.817565	-0.277731	-0.471418	97.2003	0.234208	0.745537	0.604134	0	0	0	0	0.0130719
1789	DNMT3B	DNMT3B	DNA methyltransferase 3 beta	HGNC:2979	20q11.2	hDG23G06	human	NM_006892	113.36	143.405	115.8	-0.190765	0.555463	0.108789	124.188	0.987771	0.171103	0.34938	0	0	0	0	0.0163399
1791	DNTT	DNTT	DNA nucleotidylexotransferase	HGNC:2983	10q23-q24	hDG23B06	human	NM_001017520	81.4556	88.6063	95.1517	-1.00833	-0.780293	-0.427903	88.4046	-0.0113885	0.987409	0.662014	0	0	0	0	NA
139818	DOCK11	DOCK11	dedicator of cytokinesis 11	HGNC:23483	Xq24	hDG04G13	human	NM_144658	160.943	47.2233	69.3004	1.55337	-0.425994	0.0277188	92.4888	0.102653	0.886899	0.637799	0	0	0	0	0.0359477
57171	DOLPP1	DOLPP1	dolichyldiphosphatase 1	HGNC:29565	9q34.1	hDG27J15	human	NM_020438	143.054	16.0664	33.9179	1.92835	-1.7755	-1.31202	64.3459	-0.683157	0.343892	0.449272	0	0	0	0	NA
1800	DPEP1	DPEP1	dipeptidase 1 (renal)	HGNC:3002	16q24	hDG11K07	human	NM_004413	64.4885	32.3302	73.5199	0.0370599	-0.782409	0.463204	56.7795	-0.894428	0.215223	0.377167	0	0	0	0	0.00653595
64174	DPEP2	DPEP2	dipeptidase 2	HGNC:23028	16q22.1	hDG11M07	human	NM_022355	103.482	43.3362	42.2096	1.38604	-0.350735	-0.820766	63.0091	-0.720485	0.318133	0.437791	0	0	0	0	0.00653595
64180	DPEP3	DPEP3	dipeptidase 3	HGNC:23029	16q22.1	hDG11A09	human	NM_022357	47.7772	19.9484	28.3379	-0.541075	-1.26804	-1.38961	32.0212	-1.58574	0.0280103	0.183732	-1	0	-1	0	0.00326797
8193	DPF1	DPF1	double PHD fingers 1	HGNC:20225	19q13.12	hDG20O09	human	NM_004647	83.7778	116.456	48.7538	-0.477764	0.352575	-0.654357	82.9958	-0.162414	0.821946	0.621809	0	0	0	0	0.00326797
5977	DPF2	DPF2	double PHD fingers 2	HGNC:9964	11q13.1	hDG20I22	human	NM_006268	133.556	97.5527	51.1707	0.702595	-0.0766467	-0.57382	94.093	0.147445	0.83812	0.624873	0	0	0	0	0.00653595
1801	DPH1	DPH1	diphthamide biosynthesis 1	HGNC:3003	17p13.3	hDG01J21	human	NM_001383	52.2331	53.3204	38.7767	-0.856426	-0.779606	-1.12694	48.11	-1.1365	0.115316	0.306053	0	0	0	0	0.00653595
57628	DPP10	DPP10	dipeptidyl peptidase like 10	HGNC:20823	2q14.1	hDG04M19	human	NM_020868	39.1919	35.9816	35.5121	-0.756247	-0.887488	-1.3305	36.8952	-1.44964	0.0445793	0.216947	-1	0	-1	0	0.0490196
10072	DPP3	DPP3	dipeptidyl peptidase 3	HGNC:3008	11q13.2	hDG29O05	human	NM_005700	39.7677	78.7215	56.621	-1.58786	-0.491578	-0.941742	58.3701	-0.850016	0.238877	0.388022	0	0	0	0	0.0130719
1803	DPP4	DPP4	dipeptidyl peptidase 4	HGNC:3009	2q24.2	hDG29A07	human	NM_001935	143.628	129.86	79.2694	1.082	0.342961	-0.547228	117.586	0.803417	0.265618	0.40413	0	0	0	0	0.0163399
1804	DPP6	DPP6	dipeptidyl peptidase like 6	HGNC:3010	7q36.2	hDG04O19	human	NM_001936	45.6566	52.8442	107.916	-0.633613	-0.195247	1.57997	68.8054	-0.558638	0.4389	0.495256	0	0	0	0	0.0326797
29952	DPP7	DPP7	dipeptidyl peptidase 7	HGNC:14892	9q34.3	hDG28O10	human	NM_013379	94.9331	142.732	104.526	0.501947	0.74194	1.03659	114.064	0.705073	0.328589	0.442966	0	0	0	0	0.00653595
54878	DPP8	DPP8	dipeptidyl peptidase 8	HGNC:16490	15q22	hDG28A12	human	NM_017743	190.64	237.628	90.0426	3.16854	2.79914	0.553792	172.77	2.34428	0.00116418	0.0408911	1	0	1	1	0.00326797
91039	DPP9	DPP9	dipeptidyl peptidase 9	HGNC:18648	19p13.3	hDG28C12	human	NM_139159	52.7094	153.622	50	-0.674491	0.978012	-0.780989	85.4437	-0.0940617	0.896308	0.63986	0	0	0	0	0.00653595
1806	DPYD	DPYD	dihydropyrimidine dehydrogenase	HGNC:3012	1p22	DDRO18	human	NM_000110 NM_001160301	102.456	66.1324	109.724	-0.245269	-0.754515	0.0609217	92.7709	0.110529	0.878278	0.635222	0	0	0	0	0.0228758
1806	DPYD	DPYD	dihydropyrimidine dehydrogenase	HGNC:3012	1p22	hDG25J19	human	NM_000110	111.891	87.0899	100.692	-0.414595	-0.509615	-0.0674491	99.8909	0.309335	0.668194	0.579643	0	0	0	0	0.0228758
1807	DPYS	DPYS	dihydropyrimidinase	HGNC:3013	8q22	hDG11C09	human	NM_001385	74.7724	31.8716	59.2519	0.392835	-0.800396	-0.121896	55.2986	-0.935778	0.194761	0.365638	0	0	0	0	0.0163399
1808	DPYSL2	DPYSL2	dihydropyrimidinase like 2	HGNC:3014	8p22-p21	hDG11E09	human	NM_001386	75.6294	60.3038	43.0022	0.422483	0.314762	-0.78826	59.6451	-0.814414	0.259121	0.400528	0	0	0	0	0.00653595
1812	DRD1	DRD1	dopamine receptor D1	HGNC:3020	5q34-q35	hDG08K15	human	NM_000794	84.2685	52.2188	135.149	-0.276896	-1.31192	1.6905	90.5455	0.0483901	0.946543	0.649353	0	0	0	0	0.00326797
1813	DRD2	DRD2	dopamine receptor D2	HGNC:3023	11q23.2	hDG08M15	human	NM_016574	94.1071	145.719	78.1802	0.0638991	1.46016	-0.307363	106.002	0.47997	0.506019	0.521548	0	0	0	0	0.00653595
1814	DRD3	DRD3	dopamine receptor D3	HGNC:3024	3q13.3	hDG08D04	human	NM_000796	79.7592	126.219	66.9811	-0.433094	0.882026	-0.700104	90.9863	0.0607007	0.93297	0.647417	0	0	0	0	0.0130719
1815	DRD4	DRD4	dopamine receptor D4	HGNC:3025	11p15.5	hDG08O15	human	NM_000797	92.4673	54.2188	70.3895	0.0070999	-1.25263	-0.580574	72.3585	-0.459428	0.524386	0.529477	0	0	0	0	0.00326797
1816	DRD5	DRD5	dopamine receptor D5	HGNC:3026	4p16.1	hDG08F04	human	NM_000798	92.4673	109.719	121.029	0.0070999	0.392835	1.1953	107.738	0.528449	0.464022	0.505066	0	0	0	0	0.0261438
1819	DRG2	DRG2	developmentally regulated GTP binding protein 2	HGNC:3030	17p13-p12	hDG04I13	human	NM_001388	158.788	45.9262	93.6647	1.51249	-0.479243	1.00712	99.4596	0.297292	0.680404	0.58455	0	0	0	0	NA
1823	DSC1	DSC1	desmocollin 1	HGNC:3035	18q12.1	hDG02P05	human	NM_004948	83.3859	81.3908	94.9551	0.976237	0.941616	1.66668	86.5773	-0.0624104	0.931086	0.646697	0	0	0	0	0.00326797
1824	DSC2	DSC2	desmocollin 2	HGNC:3036	18q12.1	hDG02B07	human	NM_004949	44.8207	51.651	58.0689	-0.514743	-0.193666	0.161291	51.5135	-1.04147	0.149	0.337069	0	0	0	0	0.00326797
1825	DSC3	DSC3	desmocollin 3	HGNC:3037	18q12.1	hDG03O16	human	NM_001941	89.2814	55.368	102.226	1.56757	-0.0583694	1.78804	82.2919	-0.182068	0.800825	0.616203	0	0	0	0	NA
1826	DSCAM	DSCAM	DS cell adhesion molecule	HGNC:3039	21q22.2-q22.3	hDG03A18	human	NM_001389	62.8328	76.6213	117.95	0.380962	1.04416	2.41162	85.8015	-0.0840725	0.907262	0.641679	0	0	0	0	0.0457516
57453	DSCAML1	DSCAML1	DS cell adhesion molecule like 1	HGNC:14656	11q23.3	hDG02D07	human	NM_020693	53.0846	52.3508	33.1587	-0.195247	-0.166953	-0.855332	46.198	-1.18989	0.0992068	0.290056	0	0	0	0	0.0196078
92126	C18ORF4	DSEL	dermatan sulfate epimerase-like	HGNC:18144	18q22.1	hDG31I07	human	NM_032160	158.451	168.469	122.322	1.2109	1.03984	0.590761	149.748	1.70144	0.0184025	0.152669	1	0	1	0	0.0163399
1828	DSG1	DSG1	desmoglein 1	HGNC:3048	18q12.1	hDG02F07	human	NM_001942	58.1349	66.6958	115.554	0	0.380653	2.50735	80.1282	-0.242482	0.736879	0.601406	0	0	0	0	0.0130719
1829	DSG2	DSG2	desmoglein 2	HGNC:3049	18q12.1	hDG02H07	human	NM_001943	42.066	69.8447	57.8293	-0.621241	0.500859	0.151516	56.58	-0.899998	0.212377	0.375557	0	0	0	0	0.00653595
1830	DSG3	DSG3	desmoglein 3	HGNC:3050	18q12.1	hDG02J07	human	NM_001944	40.2296	60.7479	36.2725	-0.692241	0.153597	-0.728255	45.75	-1.2024	0.0957047	0.286389	0	0	0	0	0.00653595
147409	DSG4	DSG4	desmoglein 4	HGNC:21307	18q12.1	hDG02L07	human	NM_177986	22.3242	19.1122	16.8713	-1.38448	-1.4358	-1.52005	19.4359	-1.93714	0.00727521	0.102973	-1	-1	-1	0	0.00326797
25778	RIPK5	DSTYK	dual serine/threonine and tyrosine protein kinase	HGNC:29043	1q32	K03E19	human	NM_015375	61.4662	100.741	189.195	-0.559334	-0.0391009	1.80138	117.134	0.790805	0.27323	0.409407	0	0	0	0	0.00653595
1837	DTNA	DTNA	dystrobrevin alpha	HGNC:3057	18q12	hDG02E09	human	NM_032975	129.297	46.0529	12.7994	2.75121	-0.407366	-1.68623	62.7164	-0.728656	0.312703	0.434565	0	0	0	0	0.0130719
1840	DTX1	DTX1	deltex E3 ubiquitin ligase 1	HGNC:3060	12q24	hDG20C09	human	NM_004416	191.037	105.654	92.8625	2.06563	0.107305	0.815429	129.851	1.14589	0.112365	0.304543	0	0	0	0	0.0163399
113878	DTX2	DTX2	deltex E3 ubiquitin ligase 2	HGNC:15973	7q11.23	hDG18I17	human	NM_020892	53.0741	41.2808	58.5662	-0.315346	-0.23651	0.469211	50.9737	-1.05654	0.143206	0.334568	0	0	0	0	0.00326797
196403	DTX3	DTX3	deltex E3 ubiquitin ligase 3	HGNC:24457	12q13.2	hDG20C12	human	NM_178502	28.6667	54.346	44.5242	-1.78459	-1.05772	-0.795295	42.5123	-1.2928	0.0732456	0.258919	0	0	0	0	0.00653595
151636	DTX3L	DTX3L	deltex E3 ubiquitin ligase 3L	HGNC:30323	3q21.1	hDG19J14	human	NM_138287	130.319	176.705	101.879	0.918283	2.10674	0.0621241	136.301	1.32599	0.0661774	0.2481	0	0	0	0	0.00326797
23220	DTX4	DTX4	deltex E3 ubiquitin ligase 4	HGNC:29151	11q12.2	hDG19C20	human	XM_166213	86.6312	57.5707	90.6946	-0.333182	-0.87434	-0.221872	78.2988	-0.293562	0.684176	0.585093	0	0	0	0	0.00980392
1841	DTYMK	DTYMK	deoxythymidylate kinase	HGNC:3061	2q37	K02I15	human	NM_012145	97.9046	71.813	89.4437	0.936793	-0.533972	0.51969	86.3871	-0.0677202	0.925239	0.645784	0	0	0	0	NA
53905	DUOX1	DUOX1	dual oxidase 1	HGNC:3062	15q21.1	hDG01G12	human	NM_017434	38.3628	32.9338	50.7634	-1.55754	-1.81324	-0.465022	40.6867	-1.34378	0.0626135	0.241574	0	0	0	0	0.0228758
50506	DUOX2	DUOX2	dual oxidase 2	HGNC:13273	15q15.3-q21	hDG25N19	human	NM_014080	204.664	92.796	131.834	1.29329	-0.359728	0.691353	143.098	1.51577	0.0357237	0.199475	1	0	1	0	0.00653595
338599	DUPD1	DUPD1	dual specificity phosphatase and pro isomerase domain containing 1	HGNC:23481	10q22.3	hDG27F07	human	NM_001003892	50.3682	148.27	171.414	-1.1328	0.545544	0.951679	123.351	0.964378	0.181506	0.356972	0	0	0	0	0.00653595
1843	DUSP1	DUSP1	dual specificity phosphatase 1	HGNC:3064	5q35.1	hDG27O17	human	NM_004417	60.3175	71.9986	89.4774	-0.804201	-0.793519	-0.397303	73.9311	-0.415518	0.564779	0.544352	0	0	0	0	NA
11221	DUSP10	DUSP10	dual specificity phosphatase 10	HGNC:3065	1q41	hDG27A19	human	NM_007207	120.013	143.75	151.21	1.16739	0.466192	0.619053	138.324	1.38248	0.0554231	0.2336	0	0	0	0	0.00653595
8446	DUSP11	DUSP11	dual specificity phosphatase 11	HGNC:3066	2p13.1	hDG27P11	human	NM_003584	38.0625	89.5127	154.016	-1.53922	-0.48603	0.665251	93.8638	0.141045	0.845061	0.626139	0	0	0	0	NA
11266	DUSP12	DUSP12	dual specificity phosphatase 12	HGNC:3067	1q21-q22	hDG27B07	human	NM_007240	100.638	124.541	151.21	0.527486	0.128947	0.619053	125.463	1.02337	0.156198	0.341243	0	0	0	0	NA
51207	DUSP13	DUSP13	dual specificity phosphatase 13	HGNC:19681	10q23.1	hDG27P16	human	NM_001007272	65.8157	147.705	189.372	-0.622607	0.535625	1.24735	134.298	1.27004	0.078474	0.266613	0	0	0	0	NA
11072	DUSP14	DUSP14	dual specificity phosphatase 14	HGNC:17007	17q12	hDG27D19	human	NM_007026	55.081	255.049	145.598	-0.977147	2.42023	0.526657	151.909	1.76181	0.0146671	0.140327	1	0	1	1	0.00326797
128853	DUSP15	DUSP15	dual specificity phosphatase 15	HGNC:16236	20q11.21	hDG27F14	human	NM_080611	60.0556	135.275	161.312	-0.812848	0.317407	0.785366	118.881	0.839579	0.24472	0.391885	0	0	0	0	0.00326797
80824	DUSP16	DUSP16	dual specificity phosphatase 16	HGNC:17909	12p13	hDG27E19	human	NM_030640	85.4525	196.292	192.739	0.025942	1.38866	1.30278	158.161	1.93637	0.00730395	0.102973	1	0	1	0	0.00653595
150290	DUSP18	DUSP18	dual specificity phosphatase 18	HGNC:18484	22q12.1	hDG27K17	human	NM_152511	76.5505	56.7444	79.3757	-0.268067	-1.06133	-0.563616	70.8902	-0.500428	0.48805	0.514983	0	0	0	0	0.00326797
142679	DUSP19	DUSP19	dual specificity phosphatase 19	HGNC:18894	2q32.1	hDG27N16	human	NM_080876	48.5354	117.196	156.822	-1.19333	0	0.711449	107.518	0.522299	0.469269	0.507125	0	0	0	0	0.00326797
1844	DUSP2	DUSP2	dual specificity phosphatase 2	HGNC:3068	2q11	hDG27G19	human	NM_004418	149.599	59.5692	58.611	2.14453	-1.01174	-0.905481	89.2598	0.0124909	0.986192	0.662014	0	0	0	0	0.00326797
63904	DUSP21	DUSP21	dual specificity phosphatase 21	HGNC:20476	Xp11.4-p11.23	hDG27I17	human	NM_022076	106.398	27.9308	35.6015	0.717727	-1.5672	-1.2843	56.6435	-0.898225	0.213297	0.375814	0	0	0	0	0.00653595
56940	DUSP22	DUSP22	dual specificity phosphatase 22	HGNC:16077	6p25.3	hDG27P05	human	NM_020185	75.765	141.49	107.436	-0.294009	0.426516	-0.101636	108.23	0.542191	0.452493	0.499878	0	0	0	0	0.00326797
54935	DUSP23	DUSP23	dual specificity phosphatase 23	HGNC:21480	1q23.1	hDG27G13	human	NM_017823	96.449	113.242	72.6412	0.389129	-0.0694329	-0.674491	94.1106	0.147936	0.837583	0.624791	0	0	0	0	NA
78986	DUSP26	DUSP26	dual specificity phosphatase 26 (putative)	HGNC:28161	8p12	hDG27N05	human	NM_024025	69.2194	65.7839	87.2325	-0.510192	-0.902627	-0.434261	74.0786	-0.411399	0.568642	0.545615	0	0	0	0	0.00653595
1845	DUSP3	DUSP3	dual specificity phosphatase 3	HGNC:3069	17q21	hDG27L16	human	NM_004090	107.969	121.151	191.056	0.769611	0.0694329	1.27506	140.059	1.43091	0.0474172	0.219899	1	0	1	0	0.00326797
1846	DUSP4	DUSP4	dual specificity phosphatase 4	HGNC:3070	8p12-p11	hDG27D08	human	NM_001394	76.2887	125.106	164.118	-0.276714	0.138866	0.831564	121.837	0.922131	0.201366	0.369107	0	0	0	0	0.00326797
1847	DUSP5	DUSP5	dual specificity phosphatase 5	HGNC:3071	10q25	hDG27M17	human	NM_004419	82.8342	199.117	202.28	-0.0605312	1.43825	1.45986	161.41	2.02709	0.00498076	0.0851923	1	0	1	0	0.00980392
1848	DUSP6	DUSP6	dual specificity phosphatase 6	HGNC:3072	12q21.33	hDG27C19	human	NM_001946	85.4525	152.225	145.598	0.025942	0.614977	0.526657	127.758	1.08745	0.131876	0.323587	0	0	0	0	0.00980392
1849	DUSP7	DUSP7	dual specificity phosphatase 7	HGNC:3073	3p21	hDG27F08	human	NM_001947	99.0673	219.456	109.681	0.475602	1.79534	-0.0646772	142.735	1.50563	0.0369832	0.199502	1	0	1	0	0.00326797
1850	DUSP8	DUSP8	dual specificity phosphatase 8	HGNC:3074	11p15.5	hDG27G17	human	NM_004420	99.8527	70.8686	90.0386	0.501544	-0.813357	-0.388063	86.92	-0.052841	0.941632	0.648638	0	0	0	0	NA
1852	DUSP9	DUSP9	dual specificity phosphatase 9	HGNC:3076	Xq28	hDG27F19	human	NM_001395	118.704	122.281	166.363	1.12415	0.0892708	0.868522	135.783	1.31151	0.0691874	0.253222	0	0	0	0	0.00326797
1854	DUT	DUT	deoxyuridine triphosphatase	HGNC:3078	15q21.1	DDRP12	human	NM_001025248 NM_001025249 NM_001948	62.0081	40.1191	39.1079	-0.967451	-1.29563	-1.56656	47.0783	-1.16531	0.106386	0.298525	0	0	0	0	NA
1856	DVL2	DVL2	dishevelled segment polarity protein 2	HGNC:3086	17p13.1	hDG09L22	human	NM_004422	115.72	72.1334	60.3448	1.56404	0.27239	-0.227356	82.7327	-0.169758	0.814037	0.620096	0	0	0	0	0.00326797
1778	DYNC1H1	DYNC1H1	dynein cytoplasmic 1 heavy chain 1	HGNC:2961	14q32.31	hDG02G09	human	NM_001376	27.8336	42.2042	19.506	-1.17148	-0.554284	-1.41252	29.8479	-1.64642	0.0225358	0.165131	-1	0	-1	0	0.0261438
51143	DYNC1LI1	DYNC1LI1	dynein cytoplasmic 1 light intermediate chain 1	HGNC:18745	3p23	hDG02I09	human	NM_016141	85.6815	87.3387	73.6377	1.06499	1.16867	0.796681	82.2193	-0.184094	0.798654	0.61587	0	0	0	0	NA
1859	DYRK1A	DYRK1A	dual specificity tyrosine phosphorylation regulated kinase 1A	HGNC:3091	21q22.13	K02L16	human	NM_130436	70.159	63.881	46.077	0.0374717	-0.730698	-0.740834	60.039	-0.803416	0.265607	0.40413	0	0	0	0	0.00980392
9149	DYRK1B	DYRK1B	dual specificity tyrosine phosphorylation regulated kinase 1B	HGNC:3092	19q13.2	K01D15	human	NM_004714	73.6266	65.8937	48.4693	-1.03549	-0.856496	-1.53634	62.6632	-0.730143	0.311677	0.43453	0	0	0	0	0.0130719
8445	DYRK2	DYRK2	dual specificity tyrosine phosphorylation regulated kinase 2	HGNC:3093	12q15	K02M09	human	NM_006482	64.3786	116.006	74.2273	-0.149887	0.562076	0.0774006	84.8705	-0.110066	0.878784	0.635408	0	0	0	0	0.00653595
8444	DYRK3	DYRK3	dual specificity tyrosine phosphorylation regulated kinase 3	HGNC:3094	1q32	K01C22	human	NM_003582	127.258	108.406	53.7041	0.332495	0.321186	-1.40519	96.4559	0.213424	0.767443	0.608932	0	0	0	0	0.00653595
8798	DYRK4	DYRK4	dual specificity tyrosine phosphorylation regulated kinase 4	HGNC:3095	12p13.32	K01P03	human	NM_003845	82.9376	58.9372	76.5132	-0.797989	-1.04921	-0.833746	72.796	-0.447213	0.53547	0.532437	0	0	0	0	0.0261438
8291	DYSF	DYSF	dysferlin	HGNC:3097	2p13.3	hDG22I14	human	NM_003494	79.615	239.686	124.501	-0.682922	1.20445	1.71285	147.934	1.6508	0.0222005	0.163636	1	0	1	0	0.0326797
9666	DZIP3	DZIP3	DAZ interacting zinc finger protein 3	HGNC:30938	3q13.13	hDG19C22	human	NM_014648	68.4752	17.6373	102.578	-0.853271	-1.87359	0.0798739	62.8967	-0.723624	0.316036	0.436079	0	0	0	0	0.0196078
10148	EBI3	EBI3	Epstein-Barr virus induced 3	HGNC:3129	19p13	hDG05E12	human	NM_005755	104.155	51.6952	53.9166	0.289067	-1.21083	-0.529957	69.9222	-0.527456	0.46487	0.505314	0	0	0	0	NA
10682	EBP	EBP	emopamil binding protein (sterol isomerase)	HGNC:3133	Xp11.23-p11.22	hDG22P17	human	NM_006579	164.14	222.945	111.714	2.3017	0.979618	1.09161	166.266	2.16267	0.00273393	0.0609553	1	0	1	1	NA
1889	ECE1	ECE1	endothelin converting enzyme 1	HGNC:3146	1p36.1	hDG28E12	human	NM_001397	111.26	119.397	95.5804	0.956836	0.236072	0.73839	108.746	0.556582	0.440576	0.495862	0	0	0	0	0.00653595
9718	ECE2	ECE2	endothelin converting enzyme 2	HGNC:13275	3q27.1	hDG28G12	human	NM_014693	134.342	115.508	56.8158	1.59995	0.15176	-0.553792	102.222	0.374422	0.603902	0.558003	0	0	0	0	0.00980392
9427	ECEL1	ECEL1	endothelin converting enzyme like 1	HGNC:3147	2q37.1	hDG28I12	human	NM_004826	80.8586	59.5041	44.4622	0.109801	-1.06232	-0.965587	61.6083	-0.759598	0.292562	0.422589	0	0	0	0	0.00326797
1891	ECH1	ECH1	enoyl-CoA hydratase 1	HGNC:3149	19q13.1	hDG22J07	human	NM_001398	128.324	256.428	80.2946	1.03703	1.42928	-0.434869	155.015	1.84853	0.0104457	0.120804	1	0	1	0	0.00326797
55862	ECHDC1	ECHDC1	ethylmalonyl-CoA decarboxylase 1	HGNC:21489	6q22.33	hDG22I15	human	NM_018479	99.6717	128.475	99.8402	0.0252934	-0.289067	0.514743	109.329	0.572869	0.42732	0.490335	0	0	0	0	0.00326797
1632	DCI	ECI1	enoyl-CoA delta isomerase 1	HGNC:2703	16p13.3	hDG22G15	human	NM_001919	106.596	99.7758	100.571	0.269796	-0.674491	0.550242	102.314	0.376999	0.6014	0.556887	0	0	0	0	0.00326797
1894	ECT2	ECT2	epithelial cell transforming 2	HGNC:3155	3q26.1-q26.2	hDG10E03	human	NM_018098	51.8413	39.604	50.4679	-0.343377	-0.944287	-0.792982	47.3044	-1.15899	0.108293	0.300726	0	0	0	0	0.0163399
1896	EDA	EDA	ectodysplasin A	HGNC:3157	Xq12-q13.1	hDG09K07	human	NM_001005609	40.2094	35.1885	34.787	-1.12415	-1.24521	-1.18225	36.7283	-1.4543	0.0438983	0.216575	-1	0	-1	0	0.0130719
1908	EDN3	EDN3	endothelin 3	HGNC:3178	20q13.2-q13.3	hDG09P22	human	NM_207033	104.737	77.8172	71.2982	1.17303	0.505868	0.181885	84.6173	-0.117136	0.871063	0.634452	0	0	0	0	0.00326797
1909	EDNRA	EDNRA	endothelin receptor type A	HGNC:3179	4q31.22	hDG08J04	human	NM_001957	83.0387	68.7188	95.7091	-0.319496	-0.82273	0.307363	82.4888	-0.176568	0.806719	0.618082	0	0	0	0	NA
1910	EDNRB	EDNRB	endothelin receptor type B	HGNC:3180	13q22	hDG08O17	human	NM_000115	123.623	80.2188	60.6512	1.08629	-0.481779	-0.922089	88.1643	-0.0180974	0.979994	0.659873	0	0	0	0	0.00980392
1936	EEF1D	EEF1D	eukaryotic translation elongation factor 1 delta	HGNC:3211	8q24	hDG23D06	human	NM_001960	123.463	67.9891	48.8315	0.0681304	-1.28285	-1.63183	80.0945	-0.243422	0.735901	0.601263	0	0	0	0	NA
9521	EEF1E1	EEF1E1	eukaryotic translation elongation factor 1 epsilon 1	HGNC:3212	6p24.3	DDRB16	human	NM_001135650 NM_004280	164.274	126.952	147.864	0.858443	0.510631	0.939936	146.363	1.60695	0.0259794	0.175884	1	0	1	0	0.00653595
29904	EEF2K	EEF2K	eukaryotic elongation factor 2 kinase	HGNC:24615	16p12	K03E08	human	NM_013302	113.596	127.695	100.11	0.296118	0.449661	0.139833	113.801	0.697727	0.333647	0.444652	0	0	0	0	0.00980392
1942	EFNA1	EFNA1	ephrin A1	HGNC:3221	1q21-q22	hDG09L14	human	NM_004428	40.484	73.3965	115.923	-1.11438	0.324274	1.84917	76.6011	-0.340966	0.63661	0.570714	0	0	0	0	NA
1943	EFNA2	EFNA2	ephrin A2	HGNC:3222	19p13	hDG09J16	human	NM_001405	56.1352	39.6092	33.9757	-0.557188	-1.06362	-1.21257	43.24	-1.27248	0.0778761	0.265749	0	0	0	0	NA
1944	EFNA3	EFNA3	ephrin A3	HGNC:3223	1q21-q22	hDG09A15	human	NM_004952	109.954	100.553	128.093	1.35876	1.43978	2.30388	112.867	0.671642	0.352035	0.452864	0	0	0	0	NA
1945	EFNA4	EFNA4	ephrin A4	HGNC:3224	1q21-q22	hDG09C15	human	NM_005227	42.9552	50.9769	31.5416	-1.0264	-0.596665	-1.30351	41.8246	-1.312	0.0690786	0.253222	0	0	0	0	NA
1946	EFNA5	EFNA5	ephrin A5	HGNC:3225	5q21	hDG09E15	human	NM_001962	54.7623	52.24	33.1643	-0.606064	-0.544781	-1.24288	46.7222	-1.17525	0.103433	0.294822	0	0	0	0	0.00653595
1947	EFNB1	EFNB1	ephrin B1	HGNC:3226	Xq12	hDG09G15	human	NM_004429	63.549	26.347	14.0974	-0.293257	-1.6084	-1.95527	34.6644	-1.51193	0.0361828	0.199475	-1	0	-1	0	0.00653595
1948	EFNB2	EFNB2	ephrin B2	HGNC:3227	13q33	hDG09P14	human	NM_004093	72.0611	87.9218	89.5538	0.00977523	0.920939	0.863954	83.1789	-0.1573	0.827458	0.623573	0	0	0	0	0.00326797
1949	EFNB3	EFNB3	ephrin B3	HGNC:3228	17p13.1	hDG10C03	human	NM_001406	104.252	90.9821	39.4232	1.63104	0.527329	-1.20315	78.2192	-0.295786	0.68192	0.585093	0	0	0	0	NA
1950	EGF	EGF	epidermal growth factor	HGNC:3229	4q25	hDG10E09	human	NM_001963	38.4944	47.7388	18.3157	-0.846179	-0.711281	-1.98701	34.8496	-1.50676	0.0368227	0.199494	-1	0	-1	0	0.0196078
1956	EGFR	EGFR	epidermal growth factor receptor	HGNC:3236	7p12	K01H21	human	NM_005228	112.733	108.406	165.506	-0.0379995	0.321186	1.39582	128.882	1.11882	0.121091	0.311655	0	0	0	0	0.0457516
54583	EGLN1	EGLN1	egl-9 family hypoxia inducible factor 1	HGNC:1232	1q42.1	hDG25A12	human	NM_022051	85	143.01	83.391	-0.909634	0.959276	-0.489006	103.8	0.418495	0.562002	0.543353	0	0	0	0	0.00326797
112398	EGLN2	EGLN2	egl-9 family hypoxia inducible factor 2	HGNC:14660	19q13.2	hDG25C12	human	NM_080732	84.3277	85.9486	79.9308	-0.92201	-0.539593	-0.573317	83.4024	-0.15106	0.834201	0.623826	0	0	0	0	0.00326797
112399	EGLN3	EGLN3	egl-9 family hypoxia inducible factor 3	HGNC:14661	14q12	hDG25D06	human	NM_022073	86.3445	47.1469	44.6367	-0.884882	-1.55882	-1.43329	59.376	-0.821927	0.254756	0.397791	0	0	0	0	NA
1962	EHHADH	EHHADH	enoyl-CoA, hydratase/3-hydroxyacyl CoA dehydrogenase	HGNC:3247	3q26.3-q28	hDG25E12	human	NM_001966	79.6218	77.3894	125.606	-1.00864	-0.764423	0.539593	94.2056	0.150589	0.834713	0.623954	0	0	0	0	0.00653595
79813	EHMT1	EHMT1	euchromatic histone lysine methyltransferase 1	HGNC:24650	9q34.3	hDG18H07	human	NM_024757	82.6245	49.9351	53.2721	1.01612	0.201471	0.20528	61.9439	-0.750227	0.298557	0.426192	0	0	0	0	0.0163399
10919	EHMT2	EHMT2	euchromatic histone lysine methyltransferase 2	HGNC:14129	6p21.3	hDG20P05	human	NM_006709	60.6667	64.4726	82.5906	-1.02579	-0.827784	0.47315	69.2433	-0.546412	0.448972	0.498135	0	0	0	0	0.0196078
27102	EIF2AK1	EIF2AK1	eukaryotic translation initiation factor 2 alpha kinase 1	HGNC:24921	7p22	K02A21	human	NM_014413	99.0607	55.949	90.9653	0.974264	-0.927425	0.563919	81.9917	-0.19045	0.791861	0.613581	0	0	0	0	0.0196078
5610	EIF2AK2	EIF2AK2	eukaryotic translation initiation factor 2 alpha kinase 2	HGNC:9437	2p22-p21	K01G17	human	NM_002759	134.707	118.068	176.724	0.522493	0.588841	1.67686	143.166	1.51767	0.0354828	0.199216	1	0	1	0	NA
9451	EIF2AK3	EIF2AK3	eukaryotic translation initiation factor 2 alpha kinase 3	HGNC:3255	2p12	K01P15	human	NM_004836	63.5708	84.4444	42.1126	-1.29198	-0.342598	-1.69559	63.376	-0.710241	0.325053	0.441678	0	0	0	0	0.00326797
440275	EIF2AK4	EIF2AK4	eukaryotic translation initiation factor 2 alpha kinase 4	HGNC:19687	15q13.3	K01A10	human	NM_001013703	116.457	49.6618	116.149	0.0569992	-1.30616	0.159255	94.0892	0.147339	0.838233	0.624873	0	0	0	0	0.0196078
8663	EIF3S8	EIF3C	eukaryotic translation initiation factor 3 subunit C	HGNC:3279	16p11.2	hDG23B18	human	NM_003752	104.852	157.511	121.381	-0.408782	0.899321	0.253841	127.915	1.09182	0.130325	0.321777	0	0	0	0	NA
3646	EIF3S6	EIF3E	eukaryotic translation initiation factor 3 subunit E	HGNC:3277	8q22-q23	hDG23M06	human	NM_001568	113.892	78.2977	57.7607	-0.177139	-1.03157	-1.39975	83.3167	-0.153452	0.831617	0.623826	0	0	0	0	0.00653595
8665	EIF3S5	EIF3F	eukaryotic translation initiation factor 3 subunit F	HGNC:3275	11p15.4	hDG23K06	human	NM_003754	114.955	196.033	48.2735	-0.149887	1.83832	-1.64634	119.754	0.863948	0.231324	0.384099	0	0	0	0	NA
1982	EIF4G2	EIF4G2	eukaryotic translation initiation factor 4 gamma 2	HGNC:3297	11p15	hDG23O06	human	NM_001418	83.0508	135.266	113.01	-0.967451	0.357083	0.0362629	110.442	0.603955	0.402676	0.476738	0	0	0	0	NA
3692	ITGB4BP	EIF6	eukaryotic translation initiation factor 6	HGNC:6159	20q11.2	hDG23P03	human	NM_002212	150.05	256.799	123.614	0.749434	3.31955	0.311861	176.821	2.45738	0.000663564	0.0279755	1	0	1	1	NA
60528	ELAC2	ELAC2	elaC ribonuclease Z 2	HGNC:14198	17p11.2	hDG11G09	human	NM_018127	67.4879	30.0373	72.3309	0.140828	-0.872341	0.414446	56.6187	-0.898918	0.21293	0.375752	0	0	0	0	NA
1991	ELA2	ELANE	elastase, neutrophil expressed	HGNC:3309	19p13.3	hDG29E07	human	NM_001972	123.403	80.8231	156.712	0.562076	-0.457282	0.801753	120.313	0.879557	0.222959	0.380237	0	0	0	0	NA
1995	ELAVL3	ELAVL3	ELAV like neuron-specific RNA binding protein 3	HGNC:3314	19p13.2	hDG23A08	human	NM_001420	76.67	91.3191	66.1318	-1.13096	-0.714167	-1.18217	78.0403	-0.300781	0.676843	0.583473	0	0	0	0	0.00326797
1996	ELAVL4	ELAVL4	ELAV like neuron-specific RNA binding protein 4	HGNC:3315	1p34	hDG23C08	human	NM_021952	77.7335	153.171	80.0837	-1.10371	0.793519	-0.819543	103.663	0.414649	0.565608	0.544762	0	0	0	0	0.0228758
114794	KIAA1904	ELFN2	extracellular leucine rich repeat and fibronectin type III domain containing 2	HGNC:29396	22q13.1	hDG07A11	human	NM_052906	107.692	123.708	18.1946	0.693055	3.16105	-1.94333	83.1985	-0.156754	0.82806	0.623605	0	0	0	0	0.00980392
2006	ELN	ELN	elastin	HGNC:3327	7q11.1-q21.1	hDG02M12	human	NM_000501	40.2296	72.6438	64.7754	-0.692241	0.607709	0.434998	59.2163	-0.826389	0.252183	0.396805	0	0	0	0	0.00326797
54898	ELOVL2	ELOVL2	ELOVL fatty acid elongase 2	HGNC:14416	6p24.1	hDG31G22	human	NM_017770	103.699	231.226	114.909	0.159329	2.00474	0.432604	149.944	1.70694	0.0180404	0.151146	1	0	1	1	NA
83401	ELOVL3	ELOVL3	ELOVL fatty acid elongase 3	HGNC:18047	10q24	hDG31A13	human	NM_152310	95.4027	191.622	137.585	0	1.39582	0.916377	141.537	1.47218	0.0413791	0.210242	1	0	1	0	0.00326797
79071	ELOVL6	ELOVL6	ELOVL fatty acid elongase 6	HGNC:15829	4q25	hDG31C13	human	NM_024090	199.378	102.666	166.803	1.99692	0.0281038	1.5397	156.282	1.8839	0.00905237	0.111836	1	0	1	0	0.00326797
133418	EMB	EMB	embigin	HGNC:30465	5q11.1	hDG01I09	human	NM_198449	65.2255	57.4668	52.8876	-0.199685	-0.569375	-0.347719	58.5266	-0.845645	0.241297	0.389497	0	0	0	0	0.00326797
146956	EME1	EME1	essential meiotic structure-specific endonuclease 1	HGNC:24965	17q21.33	DDRH20	human	NM_001166131 NM_152463	168.09	79.3222	166.368	0.926573	-0.480146	1.36639	137.927	1.37137	0.0574269	0.235388	0	0	0	0	0.00653595
197342	EME2	EME2	essential meiotic structure-specific endonuclease subunit 2	HGNC:27289	16p13.3	DDRH22	human	NM_001010865	181.827	162.858	113.878	1.17184	1.25753	0.156656	152.854	1.78818	0.0132289	0.135729	1	0	1	0	NA
11117	EMILIN1	EMILIN1	elastin microfibril interfacer 1	HGNC:19880	2p23.3-p23.2	hDG02O12	human	NM_007046	89.3544	91.8872	76.0329	1.20698	1.3423	0.894433	85.7582	-0.0852817	0.905932	0.641679	0	0	0	0	0.0163399
2012	EMP1	EMP1	epithelial membrane protein 1	HGNC:3333	12p13.1	hDG03O19	human	NM_001423	60.8839	54.1178	71.0991	0.293528	-0.123224	0.553591	62.0336	-0.747722	0.30017	0.426667	0	0	0	0	0.00326797
2013	EMP2	EMP2	epithelial membrane protein 2	HGNC:3334	16p13.2	hDG02K09	human	NM_001424	43.9024	55.8496	33.8772	-0.550242	-0.0333906	-0.826007	44.5431	-1.2361	0.0867612	0.277872	0	0	0	0	NA
2014	EMP3	EMP3	epithelial membrane protein 3	HGNC:3335	19q13.3	hDG03G06	human	NM_001425	63.1112	54.3679	49.5989	0.393453	-0.110253	-0.299067	55.6926	-0.924776	0.200056	0.36904	0	0	0	0	0.00326797
56946	C11ORF30	EMSY	EMSY, BRCA2 interacting transcriptional repressor	HGNC:18071	11q13.5	DDRG20	human	NM_020193	98.6406	100.939	122.186	-0.3134	-0.0304855	0.348124	107.255	0.514956	0.475509	0.509407	0	0	0	0	NA
8507	ENC1	ENC1	ectodermal-neural cortex 1	HGNC:3345	5q13	hDG20C05	human	NM_003633	110.444	92.1519	27.6057	0.154571	-0.199281	-1.35905	76.734	-0.337255	0.640288	0.571913	0	0	0	0	0.00653595
2021	ENDOG	ENDOG	endonuclease G	HGNC:3346	9q34.1	hDG23F06	human	NM_004435	109.638	56.5955	123.614	-0.286148	-1.56059	0.311861	96.6156	0.217881	0.76273	0.608452	0	0	0	0	NA
2022	ENG	ENG	endoglin	HGNC:3349	9q34.11	hDG05E09	human	NM_000118	68.633	67.9133	54.422	-0.835084	-0.739502	-0.513898	63.6561	-0.702419	0.330406	0.444394	0	0	0	0	NA
2027	ENO3	ENO3	enolase 3	HGNC:3354	17p13.2	hDG22G10	human	NM_001976	115.669	203.812	78.4679	0.590179	0.722669	-0.523618	132.65	1.22403	0.0899135	0.281165	0	0	0	0	0.00326797
55556	ENOSF1	ENOSF1	enolase superfamily member 1	HGNC:30365	18p11.32	DDRL16	human	NM_001126123 NM_017512 NM_202758	183.735	135.745	190.536	1.20591	0.693544	1.92339	170.005	2.26708	0.001684	0.0479117	1	0	1	0	0.00653595
2028	ENPEP	ENPEP	glutamyl aminopeptidase	HGNC:3355	4q25	hDG28M12	human	NM_001977	79.1696	141.954	58.9457	0.0627433	0.725078	-0.482793	93.3565	0.126881	0.860447	0.630288	0	0	0	0	0.0359477
5167	ENPP1	ENPP1	ectonucleotide pyrophosphatase/phosphodiesterase 1	HGNC:3356	6q22-q23	hDG27M18	human	NM_006208	122.369	200.812	186.566	1.24521	1.46801	1.20115	169.916	2.26459	0.00170436	0.0479964	1	0	1	0	0.0163399
5168	ENPP2	ENPP2	ectonucleotide pyrophosphatase/phosphodiesterase 2	HGNC:3357	8q24.12	hDG27K18	human	NM_006209	106.922	78.7782	88.9162	0.735022	-0.674491	-0.406542	91.5388	0.076126	0.915992	0.643902	0	0	0	0	0.0163399
5169	ENPP3	ENPP3	ectonucleotide pyrophosphatase/phosphodiesterase 3	HGNC:3358	6q22	hDG27I18	human	NM_005021	107.184	7.02684	38.4076	0.743669	-1.9342	-1.23811	50.8727	-1.05936	0.142166	0.333822	0	0	0	0	0.0163399
22875	ENPP4	ENPP4	ectonucleotide pyrophosphatase/phosphodiesterase 4 (putative)	HGNC:3359	6p12.3	hDG23J17	human	NM_014936	173.446	87.5212	79.5256	1.34898	-0.806744	-0.834048	113.498	0.689267	0.339571	0.447146	0	0	0	0	0.0130719
59084	ENPP5	ENPP5	ectonucleotide pyrophosphatase/phosphodiesterase 5 (putative)	HGNC:13717	6p21.1-p11.2	hDG23L17	human	NM_021572	139.947	127.128	85.6645	0.490539	0.158704	-0.674491	117.58	0.803245	0.265717	0.40413	0	0	0	0	0.00326797
339221	ENPP7	ENPP7	ectonucleotide pyrophosphatase/phosphodiesterase 7	HGNC:23764	17q25.3	hDG24I03	human	NM_178543	48.5363	23.9492	24.4094	-0.748799	-1.27116	-0.0337245	32.2983	-1.578	0.0287848	0.184456	-1	0	-1	0	0.0130719
953	ENTPD1	ENTPD1	ectonucleoside triphosphate diphosphohydrolase 1	HGNC:3363	10q24.1	hDG27G04	human	NM_001776	43.299	131.321	201.157	-1.36628	0.247975	1.44138	125.259	1.01767	0.158572	0.342941	0	0	0	0	0.00653595
954	ENTPD2	ENTPD2	ectonucleoside triphosphate diphosphohydrolase 2	HGNC:3364	9q34	hDG27I04	human	NM_203468	1.4073	15.5014	24.3774	-2.74985	-1.78542	-1.4691	13.762	-2.09557	0.00369098	0.0722239	-1	-1	-1	-1	NA
956	ENTPD3	ENTPD3	ectonucleoside triphosphate diphosphohydrolase 3	HGNC:3365	3p21.3	hDG27B10	human	NM_001248	110.064	90.6427	134.935	0.83879	-0.466192	0.351105	111.881	0.644111	0.372127	0.463674	0	0	0	0	0.00326797
9583	ENTPD4	ENTPD4	ectonucleoside triphosphate diphosphohydrolase 4	HGNC:14573	8p21.3	hDG27F10	human	NM_004901	67.3867	141.49	125.956	-0.570723	0.426516	0.203271	111.611	0.636582	0.377754	0.46655	0	0	0	0	0.00980392
957	ENTPD5	ENTPD5	ectonucleoside triphosphate diphosphohydrolase 5	HGNC:3367	14q24.3	hDG27D10	human	NM_001249	104.042	162.959	117.538	0.639901	0.803438	0.0646772	128.18	1.09922	0.127745	0.319882	0	0	0	0	0.00653595
955	ENTPD6	ENTPD6	ectonucleoside triphosphate diphosphohydrolase 6 (putative)	HGNC:3368	20p11.21	hDG27J21	human	NM_001247	139.126	7.02684	19.3266	1.79864	-1.9342	-1.55225	55.1599	-0.939653	0.192971	0.365418	0	0	0	0	0.00653595
57089	ENTPD7	ENTPD7	ectonucleoside triphosphate diphosphohydrolase 7	HGNC:19745	10q23-q24	hDG27P10	human	NM_020354	53.5101	149.4	220.8	-1.02903	0.565382	1.76476	141.237	1.46379	0.0425735	0.213907	1	0	1	0	0.00980392
377841	ENTPD8	ENTPD8	ectonucleoside triphosphate diphosphohydrolase 8	HGNC:24860	9q34.3	hDG27K14	human	NM_198585	99.3291	43.185	57.4886	0.48425	-1.29939	-0.92396	66.6676	-0.618332	0.391572	0.471867	0	0	0	0	0.00326797
2033	EP300	EP300	E1A binding protein p300	HGNC:3373	22q13.2	DDRG16	human	NM_001429	157.787	191.436	106.703	0.742621	1.85199	-0.00870311	151.975	1.76364	0.014545	0.140327	1	0	1	0	0.0751634
2035	EPB41	EPB41	erythrocyte membrane protein band 4.1	HGNC:3377	1p33-p32	hDG10C19	human	NM_004437	88.6267	83.7035	140.052	1.04239	0.31885	2.5339	104.127	0.427628	0.553497	0.541366	0	0	0	0	NA
2038	EPB42	EPB42	erythrocyte membrane protein band 4.2	HGNC:3381	15q15-q21	hDG31E13	human	NM_000119	105.911	173.953	221.75	0.201816	1.12415	2.71192	167.204	2.18888	0.00242582	0.0584887	1	0	1	1	0.00980392
4072	TACSTD1	EPCAM	epithelial cell adhesion molecule	HGNC:11529	2p21	hDG06H04	human	NM_002354	41.5694	60.6829	60.2812	-0.424954	0.0171689	0.364225	54.1778	-0.967073	0.180247	0.356204	0	0	0	0	0.0130719
2041	EPHA1	EPHA1	EPH receptor A1	HGNC:3385	7q32-q36	K01J21	human	NM_005232	91.1313	83.285	101.566	-0.588992	-0.374717	-0.206094	91.994	0.0888374	0.90203	0.641216	0	0	0	0	0.0196078
284656	EPHA10	EPHA10	EPH receptor A10	HGNC:19987	1p34.3	K01C08	human	NM_001004338	175.675	122.319	159.149	1.56748	0.706609	1.23657	152.381	1.77497	0.0139217	0.138249	1	0	1	0	0.0196078
284656	EPHA10	EPHA10	EPH receptor A10	HGNC:19987	1p34.3	hDG07A12	human	NM_173641	96.3264	86.3237	82.7198	0.259896	0.966435	0.353941	88.4566	-0.00993475	0.989017	0.662612	0	0	0	0	0.0196078
1969	EPHA2	EPHA2	EPH receptor A2	HGNC:3386	1p36	K03M04	human	NM_004431	11.3409	9.09704	18.0816	-1.38188	-1.70089	-1.39011	12.8398	-2.12132	0.00329158	0.0678436	-1	-1	-1	0	0.0326797
2042	EPHA3	EPHA3	EPH receptor A3	HGNC:3387	3p11.2	K02N12	human	NM_005233	29.6965	50.2833	17.166	-1.27404	-1.06794	-1.58118	32.3819	-1.57566	0.0290224	0.184456	-1	0	-1	0	0.0359477
2043	EPHA4	EPHA4	EPH receptor A4	HGNC:3388	2q36.3	K01B11	human	NM_004438	180.889	84.8309	195.793	1.70048	-0.331892	2.15462	153.838	1.81565	0.0118879	0.128268	1	0	1	1	0.0261438
2044	EPHA5	EPHA5	EPH receptor A5	HGNC:3389	4q13.1	K01D11	human	NM_004439	126.885	174.493	132.227	0.322996	2.15195	0.562076	144.535	1.5559	0.0311007	0.188537	1	0	1	1	0.0392157
285220	EPHA6	EPHA6	EPH receptor A6	HGNC:19296	3q12.1	K02K03	human	NM_173655	35.4769	48.017	48.3595	-1.08668	-1.12415	-0.674491	43.9511	-1.25262	0.0826277	0.271958	0	0	0	0	0.0294118
2045	EPHA7	EPHA7	EPH receptor A7	HGNC:3390	6q16.3	K01F11	human	NM_004440	120.926	163.671	181.584	0.170998	1.85217	1.79864	155.394	1.85911	0.0100005	0.117412	1	0	1	0	0.0326797
2046	EPHA8	EPHA8	EPH receptor A8	HGNC:3391	1p36.12	K02P05	human	NM_020526	48.1936	35.5524	64.3367	-0.674491	-1.43329	-0.210087	49.3609	-1.10157	0.126924	0.319316	0	0	0	0	0.00653595
2047	EPHB1	EPHB1	EPH receptor B1	HGNC:3392	3q22.2	K01H11	human	NM_004441	135.824	155.169	110.166	0.550992	1.61664	0.00936793	133.72	1.25391	0.082317	0.2716	0	0	0	0	0.0294118
2048	EPHB2	EPHB2	EPH receptor B2	HGNC:3393	1p36.1-p35	hDG05P13	human	NM_004442	72.6927	70.1503	118.099	-0.706609	-0.674491	1.50957	86.9805	-0.0511511	0.943496	0.648781	0	0	0	0	0.00653595
2048	EPHB2	EPHB2	EPH receptor B2	HGNC:3393	1p36.1-p35	K02C22	human	NM_004442	85.1879	104.674	117.594	0.524604	0.281038	1.33792	102.485	0.381777	0.596801	0.555203	0	0	0	0	0.00653595
2049	EPHB3	EPHB3	EPH receptor B3	HGNC:3394	3q27.1	K03A15	human	NM_004443	109.586	292.655	152.15	0.230314	3.44088	1.11044	184.797	2.6801	0.000205411	0.0146554	1	1	1	1	0.0130719
2050	EPHB4	EPHB4	EPH receptor B4	HGNC:3395	7q22	K01J11	human	NM_004444	171.578	142.415	149.801	1.46298	1.26333	1.00237	154.598	1.83689	0.0109254	0.124796	1	0	1	0	0.00980392
2051	EPHB6	EPHB6	EPH receptor B6	HGNC:3396	7q33-q35	K01L11	human	NM_004445	69.1574	75.1691	125.123	-1.14948	-0.599547	0.384085	89.8164	0.0280326	0.969016	0.655558	0	0	0	0	0.0130719
2052	EPHX1	EPHX1	epoxide hydrolase 1	HGNC:3401	1q42.1	hDG11I09	human	NM_000120	31.0659	30.9544	62.4226	-1.11921	-0.836369	0.00812639	41.481	-1.3216	0.0670726	0.249841	0	0	0	0	0.00326797
2053	EPHX2	EPHX2	epoxide hydrolase 2	HGNC:3402	8p21	hDG11L03	human	NM_001979	83.7708	67.1826	45.3802	0.704139	0.584559	-0.690744	65.4445	-0.652482	0.365944	0.460458	0	0	0	0	0.0130719
79852	ABHD9	EPHX3	epoxide hydrolase 3	HGNC:23760	19p13.13	hDG11P11	human	NM_024794	101.768	85.5259	62.4226	1.32675	1.30402	0.00812639	83.2387	-0.155631	0.829262	0.623826	0	0	0	0	NA
253152	ABHD7	EPHX4	epoxide hydrolase 4	HGNC:23758	1p22.1	hDG11D15	human	NM_173567	55.9186	43.7948	43.0022	-0.25942	-0.332749	-0.78826	47.5719	-1.15153	0.110586	0.303101	0	0	0	0	NA
7957	EPM2A	EPM2A	epilepsy, progressive myoclonus type 2A, Lafora disease (laforin)	HGNC:3413	6q24	hDG27L05	human	NM_005670	91.4744	124.541	143.914	0.22483	0.128947	0.498938	119.977	0.870171	0.227928	0.382765	0	0	0	0	NA
29924	EPN1	EPN1	epsin 1	HGNC:21604	19q13.42	hDG20H16	human	NM_013333	246.741	117.806	69.9018	3.38651	0.383233	0.0503351	144.816	1.56375	0.0302917	0.186559	1	0	1	1	0.0130719
22905	EPN2	EPN2	epsin 2	HGNC:18639	17p11.2	hDG18C21	human	NM_014964	45.2977	42.6655	37.9779	-0.665731	-0.166433	-0.557188	41.9804	-1.30765	0.0700046	0.253984	0	0	0	0	0.00653595
55040	EPN3	EPN3	epsin 3	HGNC:18235	17q21.33	hDG18O03	human	NM_017957	76.4034	30.5495	88.5662	0.735808	-0.779606	1.96482	65.173	-0.660063	0.360408	0.457399	0	0	0	0	0.00980392
2056	EPO	EPO	erythropoietin	HGNC:3415	7q21	hDG09K15	human	NM_000799	87.4378	33.6096	39.2495	0.557188	-1.31007	-1.01553	53.4323	-0.987889	0.171058	0.34938	0	0	0	0	0.00653595
2057	EPOR	EPOR	erythropoietin receptor	HGNC:3416	19p13.2	hDG05G12	human	NM_000121	78.2747	78.539	91.8193	-0.529957	-0.430699	0.674491	82.8777	-0.165712	0.818388	0.620668	0	0	0	0	NA
2058	EPRS	EPRS	glutamyl-prolyl-tRNA synthetase	HGNC:3418	1q41	hDG23F18	human	NM_004446	81.9874	103.255	130.869	-0.994704	-0.42321	0.500429	105.37	0.462335	0.521767	0.528668	0	0	0	0	0.00653595
2060	EPS15	EPS15	epidermal growth factor receptor pathway substrate 15	HGNC:3419	1p32	hDG18L08	human	NM_001981	68.2382	35.7421	39.1544	0.367904	-0.516818	-0.498537	47.7116	-1.14763	0.111801	0.304543	0	0	0	0	0.00653595
79574	EPS8L3	EPS8L3	EPS8 like 3	HGNC:21297	1p13.2	hDG01A17	human	NM_024526	98.4089	74.5708	59.1086	1.47767	0.297827	-0.00418938	77.3627	-0.3197	0.657774	0.57744	0	0	0	0	0.00653595
85465	SELI	EPT1	ethanolaminephosphotransferase 1	HGNC:29361	2p23.3	hDG31J03	human	NM_033505	70.515	96.5727	82.6383	-0.477986	-0.0655755	-0.255841	83.242	-0.155537	0.829362	0.623826	0	0	0	0	NA
8288	EPX	EPX	eosinophil peroxidase	HGNC:3423	17q23.1	hDG25G12	human	NM_000502	167.017	75.107	126.298	0.600235	-0.824378	0.556455	122.807	0.949206	0.188451	0.361491	0	0	0	0	0.0130719
26284	ERAL1	ERAL1	Era like 12S mitochondrial rRNA chaperone 1	HGNC:3424	17q11.2	hDG04E19	human	NM_005702	68.2828	44.8453	22.1807	-0.204391	-0.523618	-1.8664	45.1029	-1.22046	0.0908254	0.281367	0	0	0	0	NA
51752	ARTS-1	ERAP1	endoplasmic reticulum aminopeptidase 1	HGNC:18173	5q15	hDG28J10	human	NM_016442	116.327	98.3957	99.4143	1.09801	-0.219209	0.866188	104.712	0.443955	0.538446	0.534246	0	0	0	0	0.00653595
64167	LRAP	ERAP2	endoplasmic reticulum aminopeptidase 2	HGNC:29499	5q15	hDG28P10	human	NM_022350	77.4806	138.843	85.7827	0.0156858	0.657628	0.411794	100.702	0.331986	0.645513	0.573265	0	0	0	0	0.00980392
2064	ERBB2	ERBB2	erb-b2 receptor tyrosine kinase 2	HGNC:3430	17q11.2-q12	hDG06L04	human	NM_001005862	161.421	101.941	31.2244	2.17418	0.909949	-0.472144	98.1956	0.261997	0.716605	0.595357	0	0	0	0	0.0196078
2064	ERBB2	ERBB2	erb-b2 receptor tyrosine kinase 2	HGNC:3430	17q11.2-q12	K01N11	human	NM_001005862	113.105	95.2657	148.306	-0.0284996	-0.0428248	0.964897	118.892	0.839892	0.244521	0.391701	0	0	0	0	0.0196078
2065	ERBB3	ERBB3	erb-b2 receptor tyrosine kinase 3	HGNC:3431	12q13	K02N06	human	NM_001982	48.1936	21.9547	47.5987	-0.674491	-1.77054	-0.696605	39.249	-1.38392	0.0551698	0.233016	0	0	0	0	0.0228758
2066	ERBB4	ERBB4	erb-b2 receptor tyrosine kinase 4	HGNC:3432	2q33.3-q34	K02P12	human	NM_005235	33.1647	94.4759	50.6419	-1.16162	0.0281038	-0.608147	59.4275	-0.82049	0.255593	0.398621	0	0	0	0	0.0424837
55914	ERBB2IP	ERBIN	erbb2 interacting protein	HGNC:15842	5p14.3-q12.3	hDG01K04	human	NM_018695	54.1644	68.1784	50.0047	-0.758802	-0.0262789	-0.506915	57.4492	-0.87573	0.224964	0.381196	0	0	0	0	NA
2067	ERCC1	ERCC1	ERCC excision repair 1, endonuclease non-catalytic subunit	HGNC:3433	19q13.32	hDG23E08	human	NM_001983	53.8053	91.3191	147.053	-1.71689	-0.714167	0.921079	97.3923	0.23957	0.739932	0.602117	0	0	0	0	NA
2067	ERCC1	ERCC1	ERCC excision repair 1, endonuclease non-catalytic subunit	HGNC:3433	19q13.32	DDRL14	human	NM_001166049 NM_001983 NM_202001	60.4818	72.3609	65.164	-0.994704	-0.624952	-0.966045	66.0022	-0.63691	0.377491	0.46655	0	0	0	0	NA
2068	ERCC2	ERCC2	ERCC excision repair 2, TFIIH core complex helicase subunit	HGNC:3434	19q13.3	DDRJ16	human	NM_000400 NM_001130867	88.3377	126.586	137.291	-0.497352	0.50301	0.696249	117.405	0.798357	0.268634	0.406293	0	0	0	0	0.00653595
2068	ERCC2	ERCC2	ERCC excision repair 2, TFIIH core complex helicase subunit	HGNC:3434	19q13.3	hDG23G08	human	NM_000400	111.233	135.809	77.2933	-0.245269	0.370309	-0.892068	108.112	0.538877	0.455259	0.501611	0	0	0	0	0.00653595
2071	ERCC3	ERCC3	ERCC excision repair 3, TFIIH core complex helicase subunit	HGNC:3435	2q21	DDRD17	human	NM_000122	154.352	76.7575	131.249	0.681304	-0.533496	0.556999	120.786	0.892776	0.216084	0.377367	0	0	0	0	0.0130719
2071	ERCC3	ERCC3	ERCC excision repair 3, TFIIH core complex helicase subunit	HGNC:3435	2q21	hDG23I08	human	NM_000122	141.01	140.149	95.1517	0.517791	0.476111	-0.427903	125.437	1.02264	0.156493	0.341243	0	0	0	0	0.0130719
2072	ERCC4	ERCC4	ERCC excision repair 4, endonuclease catalytic subunit	HGNC:3436	16p13.3	hDG23K08	human	NM_005236	55.4005	118.989	127.52	-1.67601	-0.0396759	0.413398	100.637	0.330159	0.647335	0.574068	0	0	0	0	0.0163399
2072	ERCC4	ERCC4	ERCC excision repair 4, endonuclease catalytic subunit	HGNC:3436	16p13.3	DDRH11	human	NM_005236	219.604	169.819	209.039	1.84633	1.40233	2.34984	199.488	3.09029	1.86004e-05	0.00297448	1	1	1	1	0.0163399
2073	ERCC5	ERCC5	ERCC excision repair 5, endonuclease	HGNC:3437	13q22-q34	DDRB13	human	NM_000123	187.169	91.0465	118.032	1.26723	-0.236262	0.25239	132.082	1.20819	0.0941344	0.28595	0	0	0	0	0.0196078
2073	ERCC5	ERCC5	ERCC excision repair 5, endonuclease	HGNC:3437	13q22-q34	hDG23M08	human	NM_000123	69.7574	123.872	67.248	-1.3081	0.0793519	-1.15316	86.9593	-0.0517433	0.942843	0.648735	0	0	0	0	0.0196078
2074	ERCC6	ERCC6	ERCC excision repair 6, chromatin remodeling factor	HGNC:3438	10q11	DDRI12	human	NM_000124	95.2063	147.836	173.92	-0.374717	0.945049	1.54045	138.988	1.401	0.0522419	0.229779	0	0	0	0	0.0130719
2074	ERCC6	ERCC6	ERCC excision repair 6, chromatin remodeling factor	HGNC:3438	10q11	hDG23H18	human	NM_000124	111.765	81.0105	145.937	-0.231643	-0.965448	0.892068	112.904	0.672686	0.351297	0.452291	0	0	0	0	0.0130719
54821	ERCC6L	ERCC6L	ERCC excision repair 6 like, spindle assembly checkpoint helicase	HGNC:20794	Xq13.1	DDRK04	human	NM_017669	153.208	135.745	99.9056	0.660865	0.693544	-0.165359	129.62	1.13942	0.114388	0.305753	0	0	0	0	0.00653595
1161	ERCC8	ERCC8	ERCC excision repair 8, CSA ubiquitin ligase complex subunit	HGNC:3439	5q12.1	DDRJ10	human	NM_000082	252.802	210.488	201.109	2.43907	2.2483	2.16707	221.466	3.70399	2.88611e-07	0.000148716	1	1	1	1	0.00653595
2069	EREG	EREG	epiregulin	HGNC:3443	4q21.21	hDG09I15	human	NM_001432	25.931	29.5046	27.4848	-1.63246	-1.47869	-1.45508	27.6401	-1.70806	0.0179512	0.151146	-1	0	-1	0	NA
2077	ERF	ERF	ETS2 repressor factor	HGNC:3444	19q13	hDG09M15	human	NM_006494	39.6602	26.9785	33.9757	-1.1437	-1.58246	-1.21257	33.5381	-1.54338	0.0324787	0.192364	-1	0	-1	0	NA
79956	KIAA1815	ERMP1	endoplasmic reticulum metallopeptidase 1	HGNC:23703	9p24	hDG11I15	human	NM_024896	95.7686	89.6532	54.8922	1.11921	1.46589	-0.300677	80.1047	-0.243139	0.736191	0.601394	0	0	0	0	0.00326797
2081	ERN1	ERN1	endoplasmic reticulum to nucleus signaling 1	HGNC:3449	17q23	K01K14	human	NM_001433	126.141	90.2415	132.227	0.303996	-0.182005	0.562076	116.203	0.764807	0.289267	0.420601	0	0	0	0	0.00980392
10595	ERN2	ERN2	endoplasmic reticulum to nucleus signaling 2	HGNC:16942	16p12.2	K02B17	human	NM_033266	101.373	80.8782	80.3138	1.04921	-0.309142	0.254316	87.5216	-0.036042	0.960169	0.653865	0	0	0	0	0.0163399
23071	TXNDC4	ERP44	endoplasmic reticulum protein 44	HGNC:18311	9q22.33	hDG22A09	human	NM_015051	126.175	164.35	100.206	0.961149	0.192712	0.532493	130.243	1.15685	0.108957	0.300977	0	0	0	0	0.00653595
90952	ESAM	ESAM	endothelial cell adhesion molecule	HGNC:17474	11q24.2	hDG02N07	human	NM_138961	60.8895	42.2042	67.6497	0.106499	-0.554284	0.5523	56.9145	-0.890659	0.217159	0.378034	0	0	0	0	0.00326797
2098	ESD	ESD	esterase D	HGNC:3465	13q14.1-q14.2	hDG11H15	human	NM_001984	80.3428	82.3158	83.8246	0.585547	1.17811	0.885777	82.1611	-0.18572	0.796914	0.615361	0	0	0	0	0.00326797
9700	ESPL1	ESPL1	extra spindle pole bodies like 1, separase	HGNC:16856	12q13.13	DDRA20	human	NM_012291	41.4023	29.8603	44.7722	-1.33536	-1.50903	-1.43601	38.6783	-1.39985	0.0524257	0.229779	0	0	0	0	0.0294118
2099	ESR1	ESR1	estrogen receptor 1	HGNC:3467	6q24-q27	hDG06C04	human	NM_000125	87.5961	87.4327	106.21	0.573194	0.596005	1.68623	93.7462	0.137761	0.848613	0.627212	0	0	0	0	0.00980392
2100	ESR2	ESR2	estrogen receptor 2	HGNC:3468	14q21-q22	hDG06E04	human	NM_001437	109.698	110.329	19.9766	1.0525	1.09145	-0.795899	80.0011	-0.246031	0.733186	0.600705	0	0	0	0	0.00326797
2101	ESRRA	ESRRA	estrogen related receptor alpha	HGNC:3471	11q12	hDG07C21	human	NM_004451	79.1151	77.4062	80.0938	-0.396031	0.442949	0.260447	78.8717	-0.277567	0.700526	0.589996	0	0	0	0	0.0130719
2103	ESRRB	ESRRB	estrogen related receptor beta	HGNC:3473	14q24.3	hDG06A10	human	NM_004452	144.788	132.091	167.135	1.81347	1.56237	3.4399	148.005	1.65278	0.0220202	0.162882	1	0	1	1	0.0130719
2104	ESRRG	ESRRG	estrogen related receptor gamma	HGNC:3474	1q41	hDG06C10	human	NM_206594	25.1638	42.5475	124.487	-0.780729	-0.375262	2.21233	64.0662	-0.690968	0.338382	0.446828	0	0	0	0	0.0130719
2108	ETFA	ETFA	electron transfer flavoprotein alpha subunit	HGNC:3481	15q23-q25	hDG26C03	human	NM_000126	89.0855	127.025	93.9168	-0.487406	-0.0917307	0.0140519	103.342	0.405707	0.574006	0.547319	0	0	0	0	0.00326797
2109	ETFB	ETFB	electron transfer flavoprotein beta subunit	HGNC:3482	19q13.41	hDG25I12	human	NM_001985	193.235	147.575	178.201	1.0829	1.07919	1.82113	173.004	2.3508	0.0011262	0.0404868	1	0	1	0	NA
254013	MGC50559	ETFBKMT	electron transfer flavoprotein beta subunit lysine methyltransferase	HGNC:28739	12p11.21	hDG31G19	human	NM_173802	219.841	212.338	123.63	2.38993	1.71433	0.618671	185.27	2.6933	0.000190641	0.0144935	1	1	1	1	NA
2110	ETFDH	ETFDH	electron transfer flavoprotein dehydrogenase	HGNC:3483	4q32-q35	hDG25K12	human	NM_004453	210.714	162.411	123.529	1.40467	1.46889	0.489006	165.552	2.14272	0.00299138	0.0639293	1	0	1	0	0.00326797
23474	ETHE1	ETHE1	ETHE1, persulfide dioxygenase	HGNC:23287	19q13.32	hDG11N03	human	NM_014297	44.3492	57.5523	40.6242	-0.659667	0.206844	-0.885777	47.5086	-1.15329	0.11004	0.302678	0	0	0	0	NA
55500	ETNK1	ETNK1	ethanolamine kinase 1	HGNC:24649	12p12.2	K02K12	human	NM_018638	59.7543	79.745	27.8174	-0.299774	-0.337245	-1.27158	55.7723	-0.922553	0.201146	0.369055	0	0	0	0	NA
55224	ETNK2	ETNK2	ethanolamine kinase 2	HGNC:25575	1q32.1	K02E12	human	NM_018208	66.6908	152.266	72.7057	-0.0749434	1.4614	0.0331717	97.2209	0.234783	0.744947	0.603932	0	0	0	0	0.00326797
64850	AGXT2L1	ETNPPL	ethanolamine-phosphate phospho-lyase	HGNC:14404	4q25	hDG31C20	human	NM_031279	86.0007	56.9688	53.8566	-0.180572	-0.674491	-0.86986	65.6087	-0.647898	0.36932	0.462136	0	0	0	0	NA
55194	C1ORF78	EVA1B	eva-1 homolog B	HGNC:25558	1p34.3	hDG09F12	human	NM_018166	76.1799	60.7657	90.3651	0.156404	-0.194565	0.894269	75.7702	-0.364166	0.613837	0.562365	0	0	0	0	NA
59271	C21ORF63	EVA1C	eva-1 homolog C	HGNC:13239	21q22.11	hDG09H12	human	NM_058187	39.3856	30.1362	49.7972	-1.15348	-1.45275	-0.621441	39.773	-1.36929	0.0577921	0.235512	0	0	0	0	NA
115704	EVI5L	EVI5L	ecotropic viral integration site 5 like	HGNC:30464	19p13.2	K01P18	human	NM_145245	111.988	22.6087	61.5564	-0.0569992	-2.05559	-1.20846	65.3843	-0.654163	0.364729	0.460458	0	0	0	0	0.00653595
2130	EWSR1	EWSR1	EWS RNA binding protein 1	HGNC:3508	22q12.2	hDG23A10	human	NM_005243	93.1539	103.798	105.197	-0.708556	-0.409985	-0.16681	100.716	0.332381	0.645112	0.573128	0	0	0	0	0.00653595
9156	EXO1	EXO1	exonuclease 1	HGNC:3511	1q43	DDRA12	human	NM_003686 NM_006027 NM_130398	183.353	141.974	158.815	1.19909	0.823107	1.19233	161.381	2.02627	0.00499419	0.0851923	1	0	1	0	0.00980392
9156	EXO1	EXO1	exonuclease 1	HGNC:3511	1q43	hDG23C10	human	NM_003686	111.765	92.4042	76.7353	-0.231643	-0.687716	-0.906574	93.6347	0.134649	0.851993	0.62793	0	0	0	0	0.00980392
9941	ENDOGL1	EXOG	endo/exonuclease (5'-3'), endonuclease G-like	HGNC:3347	3p21.3	hDG23H06	human	NM_005107	90.4952	194.947	140.356	-0.776686	1.81187	0.747017	141.933	1.48324	0.0398777	0.207325	1	0	1	0	NA
2131	EXT1	EXT1	exostosin glycosyltransferase 1	HGNC:3512	8q24.11	hDG31G13	human	NM_000127	81.5762	163.595	95.2848	-0.265548	0.964897	0.013955	113.485	0.68892	0.339805	0.447306	0	0	0	0	0.00653595
2132	EXT2	EXT2	exostosin glycosyltransferase 2	HGNC:3513	11p12-p11	hDG31I13	human	NM_000401	118.078	227.57	111.856	0.435498	1.94853	0.367481	152.502	1.77834	0.0137498	0.137668	1	0	1	0	0.00653595
2138	EYA1	EYA1	EYA transcriptional coactivator and phosphatase 1	HGNC:3519	8q13.3	hDG27I16	human	NM_000503	101.947	14.9364	33.9179	0.570723	-1.79534	-1.31202	50.2672	-1.07627	0.135905	0.327076	0	0	0	0	0.0294118
2139	EYA2	EYA2	EYA transcriptional coactivator and phosphatase 2	HGNC:3520	20q13.1	hDG27B14	human	NM_005244	88.5943	115.501	133.813	0.12971	-0.0297569	0.332626	112.636	0.66521	0.35667	0.455123	0	0	0	0	0.00653595
2140	EYA3	EYA3	EYA transcriptional coactivator and phosphatase 3	HGNC:3521	1p36	hDG27G16	human	NM_001990	85.4525	70.3037	55.805	0.025942	-0.823275	-0.951679	70.5204	-0.510754	0.479119	0.510789	0	0	0	0	0.00653595
2070	EYA4	EYA4	EYA transcriptional coactivator and phosphatase 4	HGNC:3522	6q23	hDG27K16	human	NM_004100	52.4628	36.9703	61.9783	-1.06362	-1.4085	-0.850043	50.4705	-1.07059	0.137962	0.328998	0	0	0	0	0.0163399
2145	EZH1	EZH1	enhancer of zeste 1 polycomb repressive complex 2 subunit	HGNC:3526	17q21.1-q21.3	hDG23E10	human	NM_001991	206.946	71.787	91.2452	2.20742	-1.19028	-0.529439	123.326	0.963694	0.181828	0.357302	0	0	0	0	0.00980392
2146	EZH2	EZH2	enhancer of zeste 2 polycomb repressive complex 2 subunit	HGNC:3527	7q35-q36	hDG23J06	human	NM_004456	175.042	95.6595	155.982	1.38986	-0.608364	1.15316	142.228	1.49147	0.0387842	0.206443	1	0	1	0	0.00326797
2159	F10	F10	coagulation factor X	HGNC:3528	13q34	hDG25M12	human	NM_000504	162.311	112.197	53.6332	0.513603	0.149887	-1.21408	109.38	0.574301	0.426195	0.49005	0	0	0	0	0.00980392
2160	F11	F11	coagulation factor XI	HGNC:3529	4q35	hDG28O12	human	NM_000128	79.1696	187.069	45.7401	0.0627433	1.70309	-0.922987	103.993	0.423868	0.557032	0.542477	0	0	0	0	0.00653595
50848	F11R	F11R	F11 receptor	HGNC:14685	1q21.2-q21.3	hDG03C18	human	NM_144503	68.1225	87.6231	137.204	0.618283	1.61489	3.1752	97.6499	0.246762	0.732414	0.600424	0	0	0	0	0.00326797
2161	F12	F12	coagulation factor XII	HGNC:3530	5q35.3	hDG28A14	human	NM_000505	70.7248	236.072	134.771	-0.172544	2.76541	2.04477	147.189	1.63001	0.0239385	0.170793	1	0	1	1	0.00326797
2162	F13A1	F13A1	coagulation factor XIII A chain	HGNC:3531	6p24.2-p23	hDG31H09	human	NM_000129	217.629	177.609	168.983	2.34744	1.18036	1.58622	188.074	2.77159	0.000123175	0.012418	1	1	1	1	NA
2147	F2	F2	coagulation factor II, thrombin	HGNC:3535	11p11.2	hDG28C14	human	NM_000506	60.0281	117.842	132.215	-0.470575	0.202347	1.95957	103.362	0.406244	0.573508	0.547199	0	0	0	0	0.00326797
2149	F2R	F2R	coagulation factor II thrombin receptor	HGNC:3537	5q13	hDG08L04	human	NM_001992	125.263	76.7188	110.316	1.14308	-0.585547	0.819634	104.099	0.426842	0.554223	0.541671	0	0	0	0	NA
2150	F2RL1	F2RL1	F2R like trypsin receptor 1	HGNC:3538	5q13	hDG08N04	human	NM_005242	96.5667	143.719	87.4315	0.149098	1.40087	0.0170757	109.239	0.570354	0.429358	0.49117	0	0	0	0	0.00326797
2151	F2RL2	F2RL2	coagulation factor II thrombin receptor like 2	HGNC:3539	5q13	hDG08M19	human	NM_004101	101.896	38.2188	80.6147	0.333695	-1.72699	-0.221984	73.5765	-0.42542	0.555547	0.542387	0	0	0	0	0.00326797
9002	F2RL3	F2RL3	F2R like thrombin/trypsin receptor 3	HGNC:3540	19p12	hDG08O19	human	NM_003950	80.989	65.7188	63.0858	-0.390495	-0.911674	-0.83671	69.9312	-0.527205	0.465074	0.505314	0	0	0	0	0.00980392
2152	F3	F3	coagulation factor III, tissue factor	HGNC:3541	1p22-p21	hDG05C22	human	NM_001993	81.3194	48.3397	56.4435	-0.433601	-1.30835	-0.449661	62.0342	-0.747706	0.300183	0.426667	0	0	0	0	NA
2153	F5	F5	coagulation factor V	HGNC:3542	1q23	hDG01D19	human	NM_000130	48.8972	56.7757	31.1901	-1.02505	-0.604414	-1.54588	45.621	-1.206	0.0947153	0.286194	0	0	0	0	0.0359477
2155	F7	F7	coagulation factor VII	HGNC:3544	13q34	hDG28E14	human	NM_000131	124.771	108.508	102.822	1.3333	0	0.979787	112.034	0.648387	0.368957	0.462072	0	0	0	0	0.00653595
2157	F8	F8	coagulation factor VIII	HGNC:3546	Xq28	hDG28G14	human	NM_000132	130.401	149.733	67.8914	1.49015	0.8937	-0.184597	116.008	0.75937	0.292725	0.422589	0	0	0	0	0.0130719
2158	F9	F9	coagulation factor IX	HGNC:3551	Xq26.3-q27.1	hDG25F06	human	NM_000133	96.4286	51.1412	33.564	-0.699243	-1.4539	-1.70309	60.3779	-0.793952	0.271289	0.408213	0	0	0	0	0.0163399
2166	FAAH	FAAH	fatty acid amide hydrolase	HGNC:3553	1p35-p34	hDG11K09	human	NM_001441	58.0611	47.922	67.9713	-0.1853	-0.170871	0.235665	57.9848	-0.860774	0.232982	0.384644	0	0	0	0	NA
158584	AMDD	FAAH2	fatty acid amide hydrolase 2	HGNC:26440	Xp11.1	hDG11B11	human	NM_174912	72.6299	79.1058	160.317	0.318715	1.05221	4.02257	104.018	0.424561	0.556359	0.542387	0	0	0	0	0.00326797
91442	C19ORF40	FAAP24	Fanconi anemia core complex associated protein 24	HGNC:28467	19q13.11	DDRD10	human	NM_152266	171.142	161.759	97.2622	0.981077	1.23466	-0.226281	143.388	1.52386	0.0347423	0.1978	1	0	1	0	NA
2167	FABP4	FABP4	fatty acid binding protein 4	HGNC:3559	8q21.13	hDG30K05	human	NM_001442	96.2844	87.3114	102.504	0.168623	-0.218218	0.250772	95.3666	0.183006	0.799819	0.616042	0	0	0	0	0.00653595
3992	FADS1	FADS1	fatty acid desaturase 1	HGNC:3574	11q12-q13.1	hDG01E19	human	NM_013402	100.165	74.5708	66.0882	1.56642	0.297827	0.381234	80.2745	-0.238397	0.741149	0.602232	0	0	0	0	NA
9415	FADS2	FADS2	fatty acid desaturase 2	HGNC:3575	11q12.2	hDG01G19	human	NM_004265	53.4621	78.5444	95.9791	-0.794302	0.499298	2.03185	75.9952	-0.357884	0.619967	0.564192	0	0	0	0	0.00326797
11124	FAF1	FAF1	Fas associated factor 1	HGNC:3578	1p32.3	hDG20D09	human	NM_007051	48.2222	152.236	43.3157	-1.32088	1.16503	-0.835563	81.2581	-0.210934	0.770092	0.60919	0	0	0	0	0.00326797
23197	UBXD8	FAF2	Fas associated factor family member 2	HGNC:24666	5q35.2	hDG20P22	human	NM_014613	64.8148	58.3966	62.6511	-0.927425	-0.965748	-0.191273	61.9542	-0.749941	0.298738	0.426192	0	0	0	0	0.00980392
2184	FAH	FAH	fumarylacetoacetate hydrolase	HGNC:3579	15q25.1	hDG11M09	human	NM_000137	58.0611	74.0613	61.2336	-0.1853	0.854355	-0.040632	64.452	-0.680196	0.345935	0.450515	0	0	0	0	0.00326797
84142	FAM175A	FAM175A	family with sequence similarity 175 member A	HGNC:25829	4q21.23	DDRC09	human	NM_139076	114.286	107.9	87.4439	-0.0340652	0.11432	-0.452562	103.21	0.40201	0.577499	0.548693	0	0	0	0	0.00326797
[truncated: 4,978 more rows]

## Sheet: UM-SCC-14A
Well_ID	Cell_line	Species	Gene_symbol	Accession_number	Gene_ID	Pct_normalization_control_Replicate_1	Pct_normalization_control_Replicate_2	Pct_normalization_control_Replicate_3	Plate_based_z_score_Replicate_1	Plate_based_z_score_Replicate_2	Plate_based_z_score_Replicate_3	Mean	Z_Score	P_value_2_tail	Q_value	Hits
SigmaHumKin1A05	UM-SCC-14A	human	FYN	NM_002037	2534	71.1365	58.2876	72.3158	-1.02228	-1.78084	-0.886629	67.2467	-1.24953	0.0457337	0.162465	0
SigmaHumKin1A06	UM-SCC-14A	human	PHKG2	NM_000294	5261	78.3581	75.005	75.5005	-0.638357	-0.816408	-0.699875	76.2879	-0.707845	0.257548	0.389313	0
SigmaHumKin1A07	UM-SCC-14A	human	MATK	NM_002378	4145	89.2897	92.0662	92.7224	-0.0572113	0.16786	0.310048	91.3594	0.19514	0.75491	0.661271	0
SigmaHumKin1A08	UM-SCC-14A	human	GALK2	NM_001001556	2585	78.4997	82.6495	77.603	-0.63083	-0.375395	-0.576581	79.5841	-0.51036	0.414283	0.479868	0
SigmaHumKin1A09	UM-SCC-14A	human	NTRK1	NM_001007792	4914	75.9226	85.0301	91.7639	-0.767835	-0.238056	0.253841	84.2389	-0.231475	0.711185	0.643259	0
SigmaHumKin1A10	UM-SCC-14A	human	EIF2AK4	NM_001013703	440275	62.6971	52.6534	52.8987	-1.47093	-2.10588	-2.02529	56.0831	-1.91838	0.00217361	0.0318448	-1
SigmaHumKin1A11	UM-SCC-14A	human	PDPK1	NM_002613	5170	60.5165	63.816	72.6559	-1.58686	-1.46191	-0.866684	65.6628	-1.34443	0.031597	0.141475	-1
SigmaHumKin1A12	UM-SCC-14A	human	BMPR2	NM_001204	659	57.4296	58.1553	60.1956	-1.75097	-1.78847	-1.59738	58.5935	-1.76797	0.0047181	0.0474322	-1
SigmaHumKin1A13	UM-SCC-14A	human	PIK4CB	NM_002651	5298	66.7186	70.9314	70.7699	-1.25714	-1.05141	-0.977286	69.4733	-1.11613	0.0742852	0.201185	0
SigmaHumKin1A14	UM-SCC-14A	human	CSNK1G2	NM_001319	1455	66.2371	54.9283	60.9995	-1.28274	-1.97464	-1.55024	60.7216	-1.64047	0.00873843	0.0677848	-1
SigmaHumKin1A15	UM-SCC-14A	human	PRKCB1	NM_212535	5579	63.7733	78.1262	76.3044	-1.41372	-0.636341	-0.652733	72.7346	-0.92073	0.140902	0.275365	0
SigmaHumKin1A16	UM-SCC-14A	human	ACVR2A	NM_001616	92	75.9509	78.9727	68.7911	-0.76633	-0.587509	-1.09333	74.5716	-0.810675	0.194777	0.332633	0
SigmaHumKin1A17	UM-SCC-14A	human	MAPK9	NM_002752	5601	70.9949	72.7566	85.7038	-1.0298	-0.946118	-0.101536	76.4851	-0.696029	0.265617	0.390958	0
SigmaHumKin1A18	UM-SCC-14A	human	CKM	NM_001824	1158	57.0048	46.3315	56.7945	-1.77355	-2.47059	-1.79683	53.3769	-2.08051	0.000887872	0.0183868	-1
SigmaHumKin1A19	UM-SCC-14A	human	RALB	NM_002881	5899	88.695	83.3372	100.545	-0.088828	-0.335719	0.768774	90.859	0.165159	0.791639	0.680326	0
SigmaHumKin1A20	UM-SCC-14A	human	TXK	NM_003328	7294	72.8074	66.8843	64.246	-0.933447	-1.28489	-1.35986	67.9792	-1.20564	0.0538748	0.173319	0
SigmaHumKin1A21	UM-SCC-14A	human	SYK	NM_003177	6850	69.409	63.4985	75.2841	-1.11411	-1.48022	-0.712567	69.3972	-1.12069	0.0731227	0.201185	0
SigmaHumKin1A22	UM-SCC-14A	human	PIP5K1B	NM_003558	8395	65.9539	62.7315	68.6983	-1.29779	-1.52447	-1.09877	65.7946	-1.33653	0.0326015	0.142383	-1
SigmaHumKin1B05	UM-SCC-14A	human	PRPF4B	NM_003913	8899	79.4626	79.5811	66.5958	-0.57964	-0.552411	-1.22206	75.2132	-0.772234	0.216805	0.358278	0
SigmaHumKin1B07	UM-SCC-14A	human	NPR2	NM_000907	4882	96.1148	103.07	87.3425	0.305629	0.802675	-0.00543944	95.5091	0.443761	0.477826	0.519583	0
SigmaHumKin1B09	UM-SCC-14A	human	AURKB	NM_004217	9212	56.3818	72.545	63.5039	-1.80667	-0.958326	-1.40338	64.1435	-1.43545	0.0217479	0.113281	-1
SigmaHumKin1B11	UM-SCC-14A	human	EPHA4	NM_004438	2043	79.1794	95.161	73.0888	-0.594696	0.346401	-0.8413	82.4764	-0.33707	0.589811	0.583896	0
SigmaHumKin1B13	UM-SCC-14A	human	NDUFA10	NM_004544	4705	70.0604	58.8431	68.0181	-1.07949	-1.74879	-1.13866	65.6405	-1.34576	0.0314275	0.141475	-1
SigmaHumKin1B15	UM-SCC-14A	human	MAP3K6	NM_004672	9064	83.1159	78.4701	77.4793	-0.385423	-0.616503	-0.583833	79.6885	-0.504106	0.420027	0.483855	0
SigmaHumKin1B17	UM-SCC-14A	human	AATK	NM_004920	9625	105.064	88.4159	98.1951	0.781386	-0.0427279	0.630975	97.225	0.546564	0.382008	0.462436	0
SigmaHumKin1B19	UM-SCC-14A	human	PIP5K2A	NM_005028	5305	85.863	78.232	82.4882	-0.239384	-0.630237	-0.290104	82.1944	-0.353966	0.57124	0.569979	0
SigmaHumKin1B21	UM-SCC-14A	human	MAP3K8	NM_005204	1326	63.1786	50.0876	53.3934	-1.44534	-2.2539	-1.99628	55.5532	-1.95013	0.00183335	0.0296015	-1
SigmaHumKin1C03	UM-SCC-14A	human	KIAA1639	AB046859	57729	90.8756	87.0404	87.4043	0.0271001	-0.12208	-0.00181315	88.4401	0.0202346	0.974177	0.740071	0
SigmaHumKin1C04	UM-SCC-14A	human	INSR	NM_000208	3643	92.3483	106.033	86.4149	0.105389	0.973586	-0.0598339	94.9319	0.409179	0.512816	0.537873	0
SigmaHumKin1C05	UM-SCC-14A	human	GRK6	NM_002082	2870	102.997	97.8326	99.0608	0.67148	0.500527	0.681743	99.9634	0.710628	0.255685	0.389313	0
SigmaHumKin1C06	UM-SCC-14A	human	PKLR	NM_000298	5313	91.4703	90.7436	93.4645	0.0587168	0.0915598	0.353564	91.8928	0.227096	0.716387	0.643259	0
SigmaHumKin1C07	UM-SCC-14A	human	MAP3K3	NM_002401	4215	100.816	91.9339	86.1367	0.555552	0.16023	-0.0761522	92.9622	0.291166	0.641397	0.611869	0
SigmaHumKin1C08	UM-SCC-14A	human	EPHA10	NM_001004338	284656	76.8005	57.494	70.3679	-0.721163	-1.82662	-1.00086	68.2208	-1.19117	0.0568445	0.174454	0
SigmaHumKin1C09	UM-SCC-14A	human	NTRK3	NM_002530	4916	80.9353	67.4927	92.877	-0.501351	-1.24979	0.319114	80.435	-0.459377	0.462537	0.508431	0
SigmaHumKin1C10	UM-SCC-14A	human	ALDH18A1	NM_001017423	5832	63.4051	55.3515	80.5403	-1.43329	-1.95022	-0.404332	66.4323	-1.29832	0.0379437	0.150382	-1
SigmaHumKin1C11	UM-SCC-14A	human	PFKFB1	NM_002625	5207	66.9168	102.356	94.0519	-1.2466	0.761473	0.388014	87.7749	-0.0196228	0.974969	0.740071	0
SigmaHumKin1C12	UM-SCC-14A	human	BUB1B	NM_001211	701	83.6823	92.5952	86.6004	-0.355312	0.19838	-0.048955	87.626	-0.0285423	0.963582	0.740071	0
SigmaHumKin1C13	UM-SCC-14A	human	PKM2	NM_002654	5315	102.968	100.16	105.152	0.669974	0.634815	1.03893	102.76	0.878194	0.160152	0.294618	0
SigmaHumKin1C14	UM-SCC-14A	human	DGKA	NM_001345	1606	108.094	93.1243	86.8787	0.94248	0.2289	-0.0326366	96.0324	0.475112	0.447325	0.498628	0
SigmaHumKin1C15	UM-SCC-14A	human	PRKCG	NM_002739	5582	107.669	113.36	116.128	0.919897	1.39629	1.6826	112.386	1.45489	0.0200217	0.108857	1
SigmaHumKin1C16	UM-SCC-14A	human	AKT2	NM_001626	208	85.4098	93.0714	98.8444	-0.263473	0.225848	0.669051	92.4419	0.259992	0.677492	0.632193	0
SigmaHumKin1C17	UM-SCC-14A	human	MAPK10	NM_002753	5602	96.9644	115.317	110.779	0.350795	1.50921	1.36893	107.687	1.17337	0.0606433	0.180514	0
SigmaHumKin1C18	UM-SCC-14A	human	CSNK1A1	NM_001892	1452	64.8778	87.2256	75.9334	-1.355	-0.111398	-0.674491	76.0122	-0.724359	0.246697	0.387173	0
SigmaHumKin1C19	UM-SCC-14A	human	GRK1	NM_002929	6011	98.7203	124.496	128.372	0.44414	2.03873	2.40061	117.196	1.74309	0.00535342	0.0524609	1
SigmaHumKin1C20	UM-SCC-14A	human	TYK2	NM_003331	7297	103.11	98.7849	98.7516	0.677502	0.555463	0.663612	100.215	0.725733	0.245722	0.387173	0
SigmaHumKin1C21	UM-SCC-14A	human	TEC	NM_003215	7006	97.7291	99.6313	107.038	0.391446	0.604295	1.14954	101.466	0.800663	0.200343	0.336741	0
SigmaHumKin1C22	UM-SCC-14A	human	DYRK3	NM_003582	8444	55.7304	59.9805	70.0897	-1.8413	-1.68317	-1.01718	61.9335	-1.56786	0.0122051	0.0855678	-1
SigmaHumKin1D03	UM-SCC-14A	human	CDK10	NM_003674	8558	92.1783	95.5049	90.7436	0.0963558	0.366239	0.194007	92.8089	0.281985	0.651923	0.619178	0
SigmaHumKin1D05	UM-SCC-14A	human	RPS6KA4	NM_003942	8986	90.734	100.372	96.1854	0.0195723	0.647023	0.513121	95.7638	0.459018	0.462799	0.508431	0
SigmaHumKin1D07	UM-SCC-14A	human	CLK1	NM_004071	1195	104.299	102.858	106.729	0.740735	0.790467	1.1314	104.629	0.990152	0.113301	0.248433	0
SigmaHumKin1D09	UM-SCC-14A	human	STK17B	NM_004226	9262	96.2564	93.1507	92.877	0.313156	0.230426	0.319114	94.0947	0.359019	0.565752	0.568764	0
SigmaHumKin1D11	UM-SCC-14A	human	EPHA5	NM_004439	2044	90.4225	79.7927	74.8821	0.00301112	-0.540203	-0.736138	81.6991	-0.383641	0.539447	0.552019	0
SigmaHumKin1D13	UM-SCC-14A	human	PIK3C2G	NM_004570	5288	92.858	88.5217	85.5492	0.132489	-0.0366239	-0.110602	88.9763	0.052359	0.933247	0.736491	0
SigmaHumKin1D15	UM-SCC-14A	human	DYRK1B	NM_004714	9149	67.7948	72.3334	63.9059	-1.19993	-0.970534	-1.37981	68.0113	-1.20372	0.0542575	0.173319	0
SigmaHumKin1D17	UM-SCC-14A	human	CDK5	NM_004935	1020	92.2916	93.1507	97.0511	0.102378	0.230426	0.563889	94.1645	0.363199	0.56124	0.566469	0
SigmaHumKin1D21	UM-SCC-14A	human	CRKL	NM_005207	1399	61.2245	74.9256	58.6496	-1.54922	-0.820986	-1.68804	64.9332	-1.38814	0.0264758	0.125954	-1
SigmaHumKin1E03	UM-SCC-14A	human	LOC442075	AK092352	442075	101.835	107.911	100.669	0.609752	1.08193	0.776027	103.472	0.920817	0.140838	0.275365	0
SigmaHumKin1E04	UM-SCC-14A	human	JAK3	NM_000215	3718	58.1942	44.3741	56.8254	-1.71032	-2.58351	-1.79502	53.1312	-2.09523	0.000816337	0.0181234	-1
SigmaHumKin1E05	UM-SCC-14A	human	GSK3B	NM_002093	2932	91.1871	73.5237	68.9766	0.0436612	-0.901864	-1.08245	77.8958	-0.611509	0.328092	0.429957	0
SigmaHumKin1E06	UM-SCC-14A	human	MVK	NM_000431	4598	106.084	83.8662	91.3929	0.835586	-0.305199	0.232083	93.7809	0.340216	0.586342	0.582865	0
SigmaHumKin1E07	UM-SCC-14A	human	MAP3K10	NM_002446	4294	93.2545	92.4894	96.7419	0.153567	0.192276	0.545757	94.1619	0.363047	0.561403	0.566469	0
SigmaHumKin1E08	UM-SCC-14A	human	CHEK2	NM_001005735	11200	75.6677	73.1798	69.564	-0.781386	-0.921702	-1.048	72.8039	-0.916583	0.14267	0.276427	0
SigmaHumKin1E09	UM-SCC-14A	human	PAK1	NM_002576	5058	96.9644	98.7584	101.658	0.350795	0.553937	0.834048	99.127	0.660517	0.290731	0.407832	0
SigmaHumKin1E10	UM-SCC-14A	human	MARVELD3	NM_001017967	91862	62.6122	72.4392	69.193	-1.47545	-0.96443	-1.06976	68.0814	-1.19952	0.0551056	0.173737	0
SigmaHumKin1E11	UM-SCC-14A	human	PHKA1	NM_002637	5255	82.2663	93.8384	98.3188	-0.43059	0.270102	0.638228	91.4745	0.202034	0.746566	0.658075	0
[truncated: 648 more rows]

## Sheet: UM-SCC-14C
Well_ID	Cell_line	Species	Gene_symbol	Accession_number	Gene_ID	Pct_normalization_control_Replicate_1	Pct_normalization_control_Replicate_2	Pct_normalization_control_Replicate_3	Pct_normalization_control_Replicate_4	Plate_based_z_score_Replicate_1	Plate_based_z_score_Replicate_2	Plate_based_z_score_Replicate_3	Plate_based_z_score_Replicate_4	Mean	Z_Score	P_value_2_tail	Q_value	Hits
[truncated: 713 more rows]

[truncated: 2 more sheets: PCI-15A, PCI-15B]
