# Supplementary material for: Functional Precision Medicine Identifies Novel Druggable Targets and Therapeutic Options in Head and Neck Cancer
Source: Oxford University Press journal article supplement (doi:10.1158/1078-0432.ccr-17-1339), 2018-03-29
Supplement: 10780432ccr171339-sup-183108_2_supp_4635984_p5t45t.xlsx [file 10780432ccr171339-sup-183108_2_supp_4635984_p5t45t.xlsx]

## Sheet: description
Supplementary file 5: Selection of gene targets for validation
header	description
Gene	gene symbol
Entrez Gene Name	etrex gene name
Gene_ID	gene id
Mean	mean of replicants percent normalized viability
Z_Score	library-based Z-score
P_value	library-based p-value
Q_value	FDR-corrected q-value
TOP.HITS	top 1% ESGs
PRED.COMP	genes with predicted compounds
SNP	genes with reported SNP by WGS
INDEL	genes with reported InDel by WGS
Kinome	genes which were also called ESGs in kinome siRNA screen of HNSCC cell lines
TCGA.OE	overexpressed in the TCGA HNSCC cohort analyzed
TCGA.AMP	amplified in the TCGA HNSCC cohort analyzed
Publication	previously published information available

## Sheet: selection
Gene	Entrez Gene Name	Gene_ID	Mean	Z_Score	P_value	Q_value	TOP.HITS	PRED.COMP	SNP	INDEL	Kinome	TCGA.OE	TCGA.AMP	Publication
WEE1	WEE1 G2 checkpoint kinase	7465	26.2665	-1.74642	0.015531	0.142908
MCL1	myeloid cell leukemia 1	4170	20.9848	-1.89389	0.00868907	0.111738
ST3GAL6	ST3 beta-galactoside alpha-2,3-sialyltransferase 6	10402	15.4957	-2.04716	0.00456283	0.0823929
CD2	CD2 molecule	914	20.2099	-1.91553	0.00795352	0.106625
CD300A	CD300a molecule	11314	15.9832	-2.03355	0.0048396	0.0845271
CKAP5	cytoskeleton associated protein 5	9793	11.8139	-2.14996	0.00289392	0.0622659
NGFR	nerve growth factor receptor	4804	20.9294	-1.89544	0.00863434	0.111738
TNFRSF9	tumor necrosis factor receptor superfamily member 9	3604	9.50417	-2.21446	0.00215407	0.0554977
TUBA1B	tubulin alpha 1b	10376	12.1205	-2.1414	0.00300795	0.0639885
UBA52	ubiquitin A-52 residue ribosomal protein fusion product 1	7311	21.1578	-1.88906	0.0088609	0.111836
UBB	ubiquitin B	7314	5.06626	-2.33837	0.00119626	0.0410942
UBC	ubiquitin C	7316	10.8139	-2.17789	0.00254899	0.0586393
ADCK5	aarF domain containing kinase 5	203054	23.1882	-1.83237	0.0111222	0.125354
GK2	glycerol kinase 2	2712	36.9392	-1.44841	0.0447609	0.216979
RPS6KL1	ribosomal protein S6 kinase like 1	83694	24.5453	-1.79448	0.0129077	0.133318
CHL1	cell adhesion molecule L1 like	10752	34.1334	-1.52676	0.0343922	0.19761
BCL2L1	BCL2 like 1	598	32.9812	-1.55893	0.0307723	0.18782
CHRNA1	cholinergic receptor nicotinic alpha 1 subunit	1134	21.703	-1.87384	0.00942382	0.11311
NSFL1C	NSFL1 cofactor	55968	36.4901	-1.46095	0.0429422	0.214828
PTGER4	prostaglandin E receptor 4	5734	28.6514	-1.67983	0.0199405	0.158347
PTK6	protein tyrosine kinase 6	5753	23.2161	-1.83159	0.0111568	0.125354
WISP2	WNT1 inducible signaling pathway protein 2	8839	32.1503	-1.58213	0.0283682	0.184456
BRDT	bromodomain testis associated	676	36.8312	-1.45143	0.0443175	0.216836
CCL5	C-C motif chemokine ligand 5	6352	32.4608	-1.57346	0.0292469	0.184456
CCT8	chaperonin containing TCP1 subunit 8	10694	25.2106	-1.7759	0.0138704	0.138249
CD7	CD7 molecule	924	27.4224	-1.71414	0.017547	0.151146
CEACAM7	carcinoembryonic antigen related cell adhesion molecule 7	1087	25.926	-1.75593	0.0149775	0.141781
CSF3	colony stimulating factor 3	1440	24.3869	-1.7989	0.012686	0.13198
CUL5	cullin 5	8065	31.5434	-1.59908	0.0267167	0.179046
DYNC1H1	dynein cytoplasmic 1 heavy chain 1	1778	29.8479	-1.64642	0.0225358	0.165131
ERF	ETS2 repressor factor	2077	33.5381	-1.54338	0.0324787	0.192364
FKBP5	FK506 binding protein 5	2289	29.3656	-1.65988	0.0214554	0.162882
GAN	gigaxonin	8139	31.1516	-1.61002	0.0256951	0.175335
GNS	glucosamine (N-acetyl)-6-sulfatase	2799	31.5335	-1.59935	0.0266908	0.179046
IL17B	interleukin 17B	27190	33.2694	-1.55088	0.0316452	0.190824
KIF22	kinesin family member 22	3835	34.7408	-1.5098	0.0364434	0.199475
KIRREL2	kin of IRRE like 2 (Drosophila)	84063	37.0016	-1.44667	0.045018	0.216979
KLHL18	kelch like family member 18	23276	29.7134	-1.65017	0.0222296	0.163636
MAP3K14	mitogen-activated protein kinase kinase kinase 14	9020	29.4475	-1.6576	0.0216369	0.162882
MARK2	microtubule affinity regulating kinase 2	2011	26.2111	-1.74796	0.0154399	0.142635
MMD	monocyte to macrophage differentiation associated	23531	30.8576	-1.61822	0.0249508	0.173479
NSD1	nuclear receptor binding SET domain protein 1	64324	35.0699	-1.50061	0.0375996	0.201816
PLA2R1	phospholipase A2 receptor 1	22925	25.9329	-1.75573	0.0149888	0.141781
RND3	Rho family GTPase 3	390	30.1625	-1.63763	0.0232656	0.168727
SIGLEC1	sialic acid binding Ig like lectin 1	6614	30.5239	-1.62754	0.0241299	0.17123
SORL1	sortilin-related receptor, L(DLR class) A repeats containing	6653	29.5573	-1.65453	0.0218789	0.162882
TUBB2B	tubulin beta 2B class IIb	347733	29.621	-1.65275	0.0220218	0.162882
VRK3	vaccinia related kinase 3	51231	35.5135	-1.48822	0.0392041	0.206681
VSIG2	V-set and immunoglobulin domain containing 2	23584	35.02	-1.502	0.0374234	0.201103
AURKA	aurora kinase A	6790	14.4549	-2.07622	0.00401948	0.0760364
MPP3	membrane palmitoylated protein 3	4356	14.8077	-2.06637	0.00419657	0.0781596
EPHA2	EPH receptor A2	1969	12.8398	-2.12132	0.00329158	0.0678436
TP53	tumor protein p53	7157	18.1786	-1.97225	0.00628353	0.0961822
SIGLEC5	sialic acid binding Ig like lectin 5	8778	10.869	-2.17635	0.00256693	0.0586393
CASR	calcium sensing receptor	846	16.6348	-2.01535	0.00523311	0.0879303
CLEC1B	C-type lectin domain family 1 member B	51266	16.2486	-2.02614	0.00499669	0.0851923
CNGB3	cyclic nucleotide gated channel beta 3	54714	19.2732	-1.94168	0.00713991	0.102247
GPR162	G protein-coupled receptor 162	27239	19.215	-1.94331	0.00709141	0.102247
PLCH1	phospholipase C eta 1	23007	20.9723	-1.89424	0.0086764	0.111738
PSMA2	proteasome subunit alpha 2	5683	11.8309	-2.14949	0.00290013	0.0622659
PSMB4	proteasome subunit beta 4	5692	6.6414	-2.29439	0.00147863	0.0445272
PSMC2	proteasome 26S subunit, ATPase 2	5701	7.32057	-2.27543	0.00161834	0.0469069
CD300LB	CD300 molecule like family member b	124599	13.5409	-2.10174	0.00359139	0.0714955
CENPE	centromere protein E	1062	19.0401	-1.94819	0.00694885	0.101614
CHRNB2	cholinergic receptor nicotinic beta 2 subunit	1141	20.9941	-1.89363	0.008698	0.111738
DSG4	desmoglein 4	147409	19.4359	-1.93714	0.00727521	0.102973
ENTPD2	ectonucleoside triphosphate diphosphohydrolase 2	954	13.762	-2.09557	0.00369098	0.0722239
FGF4	fibroblast growth factor 4	2249	20.9415	-1.8951	0.00864612	0.111738
GABBR2	gamma-aminobutyric acid type B receptor subunit 2	9568	16.9885	-2.00548	0.00545868	0.0907342
GPT2	glutamic pyruvate transaminase (alanine aminotransferase) 2	84706	17.2491	-1.9982	0.00563052	0.0912934
IK	IK cytokine, down-regulator of HLA II	3550	9.72765	-2.20822	0.00221723	0.0561884
KCTD2	potassium channel tetramerization domain containing 2	23510	19.2781	-1.94155	0.00714348	0.102247
KIF11	kinesin family member 11	3832	15.1187	-2.05769	0.00435876	0.0806133
KREMEN1	kringle containing transmembrane protein 1	83999	14.3021	-2.08049	0.00394469	0.0755935
LOC728683*	record withdrawn by NCBI	728683	13.6397	-2.09898	0.0036355	0.0719726
NDC80	NDC80 kinetochore complex component	10403	21.3303	-1.88425	0.0090357	0.111836
NR5A1	nuclear receptor subfamily 5 group A member 1	2516	20.8939	-1.89643	0.00859951	0.111738
NUF2	NUF2, NDC80 kinetochore complex component	83540	15.2064	-2.05524	0.00440542	0.0810725
NUP107	nucleoporin 107kDa	57122	18.62	-1.95993	0.00661684	0.0983521
PCDHA10	protocadherin alpha 10	56139	15.9588	-2.03423	0.00482532	0.0845271
PCDHAC1	protocadherin alpha subfamily C, 1	56135	17.6065	-1.98822	0.00587395	0.0929715
PDE5A	phosphodiesterase 5A	8654	18.5659	-1.96143	0.00657516	0.0980468
PLA2G10	phospholipase A2 group X	8399	13.1791	-2.11185	0.0034337	0.0696285
PRPH2	peripherin 2 (retinal degeneration, slow)	5961	21.2836	-1.88555	0.00898837	0.111836
PSMA1	proteasome subunit alpha 1	5682	10.59	-2.18414	0.00247712	0.0584887
PSMA3	proteasome subunit alpha 3	5684	19.0631	-1.94755	0.00696776	0.101614
PSMA4	proteasome subunit alpha 4	5685	5.14414	-2.3362	0.00120896	0.0412251
PSMA6P1*	proteasome subunit alpha 6 pseudogene 1	5687	10.9072	-2.17528	0.00257948	0.0586393
PSMB1	proteasome subunit beta 1	5689	14.1913	-2.08358	0.00389137	0.0748812
PSMB3	proteasome subunit beta 3	5691	5.84513	-2.31663	0.00132899	0.0428002
PSMB5	proteasome subunit beta 5	5693	20.971	-1.89428	0.00867516	0.111738
PSMB7	proteasome subunit beta 7	5695	21.3896	-1.88259	0.00909662	0.111836
PSMD1	proteasome 26S subunit, non-ATPase 1	5707	4.18945	-2.36286	0.00106156	0.0390718
PSMD14	proteasome 26S subunit, non-ATPase 14	10213	8.5752	-2.2404	0.00190887	0.0514679
PSMD3	proteasome 26S subunit, non-ATPase 3	5709	21.3081	-1.88487	0.00901306	0.111836
PSMD7	proteasome 26S subunit, non-ATPase 7	5713	17.8289	-1.98201	0.00603017	0.0944769
PSMD8	proteasome 26S subunit, non-ATPase 8	5714	6.90227	-2.28711	0.00153092	0.0451947
RAN	RAN, member RAS oncogene family	5901	6.94569	-2.2859	0.00153978	0.0451947
SORCS2	sortilin related VPS10 domain containing receptor 2	57537	13.8277	-2.09374	0.00372091	0.0723862
SPAST	spastin	6683	21.1773	-1.88852	0.00888063	0.111836
SPHK2	sphingosine kinase 2	56848	20.5365	-1.90641	0.00825636	0.109305
TAPBP	TAP binding protein (tapasin)	6892	20.4729	-1.90819	0.0081965	0.109229
TRIM35	tripartite motif containing 35	23087	13.6654	-2.09827	0.0036471	0.0719726
TUBA1C	tubulin alpha 1c	84790	16.3078	-2.02449	0.00503212	0.0854822
TUBA8	tubulin alpha 8	51807	16.9617	-2.00623	0.00544125	0.0907342
UBAP1	ubiquitin associated protein 1	51271	20.6352	-1.90366	0.00834993	0.110009
USP41	ubiquitin specific peptidase 41	373856	20.6768	-1.90249	0.00838959	0.110218
ATM	ATM serine/threonine kinase	472	NA	NA	NA	NA
CDC25A	cell division cycle 25A	993	NA	NA	NA	NA
CDC25B	cell division cycle 25B	994	NA	NA	NA	NA
CDC25C	cell division cycle 25C	995	NA	NA	NA	NA
CDK1	cyclin-dependent kinase 1	983	NA	NA	NA	NA
CDK2	cyclin-dependent kinase 2	1017	NA	NA	NA	NA
CHEK2	checkpoint kinase 2	11200	NA	NA	NA	NA
MYT1	myelin transcription factor 1	4661	NA	NA	NA	NA
NEK2	NIMA related kinase 2	4751	NA	NA	NA	NA
NEK4	NIMA related kinase 4	6787	NA	NA	NA	NA
NEK6	NIMA related kinase 6	10783	NA	NA	NA	NA
PPP2CA	protein phosphatase 2 catalytic subunit alpha	5515	NA	NA	NA	NA
PRKDC	protein kinase, DNA-activated, catalytic polypeptide	5591	NA	NA	NA	NA
WEE2	WEE1 homolog 2 (S. pombe)	494551	NA	NA	NA	NA
EPHA3	EPH receptor A3	2042	32.3819	-1.57566	0.0290224	0.184456
TP53RK	TP53 regulating kinase	112858	31.7635	-1.59293	0.0273059	0.181481
CERKL	ceramide kinase like	375298	29.2959	-1.66183	0.0213028	0.162487
CHEK1	checkpoint kinase 1	1111	32.6383	-1.5685	0.0297606	0.18476
LINC01529*	long intergenic non-protein coding RNA 1529	400687	26.5354	-1.73891	0.0159807	0.145315
LTK	leukocyte receptor tyrosine kinase	4058	28.0551	-1.69648	0.0187449	0.15468
PI4K2A	phosphatidylinositol 4-kinase type 2 alpha	55361	25.2665	-1.77434	0.0139544	0.138278
PIM3	Pim-3 proto-oncogene, serine/threonine kinase	415116	27.7594	-1.70473	0.0181768	0.151884
PIP5K1C	phosphatidylinositol-4-phosphate 5-kinase type 1 gamma	23396	31.1566	-1.60988	0.0257093	0.175335
RET	ret proto-oncogene	5979	35.9306	-1.47658	0.0407648	0.209124
UCK2	uridine-cytidine kinase 2	7371	24.9382	-1.78351	0.0134683	0.137274
WEE2-AS1	WEE2 antisense RNA 1	285962	34.6252	-1.51302	0.0360453	0.199475
DNAH5	dynein axonemal heavy chain 5	1767	22.7685	-1.84409	0.0106169	0.122174
ABCA7	ATP binding cassette subfamily A member 7	10347	28.0437	-1.69679	0.0187234	0.15468
ACTR6	ARP6 actin-related protein 6 homolog	64431	30.9042	-1.61692	0.0250677	0.173606
AQP7	aquaporin 7	364	26.825	-1.73082	0.0164781	0.147886
CDH23	cadherin-related 23	64072	26.8299	-1.73068	0.0164866	0.147886
CLCN4	chloride voltage-gated channel 4	1183	27.6622	-1.70745	0.0179932	0.151146
GABRP	gamma-aminobutyric acid type A receptor pi subunit	2568	27.5673	-1.7101	0.0178162	0.151146
SORCS3	sortilin related VPS10 domain containing receptor 3	22986	30.8385	-1.61876	0.0249037	0.173411
ATRN	attractin	8455	32.5993	-1.56959	0.0296464	0.184486
FAT2	FAT atypical cadherin 2	2196	33.9896	-1.53077	0.0339224	0.1964
A2M	alpha-2-macroglobulin	2	36.7863	-1.45268	0.0441343	0.216799
ABCB10	ATP binding cassette subfamily B member 10	23456	33.3096	-1.54976	0.0317688	0.190841
AHR	aryl hydrocarbon receptor	196	27.2654	-1.71853	0.0172606	0.151146
ATP1A2	ATPase Na+/K+ transporting subunit alpha 2	477	30.559	-1.62656	0.0242146	0.171444
ATP1B3	ATPase Na+/K+ transporting subunit beta 3	483	33.8261	-1.53534	0.0333939	0.194464
CLDN18	claudin 18	51208	32.6883	-1.56711	0.0299056	0.184918
COL8A1	collagen type VIII alpha 1	1295	36.2233	-1.4684	0.0418925	0.211401
CPM	carboxypeptidase M	1368	35.8365	-1.4792	0.0404074	0.208212
CTNND2	catenin delta 2	1501	28.9119	-1.67255	0.0204803	0.159627
DNAH11	dynein axonemal heavy chain 11	8701	31.0181	-1.61374	0.025355	0.174451
FBXL18	F-box and leucine-rich repeat protein 18	80028	23.5442	-1.82243	0.0115678	0.126823
FBXO28	F-box protein 28	23219	30.3577	-1.63218	0.0237285	0.170607
FCRL6	Fc receptor like 6	343413	27.0835	-1.7236	0.0169338	0.149891
GGH	gamma-glutamyl hydrolase	8836	36.1637	-1.47007	0.0416608	0.210905
GJC3	gap junction protein gamma 3	349149	28.155	-1.69369	0.0189401	0.155074
GZF1	GDNF inducible zinc finger protein 1	64412	31.8453	-1.59065	0.0275276	0.182372
HHAT	hedgehog acyltransferase	55733	35.4616	-1.48967	0.0390144	0.206681
HNF4G	hepatocyte nuclear factor 4 gamma	3174	25.7352	-1.76125	0.0146756	0.140327
IKBKAP	inhibitor of kappa light polypeptide gene enhancer in B-cells, kinase complex-associated protein	8518	33.2832	-1.5505	0.0316884	0.190824
JAG1	jagged 1	182	21.9437	-1.86712	0.00968269	0.115138
KCTD3	potassium channel tetramerization domain containing 3	51133	32.3184	-1.57743	0.0288412	0.184456
LAMB1	laminin subunit beta 1	3912	36.3856	-1.46387	0.0425283	0.213907
MAL2	mal, T-cell differentiation protein 2 (gene/pseudogene)	114569	30.4094	-1.63074	0.0238522	0.170703
MAP3K11	mitogen-activated protein kinase kinase kinase 11	4296	34.5605	-1.51483	0.0358252	0.199475
MSL2	male-specific lethal 2 homolog (Drosophila)	55167	35.0987	-1.4998	0.0377004	0.202124
MTMR12	myotubularin related protein 12	54545	36.4659	-1.46163	0.0428459	0.21481
NECTIN3	nectin cell adhesion molecule 3	25945	21.6115	-1.87639	0.00932749	0.112942
PCMTD1	protein-L-isoaspartate (D-aspartate) O-methyltransferase domain containing 1	115294	28.7381	-1.67741	0.0201178	0.158953
PSMA7	proteasome subunit alpha 7	5688	27.6944	-1.70655	0.018055	0.151146
PSMD2	proteasome 26S subunit, non-ATPase 2	5708	36.1434	-1.47063	0.0415874	0.210905
PTPRVP*	protein tyrosine phosphatase, receptor type V, pseudogene	148713	21.4392	-1.88121	0.00914801	0.111836
TPX2	TPX2, microtubule nucleation factor	22974	22.8897	-1.8407	0.0107609	0.123524
ZBTB10	zinc finger and BTB domain containing 10	65986	34.6903	-1.51121	0.0362688	0.199475
LAMA3	laminin subunit alpha 3	3909	31.8636	-1.59013	0.0275777	0.182443
SLC38A2	solute carrier family 38 member 2	54407	29.4971	-1.65621	0.0217454	0.162882
* not tested due to no siRNA
