# Supplementary material for: Functional Precision Medicine Identifies Novel Druggable Targets and Therapeutic Options in Head and Neck Cancer
Source: Oxford University Press journal article supplement (doi:10.1158/1078-0432.ccr-17-1339), 2018-03-29
Supplement: 10780432ccr171339-sup-183108_2_supp_4635985_p5t45t.xlsx [file 10780432ccr171339-sup-183108_2_supp_4635985_p5t45t.xlsx]

## Sheet: description
Supplementary file 8: Drug library information and screen results
file	description
drug library	drug identifiers and PubChem IDs used in each screen
screen 1	drug screen result 1
screen 2	drug screen result 2

## Sheet: drug library
drug	pubchem_id	screen_id
UMI-77	CID:992586	2
Cyclic Pifithrin-α hydrobromide	CID:11515812	2
RITA	CID:374536	2
Nutlin-3	CID:216345	2
RETRA hydrochloride	CID:46861546	2
VX-680 (Tozasertib, MK-0457)	CID:5494449	2
Alisertib (MLN8237)	CID:24771867	2
PF 477736	CID:16750408	2
Bortezomib (PS-341)	CID:387447	2
Epothilone B (EPO906, Patupilone)	CID:448013	2
UNC 3230	CID:46355372	2
Dasatinib Monohydrate	CID:115400687	2
Roscovitine (Seliciclib,CYC202)	CID:46881287	2
PD 0332991 isethionate (Palbociclib)	CID:11478676	2
Olaparib (AZD2281, Ku-0059436)	CID:23725625	2
Talazoparib (BMN 673)	CID:53345055	2
PF-5006739		2
(?)-Bay K 8644	CID:78442431	1
importazole	CID:2949965	1
SR8278	CID:53393127	1
Floxuridine	CID:5702211	1
BXL 628	CID:3099980	1
BRD-A05821830;Docetaxel	CID:9877265	1
SB 218078;SB-218078	CID:3387354	1
Melphalan;Melphalan (BAN, FDA, INN, JAN, USAN, USP);Melphalan Hydrochloride (FDA)	CID:4053	1
cyclophosphamide	CID:2907	1
GSK429286A	CID:11373846	1
Valinomycin,_Streptomyces_fulvissimus	CID:5649	1
Nutlin-3	CID:216345	1
Actimid;CC-4047;Pomalidomide	CID:134780	1
Cladribine;Cladribine (BAN, FDA, INN, USAN)	CID:1546	1
CC-5013;Lenalidomide;Lenalidomide (BAN, FDA, INN, USAN);Revlimid	CID:216326	1
CC-5013;Lenalidomide;Lenalidomide (BAN, FDA, INN, USAN);Revlimid	CID:216326	1
Mitotane;o;p'-DDD	CID:4211	1
SB 203580	CID:176155	1
TGX-221	CID:9907093	1
AG-690/36107028	CID:3099980	1
Salubrinal	CID:5717801	1
NSC401077	CID:344265	1
Nigericin	CID:6708472	1
ifosfamide	CID:3690	1
SKF-96365, Hydrochloride	CID:104956	1
EX 527	CID:5113032	1
NSC 23766	CID:409805	1
CCR2 Antagonist	CID:22143221	1
BRD-A85667082;Fulvestrant	CID:104741	1
Perifosine (KRX-0401)	CID:148178	1
Tie2 kinase inhibitor	CID:23625762	1
thalidomide;Thalidomide (BAN, FDA, INN, USAN, USP)	CID:5426	1
Vinorelbine Tartrate	CID:60780	1
Vinblastine (BAN, INN);Vinblastine Sulfate;Vinblastine Sulfate (FDA, USP, JAN, USAN)	CID:13342	1
SP600125	CID:8515	1
NVP-231	CID:4096211	1
Olaparib (AZD2281)	CID:23725625	1
Parbendazole	CID:26596	1
Celecoxib	CID:2662	1
azacitidine;Azacitidine (FDA, INN, USAN)	CID:9444	1
AY 9944	CID:9705	1
BIBR1532	CID:9927531	1
GSK-3 inhibitor IX	CID:5287844	1
ML-030	CID:17757146	1
HA-1004	CID:3546	1
WP1066	CID:11210478	1
p38 MAP Kinase Inhibitor VI, JX401	CID:1126109	1
BRD9647	CID:1242560	1
CC-5013;Lenalidomide;Lenalidomide (BAN, FDA, INN, USAN);Revlimid	CID:216326	1
Fasentin	CID:879520	1
GSK1059615	CID:23582824	1
AA-COCF3	CID:5280436	1
Myoseverin	CID:4273	1
Roscovitine(CYC202)	CID:160355	1
SID 26681509	CID:44456237	1
SMER28	CID:1560402	1
Cdk/Crk Inhibitor	CID:9549301	1
Irinotecan (BAN, INN);Irinotecan HCl;Irinotecan Hydrochloride (FDA, JAN, USAN)	CID:60838	1
ERK Inhibitor II, Negative control	CID:16760417	1
FGF/PDGF/VEGF RTK Inhibitor	CID:5410621	1
FGF Receptor Tyrosine Kinase Inhibitor	CID:5328127	1
Clioquinol	CID:2788	1
STAT5 Inhibitor	CID:5839940	1
Forskolin	CID:47936	1
PRL-3 Inhibitor I	CID:73707371	1
BRD-K09951645;Dabrafenib mesylate	CID:44462760	1
Uracil mustard	CID:6194	1
Iniparib (BSI-201)	CID:9796068	1
carboplatin;Carboplatin (BAN, JAN, USAN, USP, FDA, INN)	CID:2567	1
BEZ235 (NVP-BEZ235)	CID:11977753	1
SL327	CID:9549284	1
BRD-K12343256;GSK1120212;TRAMETINIB	CID:11707110	1
Fedratinib (SAR302503, TG101348)	CID:16722836	1
PCI-24781	CID:11749858	1
procarbazine;Procarbazine HCl	CID:4915	1
Ciclopirox ethanolamine	CID:2749	1
Midostaurin hydrate	CID:9829523	1
gemcitabine;Gemcitabine (BAN, INN, USAN);Gemcitabine HCl;Gemcitabine Hydrochloride;Gemcitabine Hydrochloride (USP, USAN, FDA);Gemzar	CID:60750	1
Carfilzomib	CID:11556711	1
Pipobroman	CID:4842	1
PLX-4720	CID:24180719	1
MGCD0103 (Mocetinostat)?	CID:9865515	1
BRD-K16730910;Regorafenib	CID:11167602	1
Alsterpaullone	CID:5005498	1
indisulam	CID:216468	1
PD168393	CID:4708	1
HA14-1	CID:6976314	1
GSK-3b Inhibitor XI	CID:10020713	1
Saracatinib (AZD0530)	CID:10302451	1
BRD-K19687926;GW-57201;Lapatinib;Lapatinib (INN);lapatinib ditosylate;Lapatinib Ditosylate (FDA, USAN);Tykerb;Tyverb	CID:208908	1
LDE225 (NVP-LDE225, Erismodegib)	CID:24775005	1
MST-312;Telomerase Inhibitor IX	CID:10385095	1
PKR Inhibitor	CID:6490494	1
SIRT1/2 Inhibitor IV, Cambinol	CID:3246390	1
Marimastat	CID:119031	1
Mitoxantrone;Mitoxantrone (FDA, INN);Mitoxantrone Hydrochloride (FDA, USP, JAN, USAN);Mitozantrone (BAN)	CID:4212	1
Rofecoxib (Vioxx)	CID:5090	1
BML-EI388 (BML-277);C3742;Chk2 Inhibitor II	CID:9969021	1
Busulfan;Busulfan (BAN, FDA, INN, JAN, USP)	CID:2478	1
BRD-K23984367;Sorafenib;Sorafenib (USAN, INN);Sorafenib Tosylate (FDA, USAN)	CID:216239	1
PI 3-Kalpha Inhibitor IV	CID:9901372	1
SD-208	CID:10316032	1
BRD-K69172251;Cisplatin;Cisplatin (BAN, FDA, INN, JAN, USAN, USP)	CID:2767	1
BRD-K69172251;Cisplatin;Cisplatin (BAN, FDA, INN, JAN, USAN, USP)	CID:2767	1
BI-87G3	CID:44156976	1
fluorouracil	CID:3385	1
GSK690693	CID:16725726	1
OSI-930	CID:9868037	1
CD-1530	CID:24868309	1
Necrostatin-7	CID:1239801	1
GP_70	CID:613753	1
Imiquimod	CID:57469	1
cytochalasin_B	CID:5311281	1
BIX01294	CID:25150857	1
Chk2 Inhibitor	CID:25809075	1
H 89 2HCl	CID:449241	1
Lomeguatrib	CID:3025944	1
Akt Inhibitor IV	CID:2326992	1
TW-37	CID:11455910	1
HNF4a napthofuran agonist "Compound 5"	CID:55508	1
chlorambucil	CID:2708	1
Axitinib;Axitinib (FDA, INN, USAN);BRD-K29905972	CID:6450551	1
NH125	CID:10436840	1
PIM1/2 Kinase Inhibitor VI	CID:6076476	1
VEGF Receptor 2 Kinase Inhibitor I	CID:6419834	1
Temozolomide;Temozolomide (BAN, FDA, INN, USAN)	CID:5394	1
GSK-J1 (sodium salt)	CID:56963315	1
Ara-C;BRD-K33106058;Cytarabine (BAN, FDA, INN, JAN, USAN, USP);Cytarabine HCl;Cytarabine Hydrochloride (USAN)	CID:6253	1
AMD3100;CXCR4 Antagonist I;Plerixafor	CID:65015	1
ARQ 197 (Tivantinib)	CID:11494412	1
Exemestane	CID:60198	1
GSK-LSD1 hydrochloride	CID:71522234	1
NF449	CID:4470	1
BRD-K34022604;Clofarabine;Clofarabine (BAN, FDA, INN, USAN)	CID:119182	1
Cimetidine (Tagamet)	CID:2756	1
BMS-536924	CID:68925359	1
BRD-K35520305;Dacarbazine	CID:5281007	1
Adenosine Kinase Inhibitor	CID:1973	1
Carmustine	CID:59087767	1
StemRegenin 1	CID:46199207	1
Glyburide (Diabeta)	CID:3488	1
Kenpaullone	CID:3820	1
Eposin;etoposide;Etoposide (BAN, FDA, INN, JAN, USAN, USP);Toposar;Vepesid;VP-16	CID:36462	1
IKK-2 Inhibitor XI	CID:10220851	1
Triptolide	CID:107985	1
SB-505124	CID:9858940	1
NF-kB Activation Inhibitor IV	CID:15113698	1
NSC 74859 (S3I-201)	CID:252682	1
Daidzein	CID:5281708	1
BKM120 (NVP-BKM120)	CID:16654980	1
MNS (3,4-Methylenedioxy-??-nitrostyrene)	CID:672296	1
BRD-K42828737;SU-11248;Sunitinib;Sunitinib (INN);Sunitinib Malate;Sunitinib Malate (FDA);Sutent	CID:5329102	1
Daunorubicin (BAN, INN);Daunorubicin Citrate (FDA);Daunorubicin HCl;Daunorubicin Hydrochloride (JAN, USAN, USP, FDA)	CID:30323	1
PF-4800567	CID:53472153	1
Oncrasin-1	CID:872445	1
AP24534;PONATINIB	CID:24826799	1
ML083	CID:650361	1
2-Methoxyestradiol	CID:66414	1
GDC-0449;HhAntag691;Vismodegib	CID:24776445	1
ELCPK	CID:20959075	1
Betulinic acid	CID:64971	1
Rho Kinase Inhibitor II	CID:16760634	1
Ki8751	CID:11317348	1
GMX-1778	CID:148198	1
BX-795	CID:10077147	1
YM201636	CID:9956222	1
A66	CID:42636535	1
BMS-354825;BMS354825;BRD-K49328571;Dasatinib;Dasatinib (FDA, INN, USAN);Sprycel	CID:3062316	1
PIK-75	CID:9825070	1
10058-F4	CID:1271002	1
PD0325901	CID:9826528	1
Abiraterone;BRD-K50071428;CB-7598	CID:132971	1
TAE684 (NVP-TAE684)	CID:16038120	1
Na+/H+ Exchanger Isoform-1 Inhibitor	CID:11515637	1
Quercetagetin	CID:5281680	1
BMS-907351;BRD-K51544265;Cabozantinib;XL184	CID:25102847	1
TPCA-1	CID:9903786	1
GM6001	CID:132519	1
Hydroxyurea	CID:3657	1
CCNU;Lomustine;Lomustine (BAN, FDA, INN, USAN);Lomustine, CCNU	CID:3950	1
Tpl2 Kinase Inhibitor	CID:9549300	1
IKK-3 Inhibitor IX	CID:11626927	1
Cerulenin,_Cephalosporium_caerulens	CID:5282054	1
Anastrozole	CID:2187	1
AZD7545	CID:16741245	1
Acadesine	CID:17513	1
SB-202474	CID:5162	1
HIF-1 Inhibitor	CID:16124726	1
Dorsomorphin 2HCl	CID:11524144	1
MK-1775	CID:24856436	1
SB 202190	CID:5353940	1
(+)-JQ1	CID:46907787	1
isonicotinohydroxamic acid	CID:72967	1
topotecan;Topotecan (BAN, INN);Topotecan HCl;Topotecan Hydrochloride (USAN, FDA)	CID:60700	1
TSU-68	CID:5329099	1
ABT-737	CID:11228183	1
PLX-4032;R7204;RG7204;RO5185426;Vemurafenib	CID:42611257	1
LAQ824 (NVP-LAQ824, Dacinostat)	CID:6445533	1
AZD6244 (Selumetinib)	CID:10127622	1
Indomethacin (Indocid, Indocin)	CID:3715	1
Aminolevulinic Acid	CID:137	1
AG 1295	CID:2048	1
AT13387	CID:11955716	1
APO866 (FK866)	CID:6914657	1
GSK-3 Inhibitor XIII	CID:6419766	1
Go6976	CID:3501	1
CDDO-Me	CID:400769	1
methotrexate;Methotrexate (BAN, JAN, USAN, USP, INN);Methotrexate Sodium (FDA)	CID:126941	1
mitomycin;Mitomycin (BAN, FDA, INN, USAN, USP);Mitomycin C;Mitomycin C (JAN)	CID:5746	1
UNC0642	CID:53315878	1
Isogranulatimide (Chk Inhibitor V)	CID:6419741	1
Protein Methyltransferase Inhibitor, AMI-5	CID:27020	1
Wnt Antagonist I, IWR-1-endo	CID:44483163	1
SB 225002;SB-225002	CID:3854666	1
Romidepsin (FK228 ,depsipeptide)	CID:5352062	1
(-)-Deguelin	CID:107935	1
Nov-Onxol;Onxol;paclitaxel;Paclitaxel (BAN, FDA, INN, USAN, USP);Taxol	CID:36314	1
PD98059	CID:4713	1
Methoxsalen	CID:4114	1
Raloxifene	CID:5035	1
gefitinib;Gefitinib (BAN, FDA, INN, USAN);Gefitinib(Iressa);Iressa;ZD-1839	CID:123631	1
Ivachtin	CID:11201705	1
GANT58;Hh/Gli Antagonist, GANT58	CID:253078	1
Semagacestat (LY450139)	CID:9843750	1
JNJ 26854165 (Serdemetan)	CID:11609586	1
AFATINIB;BIBW 2992;BIBW2992;BRD-K66175015;Tovok	CID:10184653	1
Altretamine	CID:2123	1
Ixabepilone	CID:45356266	1
PI-103	CID:9884685	1
MK-2206 dihydrochloride	CID:24964624	1
Nifuroxazide	CID:5390108	1
Trichostatin A (TSA)	CID:444732	1
SB 743921	CID:9936388	1
FR 180204	CID:53338808	1
BRD-K69172251;Cisplatin;Cisplatin (BAN, FDA, INN, JAN, USAN, USP)	CID:2767	1
I-CBP112;SGC0946	CID:56962337	1
Tacrolimus (FK506)	CID:445643	1
BI6727 (Volasertib)	CID:10461508	1
Secreted Frizzled Related Protein-1 Inhibitor	CID:25147677	1
BRD-K70301465;PCI-32765	CID:24821094	1
BRD-K70401845;CP-358774;ERLOTINIB;Erlotinib (INN);Erlotinib HCl;Erlotinib Hydrochloride;Erlotinib Hydrochloride (FDA, INN, USAN);NSC 718781;OSI-774;Tarceva	CID:176870	1
IOX1	CID:459617	1
Fludarabine Phosphate (Fludara)	CID:30751	1
N9-isopropylolomoucine	CID:6610355	1
All-trans Retinoic Acid (Tretinoin)	CID:444795	1
Tretinoin;Tretinoin (BAN, FDA, INN, USAN, USP)	CID:444795	1
PF-04217903	CID:17754438	1
ZM 336372	CID:5730	1
Amifostine	CID:2141	1
UNC0321	CID:46901937	1
NSC632839	CID:6477762	1
BRD-K74514084;PAZOPANIB;Pazopanib (INN);Pazopanib HCl;Pazopanib Hydrochloride (FDA, USAN)	CID:10113978	1
Stem-Cell Factor/c-Kit Inhibitor, ISCK03	CID:3792751	1
MLN8237 (Alisertib)	CID:24771867	1
XL765	CID:49867926	1
JNK Inhibitor IX	CID:766949	1
CCT128930	CID:17751819	1
Fasudil HCl (HA-1077)	CID:3547	1
YM155 (Sepantronium Bromide)	CID:10126189	1
Thyroid Hormone Receptor Antagonist, 1-850	CID:2765122	1
PD 169316	CID:4712	1
BRD-K77625799;Vandetanib;Vandetanib (BAN, FDA, INN, USAN);Zactima;ZD6474	CID:3081361	1
AEG 3482	CID:698112	1
1NM-PP1	CID:5154691	1
RO-3306	CID:11631681	1
Oxaliplatin	CID:9887053	1
5-Aza-2_-Deoxycytidine;BRD-K79254416;Decitabine;Decitabine (BAN, FDA, INN, USAN)	CID:451668	1
p38 MAP Kinase Inhibitor V	CID:9884921	1
Sildenafil citrate	CID:5212	1
PF-543	CID:66577038	1
ML204	CID:230710	1
Triciribine (Triciribine phosphate)	CID:65399	1
mw-ctdd-3	CID:44543605	1
SGI-1776 free base	CID:24795070	1
Etomoxir sodium salt	CID:9817751	1
MK-0683;SAHA;vorinostat;Vorinostat (FDA, INN, USAN);Zolinza	CID:5311	1
cx-4945 (Silmitasertib)	CID:24748573	1
17-AAG (Tanespimycin)	CID:6505803	1
BRD-K81528515;Nilotinib;Nilotinib (USAN, INN);Nilotinib Hydrochloride Monohydrate (FDA)	CID:644241	1
PP-121	CID:24905142	1
Vincristine (BAN, INN);Vincristine Sulfate;Vincristine Sulfate (FDA, USP, JAN, USAN)	CID:5388993	1
ABT-263 (Navitoclax)	CID:24978538	1
PF-750	CID:25154868	1
JSH-23	CID:16760588	1
BMS-708163 (Avagacestat)	CID:46883536	1
PDGF RTK Inhibitor	CID:11554659	1
BRD-K84466663;Nelarabine	CID:3011155	1
BRD-K84937637;Rapamycin;Rapamycin (Sirolimus);Sirolimus (BAN, FDA, INN, USAN);Sirolimus (Rapamycin)	CID:60150249	1
Refametinib (RDEA119, Bay 86-9766)	CID:44182295	1
OSI-906 (Linsitinib)	CID:11640390	1
AZD7762	CID:11152667	1
BRD4132	CID:7326481	1
ABT-888 (Veliparib)	CID:11960529	1
Allopurinol	CID:2094	1
Wortmannin	CID:312145	1
PTP1B Inhibitor	CID:448662	1
bortezomib;Bortezomib (BAN, FDA, INN, USAN);MG-341;PS-341;Velcade	CID:387447	1
CI976	CID:122327	1
PI 3-Kgamma Inhibitor VII	CID:1269519	1
4-Hydroxyphenylretinamide	CID:5288209	1
Tandutinib (MLN518)	CID:3038522	1
UCN-02 (PKC inhibitor)	CID:72271	1
GSK269962A	CID:16095342	1
PDGFR Tyrosine Kinase Inhibitor VII	CID:5329150	1
Pentostatin	CID:439693	1
Adriamycin;doxorubicin;Doxorubicin HCl;Doxorubicin Hydrochloride,Rubex	CID:31703	1
Tosedostat (CHR2797)	CID:15547703	1
Bexarotene	CID:82146	1
BRD-K92723993;Gleevec;Glivec;Imatinib;STI571	CID:5291	1
IKK Inhibitor X	CID:9949093	1
SCH 530348	CID:10077130	1
tamoxifen;Tamoxifen (BAN, INN);Tamoxifen Citrate;Tamoxifen Citrate (JAN, USAN, USP, FDA)	CID:2733526	1
Quizartinib (AC220)	CID:24889392	1
STAT3 Inhibitor IX, Cpd188	CID:1652812	1
PARP Inhibitor XI, DR2313	CID:10219702	1
SRT1720	CID:24180125	1
Nifedipine (Adalat)	CID:4485	1
Melatonin	CID:896	1
PD173074	CID:1401	1
SMI-4a	CID:1361334	1
(5Z)-7-Oxozeaenol, Curvularia sp.	CID:10361267	1
Linifanib (ABT-869)	CID:11485656	1
U0126-EtOH	CID:16220066	1
Lithium_Chloride,_MB_Grade	CID:6610281	1

## Sheet: screen 1
Well	Signal	%NormalizationControl	Cell Sample	Replicates	Compound	[Compound]
A01	0	-0.00963484	NOK	1	Blank	0
A02	1788	5.73273	NOK	1	Side Car Control	1e-05
A03	27772	89.1833	NOK	1	Acadesine	4.57247e-09
A04	27696	88.9392	NOK	1	10058-F4	4.57247e-09
A05	26592	85.3936	NOK	1	PD0325901	4.57247e-09
A06	31584	101.426	NOK	1	APO866 (FK866)	4.57247e-09
A07	27792	89.2475	NOK	1	HA14-1	4.57247e-09
A08	28280	90.8148	NOK	1	NSC 23766	4.57247e-09
A09	29024	93.2042	NOK	1	LAQ824 (NVP-LAQ824, Dacinostat)	4.57247e-09
A10	29852	95.8634	NOK	1	PF-543	4.57247e-09
A11	30676	98.5098	NOK	1	MLN8237 (Alisertib)	4.57247e-09
A12	32632	104.792	NOK	1	Betulinic acid	4.57247e-09
A13	30508	97.9703	NOK	1	BIBR1532	4.57247e-09
A14	34600	111.112	NOK	1	SMI-4a	4.57247e-09
A15	29120	93.5125	NOK	1	PD173074	4.57247e-09
A16	30968	99.4476	NOK	1	WP1066	4.57247e-09
A17	29336	94.2062	NOK	1	Tosedostat (CHR2797)	4.57247e-09
A18	30960	99.4219	NOK	1	GM6001	4.57247e-09
A19	29624	95.1312	NOK	1	SP600125	4.57247e-09
A20	33352	107.104	NOK	1	NH125	4.57247e-09
A21	30024	96.4158	NOK	1	Daidzein	4.57247e-09
A22	27744	89.0934	NOK	1	AZD7545	4.57247e-09
A23	31020	99.6146	NOK	1	DMSO Control	0.001
A24	4	0.00321161	NOK	1	Blank	0
B01	4	0.00321161	NOK	1	Blank	0
B02	16804	53.9583	NOK	1	Side Car Control	3.33333e-06
B03	32324	103.803	NOK	1	Chk2 Inhibitor	4.57247e-09
B04	27384	87.9372	NOK	1	Methotrexate	4.57247e-09
B05	30076	96.5828	NOK	1	PIM1/2 Kinase Inhibitor VI	4.57247e-09
B06	33248	106.77	NOK	1	Busulfan	4.57247e-09
B07	29648	95.2083	NOK	1	indisulam	4.57247e-09
B08	31460	101.028	NOK	1	Allopurinol	4.57247e-09
B09	28956	92.9858	NOK	1	SKF-96365, Hydrochloride	4.57247e-09
B10	33048	106.128	NOK	1	Chlorambucil	4.57247e-09
B11	34344	110.29	NOK	1	STAT5 Inhibitor	4.57247e-09
B12	33704	108.235	NOK	1	Melphalan	4.57247e-09
B13	33588	107.862	NOK	1	PDGF RTK Inhibitor	4.57247e-09
B14	29488	94.6944	NOK	1	Altretamine	4.57247e-09
B15	33232	106.719	NOK	1	NSC632839	4.57247e-09
B16	31508	101.182	NOK	1	Aminolevulinic Acid	4.57247e-09
B17	33968	109.082	NOK	1	IKK-3 Inhibitor IX	4.57247e-09
B18	32808	105.357	NOK	1	Fluorouracil	4.57247e-09
B19	30304	97.3151	NOK	1	SB-202474	4.57247e-09
B20	32680	104.946	NOK	1	Pipobroman	4.57247e-09
B21	28920	92.8702	NOK	1	PKR Inhibitor	4.57247e-09
B22	28840	92.6133	NOK	1	Cyclophophamide	4.57247e-09
B23	27904	89.6072	NOK	1	DMSO Control	0.001
B24	4	0.00321161	NOK	1	Blank	0
C01	0	-0.00963484	NOK	1	Blank	0
C02	22800	73.2151	NOK	1	Side Car Control	1.11111e-06
C03	30856	99.0879	NOK	1	ABT-737	4.57247e-09
C04	28056	90.0954	NOK	1	Quercetagetin	4.57247e-09
C05	30524	98.0216	NOK	1	Perifosine (KRX-0401)	4.57247e-09
C06	30288	97.2637	NOK	1	ML-030	4.57247e-09
C07	29452	94.5788	NOK	1	SB 202190	4.57247e-09
C08	32244	103.546	NOK	1	PI 3-Kgamma Inhibitor VII	4.57247e-09
C09	31972	102.672	NOK	1	U0126-EtOH	4.57247e-09
C10	32880	105.588	NOK	1	GSK-J1 (sodium salt)	4.57247e-09
C11	34500	110.791	NOK	1	Iniparib (BSI-201)	4.57247e-09
C12	33272	106.847	NOK	1	Tpl2 Kinase Inhibitor	4.57247e-09
C13	27600	88.6309	NOK	1	Melatonin	4.57247e-09
C14	32500	104.368	NOK	1	PF-750	4.57247e-09
C15	33400	107.258	NOK	1	ABT-888 (Veliparib)	4.57247e-09
C16	30784	98.8567	NOK	1	Rho Kinase Inhibitor II	4.57247e-09
C17	32660	104.882	NOK	1	XL765	4.57247e-09
C18	32356	103.905	NOK	1	Bexarotene	4.57247e-09
C19	30112	96.6985	NOK	1	AZD6244 (Selumetinib)	4.57247e-09
C20	31140	100	NOK	1	Thyroid Hormone Receptor Antagonist, 1-850	4.57247e-09
C21	29516	94.7843	NOK	1	LDE225 (NVP-LDE225, Erismodegib)	4.57247e-09
C22	28104	90.2495	NOK	1	GSK-LSD1 hydrochloride	4.57247e-09
C23	29204	93.7823	NOK	1	DMSO Control	0.001
C24	4	0.00321161	NOK	1	Blank	0
D01	4	0.00321161	NOK	1	Blank	0
D02	24848	79.7925	NOK	1	Side Car Control	3.7037e-07
D03	34128	109.596	NOK	1	ERK Inhibitor II, Negative control	4.57247e-09
D04	27148	87.1792	NOK	1	Mitomycin C	4.57247e-09
D05	32112	103.122	NOK	1	AA-COCF3	4.57247e-09
D06	33172	106.526	NOK	1	Floxuridine	4.57247e-09
D07	29328	94.1806	NOK	1	VEGF Receptor 2 Kinase Inhibitor I	4.57247e-09
D08	35332	113.463	NOK	1	Hydroxyurea	4.57247e-09
D09	31588	101.439	NOK	1	Pentostatin	4.57247e-09
D10	31636	101.593	NOK	1	Uracil mustard	4.57247e-09
D11	34868	111.973	NOK	1	GSK-3 Inhibitor XIII	4.57247e-09
D12	36920	118.563	NOK	1	Mitotane	4.57247e-09
D13	31204	100.206	NOK	1	importazole	4.57247e-09
D14	33388	107.22	NOK	1	Dacarbazine	4.57247e-09
D15	33080	106.231	NOK	1	Secreted Frizzled Related Protein-1 Inhibitor	4.57247e-09
D16	35456	113.861	NOK	1	Methoxsalen	4.57247e-09
D17	34300	110.149	NOK	1	CD-1530	4.57247e-09
D18	23760	76.2983	NOK	1	Vinblastine	4.57247e-09
D19	30992	99.5247	NOK	1	STAT3 Inhibitor IX, Cpd188	4.57247e-09
D20	32104	103.096	NOK	1	Thalidomide	4.57247e-09
D21	34812	111.793	NOK	1	Stem-Cell Factor/c-Kit Inhibitor, ISCK03	4.57247e-09
D22	19184	61.602	NOK	1	Vincristine	4.57247e-09
D23	30180	96.9169	NOK	1	DMSO Control	0.001
D24	4	0.00321161	NOK	1	Blank	0
E01	0	-0.00963484	NOK	1	Blank	0
E02	28356	91.0589	NOK	1	Side Car Control	1.23457e-07
E03	32012	102.801	NOK	1	Linifanib (ABT-869)	4.57247e-09
E04	30920	99.2934	NOK	1	(+)-JQ1	4.57247e-09
E05	36992	118.794	NOK	1	PI-103	4.57247e-09
E06	31104	99.8844	NOK	1	Ciclopirox ethanolamine	4.57247e-09
E07	36720	117.921	NOK	1	MK-2206 dihydrochloride	4.57247e-09
E08	35568	114.221	NOK	1	Rofecoxib (Vioxx)	4.57247e-09
E09	33360	107.13	NOK	1	TAE684 (NVP-TAE684)	4.57247e-09
E10	33072	106.205	NOK	1	Dorsomorphin 2HCl	4.57247e-09
E11	37548	120.58	NOK	1	PLX-4720	4.57247e-09
E12	35592	114.298	NOK	1	Lomeguatrib	4.57247e-09
E13	34876	111.999	NOK	1	PIK-75	4.57247e-09
E14	37092	119.116	NOK	1	JSH-23	4.57247e-09
E15	36416	116.944	NOK	1	GSK1059615	4.57247e-09
E16	31868	102.338	NOK	1	PD168393	4.57247e-09
E17	37272	119.694	NOK	1	MK-1775	4.57247e-09
E18	36676	117.779	NOK	1	ZM 336372	4.57247e-09
E19	36576	117.458	NOK	1	GSK429286A	4.57247e-09
E20	3780	12.1303	NOK	1	Romidepsin (FK228 ,depsipeptide)	4.57247e-09
E21	23812	76.4653	NOK	1	SB 743921	4.57247e-09
E22	31436	100.951	NOK	1	Fedratinib (SAR302503, TG101348)	4.57247e-09
E23	33728	108.312	NOK	1	DMSO Control	0.001
E24	0	-0.00963484	NOK	1	Blank	0
F01	0	-0.00963484	NOK	1	Blank	0
F02	32108	103.109	NOK	1	Side Car Control	4.11523e-08
F03	31620	101.542	NOK	1	FGF/PDGF/VEGF RTK Inhibitor	4.57247e-09
F04	36836	118.293	NOK	1	Procarbazine	4.57247e-09
F05	38304	123.008	NOK	1	MST-312;Telomerase Inhibitor IX	4.57247e-09
F06	38476	123.56	NOK	1	Lomustine	4.57247e-09
F07	31880	102.377	NOK	1	p38 MAP Kinase Inhibitor V	4.57247e-09
F08	36344	116.713	NOK	1	Daunorubicin	4.57247e-09
F09	36288	116.533	NOK	1	PRL-3 Inhibitor I	4.57247e-09
F10	38468	123.535	NOK	1	Azacitidine	4.57247e-09
F11	39248	126.04	NOK	1	UCN-02 (PKC inhibitor)	4.57247e-09
F12	39156	125.744	NOK	1	Cladribine	4.57247e-09
F13	39160	125.757	NOK	1	ABT-263 (Navitoclax)	4.57247e-09
F14	38636	124.074	NOK	1	Ifosfamide	4.57247e-09
F15	37708	121.094	NOK	1	Vinorelbine Tartrate	4.57247e-09
F16	34916	112.127	NOK	1	Tretinoin	4.57247e-09
F17	38668	124.177	NOK	1	Valinomycin,_Streptomyces_fulvissimus	4.57247e-09
F18	34720	111.498	NOK	1	Adriamycin	4.57247e-09
F19	35660	114.516	NOK	1	HNF4a napthofuran agonist "Compound 5"	4.57247e-09
F20	21708	69.7081	NOK	1	Paclitaxel	4.57247e-09
F21	36800	118.178	NOK	1	Go6976	4.57247e-09
F22	34508	110.817	NOK	1	Decitabine	4.57247e-09
F23	33352	107.104	NOK	1	DMSO Control	0.001
F24	4	0.00321161	NOK	1	Blank	0
G01	8	0.0160581	NOK	1	Blank	0
G02	27804	89.2861	NOK	1	Side Car Control	1.37174e-08
G03	36356	116.752	NOK	1	BMS-536924	4.57247e-09
G04	28592	91.8168	NOK	1	GMX-1778	4.57247e-09
G05	36780	118.113	NOK	1	Tandutinib (MLN518)	4.57247e-09
G06	34932	112.178	NOK	1	SCH 530348	4.57247e-09
G07	30944	99.3705	NOK	1	PF-04217903	4.57247e-09
G08	33404	107.271	NOK	1	RO-3306	4.57247e-09
G09	33588	107.862	NOK	1	GSK690693	4.57247e-09
G10	35228	113.129	NOK	1	SD-208	4.57247e-09
G11	39880	128.069	NOK	1	IKK Inhibitor X	4.57247e-09
G12	22404	71.9433	NOK	1	Ixabepilone	4.57247e-09
G13	34976	112.32	NOK	1	YM201636	4.57247e-09
G14	37340	119.912	NOK	1	PF-4800567	4.57247e-09
G15	30188	96.9425	NOK	1	MGCD0103 (Mocetinostat)?	4.57247e-09
G16	31052	99.7174	NOK	1	CDDO-Me	4.57247e-09
G17	32892	105.627	NOK	1	Quizartinib (AC220)	4.57247e-09
G18	36016	115.66	NOK	1	GSK269962A	4.57247e-09
G19	33044	106.115	NOK	1	Marimastat	4.57247e-09
G20	33912	108.903	NOK	1	BXL 628	4.57247e-09
G21	35420	113.746	NOK	1	SGI-1776 free base	4.57247e-09
G22	31060	99.7431	NOK	1	N9-isopropylolomoucine	4.57247e-09
G23	30516	97.996	NOK	1	DMSO Control	0.001
G24	0	-0.00963484	NOK	1	Blank	0
H01	0	-0.00963484	NOK	1	Blank	0
H02	32668	104.907	NOK	1	Side Car Control	4.57247e-09
H03	32440	104.175	NOK	1	isonicotinohydroxamic acid	4.57247e-09
H04	31160	100.064	NOK	1	Etoposide	4.57247e-09
H05	24868	79.8568	NOK	1	ML204	4.57247e-09
H06	35804	114.979	NOK	1	Tamoxifen	4.57247e-09
H07	14776	47.4452	NOK	1	mw-ctdd-3	4.57247e-09
H08	28604	91.8553	NOK	1	Rapamycin	4.57247e-09
H09	33812	108.581	NOK	1	cytochalasin_B	4.57247e-09
H10	37708	121.094	NOK	1	Carboplatin	4.57247e-09
H11	33276	106.86	NOK	1	Glyburide (Diabeta)	4.57247e-09
H12	38228	122.764	NOK	1	Oxaliplatin	4.57247e-09
H13	34296	110.136	NOK	1	TPCA-1	4.57247e-09
H14	33476	107.502	NOK	1	Mitoxantrone	4.57247e-09
H15	35868	115.185	NOK	1	(5Z)-7-Oxozeaenol, Curvularia sp.	4.57247e-09
H16	37344	119.925	NOK	1	Cytarabine	4.57247e-09
H17	38968	125.141	NOK	1	Nigericin	4.57247e-09
H18	33068	106.192	NOK	1	Amifostine	4.57247e-09
H19	37428	120.195	NOK	1	Wnt Antagonist I, IWR-1-endo	4.57247e-09
H20	34328	110.239	NOK	1	Temozolomide	4.57247e-09
H21	35092	112.692	NOK	1	Clioquinol	4.57247e-09
H22	30504	97.9574	NOK	1	Imiquimod	4.57247e-09
H23	29600	95.0541	NOK	1	DMSO Control	0.001
H24	4	0.00321161	NOK	1	Blank	0
I01	4	0.00321161	NOK	1	Blank	0
I02	30784	98.8567	NOK	1	Side Car Control	1.52416e-09
I03	35592	114.298	NOK	1	Saracatinib (AZD0530)	4.57247e-09
I04	31748	101.953	NOK	1	ML083	4.57247e-09
I05	37676	120.991	NOK	1	Trichostatin A (TSA)	4.57247e-09
I06	34988	112.358	NOK	1	Lithium_Chloride,_MB_Grade	4.57247e-09
I07	34192	109.802	NOK	1	Refametinib (RDEA119, Bay 86-9766)	4.57247e-09
I08	35908	115.313	NOK	1	AG-690/36107028	4.57247e-09
I09	35660	114.516	NOK	1	Triciribine (Triciribine phosphate)	4.57247e-09
I10	34008	109.211	NOK	1	A66	4.57247e-09
I11	39288	126.168	NOK	1	AT13387	4.57247e-09
I12	36964	118.704	NOK	1	BRD9647	4.57247e-09
I13	36060	115.801	NOK	1	Cimetidine (Tagamet)	4.57247e-09
I14	34676	111.356	NOK	1	StemRegenin 1	4.57247e-09
I15	35704	114.658	NOK	1	Sildenafil citrate	4.57247e-09
I16	35736	114.761	NOK	1	ARQ 197 (Tivantinib)	4.57247e-09
I17	38460	123.509	NOK	1	AZD7762	4.57247e-09
I18	35260	113.232	NOK	1	IOX1	4.57247e-09
I19	35428	113.771	NOK	1	BX-795	4.57247e-09
I20	32836	105.447	NOK	1	SB 225002;SB-225002	4.57247e-09
I21	31696	101.786	NOK	1	BI6727 (Volasertib)	4.57247e-09
I22	29804	95.7093	NOK	1	BIX01294	4.57247e-09
I23	34696	111.42	NOK	1	DMSO Control	0.001
I24	0	-0.00963484	NOK	1	Blank	0
J01	4	0.00321161	NOK	1	Blank	0
J02	33588	107.862	NOK	1	Side Car Control	5.08053e-10
J03	34572	111.022	NOK	1	ELCPK	4.57247e-09
J04	30776	98.831	NOK	1	Carmustine	4.57247e-09
J05	37208	119.488	NOK	1	PDGFR Tyrosine Kinase Inhibitor VII	4.57247e-09
J06	35316	113.412	NOK	1	Clofarabine	4.57247e-09
J07	35972	115.519	NOK	1	Indomethacin (Indocid, Indocin)	4.57247e-09
J08	29136	93.5639	NOK	1	Topotecan	4.57247e-09
J09	34004	109.198	NOK	1	NF449	4.57247e-09
J10	26380	84.7127	NOK	1	Gemcitabine	4.57247e-09
J11	32288	103.687	NOK	1	UNC0642	4.57247e-09
J12	37152	119.308	NOK	1	Irinotecan	4.57247e-09
J13	33028	106.064	NOK	1	Myoseverin	4.57247e-09
J14	25044	80.422	NOK	1	Docetaxel	4.57247e-09
J15	32432	104.149	NOK	1	NSC401077	4.57247e-09
J16	37304	119.796	NOK	1	Vorinostat	4.57247e-09
J17	29916	96.069	NOK	1	NF-kB Activation Inhibitor IV	4.57247e-09
J18	36316	116.623	NOK	1	Exemestane	4.57247e-09
J19	37660	120.94	NOK	1	TGX-221	4.57247e-09
J20	33344	107.078	NOK	1	Gefitinib	4.57247e-09
J21	36120	115.994	NOK	1	Semagacestat (LY450139)	4.57247e-09
J22	29964	96.2231	NOK	1	Erlotinib	4.57247e-09
J23	31792	102.094	NOK	1	DMSO Control	0.001
J24	4	0.00321161	NOK	1	Blank	0
K01	4	0.00321161	NOK	1	Blank	0
K02	32992	105.948	NOK	1	Side Car Control	1.69351e-10
K03	33292	106.911	NOK	1	SB 203580	4.57247e-09
K04	32748	105.164	NOK	1	GSK-3 inhibitor IX	4.57247e-09
K05	36456	117.073	NOK	1	Olaparib (AZD2281)	4.57247e-09
K06	30496	97.9317	NOK	1	(-)-Deguelin	4.57247e-09
K07	36508	117.24	NOK	1	Alsterpaullone	4.57247e-09
K08	32608	104.715	NOK	1	PARP Inhibitor XI, DR2313	4.57247e-09
K09	37252	119.629	NOK	1	TW-37	4.57247e-09
K10	35320	113.425	NOK	1	CI976	4.57247e-09
K11	36344	116.713	NOK	1	PI 3-Kalpha Inhibitor IV	4.57247e-09
K12	37732	121.171	NOK	1	AY 9944	4.57247e-09
K13	35408	113.707	NOK	1	Fludarabine Phosphate (Fludara)	4.57247e-09
K14	37100	119.141	NOK	1	1NM-PP1	4.57247e-09
K15	37896	121.698	NOK	1	Parbendazole	4.57247e-09
K16	34560	110.984	NOK	1	p38 MAP Kinase Inhibitor VI, JX401	4.57247e-09
K17	36428	116.983	NOK	1	EX 527	4.57247e-09
K18	38956	125.102	NOK	1	SB 218078;SB-218078	4.57247e-09
K19	35884	115.236	NOK	1	Isogranulatimide (Chk Inhibitor V)	4.57247e-09
K20	31756	101.978	NOK	1	(?)-Bay K 8644	4.57247e-09
K21	35152	112.885	NOK	1	BKM120 (NVP-BKM120)	4.57247e-09
K22	28760	92.3564	NOK	1	Midostaurin hydrate	4.57247e-09
K23	33668	108.119	NOK	1	DMSO Control	0.001
K24	4	0.00321161	NOK	1	Blank	0
L01	4	0.00321161	NOK	1	Blank	0
L02	31424	100.912	NOK	1	Side Car Control	5.64503e-11
L03	32532	104.471	NOK	1	Etomoxir sodium salt	4.57247e-09
L04	31788	102.081	NOK	1	Fulvestrant	4.57247e-09
L05	34128	109.596	NOK	1	Necrostatin-7	4.57247e-09
L06	34624	111.189	NOK	1	Anastrozole	4.57247e-09
L07	30552	98.1116	NOK	1	GANT58;Hh/Gli Antagonist, GANT58	4.57247e-09
L08	37684	121.017	NOK	1	Celecoxib	4.57247e-09
L09	33600	107.901	NOK	1	Adenosine Kinase Inhibitor	4.57247e-09
L10	29100	93.4483	NOK	1	Dasatinib	4.57247e-09
L11	36456	117.073	NOK	1	17-AAG (Tanespimycin)	4.57247e-09
L12	38672	124.19	NOK	1	Pazopanib	4.57247e-09
L13	33100	106.295	NOK	1	HIF-1 Inhibitor	4.57247e-09
L14	37548	120.58	NOK	1	Imatinib	4.57247e-09
L15	35108	112.744	NOK	1	Protein Methyltransferase Inhibitor, AMI-5	4.57247e-09
L16	36268	116.469	NOK	1	Lapatinib	4.57247e-09
L17	36864	118.383	NOK	1	All-trans Retinoic Acid (Tretinoin)	4.57247e-09
L18	33060	106.166	NOK	1	Nilotinib	4.57247e-09
L19	35248	113.193	NOK	1	PP-121	4.57247e-09
L20	35320	113.425	NOK	1	Sorafenib	4.57247e-09
L21	34232	109.93	NOK	1	FGF Receptor Tyrosine Kinase Inhibitor	4.57247e-09
L22	31756	101.978	NOK	1	Lenalidomide	4.57247e-09
L23	33452	107.425	NOK	1	DMSO Control	0.001
L24	4	0.00321161	NOK	1	Blank	0
M01	4	0.00321161	NOK	1	Blank	0
M02	30484	97.8932	NOK	1	Side Car Control	1.88168e-11
M03	30256	97.1609	NOK	1	BEZ235 (NVP-BEZ235)	4.57247e-09
M04	28324	90.9561	NOK	1	BRD4132	4.57247e-09
M05	31084	99.8201	NOK	1	Nutlin-3	4.57247e-09
M06	33780	108.479	NOK	1	CCT128930	4.57247e-09
M07	28356	91.0589	NOK	1	OSI-906 (Linsitinib)	4.57247e-09
M08	31668	101.696	NOK	1	Ivachtin	4.57247e-09
M09	31912	102.479	NOK	1	SRT1720	4.57247e-09
M10	32636	104.805	NOK	1	MNS (3,4-Methylenedioxy-??-nitrostyrene)	4.57247e-09
M11	31912	102.479	NOK	1	JNJ 26854165 (Serdemetan)	4.57247e-09
M12	36944	118.64	NOK	1	Wortmannin	4.57247e-09
M13	30788	98.8695	NOK	1	2-Methoxyestradiol	4.57247e-09
M14	35000	112.397	NOK	1	Tacrolimus (FK506)	4.57247e-09
M15	30236	97.0967	NOK	1	TSU-68	4.57247e-09
M16	30872	99.1393	NOK	1	NVP-231	4.57247e-09
M17	33396	107.245	NOK	1	Fasudil HCl (HA-1077)	4.57247e-09
M18	31132	99.9743	NOK	1	FR 180204	4.57247e-09
M19	34352	110.316	NOK	1	Ki8751	4.57247e-09
M20	30292	97.2766	NOK	1	GSK-3b Inhibitor XI	4.57247e-09
M21	32028	102.852	NOK	1	cx-4945 (Silmitasertib)	4.57247e-09
M22	21788	69.965	NOK	1	Triptolide	4.57247e-09
M23	29584	95.0027	NOK	1	DMSO Control	0.001
M24	4	0.00321161	NOK	1	Blank	0
N01	4	0.00321161	NOK	1	Blank	0
N02	29496	94.7201	NOK	1	Side Car Control	6.27225e-12
N03	30140	96.7884	NOK	1	SID 26681509	4.57247e-09
N04	28768	92.3821	NOK	1	Raloxifene	4.57247e-09
N05	31748	101.953	NOK	1	Kenpaullone	4.57247e-09
N06	32008	102.788	NOK	1	Abiraterone	4.57247e-09
N07	31320	100.578	NOK	1	PCI-24781	4.57247e-09
N08	33760	108.414	NOK	1	Sunitinib	4.57247e-09
N09	30804	98.9209	NOK	1	SMER28	4.57247e-09
N10	27872	89.5044	NOK	1	Afatinib	4.57247e-09
N11	34452	110.637	NOK	1	PD98059	4.57247e-09
N12	35796	114.953	NOK	1	Nelarabine	4.57247e-09
N13	31924	102.518	NOK	1	BRD-K26531177	4.57247e-09
N14	32176	103.327	NOK	1	Vismodegib	4.57247e-09
N15	32392	104.021	NOK	1	PD 169316	4.57247e-09
N16	30696	98.574	NOK	1	Ibrutinib	4.57247e-09
N17	34244	109.969	NOK	1	BRD-K20757673	4.57247e-09
N18	1040	3.33044	NOK	1	Bortezomib	4.57247e-09
N19	35920	115.352	NOK	1	Tie2 kinase inhibitor	4.57247e-09
N20	32068	102.98	NOK	1	Axitinib	4.57247e-09
N21	30920	99.2934	NOK	1	BRD-K40109029	4.57247e-09
N22	21704	69.6952	NOK	1	Trametinib	4.57247e-09
N23	30036	96.4544	NOK	1	DMSO Control	0.001
N24	4	0.00321161	NOK	1	Blank	0
O01	4	0.00321161	NOK	1	Blank	0
O02	27448	88.1427	NOK	1	Side Car Control	2.09075e-12
O03	31108	99.8972	NOK	1	AG 1295	4.57247e-09
O04	27684	88.9007	NOK	1	IKK-2 Inhibitor XI	4.57247e-09
O05	32804	105.344	NOK	1	SL327	4.57247e-09
O06	29968	96.236	NOK	1	UNC0321	4.57247e-09
O07	30044	96.4801	NOK	1	Oncrasin-1	4.57247e-09
O08	33504	107.592	NOK	1	Na+/H+ Exchanger Isoform-1 Inhibitor	4.57247e-09
O09	27720	89.0163	NOK	1	YM155 (Sepantronium Bromide)	4.57247e-09
O10	31532	101.259	NOK	1	AEG 3482	4.57247e-09
O11	32980	105.909	NOK	1	Cerulenin,_Cephalosporium_caerulens	4.57247e-09
O12	34232	109.93	NOK	1	CCR2 Antagonist	4.57247e-09
O13	30544	98.0859	NOK	1	BMS-708163 (Avagacestat)	4.57247e-09
O14	33496	107.567	NOK	1	SR8278	4.57247e-09
O15	31216	100.244	NOK	1	Fasentin	4.57247e-09
O16	29628	95.144	NOK	1	4-Hydroxyphenylretinamide	4.57247e-09
O17	34400	110.47	NOK	1	H 89 2HCl	4.57247e-09
O18	33052	106.141	NOK	1	BI-87G3	4.57247e-09
O19	30556	98.1244	NOK	1	JNK Inhibitor IX	4.57247e-09
O20	28940	92.9345	NOK	1	Akt Inhibitor IV	4.57247e-09
O21	30384	97.572	NOK	1	Forskolin	4.57247e-09
O22	28440	91.3286	NOK	1	Cdk/Crk Inhibitor	4.57247e-09
O23	29012	93.1657	NOK	1	DMSO Control	0.001
O24	4	0.00321161	NOK	1	Blank	0
P01	4	0.00321161	NOK	1	Blank	0
P02	26416	84.8283	NOK	1	Side Car Control	6.96917e-13
P03	31452	101.002	NOK	1	OSI-930	4.57247e-09
P04	12528	40.2255	NOK	1	Carfilzomib	4.57247e-09
P05	32156	103.263	NOK	1	BRD-K88477136	4.57247e-09
P06	30420	97.6876	NOK	1	Ponatinib	4.57247e-09
P07	28912	92.8445	NOK	1	nifuroxazide	4.57247e-09
P08	33972	109.095	NOK	1	Vandetanib	4.57247e-09
P09	30360	97.4949	NOK	1	HA-1004	4.57247e-09
P10	30196	96.9682	NOK	1	Cabozantinib	4.57247e-09
P11	31524	101.233	NOK	1	BRD-A45107007	4.57247e-09
P12	32540	104.496	NOK	1	Plerixafor	4.57247e-09
P13	29352	94.2576	NOK	1	BRD-K21894166	4.57247e-09
P14	32440	104.175	NOK	1	Vemurafenib	4.57247e-09
P15	29848	95.8506	NOK	1	nifedipine	4.57247e-09
P16	30272	97.2123	NOK	1	PCI-32765	4.57247e-09
P17	33288	106.899	NOK	1	BRD-K69577666	4.57247e-09
P18	29208	93.7952	NOK	1	Regorafenib	4.57247e-09
P19	30584	98.2143	NOK	1	NSC 74859	4.57247e-09
P20	31960	102.634	NOK	1	Dabrafenib	4.57247e-09
P21	31652	101.644	NOK	1	roscovitine	4.57247e-09
P22	27716	89.0034	NOK	1	Pomalidomide	4.57247e-09
P23	30496	97.9317	NOK	1	DMSO Control	0.001
P24	0	-0.00963484	NOK	1	Blank	0
A01	4	0.00634113	NOK	2	Blank	0
A02	1736	5.86385	NOK	2	Side Car Control	1e-05
A03	25960	87.7878	NOK	2	Acadesine	4.57247e-09
A04	25964	87.8014	NOK	2	10058-F4	4.57247e-09
A05	24496	82.8367	NOK	2	PD0325901	4.57247e-09
A06	28264	95.5798	NOK	2	APO866 (FK866)	4.57247e-09
A07	27572	93.2395	NOK	2	HA14-1	4.57247e-09
A08	26888	90.9263	NOK	2	NSC 23766	4.57247e-09
A09	24236	81.9574	NOK	2	LAQ824 (NVP-LAQ824, Dacinostat)	4.57247e-09
A10	31088	105.13	NOK	2	PF-543	4.57247e-09
A11	31440	106.321	NOK	2	MLN8237 (Alisertib)	4.57247e-09
A12	31500	106.524	NOK	2	Betulinic acid	4.57247e-09
A13	28084	94.9711	NOK	2	BIBR1532	4.57247e-09
A14	30700	103.818	NOK	2	SMI-4a	4.57247e-09
A15	27796	93.9971	NOK	2	PD173074	4.57247e-09
A16	31520	106.591	NOK	2	WP1066	4.57247e-09
A17	29724	100.517	NOK	2	Tosedostat (CHR2797)	4.57247e-09
A18	32168	108.783	NOK	2	GM6001	4.57247e-09
A19	28552	96.5538	NOK	2	SP600125	4.57247e-09
A20	31596	106.848	NOK	2	NH125	4.57247e-09
A21	29672	100.342	NOK	2	Daidzein	4.57247e-09
A22	25992	87.8961	NOK	2	AZD7545	4.57247e-09
A23	27132	91.7515	NOK	2	DMSO Control	0.001
A24	4	0.00634113	NOK	2	Blank	0
B01	0	-0.00718661	NOK	2	Blank	0
B02	16852	56.9852	NOK	2	Side Car Control	3.33333e-06
B03	28592	96.6891	NOK	2	Chk2 Inhibitor	4.57247e-09
B04	26552	89.7899	NOK	2	Methotrexate	4.57247e-09
B05	26476	89.5329	NOK	2	PIM1/2 Kinase Inhibitor VI	4.57247e-09
B06	30528	103.237	NOK	2	Busulfan	4.57247e-09
B07	26212	88.6401	NOK	2	indisulam	4.57247e-09
B08	32224	108.972	NOK	2	Allopurinol	4.57247e-09
B09	29416	99.4758	NOK	2	SKF-96365, Hydrochloride	4.57247e-09
B10	32092	108.526	NOK	2	Chlorambucil	4.57247e-09
B11	32012	108.255	NOK	2	STAT5 Inhibitor	4.57247e-09
B12	28972	97.9742	NOK	2	Melphalan	4.57247e-09
B13	32104	108.566	NOK	2	PDGF RTK Inhibitor	4.57247e-09
B14	27932	94.457	NOK	2	Altretamine	4.57247e-09
B15	30816	104.211	NOK	2	NSC632839	4.57247e-09
B16	27880	94.2811	NOK	2	Aminolevulinic Acid	4.57247e-09
B17	29740	100.572	NOK	2	IKK-3 Inhibitor IX	4.57247e-09
B18	31980	108.147	NOK	2	Fluorouracil	4.57247e-09
B19	30948	104.657	NOK	2	SB-202474	4.57247e-09
B20	31820	107.606	NOK	2	Pipobroman	4.57247e-09
B21	32648	110.406	NOK	2	PKR Inhibitor	4.57247e-09
B22	28960	97.9336	NOK	2	Cyclophophamide	4.57247e-09
B23	28012	94.7276	NOK	2	DMSO Control	0.001
B24	0	-0.00718661	NOK	2	Blank	0
C01	4	0.00634113	NOK	2	Blank	0
C02	21012	71.054	NOK	2	Side Car Control	1.11111e-06
C03	29632	100.206	NOK	2	ABT-737	4.57247e-09
C04	26288	88.8971	NOK	2	Quercetagetin	4.57247e-09
C05	28900	97.7307	NOK	2	Perifosine (KRX-0401)	4.57247e-09
C06	28800	97.3925	NOK	2	ML-030	4.57247e-09
C07	28952	97.9066	NOK	2	SB 202190	4.57247e-09
C08	28948	97.8931	NOK	2	PI 3-Kgamma Inhibitor VII	4.57247e-09
C09	31348	106.01	NOK	2	U0126-EtOH	4.57247e-09
C10	29028	98.1636	NOK	2	GSK-J1 (sodium salt)	4.57247e-09
C11	32024	108.296	NOK	2	Iniparib (BSI-201)	4.57247e-09
C12	29832	100.883	NOK	2	Tpl2 Kinase Inhibitor	4.57247e-09
C13	30532	103.25	NOK	2	Melatonin	4.57247e-09
C14	31704	107.214	NOK	2	PF-750	4.57247e-09
C15	31564	106.74	NOK	2	ABT-888 (Veliparib)	4.57247e-09
C16	30132	101.897	NOK	2	Rho Kinase Inhibitor II	4.57247e-09
C17	30472	103.047	NOK	2	XL765	4.57247e-09
C18	30116	101.843	NOK	2	Bexarotene	4.57247e-09
C19	27712	93.713	NOK	2	AZD6244 (Selumetinib)	4.57247e-09
C20	29620	100.166	NOK	2	Thyroid Hormone Receptor Antagonist, 1-850	4.57247e-09
C21	31108	105.198	NOK	2	LDE225 (NVP-LDE225, Erismodegib)	4.57247e-09
C22	24088	81.4569	NOK	2	GSK-LSD1 hydrochloride	4.57247e-09
C23	28060	94.8899	NOK	2	DMSO Control	0.001
C24	0	-0.00718661	NOK	2	Blank	0
D01	0	-0.00718661	NOK	2	Blank	0
D02	24588	83.1478	NOK	2	Side Car Control	3.7037e-07
D03	33656	113.815	NOK	2	ERK Inhibitor II, Negative control	4.57247e-09
D04	26504	89.6276	NOK	2	Mitomycin C	4.57247e-09
D05	29404	99.4352	NOK	2	AA-COCF3	4.57247e-09
D06	31336	105.969	NOK	2	Floxuridine	4.57247e-09
D07	29312	99.1241	NOK	2	VEGF Receptor 2 Kinase Inhibitor I	4.57247e-09
D08	29864	100.991	NOK	2	Hydroxyurea	4.57247e-09
D09	33048	111.759	NOK	2	Pentostatin	4.57247e-09
D10	32656	110.433	NOK	2	Uracil mustard	4.57247e-09
D11	32856	111.11	NOK	2	GSK-3 Inhibitor XIII	4.57247e-09
D12	36264	122.635	NOK	2	Mitotane	4.57247e-09
D13	30132	101.897	NOK	2	importazole	4.57247e-09
D14	31576	106.781	NOK	2	Dacarbazine	4.57247e-09
D15	34900	118.022	NOK	2	Secreted Frizzled Related Protein-1 Inhibitor	4.57247e-09
D16	31764	107.417	NOK	2	Methoxsalen	4.57247e-09
D17	33104	111.948	NOK	2	CD-1530	4.57247e-09
D18	21252	71.8657	NOK	2	Vinblastine	4.57247e-09
D19	30020	101.518	NOK	2	STAT3 Inhibitor IX, Cpd188	4.57247e-09
D20	34108	115.344	NOK	2	Thalidomide	4.57247e-09
D21	30244	102.276	NOK	2	Stem-Cell Factor/c-Kit Inhibitor, ISCK03	4.57247e-09
D22	18036	60.9894	NOK	2	Vincristine	4.57247e-09
D23	26564	89.8305	NOK	2	DMSO Control	0.001
D24	0	-0.00718661	NOK	2	Blank	0
E01	0	-0.00718661	NOK	2	Blank	0
E02	29028	98.1636	NOK	2	Side Car Control	1.23457e-07
E03	30344	102.614	NOK	2	Linifanib (ABT-869)	4.57247e-09
E04	24536	82.972	NOK	2	(+)-JQ1	4.57247e-09
E05	33548	113.45	NOK	2	PI-103	4.57247e-09
E06	35584	120.336	NOK	2	Ciclopirox ethanolamine	4.57247e-09
E07	32368	109.459	NOK	2	MK-2206 dihydrochloride	4.57247e-09
E08	33120	112.002	NOK	2	Rofecoxib (Vioxx)	4.57247e-09
E09	35864	121.283	NOK	2	TAE684 (NVP-TAE684)	4.57247e-09
E10	36120	122.148	NOK	2	Dorsomorphin 2HCl	4.57247e-09
E11	36676	124.029	NOK	2	PLX-4720	4.57247e-09
E12	34584	116.954	NOK	2	Lomeguatrib	4.57247e-09
E13	32836	111.042	NOK	2	PIK-75	4.57247e-09
E14	35984	121.688	NOK	2	JSH-23	4.57247e-09
E15	32732	110.69	NOK	2	GSK1059615	4.57247e-09
E16	33108	111.962	NOK	2	PD168393	4.57247e-09
E17	32216	108.945	NOK	2	MK-1775	4.57247e-09
E18	36032	121.851	NOK	2	ZM 336372	4.57247e-09
E19	33392	112.922	NOK	2	GSK429286A	4.57247e-09
E20	3808	12.8712	NOK	2	Romidepsin (FK228 ,depsipeptide)	4.57247e-09
E21	22564	76.3028	NOK	2	SB 743921	4.57247e-09
E22	29372	99.327	NOK	2	Fedratinib (SAR302503, TG101348)	4.57247e-09
E23	31544	106.673	NOK	2	DMSO Control	0.001
E24	4	0.00634113	NOK	2	Blank	0
F01	4	0.00634113	NOK	2	Blank	0
F02	30344	102.614	NOK	2	Side Car Control	4.11523e-08
F03	31020	104.9	NOK	2	FGF/PDGF/VEGF RTK Inhibitor	4.57247e-09
F04	34436	116.453	NOK	2	Procarbazine	4.57247e-09
F05	34232	115.763	NOK	2	MST-312;Telomerase Inhibitor IX	4.57247e-09
F06	32800	110.92	NOK	2	Lomustine	4.57247e-09
F07	28652	96.892	NOK	2	p38 MAP Kinase Inhibitor V	4.57247e-09
F08	35152	118.875	NOK	2	Daunorubicin	4.57247e-09
F09	32992	111.57	NOK	2	PRL-3 Inhibitor I	4.57247e-09
F10	32292	109.202	NOK	2	Azacitidine	4.57247e-09
F11	36508	123.46	NOK	2	UCN-02 (PKC inhibitor)	4.57247e-09
F12	34160	115.52	NOK	2	Cladribine	4.57247e-09
F13	36628	123.866	NOK	2	ABT-263 (Navitoclax)	4.57247e-09
F14	32220	108.959	NOK	2	Ifosfamide	4.57247e-09
F15	35812	121.107	NOK	2	Vinorelbine Tartrate	4.57247e-09
F16	27880	94.2811	NOK	2	Tretinoin	4.57247e-09
F17	37788	127.789	NOK	2	Valinomycin,_Streptomyces_fulvissimus	4.57247e-09
F18	33948	114.803	NOK	2	Adriamycin	4.57247e-09
F19	33164	112.151	NOK	2	HNF4a napthofuran agonist "Compound 5"	4.57247e-09
F20	22160	74.9365	NOK	2	Paclitaxel	4.57247e-09
F21	32828	111.015	NOK	2	Go6976	4.57247e-09
F22	33708	113.991	NOK	2	Decitabine	4.57247e-09
F23	29536	99.8816	NOK	2	DMSO Control	0.001
F24	4	0.00634113	NOK	2	Blank	0
G01	4	0.00634113	NOK	2	Blank	0
G02	28336	95.8233	NOK	2	Side Car Control	1.37174e-08
G03	31668	107.092	NOK	2	BMS-536924	4.57247e-09
G04	26524	89.6952	NOK	2	GMX-1778	4.57247e-09
G05	33124	112.016	NOK	2	Tandutinib (MLN518)	4.57247e-09
G06	29592	100.071	NOK	2	SCH 530348	4.57247e-09
G07	29880	101.045	NOK	2	PF-04217903	4.57247e-09
G08	30756	104.008	NOK	2	RO-3306	4.57247e-09
G09	33088	111.894	NOK	2	GSK690693	4.57247e-09
G10	36628	123.866	NOK	2	SD-208	4.57247e-09
G11	34820	117.752	NOK	2	IKK Inhibitor X	4.57247e-09
G12	21820	73.7866	NOK	2	Ixabepilone	4.57247e-09
G13	34372	116.237	NOK	2	YM201636	4.57247e-09
G14	33508	113.315	NOK	2	PF-4800567	4.57247e-09
G15	35180	118.969	NOK	2	MGCD0103 (Mocetinostat)?	4.57247e-09
G16	29384	99.3676	NOK	2	CDDO-Me	4.57247e-09
G17	32220	108.959	NOK	2	Quizartinib (AC220)	4.57247e-09
G18	34416	116.385	NOK	2	GSK269962A	4.57247e-09
G19	31472	106.429	NOK	2	Marimastat	4.57247e-09
G20	33044	111.745	NOK	2	BXL 628	4.57247e-09
G21	31644	107.011	NOK	2	SGI-1776 free base	4.57247e-09
G22	27428	92.7525	NOK	2	N9-isopropylolomoucine	4.57247e-09
G23	31340	105.983	NOK	2	DMSO Control	0.001
G24	0	-0.00718661	NOK	2	Blank	0
H01	4	0.00634113	NOK	2	Blank	0
H02	29912	101.153	NOK	2	Side Car Control	4.57247e-09
H03	31584	106.808	NOK	2	isonicotinohydroxamic acid	4.57247e-09
H04	30860	104.359	NOK	2	Etoposide	4.57247e-09
H05	22636	76.5463	NOK	2	ML204	4.57247e-09
H06	32968	111.488	NOK	2	Tamoxifen	4.57247e-09
H07	22084	74.6795	NOK	2	mw-ctdd-3	4.57247e-09
H08	26776	90.5475	NOK	2	Rapamycin	4.57247e-09
H09	30928	104.589	NOK	2	cytochalasin_B	4.57247e-09
H10	36192	122.392	NOK	2	Carboplatin	4.57247e-09
H11	36632	123.88	NOK	2	Glyburide (Diabeta)	4.57247e-09
H12	32032	108.323	NOK	2	Oxaliplatin	4.57247e-09
H13	35216	119.091	NOK	2	TPCA-1	4.57247e-09
H14	30780	104.089	NOK	2	Mitoxantrone	4.57247e-09
H15	35000	118.361	NOK	2	(5Z)-7-Oxozeaenol, Curvularia sp.	4.57247e-09
H16	29924	101.194	NOK	2	Cytarabine	4.57247e-09
H17	33820	114.37	NOK	2	Nigericin	4.57247e-09
H18	30448	102.966	NOK	2	Amifostine	4.57247e-09
H19	35264	119.253	NOK	2	Wnt Antagonist I, IWR-1-endo	4.57247e-09
H20	30624	103.561	NOK	2	Temozolomide	4.57247e-09
H21	31848	107.701	NOK	2	Clioquinol	4.57247e-09
H22	26680	90.2228	NOK	2	Imiquimod	4.57247e-09
H23	29952	101.289	NOK	2	DMSO Control	0.001
H24	4	0.00634113	NOK	2	Blank	0
I01	8	0.0198689	NOK	2	Blank	0
I02	28276	95.6204	NOK	2	Side Car Control	1.52416e-09
I03	32240	109.026	NOK	2	Saracatinib (AZD0530)	4.57247e-09
I04	29884	101.059	NOK	2	ML083	4.57247e-09
I05	34584	116.954	NOK	2	Trichostatin A (TSA)	4.57247e-09
I06	33288	112.571	NOK	2	Lithium_Chloride,_MB_Grade	4.57247e-09
I07	28736	97.1761	NOK	2	Refametinib (RDEA119, Bay 86-9766)	4.57247e-09
I08	36008	121.77	NOK	2	AG-690/36107028	4.57247e-09
I09	34376	116.25	NOK	2	Triciribine (Triciribine phosphate)	4.57247e-09
I10	31424	106.267	NOK	2	A66	4.57247e-09
I11	34580	116.94	NOK	2	AT13387	4.57247e-09
I12	34036	115.1	NOK	2	BRD9647	4.57247e-09
I13	30752	103.994	NOK	2	Cimetidine (Tagamet)	4.57247e-09
I14	37116	125.517	NOK	2	StemRegenin 1	4.57247e-09
I15	34500	116.67	NOK	2	Sildenafil citrate	4.57247e-09
I16	32736	110.704	NOK	2	ARQ 197 (Tivantinib)	4.57247e-09
I17	37420	126.545	NOK	2	AZD7762	4.57247e-09
I18	35208	119.064	NOK	2	IOX1	4.57247e-09
I19	37688	127.451	NOK	2	BX-795	4.57247e-09
I20	31732	107.308	NOK	2	SB 225002;SB-225002	4.57247e-09
I21	34708	117.373	NOK	2	BI6727 (Volasertib)	4.57247e-09
I22	26240	88.7348	NOK	2	BIX01294	4.57247e-09
I23	30052	101.627	NOK	2	DMSO Control	0.001
I24	4	0.00634113	NOK	2	Blank	0
J01	0	-0.00718661	NOK	2	Blank	0
J02	30512	103.182	NOK	2	Side Car Control	5.08053e-10
J03	35988	121.702	NOK	2	ELCPK	4.57247e-09
J04	27844	94.1594	NOK	2	Carmustine	4.57247e-09
J05	32160	108.756	NOK	2	PDGFR Tyrosine Kinase Inhibitor VII	4.57247e-09
J06	33664	113.842	NOK	2	Clofarabine	4.57247e-09
J07	32728	110.677	NOK	2	Indomethacin (Indocid, Indocin)	4.57247e-09
J08	27800	94.0106	NOK	2	Topotecan	4.57247e-09
J09	34164	115.533	NOK	2	NF449	4.57247e-09
J10	23776	80.4017	NOK	2	Gemcitabine	4.57247e-09
J11	33836	114.424	NOK	2	UNC0642	4.57247e-09
J12	35452	119.889	NOK	2	Irinotecan	4.57247e-09
J13	31976	108.134	NOK	2	Myoseverin	4.57247e-09
J14	22164	74.95	NOK	2	Docetaxel	4.57247e-09
J15	31532	106.632	NOK	2	NSC401077	4.57247e-09
J16	32336	109.351	NOK	2	Vorinostat	4.57247e-09
J17	26972	91.2104	NOK	2	NF-kB Activation Inhibitor IV	4.57247e-09
J18	29844	100.923	NOK	2	Exemestane	4.57247e-09
J19	33340	112.747	NOK	2	TGX-221	4.57247e-09
J20	34992	118.333	NOK	2	Gefitinib	4.57247e-09
J21	34596	116.994	NOK	2	Semagacestat (LY450139)	4.57247e-09
J22	27980	94.6193	NOK	2	Erlotinib	4.57247e-09
J23	28044	94.8358	NOK	2	DMSO Control	0.001
J24	0	-0.00718661	NOK	2	Blank	0
K01	4	0.00634113	NOK	2	Blank	0
K02	31540	106.659	NOK	2	Side Car Control	1.69351e-10
K03	31640	106.997	NOK	2	SB 203580	4.57247e-09
K04	27476	92.9148	NOK	2	GSK-3 inhibitor IX	4.57247e-09
K05	33244	112.422	NOK	2	Olaparib (AZD2281)	4.57247e-09
K06	32200	108.891	NOK	2	(-)-Deguelin	4.57247e-09
K07	32200	108.891	NOK	2	Alsterpaullone	4.57247e-09
K08	35512	120.092	NOK	2	PARP Inhibitor XI, DR2313	4.57247e-09
K09	33832	114.41	NOK	2	TW-37	4.57247e-09
K10	35964	121.621	NOK	2	CI976	4.57247e-09
K11	31956	108.066	NOK	2	PI 3-Kalpha Inhibitor IV	4.57247e-09
K12	34912	118.063	NOK	2	AY 9944	4.57247e-09
K13	33072	111.84	NOK	2	Fludarabine Phosphate (Fludara)	4.57247e-09
K14	32072	108.458	NOK	2	1NM-PP1	4.57247e-09
K15	35128	118.793	NOK	2	Parbendazole	4.57247e-09
K16	33236	112.395	NOK	2	p38 MAP Kinase Inhibitor VI, JX401	4.57247e-09
K17	30700	103.818	NOK	2	EX 527	4.57247e-09
K18	36004	121.756	NOK	2	SB 218078;SB-218078	4.57247e-09
K19	33536	113.409	NOK	2	Isogranulatimide (Chk Inhibitor V)	4.57247e-09
K20	31584	106.808	NOK	2	(?)-Bay K 8644	4.57247e-09
K21	33400	112.949	NOK	2	BKM120 (NVP-BKM120)	4.57247e-09
K22	27740	93.8077	NOK	2	Midostaurin hydrate	4.57247e-09
K23	30876	104.413	NOK	2	DMSO Control	0.001
K24	0	-0.00718661	NOK	2	Blank	0
L01	0	-0.00718661	NOK	2	Blank	0
L02	29344	99.2323	NOK	2	Side Car Control	5.64503e-11
L03	32980	111.529	NOK	2	Etomoxir sodium salt	4.57247e-09
L04	30244	102.276	NOK	2	Fulvestrant	4.57247e-09
L05	33268	112.503	NOK	2	Necrostatin-7	4.57247e-09
L06	29552	99.9357	NOK	2	Anastrozole	4.57247e-09
L07	30260	102.33	NOK	2	GANT58;Hh/Gli Antagonist, GANT58	4.57247e-09
L08	31388	106.145	NOK	2	Celecoxib	4.57247e-09
L09	29656	100.287	NOK	2	Adenosine Kinase Inhibitor	4.57247e-09
L10	25548	86.3945	NOK	2	Dasatinib	4.57247e-09
L11	32596	110.23	NOK	2	17-AAG (Tanespimycin)	4.57247e-09
L12	35276	119.294	NOK	2	Pazopanib	4.57247e-09
L13	32452	109.743	NOK	2	HIF-1 Inhibitor	4.57247e-09
L14	36132	122.189	NOK	2	Imatinib	4.57247e-09
L15	32504	109.919	NOK	2	Protein Methyltransferase Inhibitor, AMI-5	4.57247e-09
L16	32576	110.163	NOK	2	Lapatinib	4.57247e-09
L17	33544	113.436	NOK	2	All-trans Retinoic Acid (Tretinoin)	4.57247e-09
L18	31912	107.917	NOK	2	Nilotinib	4.57247e-09
L19	33112	111.975	NOK	2	PP-121	4.57247e-09
L20	34388	116.291	NOK	2	Sorafenib	4.57247e-09
L21	33284	112.557	NOK	2	FGF Receptor Tyrosine Kinase Inhibitor	4.57247e-09
L22	30108	101.816	NOK	2	Lenalidomide	4.57247e-09
L23	32352	109.405	NOK	2	DMSO Control	0.001
L24	4	0.00634113	NOK	2	Blank	0
M01	0	-0.00718661	NOK	2	Blank	0
M02	27852	94.1865	NOK	2	Side Car Control	1.88168e-11
M03	30884	104.44	NOK	2	BEZ235 (NVP-BEZ235)	4.57247e-09
M04	26736	90.4122	NOK	2	BRD4132	4.57247e-09
M05	33216	112.327	NOK	2	Nutlin-3	4.57247e-09
M06	29256	98.9347	NOK	2	CCT128930	4.57247e-09
M07	29812	100.815	NOK	2	OSI-906 (Linsitinib)	4.57247e-09
M08	30684	103.764	NOK	2	Ivachtin	4.57247e-09
M09	29424	99.5029	NOK	2	SRT1720	4.57247e-09
M10	32080	108.485	NOK	2	MNS (3,4-Methylenedioxy-??-nitrostyrene)	4.57247e-09
M11	31628	106.957	NOK	2	JNJ 26854165 (Serdemetan)	4.57247e-09
M12	34596	116.994	NOK	2	Wortmannin	4.57247e-09
M13	29056	98.2583	NOK	2	2-Methoxyestradiol	4.57247e-09
M14	31312	105.888	NOK	2	Tacrolimus (FK506)	4.57247e-09
M15	32528	110	NOK	2	TSU-68	4.57247e-09
M16	28796	97.379	NOK	2	NVP-231	4.57247e-09
M17	31744	107.349	NOK	2	Fasudil HCl (HA-1077)	4.57247e-09
M18	28444	96.1886	NOK	2	FR 180204	4.57247e-09
M19	31568	106.754	NOK	2	Ki8751	4.57247e-09
M20	29844	100.923	NOK	2	GSK-3b Inhibitor XI	4.57247e-09
M21	30460	103.007	NOK	2	cx-4945 (Silmitasertib)	4.57247e-09
M22	21192	71.6628	NOK	2	Triptolide	4.57247e-09
M23	29512	99.8005	NOK	2	DMSO Control	0.001
M24	4	0.00634113	NOK	2	Blank	0
N01	0	-0.00718661	NOK	2	Blank	0
N02	28268	95.5933	NOK	2	Side Car Control	6.27225e-12
N03	30564	103.358	NOK	2	SID 26681509	4.57247e-09
N04	26832	90.7369	NOK	2	Raloxifene	4.57247e-09
N05	30316	102.52	NOK	2	Kenpaullone	4.57247e-09
N06	30700	103.818	NOK	2	Abiraterone	4.57247e-09
N07	27436	92.7796	NOK	2	PCI-24781	4.57247e-09
N08	32620	110.312	NOK	2	Sunitinib	4.57247e-09
N09	24864	84.0812	NOK	2	SMER28	4.57247e-09
N10	25732	87.0168	NOK	2	Afatinib	4.57247e-09
N11	30296	102.452	NOK	2	PD98059	4.57247e-09
N12	32400	109.567	NOK	2	Nelarabine	4.57247e-09
N13	28844	97.5413	NOK	2	BRD-K26531177	4.57247e-09
N14	33016	111.651	NOK	2	Vismodegib	4.57247e-09
N15	29684	100.382	NOK	2	PD 169316	4.57247e-09
N16	27988	94.6464	NOK	2	Ibrutinib	4.57247e-09
N17	31824	107.619	NOK	2	BRD-K20757673	4.57247e-09
N18	840	2.83364	NOK	2	Bortezomib	4.57247e-09
N19	30392	102.777	NOK	2	Tie2 kinase inhibitor	4.57247e-09
N20	31740	107.335	NOK	2	Axitinib	4.57247e-09
N21	28504	96.3915	NOK	2	BRD-K40109029	4.57247e-09
N22	20404	68.9978	NOK	2	Trametinib	4.57247e-09
N23	29340	99.2188	NOK	2	DMSO Control	0.001
N24	0	-0.00718661	NOK	2	Blank	0
O01	0	-0.00718661	NOK	2	Blank	0
O02	28680	96.9867	NOK	2	Side Car Control	2.09075e-12
O03	29948	101.275	NOK	2	AG 1295	4.57247e-09
O04	26468	89.5059	NOK	2	IKK-2 Inhibitor XI	4.57247e-09
O05	28788	97.3519	NOK	2	SL327	4.57247e-09
O06	29044	98.2177	NOK	2	UNC0321	4.57247e-09
O07	28016	94.7411	NOK	2	Oncrasin-1	4.57247e-09
O08	30240	102.263	NOK	2	Na+/H+ Exchanger Isoform-1 Inhibitor	4.57247e-09
O09	29652	100.274	NOK	2	YM155 (Sepantronium Bromide)	4.57247e-09
O10	29716	100.49	NOK	2	AEG 3482	4.57247e-09
O11	30512	103.182	NOK	2	Cerulenin,_Cephalosporium_caerulens	4.57247e-09
O12	31928	107.971	NOK	2	CCR2 Antagonist	4.57247e-09
O13	28972	97.9742	NOK	2	BMS-708163 (Avagacestat)	4.57247e-09
O14	30900	104.495	NOK	2	SR8278	4.57247e-09
O15	30040	101.586	NOK	2	Fasentin	4.57247e-09
O16	27552	93.1719	NOK	2	4-Hydroxyphenylretinamide	4.57247e-09
O17	29636	100.22	NOK	2	H 89 2HCl	4.57247e-09
O18	29116	98.4612	NOK	2	BI-87G3	4.57247e-09
O19	30092	101.762	NOK	2	JNK Inhibitor IX	4.57247e-09
O20	28608	96.7432	NOK	2	Akt Inhibitor IV	4.57247e-09
O21	29888	101.072	NOK	2	Forskolin	4.57247e-09
O22	26476	89.5329	NOK	2	Cdk/Crk Inhibitor	4.57247e-09
O23	29552	99.9357	NOK	2	DMSO Control	0.001
O24	4	0.00634113	NOK	2	Blank	0
P01	4	0.00634113	NOK	2	Blank	0
P02	25512	86.2727	NOK	2	Side Car Control	6.96917e-13
P03	28396	96.0262	NOK	2	OSI-930	4.57247e-09
P04	12576	42.524	NOK	2	Carfilzomib	4.57247e-09
P05	29408	99.4487	NOK	2	BRD-K88477136	4.57247e-09
P06	28900	97.7307	NOK	2	Ponatinib	4.57247e-09
P07	28636	96.8379	NOK	2	nifuroxazide	4.57247e-09
P08	30688	103.778	NOK	2	Vandetanib	4.57247e-09
P09	28436	96.1615	NOK	2	HA-1004	4.57247e-09
P10	27200	91.9814	NOK	2	Cabozantinib	4.57247e-09
P11	31592	106.835	NOK	2	BRD-A45107007	4.57247e-09
P12	29088	98.3665	NOK	2	Plerixafor	4.57247e-09
P13	28908	97.7578	NOK	2	BRD-K21894166	4.57247e-09
P14	32792	110.893	NOK	2	Vemurafenib	4.57247e-09
P15	28312	95.7421	NOK	2	nifedipine	4.57247e-09
P16	29212	98.7859	NOK	2	PCI-32765	4.57247e-09
P17	31156	105.36	NOK	2	BRD-K69577666	4.57247e-09
P18	28036	94.8087	NOK	2	Regorafenib	4.57247e-09
P19	29104	98.4206	NOK	2	NSC 74859	4.57247e-09
P20	29800	100.774	NOK	2	Dabrafenib	4.57247e-09
P21	29328	99.1782	NOK	2	roscovitine	4.57247e-09
P22	28488	96.3374	NOK	2	Pomalidomide	4.57247e-09
P23	31268	105.739	NOK	2	DMSO Control	0.001
P24	0	-0.00718661	NOK	2	Blank	0
A01	4	0.00471308	NOK	1	Blank	0
A02	1592	5.44789	NOK	1	Side Car Control	1e-05
A03	27792	95.2535	NOK	1	Acadesine	1.52416e-09
A04	25064	85.9027	NOK	1	10058-F4	1.52416e-09
A05	23836	81.6935	NOK	1	PD0325901	1.52416e-09
A06	28488	97.6392	NOK	1	APO866 (FK866)	1.52416e-09
A07	25528	87.4932	NOK	1	HA14-1	1.52416e-09
A08	26880	92.1274	NOK	1	NSC 23766	1.52416e-09
A09	27520	94.3212	NOK	1	LAQ824 (NVP-LAQ824, Dacinostat)	1.52416e-09
A10	28912	99.0925	NOK	1	PF-543	1.52416e-09
A11	29240	100.217	NOK	1	MLN8237 (Alisertib)	1.52416e-09
A12	29168	99.97	NOK	1	Betulinic acid	1.52416e-09
A13	25328	86.8077	NOK	1	BIBR1532	1.52416e-09
A14	30828	105.66	NOK	1	SMI-4a	1.52416e-09
A15	27868	95.514	NOK	1	PD173074	1.52416e-09
A16	27096	92.8678	NOK	1	WP1066	1.52416e-09
A17	28764	98.5852	NOK	1	Tosedostat (CHR2797)	1.52416e-09
A18	28196	96.6383	NOK	1	GM6001	1.52416e-09
A19	28768	98.5989	NOK	1	SP600125	1.52416e-09
A20	28396	97.3238	NOK	1	NH125	1.52416e-09
A21	27940	95.7608	NOK	1	Daidzein	1.52416e-09
A22	25936	88.8917	NOK	1	AZD7545	1.52416e-09
A23	25696	88.0691	NOK	1	DMSO Control	0.001
A24	0	-0.0089977	NOK	1	Blank	0
B01	4	0.00471308	NOK	1	Blank	0
B02	15416	52.8323	NOK	1	Side Car Control	3.33333e-06
B03	27800	95.2809	NOK	1	Chk2 Inhibitor	1.52416e-09
B04	27192	93.1969	NOK	1	Methotrexate	1.52416e-09
B05	26120	89.5224	NOK	1	PIM1/2 Kinase Inhibitor VI	1.52416e-09
B06	31912	109.376	NOK	1	Busulfan	1.52416e-09
B07	30876	105.825	NOK	1	indisulam	1.52416e-09
B08	29096	99.7232	NOK	1	Allopurinol	1.52416e-09
B09	28896	99.0377	NOK	1	SKF-96365, Hydrochloride	1.52416e-09
B10	30436	104.316	NOK	1	Chlorambucil	1.52416e-09
B11	28724	98.4481	NOK	1	STAT5 Inhibitor	1.52416e-09
B12	32524	111.473	NOK	1	Melphalan	1.52416e-09
B13	31080	106.524	NOK	1	PDGF RTK Inhibitor	1.52416e-09
B14	28916	99.1062	NOK	1	Altretamine	1.52416e-09
B15	33156	113.64	NOK	1	NSC632839	1.52416e-09
B16	30944	106.058	NOK	1	Aminolevulinic Acid	1.52416e-09
B17	30840	105.701	NOK	1	IKK-3 Inhibitor IX	1.52416e-09
B18	26956	92.3879	NOK	1	Fluorouracil	1.52416e-09
B19	30908	105.934	NOK	1	SB-202474	1.52416e-09
B20	30788	105.523	NOK	1	Pipobroman	1.52416e-09
B21	26368	90.3725	NOK	1	PKR Inhibitor	1.52416e-09
B22	25528	87.4932	NOK	1	Cyclophophamide	1.52416e-09
B23	26704	91.5242	NOK	1	DMSO Control	0.001
B24	4	0.00471308	NOK	1	Blank	0
C01	0	-0.0089977	NOK	1	Blank	0
C02	21300	73.0009	NOK	1	Side Car Control	1.11111e-06
C03	28604	98.0368	NOK	1	ABT-737	1.52416e-09
C04	24096	82.5847	NOK	1	Quercetagetin	1.52416e-09
C05	27556	94.4446	NOK	1	Perifosine (KRX-0401)	1.52416e-09
C06	29024	99.4764	NOK	1	ML-030	1.52416e-09
C07	29096	99.7232	NOK	1	SB 202190	1.52416e-09
C08	27532	94.3623	NOK	1	PI 3-Kgamma Inhibitor VII	1.52416e-09
C09	30704	105.235	NOK	1	U0126-EtOH	1.52416e-09
C10	29256	100.272	NOK	1	GSK-J1 (sodium salt)	1.52416e-09
C11	32140	110.157	NOK	1	Iniparib (BSI-201)	1.52416e-09
C12	29916	102.534	NOK	1	Tpl2 Kinase Inhibitor	1.52416e-09
C13	26284	90.0845	NOK	1	Melatonin	1.52416e-09
C14	34464	118.123	NOK	1	PF-750	1.52416e-09
C15	30104	103.178	NOK	1	ABT-888 (Veliparib)	1.52416e-09
C16	29164	99.9563	NOK	1	Rho Kinase Inhibitor II	1.52416e-09
C17	30952	106.085	NOK	1	XL765	1.52416e-09
C18	31428	107.717	NOK	1	Bexarotene	1.52416e-09
C19	29256	100.272	NOK	1	AZD6244 (Selumetinib)	1.52416e-09
C20	29712	101.835	NOK	1	Thyroid Hormone Receptor Antagonist, 1-850	1.52416e-09
C21	29856	102.328	NOK	1	LDE225 (NVP-LDE225, Erismodegib)	1.52416e-09
C22	25676	88.0005	NOK	1	GSK-LSD1 hydrochloride	1.52416e-09
C23	29128	99.8329	NOK	1	DMSO Control	0.001
C24	4	0.00471308	NOK	1	Blank	0
D01	0	-0.0089977	NOK	1	Blank	0
D02	25592	87.7126	NOK	1	Side Car Control	3.7037e-07
D03	32180	110.294	NOK	1	ERK Inhibitor II, Negative control	1.52416e-09
D04	27780	95.2124	NOK	1	Mitomycin C	1.52416e-09
D05	27624	94.6776	NOK	1	AA-COCF3	1.52416e-09
D06	28764	98.5852	NOK	1	Floxuridine	1.52416e-09
D07	24968	85.5737	NOK	1	VEGF Receptor 2 Kinase Inhibitor I	1.52416e-09
D08	31504	107.977	NOK	1	Hydroxyurea	1.52416e-09
D09	30800	105.564	NOK	1	Pentostatin	1.52416e-09
D10	31548	108.128	NOK	1	Uracil mustard	1.52416e-09
D11	24356	83.4759	NOK	1	GSK-3 Inhibitor XIII	1.52416e-09
D12	29316	100.477	NOK	1	Mitotane	1.52416e-09
D13	31792	108.964	NOK	1	importazole	1.52416e-09
D14	33988	116.491	NOK	1	Dacarbazine	1.52416e-09
D15	28748	98.5304	NOK	1	Secreted Frizzled Related Protein-1 Inhibitor	1.52416e-09
D16	31732	108.759	NOK	1	Methoxsalen	1.52416e-09
D17	34048	116.697	NOK	1	CD-1530	1.52416e-09
D18	20036	68.6683	NOK	1	Vinblastine	1.52416e-09
D19	30312	103.891	NOK	1	STAT3 Inhibitor IX, Cpd188	1.52416e-09
D20	32436	111.172	NOK	1	Thalidomide	1.52416e-09
D21	29468	100.998	NOK	1	Stem-Cell Factor/c-Kit Inhibitor, ISCK03	1.52416e-09
D22	18512	63.4445	NOK	1	Vincristine	1.52416e-09
D23	28696	98.3521	NOK	1	DMSO Control	0.001
D24	0	-0.0089977	NOK	1	Blank	0
E01	0	-0.0089977	NOK	1	Blank	0
E02	27736	95.0615	NOK	1	Side Car Control	1.23457e-07
E03	32636	111.857	NOK	1	Linifanib (ABT-869)	1.52416e-09
E04	27608	94.6228	NOK	1	(+)-JQ1	1.52416e-09
E05	31084	106.537	NOK	1	PI-103	1.52416e-09
E06	34328	117.657	NOK	1	Ciclopirox ethanolamine	1.52416e-09
E07	32292	110.678	NOK	1	MK-2206 dihydrochloride	1.52416e-09
E08	33172	113.694	NOK	1	Rofecoxib (Vioxx)	1.52416e-09
E09	32220	110.431	NOK	1	TAE684 (NVP-TAE684)	1.52416e-09
E10	33528	114.915	NOK	1	Dorsomorphin 2HCl	1.52416e-09
E11	34180	117.15	NOK	1	PLX-4720	1.52416e-09
E12	37164	127.378	NOK	1	Lomeguatrib	1.52416e-09
E13	30856	105.756	NOK	1	PIK-75	1.52416e-09
E14	35348	121.153	NOK	1	JSH-23	1.52416e-09
E15	28388	97.2964	NOK	1	GSK1059615	1.52416e-09
E16	31420	107.689	NOK	1	PD168393	1.52416e-09
E17	34404	117.917	NOK	1	MK-1775	1.52416e-09
E18	33544	114.97	NOK	1	ZM 336372	1.52416e-09
E19	29540	101.245	NOK	1	GSK429286A	1.52416e-09
E20	4096	14.0308	NOK	1	Romidepsin (FK228 ,depsipeptide)	1.52416e-09
E21	21900	75.0575	NOK	1	SB 743921	1.52416e-09
E22	28908	99.0788	NOK	1	Fedratinib (SAR302503, TG101348)	1.52416e-09
E23	28804	98.7223	NOK	1	DMSO Control	0.001
E24	4	0.00471308	NOK	1	Blank	0
F01	4	0.00471308	NOK	1	Blank	0
F02	27468	94.1429	NOK	1	Side Car Control	4.11523e-08
F03	34460	118.109	NOK	1	FGF/PDGF/VEGF RTK Inhibitor	1.52416e-09
F04	32956	112.954	NOK	1	Procarbazine	1.52416e-09
F05	34860	119.48	NOK	1	MST-312;Telomerase Inhibitor IX	1.52416e-09
F06	36216	124.128	NOK	1	Lomustine	1.52416e-09
F07	28380	97.269	NOK	1	p38 MAP Kinase Inhibitor V	1.52416e-09
F08	35664	122.236	NOK	1	Daunorubicin	1.52416e-09
F09	30524	104.618	NOK	1	PRL-3 Inhibitor I	1.52416e-09
F10	34308	117.588	NOK	1	Azacitidine	1.52416e-09
F11	32296	110.692	NOK	1	UCN-02 (PKC inhibitor)	1.52416e-09
F12	35256	120.838	NOK	1	Cladribine	1.52416e-09
F13	33368	114.366	NOK	1	ABT-263 (Navitoclax)	1.52416e-09
F14	33356	114.325	NOK	1	Ifosfamide	1.52416e-09
F15	32996	113.091	NOK	1	Vinorelbine Tartrate	1.52416e-09
F16	28060	96.1721	NOK	1	Tretinoin	1.52416e-09
F17	38480	131.889	NOK	1	Valinomycin,_Streptomyces_fulvissimus	1.52416e-09
F18	32524	111.473	NOK	1	Adriamycin	1.52416e-09
F19	33280	114.065	NOK	1	HNF4a napthofuran agonist "Compound 5"	1.52416e-09
F20	22220	76.1544	NOK	1	Paclitaxel	1.52416e-09
F21	29992	102.794	NOK	1	Go6976	1.52416e-09
F22	33124	113.53	NOK	1	Decitabine	1.52416e-09
F23	29184	100.025	NOK	1	DMSO Control	0.001
F24	4	0.00471308	NOK	1	Blank	0
G01	4	0.00471308	NOK	1	Blank	0
G02	30184	103.453	NOK	1	Side Car Control	1.37174e-08
G03	32848	112.584	NOK	1	BMS-536924	1.52416e-09
G04	27704	94.9519	NOK	1	GMX-1778	1.52416e-09
G05	32072	109.924	NOK	1	Tandutinib (MLN518)	1.52416e-09
G06	29480	101.039	NOK	1	SCH 530348	1.52416e-09
G07	28920	99.1199	NOK	1	PF-04217903	1.52416e-09
G08	32020	109.746	NOK	1	RO-3306	1.52416e-09
G09	33720	115.573	NOK	1	GSK690693	1.52416e-09
G10	33188	113.749	NOK	1	SD-208	1.52416e-09
G11	32968	112.995	NOK	1	IKK Inhibitor X	1.52416e-09
G12	25840	88.5626	NOK	1	Ixabepilone	1.52416e-09
G13	30416	104.248	NOK	1	YM201636	1.52416e-09
G14	33424	114.558	NOK	1	PF-4800567	1.52416e-09
G15	28124	96.3915	NOK	1	MGCD0103 (Mocetinostat)?	1.52416e-09
G16	28044	96.1173	NOK	1	CDDO-Me	1.52416e-09
G17	28648	98.1876	NOK	1	Quizartinib (AC220)	1.52416e-09
G18	34428	118	NOK	1	GSK269962A	1.52416e-09
G19	31372	107.525	NOK	1	Marimastat	1.52416e-09
G20	32652	111.912	NOK	1	BXL 628	1.52416e-09
G21	34632	118.699	NOK	1	SGI-1776 free base	1.52416e-09
G22	25308	86.7391	NOK	1	N9-isopropylolomoucine	1.52416e-09
G23	30016	102.877	NOK	1	DMSO Control	0.001
G24	4	0.00471308	NOK	1	Blank	0
H01	4	0.00471308	NOK	1	Blank	0
H02	30244	103.658	NOK	1	Side Car Control	4.57247e-09
H03	30812	105.605	NOK	1	isonicotinohydroxamic acid	1.52416e-09
H04	30176	103.425	NOK	1	Etoposide	1.52416e-09
H05	23612	80.9257	NOK	1	ML204	1.52416e-09
H06	29672	101.698	NOK	1	Tamoxifen	1.52416e-09
H07	19020	65.1858	NOK	1	mw-ctdd-3	1.52416e-09
H08	24384	83.5719	NOK	1	Rapamycin	1.52416e-09
H09	28148	96.4738	NOK	1	cytochalasin_B	1.52416e-09
H10	38272	131.176	NOK	1	Carboplatin	1.52416e-09
H11	32276	110.623	NOK	1	Glyburide (Diabeta)	1.52416e-09
H12	37692	129.188	NOK	1	Oxaliplatin	1.52416e-09
H13	31408	107.648	NOK	1	TPCA-1	1.52416e-09
H14	29608	101.478	NOK	1	Mitoxantrone	1.52416e-09
H15	32628	111.83	NOK	1	(5Z)-7-Oxozeaenol, Curvularia sp.	1.52416e-09
H16	29076	99.6547	NOK	1	Cytarabine	1.52416e-09
H17	36696	125.774	NOK	1	Nigericin	1.52416e-09
H18	33400	114.476	NOK	1	Amifostine	1.52416e-09
H19	33488	114.778	NOK	1	Wnt Antagonist I, IWR-1-endo	1.52416e-09
H20	31708	108.676	NOK	1	Temozolomide	1.52416e-09
H21	30232	103.617	NOK	1	Clioquinol	1.52416e-09
H22	28096	96.2955	NOK	1	Imiquimod	1.52416e-09
H23	31512	108.005	NOK	1	DMSO Control	0.001
H24	0	-0.0089977	NOK	1	Blank	0
I01	0	-0.0089977	NOK	1	Blank	0
I02	30812	105.605	NOK	1	Side Car Control	1.52416e-09
I03	32900	112.762	NOK	1	Saracatinib (AZD0530)	1.52416e-09
I04	27768	95.1712	NOK	1	ML083	1.52416e-09
I05	31216	106.99	NOK	1	Trichostatin A (TSA)	1.52416e-09
I06	31036	106.373	NOK	1	Lithium_Chloride,_MB_Grade	1.52416e-09
I07	31120	106.661	NOK	1	Refametinib (RDEA119, Bay 86-9766)	1.52416e-09
I08	34748	119.097	NOK	1	AG-690/36107028	1.52416e-09
I09	28596	98.0094	NOK	1	Triciribine (Triciribine phosphate)	1.52416e-09
I10	33740	115.641	NOK	1	A66	1.52416e-09
I11	33628	115.258	NOK	1	AT13387	1.52416e-09
I12	35864	122.922	NOK	1	BRD9647	1.52416e-09
I13	31600	108.306	NOK	1	Cimetidine (Tagamet)	1.52416e-09
I14	36452	124.937	NOK	1	StemRegenin 1	1.52416e-09
I15	32364	110.925	NOK	1	Sildenafil citrate	1.52416e-09
I16	30164	103.384	NOK	1	ARQ 197 (Tivantinib)	1.52416e-09
I17	36120	123.799	NOK	1	AZD7762	1.52416e-09
I18	30312	103.891	NOK	1	IOX1	1.52416e-09
I19	34632	118.699	NOK	1	BX-795	1.52416e-09
I20	32036	109.801	NOK	1	SB 225002;SB-225002	1.52416e-09
I21	33828	115.943	NOK	1	BI6727 (Volasertib)	1.52416e-09
I22	28620	98.0916	NOK	1	BIX01294	1.52416e-09
I23	30920	105.975	NOK	1	DMSO Control	0.001
I24	0	-0.0089977	NOK	1	Blank	0
J01	4	0.00471308	NOK	1	Blank	0
J02	28204	96.6657	NOK	1	Side Car Control	5.08053e-10
J03	29348	100.587	NOK	1	ELCPK	1.52416e-09
J04	26768	91.7435	NOK	1	Carmustine	1.52416e-09
J05	30052	103	NOK	1	PDGFR Tyrosine Kinase Inhibitor VII	1.52416e-09
J06	31344	107.429	NOK	1	Clofarabine	1.52416e-09
J07	33396	114.462	NOK	1	Indomethacin (Indocid, Indocin)	1.52416e-09
J08	26584	91.1128	NOK	1	Topotecan	1.52416e-09
J09	30856	105.756	NOK	1	NF449	1.52416e-09
J10	22836	78.2658	NOK	1	Gemcitabine	1.52416e-09
J11	32152	110.198	NOK	1	UNC0642	1.52416e-09
J12	32792	112.392	NOK	1	Irinotecan	1.52416e-09
J13	32936	112.886	NOK	1	Myoseverin	1.52416e-09
J14	25372	86.9585	NOK	1	Docetaxel	1.52416e-09
J15	30828	105.66	NOK	1	NSC401077	1.52416e-09
J16	35332	121.098	NOK	1	Vorinostat	1.52416e-09
J17	31744	108.8	NOK	1	NF-kB Activation Inhibitor IV	1.52416e-09
J18	32296	110.692	NOK	1	Exemestane	1.52416e-09
J19	30040	102.959	NOK	1	TGX-221	1.52416e-09
J20	32276	110.623	NOK	1	Gefitinib	1.52416e-09
J21	30016	102.877	NOK	1	Semagacestat (LY450139)	1.52416e-09
J22	30608	104.906	NOK	1	Erlotinib	1.52416e-09
J23	29320	100.491	NOK	1	DMSO Control	0.001
J24	4	0.00471308	NOK	1	Blank	0
K01	0	-0.0089977	NOK	1	Blank	0
K02	30660	105.084	NOK	1	Side Car Control	1.69351e-10
K03	32812	112.461	NOK	1	SB 203580	1.52416e-09
K04	28404	97.3512	NOK	1	GSK-3 inhibitor IX	1.52416e-09
K05	33076	113.365	NOK	1	Olaparib (AZD2281)	1.52416e-09
K06	30996	106.236	NOK	1	(-)-Deguelin	1.52416e-09
K07	32604	111.748	NOK	1	Alsterpaullone	1.52416e-09
K08	33944	116.341	NOK	1	PARP Inhibitor XI, DR2313	1.52416e-09
K09	34212	117.259	NOK	1	TW-37	1.52416e-09
K10	33104	113.461	NOK	1	CI976	1.52416e-09
K11	35424	121.414	NOK	1	PI 3-Kalpha Inhibitor IV	1.52416e-09
K12	36312	124.457	NOK	1	AY 9944	1.52416e-09
K13	29236	100.203	NOK	1	Fludarabine Phosphate (Fludara)	1.52416e-09
K14	37920	129.969	NOK	1	1NM-PP1	1.52416e-09
K15	33636	115.285	NOK	1	Parbendazole	1.52416e-09
K16	31992	109.65	NOK	1	p38 MAP Kinase Inhibitor VI, JX401	1.52416e-09
K17	29068	99.6272	NOK	1	EX 527	1.52416e-09
K18	32564	111.61	NOK	1	SB 218078;SB-218078	1.52416e-09
K19	31980	109.609	NOK	1	Isogranulatimide (Chk Inhibitor V)	1.52416e-09
K20	31876	109.252	NOK	1	(?)-Bay K 8644	1.52416e-09
K21	32092	109.993	NOK	1	BKM120 (NVP-BKM120)	1.52416e-09
K22	26988	92.4976	NOK	1	Midostaurin hydrate	1.52416e-09
K23	29860	102.342	NOK	1	DMSO Control	0.001
K24	4	0.00471308	NOK	1	Blank	0
L01	4	0.00471308	NOK	1	Blank	0
L02	27596	94.5817	NOK	1	Side Car Control	5.64503e-11
L03	33420	114.545	NOK	1	Etomoxir sodium salt	1.52416e-09
L04	29112	99.7781	NOK	1	Fulvestrant	1.52416e-09
L05	32844	112.57	NOK	1	Necrostatin-7	1.52416e-09
L06	32112	110.061	NOK	1	Anastrozole	1.52416e-09
L07	31832	109.101	NOK	1	GANT58;Hh/Gli Antagonist, GANT58	1.52416e-09
L08	32080	109.951	NOK	1	Celecoxib	1.52416e-09
L09	33400	114.476	NOK	1	Adenosine Kinase Inhibitor	1.52416e-09
L10	30280	103.782	NOK	1	Dasatinib	1.52416e-09
L11	32380	110.98	NOK	1	17-AAG (Tanespimycin)	1.52416e-09
L12	34064	116.752	NOK	1	Pazopanib	1.52416e-09
L13	30944	106.058	NOK	1	HIF-1 Inhibitor	1.52416e-09
L14	33048	113.269	NOK	1	Imatinib	1.52416e-09
L15	30456	104.385	NOK	1	Protein Methyltransferase Inhibitor, AMI-5	1.52416e-09
L16	29312	100.464	NOK	1	Lapatinib	1.52416e-09
L17	33024	113.187	NOK	1	All-trans Retinoic Acid (Tretinoin)	1.52416e-09
L18	32080	109.951	NOK	1	Nilotinib	1.52416e-09
L19	33020	113.173	NOK	1	PP-121	1.52416e-09
L20	32496	111.377	NOK	1	Sorafenib	1.52416e-09
L21	30088	103.123	NOK	1	FGF Receptor Tyrosine Kinase Inhibitor	1.52416e-09
L22	27984	95.9116	NOK	1	Lenalidomide	1.52416e-09
L23	31004	106.263	NOK	1	DMSO Control	0.001
L24	4	0.00471308	NOK	1	Blank	0
M01	4	0.00471308	NOK	1	Blank	0
M02	29808	102.164	NOK	1	Side Car Control	1.88168e-11
M03	28512	97.7214	NOK	1	BEZ235 (NVP-BEZ235)	1.52416e-09
M04	27284	93.5122	NOK	1	BRD4132	1.52416e-09
M05	31200	106.935	NOK	1	Nutlin-3	1.52416e-09
M06	28844	98.8594	NOK	1	CCT128930	1.52416e-09
M07	29816	102.191	NOK	1	OSI-906 (Linsitinib)	1.52416e-09
M08	30480	104.467	NOK	1	Ivachtin	1.52416e-09
M09	28544	97.8311	NOK	1	SRT1720	1.52416e-09
M10	31444	107.771	NOK	1	MNS (3,4-Methylenedioxy-??-nitrostyrene)	1.52416e-09
M11	29336	100.546	NOK	1	JNJ 26854165 (Serdemetan)	1.52416e-09
M12	33080	113.379	NOK	1	Wortmannin	1.52416e-09
M13	28376	97.2553	NOK	1	2-Methoxyestradiol	1.52416e-09
M14	32448	111.213	NOK	1	Tacrolimus (FK506)	1.52416e-09
M15	29216	100.135	NOK	1	TSU-68	1.52416e-09
M16	32016	109.732	NOK	1	NVP-231	1.52416e-09
M17	33540	114.956	NOK	1	Fasudil HCl (HA-1077)	1.52416e-09
M18	28932	99.1611	NOK	1	FR 180204	1.52416e-09
M19	30440	104.33	NOK	1	Ki8751	1.52416e-09
M20	28372	97.2416	NOK	1	GSK-3b Inhibitor XI	1.52416e-09
M21	29076	99.6547	NOK	1	cx-4945 (Silmitasertib)	1.52416e-09
M22	22548	77.2787	NOK	1	Triptolide	1.52416e-09
M23	28884	98.9965	NOK	1	DMSO Control	0.001
M24	0	-0.0089977	NOK	1	Blank	0
N01	4	0.00471308	NOK	1	Blank	0
N02	26032	89.2208	NOK	1	Side Car Control	6.27225e-12
N03	28824	98.7909	NOK	1	SID 26681509	1.52416e-09
N04	25344	86.8625	NOK	1	Raloxifene	1.52416e-09
N05	30112	103.206	NOK	1	Kenpaullone	1.52416e-09
N06	30712	105.262	NOK	1	Abiraterone	1.52416e-09
N07	27104	92.8952	NOK	1	PCI-24781	1.52416e-09
N08	32396	111.035	NOK	1	Sunitinib	1.52416e-09
N09	25948	88.9328	NOK	1	SMER28	1.52416e-09
N10	30012	102.863	NOK	1	Afatinib	1.52416e-09
N11	30100	103.165	NOK	1	PD98059	1.52416e-09
N12	31412	107.662	NOK	1	Nelarabine	1.52416e-09
N13	29084	99.6821	NOK	1	BRD-K26531177	1.52416e-09
N14	31048	106.414	NOK	1	Vismodegib	1.52416e-09
N15	29652	101.629	NOK	1	PD 169316	1.52416e-09
N16	27248	93.3888	NOK	1	Ibrutinib	1.52416e-09
N17	31788	108.951	NOK	1	BRD-K20757673	1.52416e-09
N18	1512	5.17368	NOK	1	Bortezomib	1.52416e-09
N19	28812	98.7497	NOK	1	Tie2 kinase inhibitor	1.52416e-09
N20	29112	99.7781	NOK	1	Axitinib	1.52416e-09
N21	29328	100.518	NOK	1	BRD-K40109029	1.52416e-09
N22	22868	78.3755	NOK	1	Trametinib	1.52416e-09
N23	29188	100.039	NOK	1	DMSO Control	0.001
N24	4	0.00471308	NOK	1	Blank	0
O01	4	0.00471308	NOK	1	Blank	0
O02	26968	92.4291	NOK	1	Side Car Control	2.09075e-12
O03	28576	97.9408	NOK	1	AG 1295	1.52416e-09
O04	26280	90.0708	NOK	1	IKK-2 Inhibitor XI	1.52416e-09
O05	29096	99.7232	NOK	1	SL327	1.52416e-09
O06	28516	97.7352	NOK	1	UNC0321	1.52416e-09
O07	26624	91.25	NOK	1	Oncrasin-1	1.52416e-09
O08	28556	97.8723	NOK	1	Na+/H+ Exchanger Isoform-1 Inhibitor	1.52416e-09
O09	28924	99.1337	NOK	1	YM155 (Sepantronium Bromide)	1.52416e-09
O10	27844	95.4317	NOK	1	AEG 3482	1.52416e-09
O11	28908	99.0788	NOK	1	Cerulenin,_Cephalosporium_caerulens	1.52416e-09
O12	31880	109.266	NOK	1	CCR2 Antagonist	1.52416e-09
O13	25936	88.8917	NOK	1	BMS-708163 (Avagacestat)	1.52416e-09
O14	31684	108.594	NOK	1	SR8278	1.52416e-09
O15	27972	95.8705	NOK	1	Fasentin	1.52416e-09
O16	27232	93.334	NOK	1	4-Hydroxyphenylretinamide	1.52416e-09
O17	31120	106.661	NOK	1	H 89 2HCl	1.52416e-09
O18	28896	99.0377	NOK	1	BI-87G3	1.52416e-09
O19	28356	97.1867	NOK	1	JNK Inhibitor IX	1.52416e-09
O20	29844	102.287	NOK	1	Akt Inhibitor IV	1.52416e-09
O21	28508	97.7077	NOK	1	Forskolin	1.52416e-09
O22	26460	90.6878	NOK	1	Cdk/Crk Inhibitor	1.52416e-09
O23	28932	99.1611	NOK	1	DMSO Control	0.001
O24	4	0.00471308	NOK	1	Blank	0
P01	4	0.00471308	NOK	1	Blank	0
P02	25784	88.3707	NOK	1	Side Car Control	6.96917e-13
P03	28748	98.5304	NOK	1	OSI-930	1.52416e-09
P04	18932	64.8841	NOK	1	Carfilzomib	1.52416e-09
P05	29868	102.369	NOK	1	BRD-K88477136	1.52416e-09
P06	27628	94.6914	NOK	1	Ponatinib	1.52416e-09
P07	26376	90.3999	NOK	1	nifuroxazide	1.52416e-09
P08	31336	107.401	NOK	1	Vandetanib	1.52416e-09
P09	27008	92.5662	NOK	1	HA-1004	1.52416e-09
P10	31064	106.469	NOK	1	Cabozantinib	1.52416e-09
P11	29460	100.971	NOK	1	BRD-A45107007	1.52416e-09
P12	29048	99.5587	NOK	1	Plerixafor	1.52416e-09
P13	28636	98.1465	NOK	1	BRD-K21894166	1.52416e-09
P14	31568	108.196	NOK	1	Vemurafenib	1.52416e-09
P15	25896	88.7546	NOK	1	nifedipine	1.52416e-09
P16	28328	97.0907	NOK	1	PCI-32765	1.52416e-09
P17	29708	101.821	NOK	1	BRD-K69577666	1.52416e-09
P18	28020	96.035	NOK	1	Regorafenib	1.52416e-09
P19	27628	94.6914	NOK	1	NSC 74859	1.52416e-09
P20	29664	101.67	NOK	1	Dabrafenib	1.52416e-09
P21	29136	99.8603	NOK	1	roscovitine	1.52416e-09
P22	27300	93.5671	NOK	1	Pomalidomide	1.52416e-09
P23	28980	99.3256	NOK	1	DMSO Control	0.001
P24	0	-0.0089977	NOK	1	Blank	0
A01	0	-0.00778782	NOK	2	Blank	0
A02	2216	7.66235	NOK	2	Side Car Control	1e-05
A03	25516	88.3096	NOK	2	Acadesine	1.52416e-09
A04	23676	81.9409	NOK	2	10058-F4	1.52416e-09
A05	23412	81.0271	NOK	2	PD0325901	1.52416e-09
A06	26512	91.757	NOK	2	APO866 (FK866)	1.52416e-09
A07	26668	92.297	NOK	2	HA14-1	1.52416e-09
A08	26712	92.4493	NOK	2	NSC 23766	1.52416e-09
A09	24568	85.0283	NOK	2	LAQ824 (NVP-LAQ824, Dacinostat)	1.52416e-09
A10	28696	99.3164	NOK	2	PF-543	1.52416e-09
A11	29932	103.595	NOK	2	MLN8237 (Alisertib)	1.52416e-09
A12	31444	108.828	NOK	2	Betulinic acid	1.52416e-09
A13	28740	99.4687	NOK	2	BIBR1532	1.52416e-09
A14	29500	102.099	NOK	2	SMI-4a	1.52416e-09
A15	29484	102.044	NOK	2	PD173074	1.52416e-09
A16	29496	102.085	NOK	2	WP1066	1.52416e-09
A17	29624	102.528	NOK	2	Tosedostat (CHR2797)	1.52416e-09
A18	31636	109.492	NOK	2	GM6001	1.52416e-09
A19	27644	95.6752	NOK	2	SP600125	1.52416e-09
A20	29772	103.041	NOK	2	NH125	1.52416e-09
A21	27884	96.5059	NOK	2	Daidzein	1.52416e-09
A22	24096	83.3946	NOK	2	AZD7545	1.52416e-09
A23	26384	91.314	NOK	2	DMSO Control	0.001
A24	4	0.0060572	NOK	2	Blank	0
B01	4	0.0060572	NOK	2	Blank	0
B02	15156	52.451	NOK	2	Side Car Control	3.33333e-06
B03	25752	89.1265	NOK	2	Chk2 Inhibitor	1.52416e-09
B04	26856	92.9477	NOK	2	Methotrexate	1.52416e-09
B05	24132	83.5192	NOK	2	PIM1/2 Kinase Inhibitor VI	1.52416e-09
B06	27196	94.1245	NOK	2	Busulfan	1.52416e-09
B07	28896	100.009	NOK	2	indisulam	1.52416e-09
B08	30860	106.807	NOK	2	Allopurinol	1.52416e-09
B09	30416	105.27	NOK	2	SKF-96365, Hydrochloride	1.52416e-09
B10	29956	103.678	NOK	2	Chlorambucil	1.52416e-09
B11	29052	100.549	NOK	2	STAT5 Inhibitor	1.52416e-09
B12	28720	99.3995	NOK	2	Melphalan	1.52416e-09
B13	31524	109.105	NOK	2	PDGF RTK Inhibitor	1.52416e-09
B14	30984	107.236	NOK	2	Altretamine	1.52416e-09
B15	31560	109.229	NOK	2	NSC632839	1.52416e-09
B16	27120	93.8615	NOK	2	Aminolevulinic Acid	1.52416e-09
B17	31844	110.212	NOK	2	IKK-3 Inhibitor IX	1.52416e-09
B18	27472	95.0798	NOK	2	Fluorouracil	1.52416e-09
B19	29812	103.179	NOK	2	SB-202474	1.52416e-09
B20	29164	100.936	NOK	2	Pipobroman	1.52416e-09
B21	31252	108.163	NOK	2	PKR Inhibitor	1.52416e-09
B22	29296	101.393	NOK	2	Cyclophophamide	1.52416e-09
B23	27660	95.7305	NOK	2	DMSO Control	0.001
B24	0	-0.00778782	NOK	2	Blank	0
C01	4	0.0060572	NOK	2	Blank	0
C02	19252	66.6283	NOK	2	Side Car Control	1.11111e-06
C03	27784	96.1597	NOK	2	ABT-737	1.52416e-09
C04	25812	89.3341	NOK	2	Quercetagetin	1.52416e-09
C05	28804	99.6902	NOK	2	Perifosine (KRX-0401)	1.52416e-09
C06	29436	101.878	NOK	2	ML-030	1.52416e-09
C07	28092	97.2258	NOK	2	SB 202190	1.52416e-09
C08	29396	101.739	NOK	2	PI 3-Kgamma Inhibitor VII	1.52416e-09
C09	28232	97.7104	NOK	2	U0126-EtOH	1.52416e-09
C10	32484	112.428	NOK	2	GSK-J1 (sodium salt)	1.52416e-09
C11	29128	100.812	NOK	2	Iniparib (BSI-201)	1.52416e-09
C12	30676	106.17	NOK	2	Tpl2 Kinase Inhibitor	1.52416e-09
C13	30064	104.051	NOK	2	Melatonin	1.52416e-09
C14	28712	99.3718	NOK	2	PF-750	1.52416e-09
C15	30000	103.83	NOK	2	ABT-888 (Veliparib)	1.52416e-09
C16	28980	100.299	NOK	2	Rho Kinase Inhibitor II	1.52416e-09
C17	29476	102.016	NOK	2	XL765	1.52416e-09
C18	30168	104.411	NOK	2	Bexarotene	1.52416e-09
C19	28720	99.3995	NOK	2	AZD6244 (Selumetinib)	1.52416e-09
C20	28852	99.8564	NOK	2	Thyroid Hormone Receptor Antagonist, 1-850	1.52416e-09
C21	28508	98.6657	NOK	2	LDE225 (NVP-LDE225, Erismodegib)	1.52416e-09
C22	26216	90.7325	NOK	2	GSK-LSD1 hydrochloride	1.52416e-09
C23	27324	94.5676	NOK	2	DMSO Control	0.001
C24	4	0.0060572	NOK	2	Blank	0
D01	0	-0.00778782	NOK	2	Blank	0
D02	25556	88.4481	NOK	2	Side Car Control	3.7037e-07
D03	30252	104.702	NOK	2	ERK Inhibitor II, Negative control	1.52416e-09
D04	25700	88.9465	NOK	2	Mitomycin C	1.52416e-09
D05	27360	94.6922	NOK	2	AA-COCF3	1.52416e-09
D06	30728	106.35	NOK	2	Floxuridine	1.52416e-09
D07	27568	95.4121	NOK	2	VEGF Receptor 2 Kinase Inhibitor I	1.52416e-09
D08	29900	103.484	NOK	2	Hydroxyurea	1.52416e-09
D09	32752	113.355	NOK	2	Pentostatin	1.52416e-09
D10	32496	112.469	NOK	2	Uracil mustard	1.52416e-09
D11	32508	112.511	NOK	2	GSK-3 Inhibitor XIII	1.52416e-09
D12	31504	109.036	NOK	2	Mitotane	1.52416e-09
D13	30160	104.384	NOK	2	importazole	1.52416e-09
D14	30156	104.37	NOK	2	Dacarbazine	1.52416e-09
D15	30192	104.494	NOK	2	Secreted Frizzled Related Protein-1 Inhibitor	1.52416e-09
D16	29612	102.487	NOK	2	Methoxsalen	1.52416e-09
D17	32084	111.043	NOK	2	CD-1530	1.52416e-09
D18	20488	70.9064	NOK	2	Vinblastine	1.52416e-09
D19	28060	97.115	NOK	2	STAT3 Inhibitor IX, Cpd188	1.52416e-09
D20	31168	107.873	NOK	2	Thalidomide	1.52416e-09
D21	29016	100.424	NOK	2	Stem-Cell Factor/c-Kit Inhibitor, ISCK03	1.52416e-09
D22	17032	58.9443	NOK	2	Vincristine	1.52416e-09
D23	25976	89.9018	NOK	2	DMSO Control	0.001
D24	0	-0.00778782	NOK	2	Blank	0
E01	4	0.0060572	NOK	2	Blank	0
E02	28488	98.5965	NOK	2	Side Car Control	1.23457e-07
E03	29800	103.138	NOK	2	Linifanib (ABT-869)	1.52416e-09
E04	28284	97.8904	NOK	2	(+)-JQ1	1.52416e-09
E05	29876	103.401	NOK	2	PI-103	1.52416e-09
E06	32952	114.048	NOK	2	Ciclopirox ethanolamine	1.52416e-09
E07	32288	111.749	NOK	2	MK-2206 dihydrochloride	1.52416e-09
E08	31412	108.717	NOK	2	Rofecoxib (Vioxx)	1.52416e-09
E09	34360	118.921	NOK	2	TAE684 (NVP-TAE684)	1.52416e-09
E10	33720	116.706	NOK	2	Dorsomorphin 2HCl	1.52416e-09
E11	34228	118.464	NOK	2	PLX-4720	1.52416e-09
E12	33868	117.218	NOK	2	Lomeguatrib	1.52416e-09
E13	33188	114.864	NOK	2	PIK-75	1.52416e-09
E14	32968	114.103	NOK	2	JSH-23	1.52416e-09
E15	29692	102.764	NOK	2	GSK1059615	1.52416e-09
E16	32144	111.251	NOK	2	PD168393	1.52416e-09
E17	35396	122.507	NOK	2	MK-1775	1.52416e-09
E18	32888	113.826	NOK	2	ZM 336372	1.52416e-09
E19	29168	100.95	NOK	2	GSK429286A	1.52416e-09
E20	4312	14.9171	NOK	2	Romidepsin (FK228 ,depsipeptide)	1.52416e-09
E21	21300	73.717	NOK	2	SB 743921	1.52416e-09
E22	28732	99.441	NOK	2	Fedratinib (SAR302503, TG101348)	1.52416e-09
E23	32128	111.195	NOK	2	DMSO Control	0.001
E24	4	0.0060572	NOK	2	Blank	0
F01	4	0.0060572	NOK	2	Blank	0
F02	30204	104.536	NOK	2	Side Car Control	4.11523e-08
F03	34172	118.27	NOK	2	FGF/PDGF/VEGF RTK Inhibitor	1.52416e-09
F04	32824	113.604	NOK	2	Procarbazine	1.52416e-09
F05	33900	117.329	NOK	2	MST-312;Telomerase Inhibitor IX	1.52416e-09
F06	35444	122.673	NOK	2	Lomustine	1.52416e-09
F07	32568	112.718	NOK	2	p38 MAP Kinase Inhibitor V	1.52416e-09
F08	33924	117.412	NOK	2	Daunorubicin	1.52416e-09
F09	32816	113.577	NOK	2	PRL-3 Inhibitor I	1.52416e-09
F10	32164	111.32	NOK	2	Azacitidine	1.52416e-09
F11	34584	119.696	NOK	2	UCN-02 (PKC inhibitor)	1.52416e-09
F12	32652	113.009	NOK	2	Cladribine	1.52416e-09
F13	31132	107.748	NOK	2	ABT-263 (Navitoclax)	1.52416e-09
F14	31220	108.053	NOK	2	Ifosfamide	1.52416e-09
F15	34388	119.018	NOK	2	Vinorelbine Tartrate	1.52416e-09
F16	28920	100.092	NOK	2	Tretinoin	1.52416e-09
F17	35220	121.898	NOK	2	Valinomycin,_Streptomyces_fulvissimus	1.52416e-09
F18	32220	111.514	NOK	2	Adriamycin	1.52416e-09
F19	34160	118.229	NOK	2	HNF4a napthofuran agonist "Compound 5"	1.52416e-09
F20	21344	73.8693	NOK	2	Paclitaxel	1.52416e-09
F21	32604	112.843	NOK	2	Go6976	1.52416e-09
F22	31344	108.482	NOK	2	Decitabine	1.52416e-09
F23	27876	96.4782	NOK	2	DMSO Control	0.001
F24	4	0.0060572	NOK	2	Blank	0
G01	4	0.0060572	NOK	2	Blank	0
G02	30452	105.394	NOK	2	Side Car Control	1.37174e-08
G03	31192	107.956	NOK	2	BMS-536924	1.52416e-09
G04	27752	96.049	NOK	2	GMX-1778	1.52416e-09
G05	31020	107.36	NOK	2	Tandutinib (MLN518)	1.52416e-09
G06	29136	100.839	NOK	2	SCH 530348	1.52416e-09
G07	26948	93.2661	NOK	2	PF-04217903	1.52416e-09
G08	29948	103.65	NOK	2	RO-3306	1.52416e-09
G09	33964	117.55	NOK	2	GSK690693	1.52416e-09
G10	35804	123.919	NOK	2	SD-208	1.52416e-09
G11	32856	113.715	NOK	2	IKK Inhibitor X	1.52416e-09
G12	23724	82.107	NOK	2	Ixabepilone	1.52416e-09
G13	29472	102.002	NOK	2	YM201636	1.52416e-09
G14	37088	128.363	NOK	2	PF-4800567	1.52416e-09
G15	35048	121.302	NOK	2	MGCD0103 (Mocetinostat)?	1.52416e-09
G16	27292	94.4568	NOK	2	CDDO-Me	1.52416e-09
G17	31028	107.388	NOK	2	Quizartinib (AC220)	1.52416e-09
G18	33436	115.723	NOK	2	GSK269962A	1.52416e-09
G19	30288	104.827	NOK	2	Marimastat	1.52416e-09
G20	32464	112.358	NOK	2	BXL 628	1.52416e-09
G21	33092	114.532	NOK	2	SGI-1776 free base	1.52416e-09
G22	25452	88.0881	NOK	2	N9-isopropylolomoucine	1.52416e-09
G23	31128	107.734	NOK	2	DMSO Control	0.001
G24	0	-0.00778782	NOK	2	Blank	0
H01	0	-0.00778782	NOK	2	Blank	0
H02	27220	94.2076	NOK	2	Side Car Control	4.57247e-09
H03	31468	108.911	NOK	2	isonicotinohydroxamic acid	1.52416e-09
H04	29696	102.778	NOK	2	Etoposide	1.52416e-09
H05	20764	71.8617	NOK	2	ML204	1.52416e-09
H06	30916	107	NOK	2	Tamoxifen	1.52416e-09
H07	21144	73.177	NOK	2	mw-ctdd-3	1.52416e-09
H08	25796	89.2788	NOK	2	Rapamycin	1.52416e-09
H09	29852	103.318	NOK	2	cytochalasin_B	1.52416e-09
H10	35744	123.711	NOK	2	Carboplatin	1.52416e-09
H11	35328	122.271	NOK	2	Glyburide (Diabeta)	1.52416e-09
H12	36672	126.923	NOK	2	Oxaliplatin	1.52416e-09
H13	32848	113.688	NOK	2	TPCA-1	1.52416e-09
H14	34296	118.699	NOK	2	Mitoxantrone	1.52416e-09
H15	34576	119.669	NOK	2	(5Z)-7-Oxozeaenol, Curvularia sp.	1.52416e-09
H16	28084	97.1981	NOK	2	Cytarabine	1.52416e-09
H17	33532	116.055	NOK	2	Nigericin	1.52416e-09
H18	31956	110.6	NOK	2	Amifostine	1.52416e-09
H19	30700	106.253	NOK	2	Wnt Antagonist I, IWR-1-endo	1.52416e-09
H20	27584	95.4675	NOK	2	Temozolomide	1.52416e-09
H21	32164	111.32	NOK	2	Clioquinol	1.52416e-09
H22	29716	102.847	NOK	2	Imiquimod	1.52416e-09
H23	29552	102.279	NOK	2	DMSO Control	0.001
H24	0	-0.00778782	NOK	2	Blank	0
I01	4	0.0060572	NOK	2	Blank	0
I02	30024	103.913	NOK	2	Side Car Control	1.52416e-09
I03	27968	96.7966	NOK	2	Saracatinib (AZD0530)	1.52416e-09
I04	29924	103.567	NOK	2	ML083	1.52416e-09
I05	35620	123.282	NOK	2	Trichostatin A (TSA)	1.52416e-09
I06	32052	110.932	NOK	2	Lithium_Chloride,_MB_Grade	1.52416e-09
I07	30864	106.82	NOK	2	Refametinib (RDEA119, Bay 86-9766)	1.52416e-09
I08	33524	116.027	NOK	2	AG-690/36107028	1.52416e-09
I09	30256	104.716	NOK	2	Triciribine (Triciribine phosphate)	1.52416e-09
I10	31756	109.908	NOK	2	A66	1.52416e-09
I11	35112	121.524	NOK	2	AT13387	1.52416e-09
I12	35152	121.662	NOK	2	BRD9647	1.52416e-09
I13	33392	115.57	NOK	2	Cimetidine (Tagamet)	1.52416e-09
I14	37232	128.862	NOK	2	StemRegenin 1	1.52416e-09
I15	34004	117.689	NOK	2	Sildenafil citrate	1.52416e-09
I16	30104	104.19	NOK	2	ARQ 197 (Tivantinib)	1.52416e-09
I17	35944	124.404	NOK	2	AZD7762	1.52416e-09
I18	28204	97.6135	NOK	2	IOX1	1.52416e-09
I19	32148	111.265	NOK	2	BX-795	1.52416e-09
I20	32372	112.04	NOK	2	SB 225002;SB-225002	1.52416e-09
I21	32460	112.345	NOK	2	BI6727 (Volasertib)	1.52416e-09
I22	27452	95.0106	NOK	2	BIX01294	1.52416e-09
I23	32864	113.743	NOK	2	DMSO Control	0.001
I24	4	0.0060572	NOK	2	Blank	0
J01	4	0.0060572	NOK	2	Blank	0
J02	27252	94.3183	NOK	2	Side Car Control	5.08053e-10
J03	30164	104.398	NOK	2	ELCPK	1.52416e-09
J04	27964	96.7828	NOK	2	Carmustine	1.52416e-09
J05	32840	113.66	NOK	2	PDGFR Tyrosine Kinase Inhibitor VII	1.52416e-09
J06	29876	103.401	NOK	2	Clofarabine	1.52416e-09
J07	29788	103.096	NOK	2	Indomethacin (Indocid, Indocin)	1.52416e-09
J08	28584	98.9287	NOK	2	Topotecan	1.52416e-09
J09	31016	107.347	NOK	2	NF449	1.52416e-09
J10	22472	77.7735	NOK	2	Gemcitabine	1.52416e-09
J11	30884	106.89	NOK	2	UNC0642	1.52416e-09
J12	33020	114.283	NOK	2	Irinotecan	1.52416e-09
J13	32272	111.694	NOK	2	Myoseverin	1.52416e-09
J14	27584	95.4675	NOK	2	Docetaxel	1.52416e-09
J15	29928	103.581	NOK	2	NSC401077	1.52416e-09
J16	30420	105.284	NOK	2	Vorinostat	1.52416e-09
J17	29216	101.116	NOK	2	NF-kB Activation Inhibitor IV	1.52416e-09
J18	28576	98.9011	NOK	2	Exemestane	1.52416e-09
J19	31436	108.8	NOK	2	TGX-221	1.52416e-09
J20	31144	107.79	NOK	2	Gefitinib	1.52416e-09
J21	26952	93.28	NOK	2	Semagacestat (LY450139)	1.52416e-09
J22	29036	100.493	NOK	2	Erlotinib	1.52416e-09
J23	31368	108.565	NOK	2	DMSO Control	0.001
J24	4	0.0060572	NOK	2	Blank	0
K01	0	-0.00778782	NOK	2	Blank	0
K02	28992	100.341	NOK	2	Side Car Control	1.69351e-10
K03	34040	117.813	NOK	2	SB 203580	1.52416e-09
K04	26528	91.8124	NOK	2	GSK-3 inhibitor IX	1.52416e-09
K05	29468	101.988	NOK	2	Olaparib (AZD2281)	1.52416e-09
K06	31704	109.728	NOK	2	(-)-Deguelin	1.52416e-09
K07	31740	109.852	NOK	2	Alsterpaullone	1.52416e-09
K08	33484	115.889	NOK	2	PARP Inhibitor XI, DR2313	1.52416e-09
K09	33500	115.944	NOK	2	TW-37	1.52416e-09
K10	35468	122.756	NOK	2	CI976	1.52416e-09
K11	32696	113.161	NOK	2	PI 3-Kalpha Inhibitor IV	1.52416e-09
K12	34704	120.112	NOK	2	AY 9944	1.52416e-09
K13	29600	102.445	NOK	2	Fludarabine Phosphate (Fludara)	1.52416e-09
K14	33392	115.57	NOK	2	1NM-PP1	1.52416e-09
K15	28980	100.299	NOK	2	Parbendazole	1.52416e-09
K16	31392	108.648	NOK	2	p38 MAP Kinase Inhibitor VI, JX401	1.52416e-09
K17	33200	114.906	NOK	2	EX 527	1.52416e-09
K18	33080	114.491	NOK	2	SB 218078;SB-218078	1.52416e-09
K19	31220	108.053	NOK	2	Isogranulatimide (Chk Inhibitor V)	1.52416e-09
K20	31248	108.15	NOK	2	(?)-Bay K 8644	1.52416e-09
K21	32624	112.912	NOK	2	BKM120 (NVP-BKM120)	1.52416e-09
K22	26624	92.1447	NOK	2	Midostaurin hydrate	1.52416e-09
K23	30356	105.062	NOK	2	DMSO Control	0.001
K24	4	0.0060572	NOK	2	Blank	0
L01	0	-0.00778782	NOK	2	Blank	0
L02	28364	98.1673	NOK	2	Side Car Control	5.64503e-11
L03	28944	100.175	NOK	2	Etomoxir sodium salt	1.52416e-09
L04	30936	107.07	NOK	2	Fulvestrant	1.52416e-09
L05	29548	102.265	NOK	2	Necrostatin-7	1.52416e-09
L06	28864	99.8979	NOK	2	Anastrozole	1.52416e-09
L07	32288	111.749	NOK	2	GANT58;Hh/Gli Antagonist, GANT58	1.52416e-09
L08	30768	106.488	NOK	2	Celecoxib	1.52416e-09
L09	33100	114.56	NOK	2	Adenosine Kinase Inhibitor	1.52416e-09
L10	28060	97.115	NOK	2	Dasatinib	1.52416e-09
L11	32312	111.832	NOK	2	17-AAG (Tanespimycin)	1.52416e-09
L12	32180	111.375	NOK	2	Pazopanib	1.52416e-09
L13	31480	108.953	NOK	2	HIF-1 Inhibitor	1.52416e-09
L14	33116	114.615	NOK	2	Imatinib	1.52416e-09
L15	30696	106.239	NOK	2	Protein Methyltransferase Inhibitor, AMI-5	1.52416e-09
L16	27904	96.5751	NOK	2	Lapatinib	1.52416e-09
L17	33320	115.321	NOK	2	All-trans Retinoic Acid (Tretinoin)	1.52416e-09
L18	31680	109.645	NOK	2	Nilotinib	1.52416e-09
L19	31564	109.243	NOK	2	PP-121	1.52416e-09
L20	29964	103.705	NOK	2	Sorafenib	1.52416e-09
L21	30528	105.657	NOK	2	FGF Receptor Tyrosine Kinase Inhibitor	1.52416e-09
L22	29100	100.715	NOK	2	Lenalidomide	1.52416e-09
L23	30024	103.913	NOK	2	DMSO Control	0.001
L24	0	-0.00778782	NOK	2	Blank	0
M01	0	-0.00778782	NOK	2	Blank	0
M02	27032	93.5569	NOK	2	Side Car Control	1.88168e-11
M03	30736	106.377	NOK	2	BEZ235 (NVP-BEZ235)	1.52416e-09
M04	26800	92.7539	NOK	2	BRD4132	1.52416e-09
M05	29748	102.958	NOK	2	Nutlin-3	1.52416e-09
M06	27932	96.672	NOK	2	CCT128930	1.52416e-09
M07	27580	95.4536	NOK	2	OSI-906 (Linsitinib)	1.52416e-09
M08	32104	111.112	NOK	2	Ivachtin	1.52416e-09
M09	29996	103.816	NOK	2	SRT1720	1.52416e-09
M10	26012	90.0264	NOK	2	MNS (3,4-Methylenedioxy-??-nitrostyrene)	1.52416e-09
M11	30028	103.927	NOK	2	JNJ 26854165 (Serdemetan)	1.52416e-09
M12	32584	112.774	NOK	2	Wortmannin	1.52416e-09
M13	28712	99.3718	NOK	2	2-Methoxyestradiol	1.52416e-09
M14	30064	104.051	NOK	2	Tacrolimus (FK506)	1.52416e-09
M15	28972	100.272	NOK	2	TSU-68	1.52416e-09
M16	28712	99.3718	NOK	2	NVP-231	1.52416e-09
M17	32108	111.126	NOK	2	Fasudil HCl (HA-1077)	1.52416e-09
M18	28492	98.6103	NOK	2	FR 180204	1.52416e-09
M19	29636	102.57	NOK	2	Ki8751	1.52416e-09
M20	27368	94.7199	NOK	2	GSK-3b Inhibitor XI	1.52416e-09
M21	31584	109.313	NOK	2	cx-4945 (Silmitasertib)	1.52416e-09
M22	23164	80.1687	NOK	2	Triptolide	1.52416e-09
M23	27516	95.2321	NOK	2	DMSO Control	0.001
M24	4	0.0060572	NOK	2	Blank	0
N01	4	0.0060572	NOK	2	Blank	0
N02	25476	88.1712	NOK	2	Side Car Control	6.27225e-12
N03	30080	104.107	NOK	2	SID 26681509	1.52416e-09
N04	25948	89.8049	NOK	2	Raloxifene	1.52416e-09
N05	30588	105.865	NOK	2	Kenpaullone	1.52416e-09
N06	29892	103.456	NOK	2	Abiraterone	1.52416e-09
N07	27376	94.7475	NOK	2	PCI-24781	1.52416e-09
N08	31472	108.925	NOK	2	Sunitinib	1.52416e-09
N09	27748	96.0351	NOK	2	SMER28	1.52416e-09
N10	30424	105.297	NOK	2	Afatinib	1.52416e-09
N11	28672	99.2333	NOK	2	PD98059	1.52416e-09
N12	31968	110.642	NOK	2	Nelarabine	1.52416e-09
N13	27464	95.0521	NOK	2	BRD-K26531177	1.52416e-09
N14	28504	98.6518	NOK	2	Vismodegib	1.52416e-09
N15	29496	102.085	NOK	2	PD 169316	1.52416e-09
N16	29044	100.521	NOK	2	Ibrutinib	1.52416e-09
N17	34776	120.361	NOK	2	BRD-K20757673	1.52416e-09
N18	1548	5.35024	NOK	2	Bortezomib	1.52416e-09
N19	28288	97.9042	NOK	2	Tie2 kinase inhibitor	1.52416e-09
N20	26604	92.0755	NOK	2	Axitinib	1.52416e-09
N21	30028	103.927	NOK	2	BRD-K40109029	1.52416e-09
N22	23444	81.1379	NOK	2	Trametinib	1.52416e-09
N23	27564	95.3983	NOK	2	DMSO Control	0.001
N24	4	0.0060572	NOK	2	Blank	0
O01	0	-0.00778782	NOK	2	Blank	0
O02	29356	101.601	NOK	2	Side Car Control	2.09075e-12
O03	29876	103.401	NOK	2	AG 1295	1.52416e-09
O04	25036	86.6482	NOK	2	IKK-2 Inhibitor XI	1.52416e-09
O05	30184	104.467	NOK	2	SL327	1.52416e-09
O06	27964	96.7828	NOK	2	UNC0321	1.52416e-09
O07	28788	99.6348	NOK	2	Oncrasin-1	1.52416e-09
O08	28892	99.9948	NOK	2	Na+/H+ Exchanger Isoform-1 Inhibitor	1.52416e-09
O09	28816	99.7318	NOK	2	YM155 (Sepantronium Bromide)	1.52416e-09
O10	28556	98.8318	NOK	2	AEG 3482	1.52416e-09
O11	31612	109.409	NOK	2	Cerulenin,_Cephalosporium_caerulens	1.52416e-09
O12	31080	107.568	NOK	2	CCR2 Antagonist	1.52416e-09
O13	27620	95.5921	NOK	2	BMS-708163 (Avagacestat)	1.52416e-09
O14	29028	100.466	NOK	2	SR8278	1.52416e-09
O15	27844	96.3674	NOK	2	Fasentin	1.52416e-09
O16	28556	98.8318	NOK	2	4-Hydroxyphenylretinamide	1.52416e-09
O17	29460	101.961	NOK	2	H 89 2HCl	1.52416e-09
O18	29116	100.77	NOK	2	BI-87G3	1.52416e-09
O19	27204	94.1522	NOK	2	JNK Inhibitor IX	1.52416e-09
O20	28192	97.5719	NOK	2	Akt Inhibitor IV	1.52416e-09
O21	29204	101.075	NOK	2	Forskolin	1.52416e-09
O22	25468	88.1435	NOK	2	Cdk/Crk Inhibitor	1.52416e-09
O23	27104	93.8061	NOK	2	DMSO Control	0.001
O24	0	-0.00778782	NOK	2	Blank	0
P01	4	0.0060572	NOK	2	Blank	0
P02	25436	88.0327	NOK	2	Side Car Control	6.96917e-13
P03	28480	98.5688	NOK	2	OSI-930	1.52416e-09
P04	20760	71.8479	NOK	2	Carfilzomib	1.52416e-09
P05	26232	90.7879	NOK	2	BRD-K88477136	1.52416e-09
P06	26680	92.3385	NOK	2	Ponatinib	1.52416e-09
P07	26832	92.8646	NOK	2	nifuroxazide	1.52416e-09
P08	30472	105.464	NOK	2	Vandetanib	1.52416e-09
P09	28356	98.1396	NOK	2	HA-1004	1.52416e-09
P10	28692	99.3026	NOK	2	Cabozantinib	1.52416e-09
P11	29156	100.909	NOK	2	BRD-A45107007	1.52416e-09
P12	29096	100.701	NOK	2	Plerixafor	1.52416e-09
P13	28036	97.032	NOK	2	BRD-K21894166	1.52416e-09
P14	29716	102.847	NOK	2	Vemurafenib	1.52416e-09
P15	29084	100.659	NOK	2	nifedipine	1.52416e-09
P16	27220	94.2076	NOK	2	PCI-32765	1.52416e-09
P17	31376	108.593	NOK	2	BRD-K69577666	1.52416e-09
P18	26572	91.9647	NOK	2	Regorafenib	1.52416e-09
P19	28968	100.258	NOK	2	NSC 74859	1.52416e-09
P20	28804	99.6902	NOK	2	Dabrafenib	1.52416e-09
P21	29640	102.584	NOK	2	roscovitine	1.52416e-09
P22	27764	96.0905	NOK	2	Pomalidomide	1.52416e-09
P23	27472	95.0798	NOK	2	DMSO Control	0.001
P24	0	-0.00778782	NOK	2	Blank	0
A01	0	-0.00857126	NOK	1	Blank	0
A02	1492	5.37599	NOK	1	Side Car Control	1e-05
A03	26052	94.0118	NOK	1	Acadesine	5.08053e-10
A04	23508	84.8307	NOK	1	10058-F4	5.08053e-10
A05	25608	92.4095	NOK	1	PD0325901	5.08053e-10
A06	30352	109.53	NOK	1	APO866 (FK866)	5.08053e-10
A07	27884	100.623	NOK	1	HA14-1	5.08053e-10
A08	27652	99.7862	NOK	1	NSC 23766	5.08053e-10
A09	28900	104.29	NOK	1	LAQ824 (NVP-LAQ824, Dacinostat)	5.08053e-10
A10	27308	98.5447	NOK	1	PF-543	5.08053e-10
A11	30368	109.588	NOK	1	MLN8237 (Alisertib)	5.08053e-10
A12	31844	114.915	NOK	1	Betulinic acid	5.08053e-10
A13	26412	95.3111	NOK	1	BIBR1532	5.08053e-10
A14	31404	113.327	NOK	1	SMI-4a	5.08053e-10
A15	27372	98.7757	NOK	1	PD173074	5.08053e-10
A16	28676	103.482	NOK	1	WP1066	5.08053e-10
A17	28644	103.366	NOK	1	Tosedostat (CHR2797)	5.08053e-10
A18	30484	110.007	NOK	1	GM6001	5.08053e-10
A19	26940	97.2166	NOK	1	SP600125	5.08053e-10
A20	28584	103.15	NOK	1	NH125	5.08053e-10
A21	28236	101.894	NOK	1	Daidzein	5.08053e-10
A22	23432	84.5564	NOK	1	AZD7545	5.08053e-10
A23	26284	94.8491	NOK	1	DMSO Control	0.001
A24	0	-0.00857126	NOK	1	Blank	0
B01	4	0.00586455	NOK	1	Blank	0
B02	15944	57.5326	NOK	1	Side Car Control	3.33333e-06
B03	27428	98.9778	NOK	1	Chk2 Inhibitor	5.08053e-10
B04	28252	101.952	NOK	1	Methotrexate	5.08053e-10
B05	28632	103.323	NOK	1	PIM1/2 Kinase Inhibitor VI	5.08053e-10
B06	29260	105.589	NOK	1	Busulfan	5.08053e-10
B07	28668	103.453	NOK	1	indisulam	5.08053e-10
B08	32028	115.579	NOK	1	Allopurinol	5.08053e-10
B09	28588	103.164	NOK	1	SKF-96365, Hydrochloride	5.08053e-10
B10	31628	114.135	NOK	1	Chlorambucil	5.08053e-10
B11	30488	110.021	NOK	1	STAT5 Inhibitor	5.08053e-10
B12	30184	108.924	NOK	1	Melphalan	5.08053e-10
B13	30640	110.57	NOK	1	PDGF RTK Inhibitor	5.08053e-10
B14	31248	112.764	NOK	1	Altretamine	5.08053e-10
B15	31832	114.872	NOK	1	NSC632839	5.08053e-10
B16	28744	103.727	NOK	1	Aminolevulinic Acid	5.08053e-10
B17	31240	112.735	NOK	1	IKK-3 Inhibitor IX	5.08053e-10
B18	28508	102.875	NOK	1	Fluorouracil	5.08053e-10
B19	29440	106.239	NOK	1	SB-202474	5.08053e-10
B20	29904	107.914	NOK	1	Pipobroman	5.08053e-10
B21	28164	101.634	NOK	1	PKR Inhibitor	5.08053e-10
B22	29832	107.654	NOK	1	Cyclophophamide	5.08053e-10
B23	25372	91.5578	NOK	1	DMSO Control	0.001
B24	4	0.00586455	NOK	1	Blank	0
C01	4	0.00586455	NOK	1	Blank	0
C02	20936	75.5484	NOK	1	Side Car Control	1.11111e-06
C03	26836	96.8413	NOK	1	ABT-737	5.08053e-10
C04	27192	98.1261	NOK	1	Quercetagetin	5.08053e-10
C05	29376	106.008	NOK	1	Perifosine (KRX-0401)	5.08053e-10
C06	24216	87.3858	NOK	1	ML-030	5.08053e-10
C07	28080	101.331	NOK	1	SB 202190	5.08053e-10
C08	28236	101.894	NOK	1	PI 3-Kgamma Inhibitor VII	5.08053e-10
C09	33000	119.087	NOK	1	U0126-EtOH	5.08053e-10
C10	30008	108.289	NOK	1	GSK-J1 (sodium salt)	5.08053e-10
C11	30844	111.306	NOK	1	Iniparib (BSI-201)	5.08053e-10
C12	31756	114.597	NOK	1	Tpl2 Kinase Inhibitor	5.08053e-10
C13	23848	86.0577	NOK	1	Melatonin	5.08053e-10
C14	29088	104.969	NOK	1	PF-750	5.08053e-10
C15	27164	98.025	NOK	1	ABT-888 (Veliparib)	5.08053e-10
C16	28640	103.352	NOK	1	Rho Kinase Inhibitor II	5.08053e-10
C17	28524	102.933	NOK	1	XL765	5.08053e-10
C18	32052	115.666	NOK	1	Bexarotene	5.08053e-10
C19	26252	94.7336	NOK	1	AZD6244 (Selumetinib)	5.08053e-10
C20	28348	102.298	NOK	1	Thyroid Hormone Receptor Antagonist, 1-850	5.08053e-10
C21	26792	96.6825	NOK	1	LDE225 (NVP-LDE225, Erismodegib)	5.08053e-10
C22	23236	83.849	NOK	1	GSK-LSD1 hydrochloride	5.08053e-10
C23	26932	97.1877	NOK	1	DMSO Control	0.001
C24	4	0.00586455	NOK	1	Blank	0
D01	0	-0.00857126	NOK	1	Blank	0
D02	22604	81.5682	NOK	1	Side Car Control	3.7037e-07
D03	27056	97.6352	NOK	1	ERK Inhibitor II, Negative control	5.08053e-10
D04	27544	99.3964	NOK	1	Mitomycin C	5.08053e-10
D05	26948	97.2455	NOK	1	AA-COCF3	5.08053e-10
D06	30760	111.003	NOK	1	Floxuridine	5.08053e-10
D07	27968	100.927	NOK	1	VEGF Receptor 2 Kinase Inhibitor I	5.08053e-10
D08	33008	119.116	NOK	1	Hydroxyurea	5.08053e-10
D09	29376	106.008	NOK	1	Pentostatin	5.08053e-10
D10	31296	112.937	NOK	1	Uracil mustard	5.08053e-10
D11	28932	104.406	NOK	1	GSK-3 Inhibitor XIII	5.08053e-10
D12	33032	119.202	NOK	1	Mitotane	5.08053e-10
D13	27180	98.0827	NOK	1	importazole	5.08053e-10
D14	29428	106.196	NOK	1	Dacarbazine	5.08053e-10
D15	28428	102.587	NOK	1	Secreted Frizzled Related Protein-1 Inhibitor	5.08053e-10
D16	28560	103.063	NOK	1	Methoxsalen	5.08053e-10
D17	33288	120.126	NOK	1	CD-1530	5.08053e-10
D18	23228	83.8202	NOK	1	Vinblastine	5.08053e-10
D19	28380	102.413	NOK	1	STAT3 Inhibitor IX, Cpd188	5.08053e-10
D20	28800	103.929	NOK	1	Thalidomide	5.08053e-10
D21	28684	103.511	NOK	1	Stem-Cell Factor/c-Kit Inhibitor, ISCK03	5.08053e-10
D22	18888	68.1573	NOK	1	Vincristine	5.08053e-10
D23	25320	91.3701	NOK	1	DMSO Control	0.001
D24	0	-0.00857126	NOK	1	Blank	0
E01	4	0.00586455	NOK	1	Blank	0
E02	27352	98.7035	NOK	1	Side Car Control	1.23457e-07
E03	32084	115.781	NOK	1	Linifanib (ABT-869)	5.08053e-10
E04	24552	88.5984	NOK	1	(+)-JQ1	5.08053e-10
E05	34436	124.269	NOK	1	PI-103	5.08053e-10
E06	27768	100.205	NOK	1	Ciclopirox ethanolamine	5.08053e-10
E07	33292	120.141	NOK	1	MK-2206 dihydrochloride	5.08053e-10
E08	29084	104.954	NOK	1	Rofecoxib (Vioxx)	5.08053e-10
E09	30640	110.57	NOK	1	TAE684 (NVP-TAE684)	5.08053e-10
E10	31480	113.601	NOK	1	Dorsomorphin 2HCl	5.08053e-10
E11	34812	125.626	NOK	1	PLX-4720	5.08053e-10
E12	31544	113.832	NOK	1	Lomeguatrib	5.08053e-10
E13	31356	113.154	NOK	1	PIK-75	5.08053e-10
E14	32312	116.604	NOK	1	JSH-23	5.08053e-10
E15	32780	118.293	NOK	1	GSK1059615	5.08053e-10
E16	32268	116.445	NOK	1	PD168393	5.08053e-10
E17	30764	111.017	NOK	1	MK-1775	5.08053e-10
E18	34552	124.688	NOK	1	ZM 336372	5.08053e-10
E19	31332	113.067	NOK	1	GSK429286A	5.08053e-10
E20	4464	16.1018	NOK	1	Romidepsin (FK228 ,depsipeptide)	5.08053e-10
E21	22392	80.8031	NOK	1	SB 743921	5.08053e-10
E22	27404	98.8911	NOK	1	Fedratinib (SAR302503, TG101348)	5.08053e-10
E23	30572	110.324	NOK	1	DMSO Control	0.001
E24	0	-0.00857126	NOK	1	Blank	0
F01	0	-0.00857126	NOK	1	Blank	0
F02	28580	103.135	NOK	1	Side Car Control	4.11523e-08
F03	30160	108.837	NOK	1	FGF/PDGF/VEGF RTK Inhibitor	5.08053e-10
F04	33504	120.906	NOK	1	Procarbazine	5.08053e-10
F05	29784	107.48	NOK	1	MST-312;Telomerase Inhibitor IX	5.08053e-10
F06	33396	120.516	NOK	1	Lomustine	5.08053e-10
F07	26912	97.1155	NOK	1	p38 MAP Kinase Inhibitor V	5.08053e-10
F08	36780	132.729	NOK	1	Daunorubicin	5.08053e-10
F09	29048	104.824	NOK	1	PRL-3 Inhibitor I	5.08053e-10
F10	32184	116.142	NOK	1	Azacitidine	5.08053e-10
F11	33288	120.126	NOK	1	UCN-02 (PKC inhibitor)	5.08053e-10
F12	36160	130.491	NOK	1	Cladribine	5.08053e-10
F13	28608	103.236	NOK	1	ABT-263 (Navitoclax)	5.08053e-10
F14	32256	116.402	NOK	1	Ifosfamide	5.08053e-10
F15	31012	111.912	NOK	1	Vinorelbine Tartrate	5.08053e-10
F16	26280	94.8347	NOK	1	Tretinoin	5.08053e-10
F17	37748	136.222	NOK	1	Valinomycin,_Streptomyces_fulvissimus	5.08053e-10
F18	29404	106.109	NOK	1	Adriamycin	5.08053e-10
F19	36192	130.607	NOK	1	HNF4a napthofuran agonist "Compound 5"	5.08053e-10
F20	22676	81.828	NOK	1	Paclitaxel	5.08053e-10
F21	31636	114.164	NOK	1	Go6976	5.08053e-10
F22	31992	115.449	NOK	1	Decitabine	5.08053e-10
F23	26216	94.6037	NOK	1	DMSO Control	0.001
F24	4	0.00586455	NOK	1	Blank	0
G01	4	0.00586455	NOK	1	Blank	0
G02	28280	102.053	NOK	1	Side Car Control	1.37174e-08
G03	34016	122.754	NOK	1	BMS-536924	5.08053e-10
G04	27332	98.6313	NOK	1	GMX-1778	5.08053e-10
G05	30220	109.054	NOK	1	Tandutinib (MLN518)	5.08053e-10
G06	34392	124.111	NOK	1	SCH 530348	5.08053e-10
G07	32448	117.095	NOK	1	PF-04217903	5.08053e-10
G08	31076	112.143	NOK	1	RO-3306	5.08053e-10
G09	30340	109.487	NOK	1	GSK690693	5.08053e-10
G10	32544	117.441	NOK	1	SD-208	5.08053e-10
G11	33036	119.217	NOK	1	IKK Inhibitor X	5.08053e-10
G12	22536	81.3228	NOK	1	Ixabepilone	5.08053e-10
G13	28412	102.529	NOK	1	YM201636	5.08053e-10
G14	30720	110.858	NOK	1	PF-4800567	5.08053e-10
G15	31228	112.692	NOK	1	MGCD0103 (Mocetinostat)?	5.08053e-10
G16	31328	113.053	NOK	1	CDDO-Me	5.08053e-10
G17	31716	114.453	NOK	1	Quizartinib (AC220)	5.08053e-10
G18	31268	112.836	NOK	1	GSK269962A	5.08053e-10
G19	33900	122.335	NOK	1	Marimastat	5.08053e-10
G20	30156	108.823	NOK	1	BXL 628	5.08053e-10
G21	31720	114.467	NOK	1	SGI-1776 free base	5.08053e-10
G22	25212	90.9803	NOK	1	N9-isopropylolomoucine	5.08053e-10
G23	28028	101.143	NOK	1	DMSO Control	0.001
G24	4	0.00586455	NOK	1	Blank	0
H01	4	0.00586455	NOK	1	Blank	0
H02	27748	100.133	NOK	1	Side Car Control	4.57247e-09
H03	31536	113.803	NOK	1	isonicotinohydroxamic acid	5.08053e-10
H04	29556	106.658	NOK	1	Etoposide	5.08053e-10
H05	23032	83.1128	NOK	1	ML204	5.08053e-10
H06	30960	111.725	NOK	1	Tamoxifen	5.08053e-10
H07	18684	67.4211	NOK	1	mw-ctdd-3	5.08053e-10
H08	27464	99.1077	NOK	1	Rapamycin	5.08053e-10
H09	29160	105.228	NOK	1	cytochalasin_B	5.08053e-10
H10	30924	111.595	NOK	1	Carboplatin	5.08053e-10
H11	31012	111.912	NOK	1	Glyburide (Diabeta)	5.08053e-10
H12	34488	124.457	NOK	1	Oxaliplatin	5.08053e-10
H13	31524	113.76	NOK	1	TPCA-1	5.08053e-10
H14	33388	120.487	NOK	1	Mitoxantrone	5.08053e-10
H15	37256	134.447	NOK	1	(5Z)-7-Oxozeaenol, Curvularia sp.	5.08053e-10
H16	31532	113.789	NOK	1	Cytarabine	5.08053e-10
H17	33752	121.801	NOK	1	Nigericin	5.08053e-10
H18	30456	109.906	NOK	1	Amifostine	5.08053e-10
H19	34684	125.164	NOK	1	Wnt Antagonist I, IWR-1-endo	5.08053e-10
H20	32788	118.322	NOK	1	Temozolomide	5.08053e-10
H21	28772	103.828	NOK	1	Clioquinol	5.08053e-10
H22	29416	106.152	NOK	1	Imiquimod	5.08053e-10
H23	30316	109.4	NOK	1	DMSO Control	0.001
H24	0	-0.00857126	NOK	1	Blank	0
I01	0	-0.00857126	NOK	1	Blank	0
I02	28344	102.284	NOK	1	Side Car Control	1.52416e-09
I03	32448	117.095	NOK	1	Saracatinib (AZD0530)	5.08053e-10
I04	27832	100.436	NOK	1	ML083	5.08053e-10
I05	30656	110.627	NOK	1	Trichostatin A (TSA)	5.08053e-10
I06	31476	113.587	NOK	1	Lithium_Chloride,_MB_Grade	5.08053e-10
I07	27252	98.3426	NOK	1	Refametinib (RDEA119, Bay 86-9766)	5.08053e-10
I08	31460	113.529	NOK	1	AG-690/36107028	5.08053e-10
I09	30624	110.512	NOK	1	Triciribine (Triciribine phosphate)	5.08053e-10
I10	30916	111.566	NOK	1	A66	5.08053e-10
I11	34828	125.684	NOK	1	AT13387	5.08053e-10
I12	30828	111.248	NOK	1	BRD9647	5.08053e-10
I13	31232	112.706	NOK	1	Cimetidine (Tagamet)	5.08053e-10
I14	30792	111.118	NOK	1	StemRegenin 1	5.08053e-10
I15	33944	122.494	NOK	1	Sildenafil citrate	5.08053e-10
I16	29508	106.484	NOK	1	ARQ 197 (Tivantinib)	5.08053e-10
I17	33492	120.862	NOK	1	AZD7762	5.08053e-10
I18	27000	97.4331	NOK	1	IOX1	5.08053e-10
I19	31096	112.215	NOK	1	BX-795	5.08053e-10
I20	31824	114.843	NOK	1	SB 225002;SB-225002	5.08053e-10
I21	29584	106.759	NOK	1	BI6727 (Volasertib)	5.08053e-10
I22	25180	90.8648	NOK	1	BIX01294	5.08053e-10
I23	29988	108.217	NOK	1	DMSO Control	0.001
I24	0	-0.00857126	NOK	1	Blank	0
J01	0	-0.00857126	NOK	1	Blank	0
J02	29296	105.719	NOK	1	Side Car Control	5.08053e-10
J03	29332	105.849	NOK	1	ELCPK	5.08053e-10
J04	24168	87.2126	NOK	1	Carmustine	5.08053e-10
J05	33188	119.765	NOK	1	PDGFR Tyrosine Kinase Inhibitor VII	5.08053e-10
J06	30920	111.58	NOK	1	Clofarabine	5.08053e-10
J07	27968	100.927	NOK	1	Indomethacin (Indocid, Indocin)	5.08053e-10
J08	30252	109.169	NOK	1	Topotecan	5.08053e-10
J09	29176	105.286	NOK	1	NF449	5.08053e-10
J10	22116	79.807	NOK	1	Gemcitabine	5.08053e-10
J11	32172	116.099	NOK	1	UNC0642	5.08053e-10
J12	32556	117.484	NOK	1	Irinotecan	5.08053e-10
J13	31256	112.793	NOK	1	Myoseverin	5.08053e-10
J14	24372	87.9488	NOK	1	Docetaxel	5.08053e-10
J15	30796	111.133	NOK	1	NSC401077	5.08053e-10
J16	32900	118.726	NOK	1	Vorinostat	5.08053e-10
J17	30632	110.541	NOK	1	NF-kB Activation Inhibitor IV	5.08053e-10
J18	28932	104.406	NOK	1	Exemestane	5.08053e-10
J19	31368	113.197	NOK	1	TGX-221	5.08053e-10
J20	31728	114.496	NOK	1	Gefitinib	5.08053e-10
J21	26940	97.2166	NOK	1	Semagacestat (LY450139)	5.08053e-10
J22	27084	97.7363	NOK	1	Erlotinib	5.08053e-10
J23	27968	100.927	NOK	1	DMSO Control	0.001
J24	4	0.00586455	NOK	1	Blank	0
K01	0	-0.00857126	NOK	1	Blank	0
K02	29712	107.221	NOK	1	Side Car Control	1.69351e-10
K03	32756	118.206	NOK	1	SB 203580	5.08053e-10
K04	28624	103.294	NOK	1	GSK-3 inhibitor IX	5.08053e-10
K05	32036	115.608	NOK	1	Olaparib (AZD2281)	5.08053e-10
K06	27988	100.999	NOK	1	(-)-Deguelin	5.08053e-10
K07	29916	107.957	NOK	1	Alsterpaullone	5.08053e-10
K08	30096	108.606	NOK	1	PARP Inhibitor XI, DR2313	5.08053e-10
K09	33604	121.267	NOK	1	TW-37	5.08053e-10
K10	31384	113.255	NOK	1	CI976	5.08053e-10
K11	31888	115.074	NOK	1	PI 3-Kalpha Inhibitor IV	5.08053e-10
K12	34152	123.244	NOK	1	AY 9944	5.08053e-10
K13	31084	112.172	NOK	1	Fludarabine Phosphate (Fludara)	5.08053e-10
K14	35692	128.802	NOK	1	1NM-PP1	5.08053e-10
K15	26048	93.9974	NOK	1	Parbendazole	5.08053e-10
K16	33100	119.448	NOK	1	p38 MAP Kinase Inhibitor VI, JX401	5.08053e-10
K17	32036	115.608	NOK	1	EX 527	5.08053e-10
K18	32512	117.326	NOK	1	SB 218078;SB-218078	5.08053e-10
K19	32172	116.099	NOK	1	Isogranulatimide (Chk Inhibitor V)	5.08053e-10
K20	30956	111.71	NOK	1	(?)-Bay K 8644	5.08053e-10
K21	32528	117.383	NOK	1	BKM120 (NVP-BKM120)	5.08053e-10
K22	26548	95.8019	NOK	1	Midostaurin hydrate	5.08053e-10
K23	28320	102.197	NOK	1	DMSO Control	0.001
K24	4	0.00586455	NOK	1	Blank	0
L01	0	-0.00857126	NOK	1	Blank	0
L02	27692	99.9305	NOK	1	Side Car Control	5.64503e-11
L03	28600	103.207	NOK	1	Etomoxir sodium salt	5.08053e-10
L04	29860	107.755	NOK	1	Fulvestrant	5.08053e-10
L05	31908	115.146	NOK	1	Necrostatin-7	5.08053e-10
L06	30704	110.801	NOK	1	Anastrozole	5.08053e-10
L07	29552	106.643	NOK	1	GANT58;Hh/Gli Antagonist, GANT58	5.08053e-10
L08	33656	121.454	NOK	1	Celecoxib	5.08053e-10
L09	30432	109.819	NOK	1	Adenosine Kinase Inhibitor	5.08053e-10
L10	30400	109.704	NOK	1	Dasatinib	5.08053e-10
L11	33240	119.953	NOK	1	17-AAG (Tanespimycin)	5.08053e-10
L12	32020	115.55	NOK	1	Pazopanib	5.08053e-10
L13	33388	120.487	NOK	1	HIF-1 Inhibitor	5.08053e-10
L14	31956	115.319	NOK	1	Imatinib	5.08053e-10
L15	30384	109.646	NOK	1	Protein Methyltransferase Inhibitor, AMI-5	5.08053e-10
L16	29688	107.134	NOK	1	Lapatinib	5.08053e-10
L17	30088	108.578	NOK	1	All-trans Retinoic Acid (Tretinoin)	5.08053e-10
L18	31696	114.381	NOK	1	Nilotinib	5.08053e-10
L19	31672	114.294	NOK	1	PP-121	5.08053e-10
L20	32048	115.651	NOK	1	Sorafenib	5.08053e-10
L21	28280	102.053	NOK	1	FGF Receptor Tyrosine Kinase Inhibitor	5.08053e-10
L22	29148	105.185	NOK	1	Lenalidomide	5.08053e-10
L23	29788	107.495	NOK	1	DMSO Control	0.001
L24	0	-0.00857126	NOK	1	Blank	0
M01	4	0.00586455	NOK	1	Blank	0
M02	27508	99.2665	NOK	1	Side Car Control	1.88168e-11
M03	28024	101.129	NOK	1	BEZ235 (NVP-BEZ235)	5.08053e-10
M04	27308	98.5447	NOK	1	BRD4132	5.08053e-10
M05	29496	106.441	NOK	1	Nutlin-3	5.08053e-10
M06	30376	109.617	NOK	1	CCT128930	5.08053e-10
M07	28512	102.89	NOK	1	OSI-906 (Linsitinib)	5.08053e-10
M08	32728	118.105	NOK	1	Ivachtin	5.08053e-10
M09	27780	100.248	NOK	1	SRT1720	5.08053e-10
M10	30588	110.382	NOK	1	MNS (3,4-Methylenedioxy-??-nitrostyrene)	5.08053e-10
M11	29188	105.33	NOK	1	JNJ 26854165 (Serdemetan)	5.08053e-10
M12	28916	104.348	NOK	1	Wortmannin	5.08053e-10
M13	27708	99.9883	NOK	1	2-Methoxyestradiol	5.08053e-10
M14	32068	115.723	NOK	1	Tacrolimus (FK506)	5.08053e-10
M15	28568	103.092	NOK	1	TSU-68	5.08053e-10
M16	28532	102.962	NOK	1	NVP-231	5.08053e-10
M17	30500	110.064	NOK	1	Fasudil HCl (HA-1077)	5.08053e-10
M18	25772	93.0013	NOK	1	FR 180204	5.08053e-10
M19	29072	104.911	NOK	1	Ki8751	5.08053e-10
M20	27648	99.7717	NOK	1	GSK-3b Inhibitor XI	5.08053e-10
M21	28788	103.886	NOK	1	cx-4945 (Silmitasertib)	5.08053e-10
M22	20504	73.9894	NOK	1	Triptolide	5.08053e-10
M23	27004	97.4476	NOK	1	DMSO Control	0.001
M24	4	0.00586455	NOK	1	Blank	0
N01	4	0.00586455	NOK	1	Blank	0
N02	25656	92.5827	NOK	1	Side Car Control	6.27225e-12
N03	28728	103.669	NOK	1	SID 26681509	5.08053e-10
N04	24204	87.3425	NOK	1	Raloxifene	5.08053e-10
N05	32956	118.928	NOK	1	Kenpaullone	5.08053e-10
N06	29200	105.373	NOK	1	Abiraterone	5.08053e-10
N07	26264	94.7769	NOK	1	PCI-24781	5.08053e-10
N08	30416	109.761	NOK	1	Sunitinib	5.08053e-10
N09	25308	91.3268	NOK	1	SMER28	5.08053e-10
N10	27944	100.84	NOK	1	Afatinib	5.08053e-10
N11	29264	105.604	NOK	1	PD98059	5.08053e-10
N12	31644	114.193	NOK	1	Nelarabine	5.08053e-10
N13	26720	96.4226	NOK	1	BRD-K26531177	5.08053e-10
N14	30700	110.786	NOK	1	Vismodegib	5.08053e-10
N15	28296	102.11	NOK	1	PD 169316	5.08053e-10
N16	25944	93.6221	NOK	1	Ibrutinib	5.08053e-10
N17	30772	111.046	NOK	1	BRD-K20757673	5.08053e-10
N18	2036	7.33926	NOK	1	Bortezomib	5.08053e-10
N19	27404	98.8911	NOK	1	Tie2 kinase inhibitor	5.08053e-10
N20	28028	101.143	NOK	1	Axitinib	5.08053e-10
N21	28932	104.406	NOK	1	BRD-K40109029	5.08053e-10
N22	22324	80.5577	NOK	1	Trametinib	5.08053e-10
N23	24908	89.8832	NOK	1	DMSO Control	0.001
N24	4	0.00586455	NOK	1	Blank	0
O01	4	0.00586455	NOK	1	Blank	0
O02	27948	100.854	NOK	1	Side Car Control	2.09075e-12
O03	28644	103.366	NOK	1	AG 1295	5.08053e-10
O04	24916	89.9121	NOK	1	IKK-2 Inhibitor XI	5.08053e-10
O05	30660	110.642	NOK	1	SL327	5.08053e-10
O06	26740	96.4948	NOK	1	UNC0321	5.08053e-10
O07	26664	96.2205	NOK	1	Oncrasin-1	5.08053e-10
O08	27772	100.219	NOK	1	Na+/H+ Exchanger Isoform-1 Inhibitor	5.08053e-10
O09	29000	104.651	NOK	1	YM155 (Sepantronium Bromide)	5.08053e-10
O10	27620	99.6707	NOK	1	AEG 3482	5.08053e-10
O11	29328	105.835	NOK	1	Cerulenin,_Cephalosporium_caerulens	5.08053e-10
O12	33180	119.736	NOK	1	CCR2 Antagonist	5.08053e-10
O13	25616	92.4383	NOK	1	BMS-708163 (Avagacestat)	5.08053e-10
O14	30088	108.578	NOK	1	SR8278	5.08053e-10
O15	27936	100.811	NOK	1	Fasentin	5.08053e-10
O16	29028	104.752	NOK	1	4-Hydroxyphenylretinamide	5.08053e-10
O17	30300	109.343	NOK	1	H 89 2HCl	5.08053e-10
O18	29616	106.874	NOK	1	BI-87G3	5.08053e-10
O19	28404	102.5	NOK	1	JNK Inhibitor IX	5.08053e-10
O20	27236	98.2848	NOK	1	Akt Inhibitor IV	5.08053e-10
O21	27348	98.689	NOK	1	Forskolin	5.08053e-10
O22	24308	87.7178	NOK	1	Cdk/Crk Inhibitor	5.08053e-10
O23	26664	96.2205	NOK	1	DMSO Control	0.001
O24	4	0.00586455	NOK	1	Blank	0
P01	4	0.00586455	NOK	1	Blank	0
P02	24788	89.4501	NOK	1	Side Car Control	6.96917e-13
P03	28112	101.446	NOK	1	OSI-930	5.08053e-10
P04	22808	82.3044	NOK	1	Carfilzomib	5.08053e-10
P05	29256	105.575	NOK	1	BRD-K88477136	5.08053e-10
P06	25504	92.0341	NOK	1	Ponatinib	5.08053e-10
P07	25036	90.3452	NOK	1	nifuroxazide	5.08053e-10
P08	31048	112.042	NOK	1	Vandetanib	5.08053e-10
P09	26440	95.4121	NOK	1	HA-1004	5.08053e-10
P10	28408	102.515	NOK	1	Cabozantinib	5.08053e-10
P11	24236	87.458	NOK	1	BRD-A45107007	5.08053e-10
P12	27204	98.1694	NOK	1	Plerixafor	5.08053e-10
P13	26676	96.2638	NOK	1	BRD-K21894166	5.08053e-10
P14	26528	95.7297	NOK	1	Vemurafenib	5.08053e-10
P15	26596	95.9751	NOK	1	nifedipine	5.08053e-10
P16	26984	97.3754	NOK	1	PCI-32765	5.08053e-10
P17	29732	107.293	NOK	1	BRD-K69577666	5.08053e-10
P18	25656	92.5827	NOK	1	Regorafenib	5.08053e-10
P19	29532	106.571	NOK	1	NSC 74859	5.08053e-10
P20	27880	100.609	NOK	1	Dabrafenib	5.08053e-10
P21	28392	102.457	NOK	1	roscovitine	5.08053e-10
P22	26856	96.9134	NOK	1	Pomalidomide	5.08053e-10
P23	29700	107.177	NOK	1	DMSO Control	0.001
P24	4	0.00586455	NOK	1	Blank	0
A01	4	0.00458787	NOK	2	Blank	0
A02	2176	7.97647	NOK	2	Side Car Control	1e-05
A03	24156	88.6496	NOK	2	Acadesine	5.08053e-10
A04	23052	84.5976	NOK	2	10058-F4	5.08053e-10
A05	25980	95.3442	NOK	2	PD0325901	5.08053e-10
A06	26672	97.8841	NOK	2	APO866 (FK866)	5.08053e-10
A07	26896	98.7062	NOK	2	HA14-1	5.08053e-10
A08	25228	92.5842	NOK	2	NSC 23766	5.08053e-10
A09	26508	97.2821	NOK	2	LAQ824 (NVP-LAQ824, Dacinostat)	5.08053e-10
A10	25392	93.1861	NOK	2	PF-543	5.08053e-10
A11	27792	101.995	NOK	2	MLN8237 (Alisertib)	5.08053e-10
A12	27988	102.714	NOK	2	Betulinic acid	5.08053e-10
A13	26416	96.9445	NOK	2	BIBR1532	5.08053e-10
A14	28448	104.403	NOK	2	SMI-4a	5.08053e-10
A15	25152	92.3052	NOK	2	PD173074	5.08053e-10
A16	28236	103.624	NOK	2	WP1066	5.08053e-10
A17	27568	101.173	NOK	2	Tosedostat (CHR2797)	5.08053e-10
A18	28104	103.14	NOK	2	GM6001	5.08053e-10
A19	26556	97.4583	NOK	2	SP600125	5.08053e-10
A20	25504	93.5972	NOK	2	NH125	5.08053e-10
A21	25120	92.1878	NOK	2	Daidzein	5.08053e-10
A22	23144	84.9353	NOK	2	AZD7545	5.08053e-10
A23	24440	89.692	NOK	2	DMSO Control	0.001
A24	0	-0.0100933	NOK	2	Blank	0
B01	4	0.00458787	NOK	2	Blank	0
B02	14376	52.7541	NOK	2	Side Car Control	3.33333e-06
B03	25820	94.757	NOK	2	Chk2 Inhibitor	5.08053e-10
B04	26228	96.2545	NOK	2	Methotrexate	5.08053e-10
B05	26848	98.53	NOK	2	PIM1/2 Kinase Inhibitor VI	5.08053e-10
B06	28844	105.856	NOK	2	Busulfan	5.08053e-10
B07	26196	96.137	NOK	2	indisulam	5.08053e-10
B08	30360	111.42	NOK	2	Allopurinol	5.08053e-10
B09	26240	96.2985	NOK	2	SKF-96365, Hydrochloride	5.08053e-10
B10	30544	112.095	NOK	2	Chlorambucil	5.08053e-10
B11	28172	103.39	NOK	2	STAT5 Inhibitor	5.08053e-10
B12	30068	110.348	NOK	2	Melphalan	5.08053e-10
B13	30704	112.683	NOK	2	PDGF RTK Inhibitor	5.08053e-10
B14	25856	94.8891	NOK	2	Altretamine	5.08053e-10
B15	31028	113.872	NOK	2	NSC632839	5.08053e-10
B16	25756	94.5221	NOK	2	Aminolevulinic Acid	5.08053e-10
B17	29496	108.249	NOK	2	IKK-3 Inhibitor IX	5.08053e-10
B18	26384	96.827	NOK	2	Fluorouracil	5.08053e-10
B19	27788	101.98	NOK	2	SB-202474	5.08053e-10
B20	29568	108.513	NOK	2	Pipobroman	5.08053e-10
B21	27668	101.54	NOK	2	PKR Inhibitor	5.08053e-10
B22	28348	104.035	NOK	2	Cyclophophamide	5.08053e-10
B23	26180	96.0783	NOK	2	DMSO Control	0.001
B24	4	0.00458787	NOK	2	Blank	0
C01	4	0.00458787	NOK	2	Blank	0
C02	21556	79.1068	NOK	2	Side Car Control	1.11111e-06
C03	24808	91.0426	NOK	2	ABT-737	5.08053e-10
C04	24608	90.3086	NOK	2	Quercetagetin	5.08053e-10
C05	26224	96.2398	NOK	2	Perifosine (KRX-0401)	5.08053e-10
C06	26180	96.0783	NOK	2	ML-030	5.08053e-10
C07	26564	97.4877	NOK	2	SB 202190	5.08053e-10
C08	25756	94.5221	NOK	2	PI 3-Kgamma Inhibitor VII	5.08053e-10
C09	28572	104.858	NOK	2	U0126-EtOH	5.08053e-10
C10	31804	116.72	NOK	2	GSK-J1 (sodium salt)	5.08053e-10
C11	29276	107.442	NOK	2	Iniparib (BSI-201)	5.08053e-10
C12	29576	108.543	NOK	2	Tpl2 Kinase Inhibitor	5.08053e-10
C13	25152	92.3052	NOK	2	Melatonin	5.08053e-10
C14	28700	105.327	NOK	2	PF-750	5.08053e-10
C15	25376	93.1274	NOK	2	ABT-888 (Veliparib)	5.08053e-10
C16	26532	97.3702	NOK	2	Rho Kinase Inhibitor II	5.08053e-10
C17	26404	96.9004	NOK	2	XL765	5.08053e-10
C18	29228	107.265	NOK	2	Bexarotene	5.08053e-10
C19	24580	90.2058	NOK	2	AZD6244 (Selumetinib)	5.08053e-10
C20	29204	107.177	NOK	2	Thyroid Hormone Receptor Antagonist, 1-850	5.08053e-10
C21	27252	100.013	NOK	2	LDE225 (NVP-LDE225, Erismodegib)	5.08053e-10
C22	21016	77.1249	NOK	2	GSK-LSD1 hydrochloride	5.08053e-10
C23	27132	99.5724	NOK	2	DMSO Control	0.001
C24	4	0.00458787	NOK	2	Blank	0
D01	0	-0.0100933	NOK	2	Blank	0
D02	25984	95.3589	NOK	2	Side Car Control	3.7037e-07
D03	30920	113.475	NOK	2	ERK Inhibitor II, Negative control	5.08053e-10
D04	25184	92.4227	NOK	2	Mitomycin C	5.08053e-10
D05	25956	95.2561	NOK	2	AA-COCF3	5.08053e-10
D06	29104	106.81	NOK	2	Floxuridine	5.08053e-10
D07	29704	109.012	NOK	2	VEGF Receptor 2 Kinase Inhibitor I	5.08053e-10
[truncated: 13,361 more rows]

## Sheet: screen 2
Cell	Drug (uM)	100	25	6.25	1.5625	0.390625	0.0976562	0.0244141	0.00610352	0.00152588	0
FHCRC-SCC-1	VX-680 (Tozasertib, MK-0457)	1.00731	28.4996	62.6214	67.6305	69.1545	69.31	95.5175	100.233	98.5749	101.986
FHCRC-SCC-1	VX-680 (Tozasertib, MK-0457)	1.02096	26.8483	63.8638	68.3967	68.2016	68.2734	90.4103	97.5699	101.135	99.7999
FHCRC-SCC-1	VX-680 (Tozasertib, MK-0457)	1.11284	35.5169	60.6365	65.4196	65.5778	72.1817	90.1362	94.5326	97.323	99.9425
NOK	VX-680 (Tozasertib, MK-0457)	0.520714	33.1327	61.9951	70.9922	72.1421	74.7658	71.884	94.5597	96.3374	107.218
NOK	VX-680 (Tozasertib, MK-0457)	0.52915	31.9432	49.9317	70.3037	73.9866	73.7646	66.4482	83.4043	97.3651	101.45
NOK	VX-680 (Tozasertib, MK-0457)	0.483678	34.1027	51.7933	71.008	71.3592	74.2766	66.1845	85.0439	93.9312	98.6042
FHCRC-SCC-1	Olaparib (AZD2281, Ku-0059436)	47.6539	75.2226	94.0934	98.2859	100.08	100.519	104.599	98.4754	99.9324	97.7583
FHCRC-SCC-1	Olaparib (AZD2281, Ku-0059436)	48.9545	73.9032	96.1082	96.4846	97.5079	97.249	99.0379	98.2993	102.517	99.5607
FHCRC-SCC-1	Olaparib (AZD2281, Ku-0059436)	56.8197	77.5571	90.6613	89.3574	89.3641	90.6207	95.6292	91.8505	97.2523	97.4293
NOK	Olaparib (AZD2281, Ku-0059436)	43.0504	77.5942	89.2279	81.5088	96.4747	99.5295	103.93	98.4752	101.732	99.1282
NOK	Olaparib (AZD2281, Ku-0059436)	45.8517	72.7998	88.0066	83.1598	100.54	101.749	106.15	92.0407	103.365	106.851
NOK	Olaparib (AZD2281, Ku-0059436)	43.1901	71.5289	84.0167	81.5193	96.1131	102.814	98.8109	98.6695	103.311	102.048
FHCRC-SCC-1	Talazoparib (BMN 673)	39.5286	35.0225	37.8286	67.3205	91.6026	96.3422	98.4274	98.056	96.3468	101.03
FHCRC-SCC-1	Talazoparib (BMN 673)	38.8751	35.0131	36.1321	66.4721	88.5761	97.1911	92.8662	95.7353	97.8032	98.0841
FHCRC-SCC-1	Talazoparib (BMN 673)	40.8031	35.7477	39.643	71.5005	86.8167	88.4942	90.0898	91.5542	93.8021	100.931
NOK	Talazoparib (BMN 673)	39.3405	62.3325	60.6452	66.3926	74.0199	78.5197	81.0871	88.3579	90.6558	100.332
NOK	Talazoparib (BMN 673)	38.5732	61.3687	63.4931	69.4131	78.4862	87.7996	83.6739	87.042	87.1429	98.5495
NOK	Talazoparib (BMN 673)	39.5752	59.7028	61.8947	67.0995	78.4577	85.9363	84.2674	91.844	94.4192	102.142
FHCRC-SCC-1	Roscovitine (Seliciclib,CYC202)	1.97428	56.5882	99.1601	97.7543	105.008	103.611	101.463	101.312	99.2559	99.4887
FHCRC-SCC-1	Roscovitine (Seliciclib,CYC202)	1.80937	57.4267	99.273	97.0403	105.083	107.572	102.48	101.152	101.805	101.193
FHCRC-SCC-1	Roscovitine (Seliciclib,CYC202)	2.19117	64.6829	91.7568	89.6982	95.7443	95.5126	93.1871	93.9432	96.3236	97.61
NOK	Roscovitine (Seliciclib,CYC202)	4.08214	46.5933	87.5136	88.4161	95.7823	97.468	93.3449	86.863	96.3727	99.668
NOK	Roscovitine (Seliciclib,CYC202)	4.63508	45.8999	95.5649	88.9827	101.329	103.711	101.249	93.452	98.1375	97.9395
NOK	Roscovitine (Seliciclib,CYC202)	4.55814	47.157	94.5945	93.1905	104.008	100.934	100.838	95.0779	93.6834	101.396
FHCRC-SCC-1	UMI-77	0.356886	7.97987	93.0318	94.9121	100.588	99.9234	100.335	100.257	102.779	99.8967
FHCRC-SCC-1	UMI-77	0.315186	6.79673	91.6569	93.1064	99.5456	98.5626	101.377	99.7791	101.147	98.1803
FHCRC-SCC-1	UMI-77	0.3	2.04869	88.4563	94.8626	100.233	99.2038	100.376	95.6231	99.4071	98.8282
NOK	UMI-77	0.291234	0.886577	61.7558	96.0725	105.04	103.347	101.815	100.587	103.3	104.888
NOK	UMI-77	0.307105	0.729291	56.5263	94.3616	104.918	101.605	102.744	98.6766	103.283	107.15
NOK	UMI-77	0.28377	0.898393	56.9387	92.9539	110.29	100.955	109.431	100.162	103.84	100.083
FHCRC-SCC-1	Epothilone B (EPO906, Patupilone)	24.4666	19.1963	22.945	21.9145	17.3952	14.3733	14.0144	15.0704	12.9925	100.567
FHCRC-SCC-1	Epothilone B (EPO906, Patupilone)	24.5953	18.4964	20.9929	20.325	16.7793	15.3119	15.0365	14.4588	13.48	100.553
FHCRC-SCC-1	Epothilone B (EPO906, Patupilone)	23.6787	19.6832	20.4318	21.7405	15.9082	14.063	13.0293	13.9203	12.0939	102.08
NOK	Epothilone B (EPO906, Patupilone)	35.1393	42.4745	40.7646	46.0492	48.4298	41.2037	37.1755	34.4486	36.8795	100.611
NOK	Epothilone B (EPO906, Patupilone)	36.274	41.9991	42.5733	43.7733	47.2978	42.0883	35.3853	34.7446	34.9284	100.026
NOK	Epothilone B (EPO906, Patupilone)	36.9633	43.6789	43.0302	45.1648	41.5475	40.2243	34.7008	34.453	38.3074	98.9858
FHCRC-SCC-1	PF-5006739	34.0733	61.8468	90.2903	93.4632	96.1316	96.7655	95.5055	99.9908	100.83	100.103
FHCRC-SCC-1	PF-5006739	32.3366	63.8629	86.9799	87.6455	97.9954	94.6809	95.3451	95.715	99.7018	100.571
FHCRC-SCC-1	PF-5006739	32.7295	63.1307	86.5055	90.544	98.5732	97.3681	95.2742	93.7165	92.7831	100.058
NOK	PF-5006739	28.8082	68.8139	83.3571	92.3386	104.187	98.6203	96.9398	93.6422	95.8887	103.022
NOK	PF-5006739	29.7589	69.9807	85.3016	87.3057	100.935	97.7195	100.594	91.7578	93.5651	100.821
NOK	PF-5006739	29.6865	69.189	82.1071	88.5064	100.423	99.6434	96.7881	91.3059	99.0077	99.917
FHCRC-SCC-1	PD 0332991 isethionate (Palbociclib)	0.428545	2.1731	67.7294	80.2153	84.0887	87.1556	85.4374	94.1168	98.5882	99.8147
FHCRC-SCC-1	PD 0332991 isethionate (Palbociclib)	0.458528	2.13552	65.7351	77.6002	85.4017	88.5584	82.7072	93.2001	95.2756	99.4465
FHCRC-SCC-1	PD 0332991 isethionate (Palbociclib)	0.424631	2.02205	65.2767	78.8904	85.4171	85.5373	84.4478	92.1211	94.7803	99.9424
NOK	PD 0332991 isethionate (Palbociclib)	0.383583	0.808819	53.4265	75.7553	73.3622	86.4813	83.8238	87.245	88.9022	97.7427
NOK	PD 0332991 isethionate (Palbociclib)	0.439308	0.827664	56.6042	75.246	79.6881	86.2489	86.339	91.6934	94.9365	99.974
NOK	PD 0332991 isethionate (Palbociclib)	0.423797	0.845101	56.9661	70.5913	77.4972	80.3723	65.5935	85.5768	91.0872	102.143
FHCRC-SCC-1	UNC 3230	84.3603	97.8482	98.2831	100.776	105.666	105.514	99.8807	103.75	102.121	99.0748
FHCRC-SCC-1	UNC 3230	86.8884	96.4703	98.1414	100.004	105.139	104.239	95.1027	101.568	101.477	103.017
NOK	UNC 3230	48.1082	34.1511	53.6044	100.593	98.3179	97.185	89.3747	99.8613	101.298	100.511
NOK	UNC 3230	62.1895	36.9297	60.8847	94.8839	98.225	94.3984	98.8084	107.242	104.563	104.305
NOK	UNC 3230	57.0481	29.1805	55.6811	102.992	96.7162	98.3062	90.7777	102.436	100.103	100.404
FHCRC-SCC-1	Cyclic Pifithrin-α hydrobromide	43.0275	68.5669	89.8186	95.1867	98.7494	99.4597	98.0433	98.3087	99.557	100.925
FHCRC-SCC-1	Cyclic Pifithrin-α hydrobromide	42.5381	67.6615	90.5897	97.5749	103.558	103.716	98.9593	99.7233	100.464	99.7882
NOK	Cyclic Pifithrin-α hydrobromide	29.792	57.3915	76.3638	87.2276	101.777	99.4429	89.0577	88.0625	90.8022	95.0226
NOK	Cyclic Pifithrin-α hydrobromide	32.1529	58.2205	84.1302	85.3411	96.1028	89.5354	91.0577	96.1644	95.7786	100.68
NOK	Cyclic Pifithrin-α hydrobromide	31.0891	62.3614	85.9143	93.0817	94.2979	100.005	95.2543	99.7982	100.818	99.5958
FHCRC-SCC-1	RITA	7.79107	74.982	89.5757	92.2232	101.555	99.2663	97.9323	98.5781	98.1987	101.948
FHCRC-SCC-1	RITA	6.97069	76.5373	89.8112	96.7613	101.893	103.115	101.737	100.024	101.23	100.212
NOK	RITA	3.52792	42.9651	81.8748	81.4818	96.1682	94.5339	95.9218	87.0572	91.6724	99.4889
NOK	RITA	4.49568	39.7017	78.6742	84.1354	92.6312	93.0092	89.0046	87.9077	90.6673	101.092
NOK	RITA	5.09363	39.6378	84.9268	86.1851	96.7294	95.9943	98.3965	96.6618	93.3721	103.234
FHCRC-SCC-1	Nutlin-3	0.49253	56.8741	97.3209	93.4324	95.0381	91.231	93.407	99.7726	99.7681	101.443
FHCRC-SCC-1	Nutlin-3	0.460116	55.3238	98.5312	97.7552	99.3559	97.7121	98.3194	100.163	99.4027	101.146
NOK	Nutlin-3	0.329255	6.50617	51.1162	69.708	85.1825	93.829	89.7881	96.0469	98.2486	100.701
NOK	Nutlin-3	0.285739	5.82816	53.1895	62.2576	86.0884	83.2302	77.2784	96.4424	94.4022	98.2384
NOK	Nutlin-3	0.321076	6.71067	57.8083	71.9799	90.0649	98.1053	97.6452	100.206	98.553	95.0894
Cell	Drug (uM)	100	25	6.25	1.5625	0.390625	0.0976562	0.0244141	0.00610352	0.00152588	0
FHCRC-SCC-1	MLN8237	4.96895	35.7914	54.3913	60.8432	55.3398	53.334	54.8015	56.056	55.2674	99.0324
FHCRC-SCC-1	MLN8237	5.39004	33.7113	54.0036	59.3676	54.3556	56.3147	52.1512	52.769	55.7334	100.51
FHCRC-SCC-1	MLN8237	6.11357	34.2378	54.62	58.2106	54.292	54.0944	51.4747	50.8036	52.3155	101.558
NOK	MLN8237	3.46544	40.1679	48.4166	65.0791	64.8089	62.42	57.7876	68.3843	74.1984	100.106
NOK	MLN8237	3.59443	40.8854	48.686	67.3889	67.477	65.1801	55.1993	70.9141	74.7045	100.962
NOK	MLN8237	3.56733	40.522	52.1704	68.675	71.1782	67.1941	59.2607	73.4868	77.3831	100.361
FHCRC-SCC-1	RETRA	7.94074	51.11	82.9715	90.8189	100.328	107.1	101.362	101.221	101.276	101.621
FHCRC-SCC-1	RETRA	8.23554	50.7817	82.52	92.1256	96.3666	102.214	100.524	100.165	104.463	104.041
FHCRC-SCC-1	RETRA	8.41766	49.7435	80.8432	89.764	99.5509	99.1713	102.544	100.114	99.2555	99.7852
NOK	RETRA	22.1502	46.6145	71.6164	81.7654	95.0461	92.8306	94.7388	92.183	96.0573	103.458
NOK	RETRA	21.844	47.0739	77.4277	84.6776	98.1434	97.3222	97.5098	93.0291	104.086	103.718
NOK	RETRA	24.573	53.6431	81.489	87.6267	99.9356	101.189	101.962	93.5618	104.669	110.387
Cell	Drug (uM)	10	3.33333	1.11111	0.37037	0.123457	0.0411523	0.0137174	0.00457247	0.00152416	0
FHCRC-SCC-1	PF 477736	25.6066	24.7635	16.8183	14.8343	47.8402	86.7503	97.5571	97.7441	101.371	98.6835
FHCRC-SCC-1	PF 477736	25.6352	25.4727	17.3505	14.6605	43.2867	81.8632	91.4324	97.2377	99.9086	97.8821
FHCRC-SCC-1	PF 477736	26.3819	25.1048	16.3347	15.3056	52.9592	84.7396	89.6083	97.3961	97.3354	96.1979
NOK	PF 477736	42.0403	40.2754	37.1971	45.5434	63.1751	82.4887	81.9025	88.3978	92.2453	93.7324
NOK	PF 477736	40.5881	42.3573	39.7027	46.4161	64.5672	81.097	82.5352	91.4838	98.6022	99.0379
NOK	PF 477736	44.598	47.1742	42.8227	47.1456	66.8705	86.0928	84.7523	93.9146	99.2097	99.5106
FHCRC-SCC-1	AZD-1775	18.4768	18.2441	16.1217	17.853	47.2719	98.9545	105.815	101.749	97.5158	100.293
FHCRC-SCC-1	AZD-1775	17.4174	16.9429	15.3373	17.7612	46.2829	96.0837	101.4	96.8627	96.0932	99.9132
FHCRC-SCC-1	AZD-1775	17.3237	16.0837	16.3841	17.0053	46.8441	92.8256	98.5167	99.5154	97.9303	100.548
NOK	AZD-1775	38.7969	46.1716	52.1999	54.3367	79.9588	95.6461	92.9977	90.4613	88.8474	99.9958
NOK	AZD-1775	36.939	48.0957	57.2958	56.9521	77.282	93.8511	98.0859	90.653	94.8904	98.6881
NOK	AZD-1775	39.3227	51.8768	63.1517	60.3527	80.684	97.6602	99.7603	96.6143	98.5886	99.6394
FHCRC-SCC-1	Dasatinib Monohydrate	9.18999	27.816	32.8026	39.3276	40.5	62.0234	84.7472	95.0874	99.775	101.239
FHCRC-SCC-1	Dasatinib Monohydrate	9.20798	26.3032	34.313	37.6115	43.5851	59.429	85.8016	92.4456	96.1837	100.087
FHCRC-SCC-1	Dasatinib Monohydrate	8.68706	24.1483	36.1251	37.5174	40.4401	63.1043	83.9407	93.5944	98.7583	100.215
NOK	Dasatinib Monohydrate	11.5508	19.4001	39.2719	52.5848	68.3558	87.5612	101.623	103.009	102.881	100.004
NOK	Dasatinib Monohydrate	11.2158	18.8996	42.3674	55.3586	68.9201	93.2284	100.063	106.314	105.261	101.267
NOK	Dasatinib Monohydrate	12.0038	19.466	45.1247	59.5637	68.5873	96.8337	104.868	113.161	110.418	106.085
Cell	Drug (nM)	100	25	6.25	1.5625	0.390625	0.0976562	0.0244141	0.00610352	0.00152588	0
FHCRC-SCC-1	Bortezomib (PS-341)	0.890536	1.39626	2.11384	10.7572	91.4142	102.693	100.063	99.5732	97.9469	99.7068
FHCRC-SCC-1	Bortezomib (PS-341)	0.897618	1.62364	1.93712	12.1067	89.7221	98.6811	99.2102	94.918	96.7274	99.2973
FHCRC-SCC-1	Bortezomib (PS-341)	0.855547	1.27676	2.03939	12.6576	85.6508	98.078	97.6549	96.2599	95.3388	97.1389
NOK	Bortezomib (PS-341)	2.06968	3.95517	11.4185	31.4718	88.0171	93.3627	88.7459	88.1487	90.6185	96.2922
NOK	Bortezomib (PS-341)	2.34675	3.41575	9.45402	38.9725	92.9316	97.9559	93.321	87.3651	93.9267	96.1991
NOK	Bortezomib (PS-341)	2.23573	3.74637	10.5947	38.6945	95.6257	104.86	95.7439	93.5787	99.3144	98.3918
