# Supplementary material for: Functional Precision Medicine Identifies Novel Druggable Targets and Therapeutic Options in Head and Neck Cancer
Source: Oxford University Press journal article supplement (doi:10.1158/1078-0432.ccr-17-1339), 2018-03-29
Supplement: 10780432ccr171339-sup-183108_2_supp_4635986_p5t45t.xlsx [file 10780432ccr171339-sup-183108_2_supp_4635986_p5t45t.xlsx]

## Sheet: description
Supplementary file 9: Drug library (120) information and screen results
file	description
FHCRC-SCC-7A	Results for cell culture FHCRC-SCC-7A
FHCRC-SCC-10A	Results for cell culture FHCRC-SCC-10A

## Sheet: FHCRC-SCC-7A
ID	Compound	Target	IC50	Goodness.of.Fit	norm.AUC	Z.score
FHCRC-SCC-7A	Abemaciclib	Cdk4, Cdk6	5.6e-06	0.997892	0.93288	0.430208
FHCRC-SCC-7A	Afatinib	EGFR, HER2	2.4e-06	0.982684	0.549507	-0.876861
FHCRC-SCC-7A	Afuresertib	Akt	2.3e-06	0.978279	0.563595	-1.40946
FHCRC-SCC-7A	Alisertib	Aurora A kinase	6.3e-06	0.993735	0.654129	0.492807
FHCRC-SCC-7A	Allopurinol	xanthine oxidase inhibitor	4.9e-09	0.931308	1.00257	0.0724196
FHCRC-SCC-7A	Alpelisib	PI3K p110	1e-05	0.917902	1.03831	0.958379
FHCRC-SCC-7A	Altretamine	alkylating antineoplastic agent	#N/A	0.958727	1.06265	0.995425
FHCRC-SCC-7A	Apitolisib	mTOR, PI3K, PI3K, PI3K, PI3K	#N/A	0.798208	0.343081	-0.895089
FHCRC-SCC-7A	AT7519	Cdk1, Cdk2	4.1e-08	0.399943	0.191432	-0.956425
FHCRC-SCC-7A	Axitinib	VEGFR1, VEGFR2, VEGFR3 KIT, PDGFR	#N/A	0.968883	0.989104	0.0402751
FHCRC-SCC-7A	AZD1775	Wee1	9.1e-07	0.708406	0.419696	-0.436361
FHCRC-SCC-7A	AZD4547	FGFR 1, FGFR2, FGFR3, &lt;FGFR4, &lt;KDR, &lt;MARKs, &lt;IGF1R	1e-05	0.987541	1.01036	0.818299
FHCRC-SCC-7A	AZD5363	Akt	7e-06	0.976471	0.789283	-0.744754
FHCRC-SCC-7A	AZD6482	PI3K	1e-05	0.865075	1.00553	0.726075
FHCRC-SCC-7A	Belinostat	histone deacetylase	7.3e-07	0.94667	0.464721	-0.0683587
FHCRC-SCC-7A	Binimetinib	Mek	1e-05	0.705445	0.70819	-0.35652
FHCRC-SCC-7A	Bleomycin	inhibition of DNA synthesis	#N/A	0.97437	0.940589	0.352947
FHCRC-SCC-7A	BML-EI388	Chk2	#N/A	0.594544	1.01008	0.493519
FHCRC-SCC-7A	BMS-754807	IGF-1R, InsR	4.8e-06	0.869926	0.600662	0.242473
FHCRC-SCC-7A	Buparlisib	Pan-class I PI3K	1.9e-06	0.968334	0.688254	-0.0433726
FHCRC-SCC-7A	Busulfan	alkylating antineoplastic agent	#N/A	0.408216	1.05191	0.991892
FHCRC-SCC-7A	Cabazitaxel	microtubule inhibitor, taxane	9.8e-07	0.916211	0.516301	0.962731
FHCRC-SCC-7A	Cabozantinib	c-MET, VEGFR2	#N/A	0.503959	0.979206	-0.350202
FHCRC-SCC-7A	Capmatinib	cMET	#N/A	-0.0102417	0.990354	0.306167
FHCRC-SCC-7A	Carfilzomib	20S proteasome inhibitor	3.4e-07	0.999642	0.602032	-0.94663
FHCRC-SCC-7A	Cediranib	VEGFR	1e-05	0.723086	0.98428	0.44244
FHCRC-SCC-7A	Celecoxib	cox-2, cadherin-11	4.1e-08	0.979462	1.00256	-0.150497
FHCRC-SCC-7A	Ceritinib	ALK, IGF-1R, ROS1	8.5e-06	0.974568	1.08273	1.13482
FHCRC-SCC-7A	Cisplatin	platinum alkylating agent, inhibits DNA replication	#N/A	0.946274	0.986267	0.645947
FHCRC-SCC-7A	Cobimetinib	MEK	4.8e-06	0.998877	0.592892	0.0724006
FHCRC-SCC-7A	CPI-0610	BET proteins - BRD2, BRD3, BRD4, BRDT	5.3e-06	0.880209	0.671368	-0.734144
FHCRC-SCC-7A	CPI-203	BRD2/3/4	3.6e-07	0.718162	0.486568	-0.239846
FHCRC-SCC-7A	Crizotinib	ALK, ROS1, MET	4.1e-06	0.999703	0.77145	0.046609
FHCRC-SCC-7A	Cyclophosphamide	alkylating agent, inhibits DNA replication and RNA synthesis	4.9e-09	0.918899	0.989323	0.195892
FHCRC-SCC-7A	Cytarabine	antimetabolite, inhibits DNA synthesis	1.5e-07	0.998624	0.579653	-0.00835874
FHCRC-SCC-7A	Dabrafenib	B-Raf	4.3e-06	0.982745	0.730501	-0.137999
FHCRC-SCC-7A	Dactolisib	PI3K, mTOR	#N/A	0.967782	0.782029	-0.312659
FHCRC-SCC-7A	Dasatinib	Bcr-Abl, Src	#N/A	0.175926	0.683752	0.274322
FHCRC-SCC-7A	Daunorubicin	DNA intercalating agent, anthracycline antitumor antibiotic	1.1e-07	0.985125	0.479819	0.137549
FHCRC-SCC-7A	Defactinib	FAK	#N/A	0.737521	0.935202	-0.268189
FHCRC-SCC-7A	Docetaxel	microtubule inhibitor	#N/A	0.460683	0.455425	0.727042
FHCRC-SCC-7A	Dovitinib	FGFR1, FGFR3, c-KIT, VEGF, PDGFR, CSFR1	5.9e-06	0.905878	0.781664	-0.227892
FHCRC-SCC-7A	Doxorubicin	topoisomerase II inhibitor	8.9e-07	0.996102	0.746711	0.675019
FHCRC-SCC-7A	Duvelisib	PI3K, PI3K	1e-05	0.261479	0.970111	0.378022
FHCRC-SCC-7A	Entinostat	HDAC1, HDAC3	1.6e-06	0.976889	0.490375	-0.71823
FHCRC-SCC-7A	Enzalutamide	Androgen receptor antagonist	4.1e-08	0.768772	1.07534	1.05697
FHCRC-SCC-7A	Epirubicin	topoisomerase II inhibitor	1.1e-06	0.954334	0.732774	0.59212
FHCRC-SCC-7A	Erdafitinib	FGFR	7.1e-06	0.989888	0.822031	0.178853
FHCRC-SCC-7A	Erlotinib	EGFR, ALK, JAK2 mutant (JAK2V617F)	4.1e-08	-0.0250924	0.849436	-0.174599
FHCRC-SCC-7A	Ethinyl estradiol	estrogen hormone	5e-06	0.770801	0.937073	-1.09336
FHCRC-SCC-7A	Etoposide	topoisomerase II inhibitor	1.4e-06	0.992108	0.813704	0.0101553
FHCRC-SCC-7A	Everolimus	mTORC1	4.1e-08	0.566305	0.622867	-0.542583
FHCRC-SCC-7A	Fluorouracil	antimetabolite - thymidylate synthase inhibitor	4.9e-09	0.966406	0.993682	0.450071
FHCRC-SCC-7A	Fulvestrant	selective estrogen receptor degrader	1e-05	0.556031	1.06795	0.600848
FHCRC-SCC-7A	GDC0994	ERK1, ERK2	#N/A	0.979327	0.798511	-1.01938
FHCRC-SCC-7A	Gefitinib	EGFR	#N/A	0.447576	0.723048	-0.61056
FHCRC-SCC-7A	Gemcitabine	antimetabolite - pyrimidine antagonist	#N/A	0.358187	0.262022	0.273172
FHCRC-SCC-7A	GF-109203	PKC, PKC1	1e-05	0.824761	1.01991	0.493478
FHCRC-SCC-7A	GSK2636771	PI3K	#N/A	0.621243	0.911564	-0.067669
FHCRC-SCC-7A	GSK503	EZH2	1e-05	0.209321	0.810591	-1.20015
FHCRC-SCC-7A	Hydroxyurea	ribonucleotide reductase inhibitor	#N/A	0.318957	0.985305	-0.564056
FHCRC-SCC-7A	Ibrutinib	BTK	#N/A	0.962812	0.828318	-0.235007
FHCRC-SCC-7A	Idarubicin	topoisomerase II inhibitor	7.7e-08	0.961313	0.467133	0.182226
FHCRC-SCC-7A	Idelalisib	PI3K P110	1e-05	0.475681	1.04998	0.696173
FHCRC-SCC-7A	Imatinib	Bcr-Abl	7.5e-06	0.981018	0.98042	-0.361127
FHCRC-SCC-7A	Isotretinoin	speculated to affect telomerase enzyme hTERT	1e-05	0.880827	1.13112	1.45822
FHCRC-SCC-7A	Ixabepilone	microtubule inhibitor	4.9e-09	0.547061	0.434381	0.628222
FHCRC-SCC-7A	Lapatinib	EGFR, HER2	1e-05	-0.0106639	0.948022	-0.155523
FHCRC-SCC-7A	Lenalidomide	TNF, IKZF1, IKZF2	1e-05	0.73182	1.04451	0.517907
FHCRC-SCC-7A	Lenvatinib	VEGFR1, VEGFR2, VEGFR3, FGFR1, FGFR2, FGFR3, FGR4, PDGFR, c-KIT, RET	1e-05	0.271035	0.913015	-0.415096
FHCRC-SCC-7A	Linsitinib	IGF-1R	1e-05	0.579284	1.04012	1.32753
FHCRC-SCC-7A	Lucitanib	FGFR1, FGFR2, FGFR3, VEGF1, VEGF2, VEGF3, PDGFR, PDGFR	#N/A	0.368375	0.958885	0.124311
FHCRC-SCC-7A	Megestrol	Progesterone receptor agonist	1e-05	0.883941	1.06746	0.187796
FHCRC-SCC-7A	Methotrexate	folic acid antagonist	#N/A	0.891723	0.94644	0.976658
FHCRC-SCC-7A	Midostaurin	FLT3, PKC, PKC, PKC, Syk, Flk-1, Akt, PKA, c-Kit, FGFR, SRC, PDFR, VEGFR1, VEGFR2	#N/A	0.927411	1.08911	1.07987
FHCRC-SCC-7A	Mitomycin	antitumor antibiotic	3.3e-07	0.908068	0.57597	0.542814
FHCRC-SCC-7A	MK2206	Akt1, Akt2, Akt3	#N/A	0.166808	0.889835	0.164646
FHCRC-SCC-7A	MMAE	microtubule polymerization inhibitor	#N/A	-0.0110302	0.306122	1.17826
FHCRC-SCC-7A	Momelotinib	JAK1, JAK2	#N/A	0.243134	1.00193	0.442855
FHCRC-SCC-7A	Navitoclax	Bcl-2, Bcl-XL,Bcl-w	#N/A	0.64203	0.966566	0.414365
FHCRC-SCC-7A	Neratinib	EGFR, HER1, HER2, HER4	1e-05	0.986895	1.09226	0.850541
FHCRC-SCC-7A	Nilotinib	Bcr-Abl	1e-05	0.8366	1.05119	0.347651
FHCRC-SCC-7A	Niraparib	PARP1, PARP2	6.2e-06	0.99958	0.852181	-0.0887502
FHCRC-SCC-7A	NVP-BGT226	PI3K, PI3K, PI3K, mTORC1, mTORC2	#N/A	0.88614	0.34369	0.0576476
FHCRC-SCC-7A	Olaparib	PARP	#N/A	0.935027	1.02122	0.829699
FHCRC-SCC-7A	Onalespib	Hsp90	4.1e-08	0.675783	0.0190781	-0.885302
FHCRC-SCC-7A	Oprozomib	Proteasome	1e-05	0.0167811	0.013219	-0.563833
FHCRC-SCC-7A	Osimertinib	EGFR	3.8e-06	0.996671	0.734813	-0.216443
FHCRC-SCC-7A	Oxaliplatin	DNA synthesis inhibition	4.8e-06	0.967027	1.04145	1.09946
FHCRC-SCC-7A	Paclitaxel	microtubule inhibitor, taxane	5.1e-08	0.78313	0.388216	-0.680852
FHCRC-SCC-7A	Palbociclib	CDK4, CDK6	#N/A	0.644046	1.03568	0.886451
FHCRC-SCC-7A	Pazopanib	c-KIT, FGFR, PDGFR, VEGFR	1e-05	-0.0165712	1.05576	0.271443
FHCRC-SCC-7A	Pemetrexed	antifolate	5.4e-09	0.683949	0.90462	0.563023
FHCRC-SCC-7A	Pentostatin	purine analog	#N/A	0.0824964	0.971349	0.155068
FHCRC-SCC-7A	Pictilisib	PI3K, PI3K	#N/A	0.346972	0.936324	0.325403
FHCRC-SCC-7A	Pinometostat	DOT-1L	#N/A	0.303005	0.958629	0.0379325
FHCRC-SCC-7A	Ponatinib	Bcr-Abl, VEGF	1e-05	0.945337	1.12175	0.726327
FHCRC-SCC-7A	Poziotinib	EGFR, HER2, HER4	7.2e-06	0.955509	0.68734	-0.497343
FHCRC-SCC-7A	Pralatrexate	antifolate	4.9e-09	0.845235	0.913696	0.728143
FHCRC-SCC-7A	Quizartinib	FLT3	#N/A	0.950886	0.956602	-0.766847
FHCRC-SCC-7A	Regorafenib	VEGFR2, TIE2,	1e-05	0.980974	1.05373	0.763229
FHCRC-SCC-7A	Ribociclib	CDK4, CDK6	#N/A	0.703095	1.02669	1.32882
FHCRC-SCC-7A	Rigosertib	Plk1, PI3K	#N/A	0.353973	0.277335	0.175162
FHCRC-SCC-7A	Rucaparib	PARP1, PARP2, PARP3	9.9e-06	0.989937	1.00429	0.741889
FHCRC-SCC-7A	Ruxolitinib	JAK1, JAK2	1e-05	0.982704	0.925707	-0.659002
FHCRC-SCC-7A	Sepantronium	BIRC5	4.1e-08	0.669293	0.00874029	-0.504119
FHCRC-SCC-7A	SN-38	topoisomerase, active metabolite of irinotecan	4.9e-09	0.631836	0.0466559	-0.668766
FHCRC-SCC-7A	Sorafenib	VEGFR, PDGFR, Raf	#N/A	0.233542	1.02242	0.0788209
FHCRC-SCC-7A	Sunitinib	VEGFR, PDGFR, c-KIT, RET, CD114, CD135	1e-05	0.937487	1.01786	0.724345
FHCRC-SCC-7A	Talazoparib	PARP	7.9e-07	0.991241	0.495775	-0.35919
FHCRC-SCC-7A	Tamoxifen	selective estrogen receptor modulator	#N/A	-0.0481727	0.932103	-0.161205
FHCRC-SCC-7A	Taselisib	PIK3CA	3.1e-06	0.930373	0.68822	0.00431912
FHCRC-SCC-7A	Tazemetostat	EZH2	8.7e-06	0.0998635	0.937387	-0.318836
FHCRC-SCC-7A	Temozolomide	alkylating agent	4.9e-09	0.991725	1.02025	0.78972
FHCRC-SCC-7A	Temsirolimus	mTOR inhibitor	#N/A	0.742774	0.600174	-0.776506
FHCRC-SCC-7A	Teniposide	topoisomerase II inhibitor	7.4e-07	0.893258	0.467051	-0.298141
FHCRC-SCC-7A	Topotecan	topoisomerase I inhibitor	4.9e-09	0.999834	0.228657	-0.755384
FHCRC-SCC-7A	Toremifene	Nonsteroidal antiestrogen	#N/A	0.444742	0.974133	0.0196715
FHCRC-SCC-7A	Trametinib	MEK1, MEK2	9.9e-06	0.811187	0.651162	0.250074
FHCRC-SCC-7A	Vandetanib	VEGFR2, EGFR, RET	2.8e-06	0.785592	0.628924	-0.505092
FHCRC-SCC-7A	Veliparib	PARP1, PARP2	#N/A	0.997965	1.05719	0.582745
FHCRC-SCC-7A	Vemurafenib	BRAF	4.1e-08	0.992467	1.02432	0.433375
FHCRC-SCC-7A	Venetoclax	Bcl2	#N/A	0.433379	1.0478	0.978541
FHCRC-SCC-7A	Vinblastine	microtubule inhibitor	5.9e-08	0.92902	0.376309	0.712047
FHCRC-SCC-7A	Vincristine	microtubule inhibitor	4.9e-06	0.694037	0.288836	0.450318
FHCRC-SCC-7A	Vinorelbine	microtubule inhibitor	1.9e-07	0.967058	0.40387	0.112069
FHCRC-SCC-7A	Vismodegib	SMO receptor antagonist	1e-05	0.811597	1.05311	0.606785
FHCRC-SCC-7A	Vorinostat	histone deacetylase	1.6e-06	0.836953	0.533992	0.0196364

## Sheet: FHCRC-SCC-10A
ID	Compound	Target	IC50	Goodness.of.Fit	norm.AUC	Z.score
FHCRC-SCC-10A	Abemaciclib	Cdk4, Cdk6	5.7e-06	0.95452	0.763864	-0.817227
FHCRC-SCC-10A	Afatinib	EGFR, HER2	#N/A	0.680174	1.19095	2.02555
FHCRC-SCC-10A	Afuresertib	Akt	4.2e-06	0.944613	0.781128	-0.238175
FHCRC-SCC-10A	Alisertib	Aurora A kinase	3.6e-06	0.888476	0.719212	0.725701
FHCRC-SCC-10A	Allopurinol	xanthine oxidase inhibitor	#N/A	-0.0124792	1.03576	0.537587
FHCRC-SCC-10A	Alpelisib	PI3K p110	1e-05	0.648409	0.922105	0.306087
FHCRC-SCC-10A	Altretamine	alkylating antineoplastic agent	5e-06	0.902237	0.960107	-0.897684
FHCRC-SCC-10A	Apitolisib	mTOR, PI3K, PI3K, PI3K, PI3K	#N/A	0.989595	0.716203	0.57057
FHCRC-SCC-10A	AT7519	Cdk1, Cdk2	1.8e-07	0.517661	0.2981	-0.64396
FHCRC-SCC-10A	Axitinib	VEGFR1, VEGFR2, VEGFR3 KIT, PDGFR	#N/A	0.968429	1.12698	1.28822
FHCRC-SCC-10A	AZD1775	Wee1	1.2e-06	0.878437	0.512603	-0.0670784
FHCRC-SCC-10A	AZD4547	FGFR 1, FGFR2, FGFR3, &lt;FGFR4, &lt;KDR, &lt;MARKs, &lt;IGF1R	7.3e-06	0.976849	0.844501	-0.00344502
FHCRC-SCC-10A	AZD5363	Akt	1e-05	0.928086	0.958733	0.486112
FHCRC-SCC-10A	Belinostat	histone deacetylase	9.7e-07	0.975573	0.457511	-0.0975868
FHCRC-SCC-10A	Binimetinib	Mek	#N/A	0.527416	1.42678	3.10132
FHCRC-SCC-10A	Bleomycin	inhibition of DNA synthesis	4.4e-07	0.960108	0.568862	-2.68243
FHCRC-SCC-10A	BML-EI388	Chk2	3.6e-06	0.66224	0.724469	-3.3864
FHCRC-SCC-10A	BMS-754807	IGF-1R, InsR	1.4e-06	0.847261	0.551439	0.017427
FHCRC-SCC-10A	Buparlisib	Pan-class I PI3K	8.7e-06	0.936178	0.900213	1.00247
FHCRC-SCC-10A	Busulfan	alkylating antineoplastic agent	4.6e-06	0.913277	0.973955	-0.0671588
FHCRC-SCC-10A	Cabazitaxel	microtubule inhibitor, taxane	#N/A	0.370129	0.119743	-0.582287
FHCRC-SCC-10A	Cabozantinib	c-MET, VEGFR2	#N/A	0.387547	1.26968	2.37563
FHCRC-SCC-10A	Capmatinib	cMET	#N/A	0.999699	1.06376	1.03908
FHCRC-SCC-10A	Carfilzomib	20S proteasome inhibitor	2.3e-07	0.941558	0.411273	-2.39619
FHCRC-SCC-10A	Cediranib	VEGFR	3.6e-06	0.90562	0.603699	-1.38519
FHCRC-SCC-10A	Celecoxib	cox-2, cadherin-11	#N/A	0.708638	0.863388	-1.85558
FHCRC-SCC-10A	Ceritinib	ALK, IGF-1R, ROS1	3.7e-06	0.988835	0.802906	-1.11072
FHCRC-SCC-10A	Cisplatin	platinum alkylating agent, inhibits DNA replication	4.4e-07	0.894854	0.890413	-0.623394
FHCRC-SCC-10A	Cobimetinib	MEK	4.8e-08	0.0999058	0.62042	0.215703
FHCRC-SCC-10A	CPI-0610	BET proteins - BRD2, BRD3, BRD4, BRDT	#N/A	0.861483	1.50969	3.45935
FHCRC-SCC-10A	CPI-203	BRD2/3/4	#N/A	0.929321	1.42085	3.68922
FHCRC-SCC-10A	Crizotinib	ALK, ROS1, MET	1.5e-07	0.991288	0.343552	-2.36556
FHCRC-SCC-10A	Cyclophosphamide	alkylating agent, inhibits DNA replication and RNA synthesis	5e-06	0.323612	0.885912	-1.18795
FHCRC-SCC-10A	Cytarabine	antimetabolite, inhibits DNA synthesis	1.5e-08	0.991847	0.28644	-1.24279
FHCRC-SCC-10A	Dabrafenib	B-Raf	3e-06	0.981593	0.690757	-0.291619
FHCRC-SCC-10A	Dasatinib	Bcr-Abl, Src	7.1e-06	0.843937	0.545532	-0.267719
FHCRC-SCC-10A	Daunorubicin	DNA intercalating agent, anthracycline antitumor antibiotic	4.9e-09	0.803248	0.300302	-0.645852
FHCRC-SCC-10A	Defactinib	FAK	#N/A	0.932491	1.01278	0.825662
FHCRC-SCC-10A	Docetaxel	microtubule inhibitor	#N/A	0.998499	0.122479	-0.605754
FHCRC-SCC-10A	Dovitinib	FGFR1, FGFR3, c-KIT, VEGF, PDGFR, CSFR1	4.9e-06	0.947322	0.761293	-0.319819
FHCRC-SCC-10A	Doxorubicin	topoisomerase II inhibitor	#N/A	0.943514	0.37038	-0.94442
FHCRC-SCC-10A	Duvelisib	PI3K, PI3K	#N/A	0.136997	1.01624	0.711136
FHCRC-SCC-10A	Entinostat	HDAC1, HDAC3	4.1e-08	0.919662	0.429934	-0.981688
FHCRC-SCC-10A	Enzalutamide	Androgen receptor antagonist	#N/A	0.73628	0.8672	-1.58209
FHCRC-SCC-10A	Epirubicin	topoisomerase II inhibitor	#N/A	0.602422	0.394885	-1.09308
FHCRC-SCC-10A	Erdafitinib	FGFR	2e-06	0.823355	0.591667	-0.820034
FHCRC-SCC-10A	Erlotinib	EGFR, ALK, JAK2 mutant (JAK2V617F)	9.5e-06	0.952063	0.86747	-0.0642284
FHCRC-SCC-10A	Ethinyl estradiol	estrogen hormone	5e-06	-0.0644681	1.15847	3.85755
FHCRC-SCC-10A	Etoposide	topoisomerase II inhibitor	3.6e-07	0.948989	0.747299	-0.5773
FHCRC-SCC-10A	Everolimus	mTORC1	#N/A	0.152684	0.734582	0.0135622
FHCRC-SCC-10A	Fluorouracil	antimetabolite - thymidylate synthase inhibitor	4.7e-06	0.980793	1.09028	2.01606
FHCRC-SCC-10A	Fulvestrant	selective estrogen receptor degrader	9.9e-06	0.793431	1.20076	2.65341
FHCRC-SCC-10A	GDC0994	ERK1, ERK2	4.1e-08	0.137012	1.79153	6.04288
FHCRC-SCC-10A	Gefitinib	EGFR	1e-06	0.994858	0.531188	-1.74922
FHCRC-SCC-10A	Gemcitabine	antimetabolite - pyrimidine antagonist	#N/A	0.982456	0.0629462	-0.714072
FHCRC-SCC-10A	GF-109203	PKC, PKC1	6.2e-07	0.832212	0.399831	-5.05353
FHCRC-SCC-10A	GSK2636771	PI3K	#N/A	0.920459	1.06096	1.57879
FHCRC-SCC-10A	GSK503	EZH2	4.4e-06	0.95476	0.778814	-1.51068
FHCRC-SCC-10A	Hydroxyurea	ribonucleotide reductase inhibitor	4.9e-09	0.422234	1.00365	-0.0579293
FHCRC-SCC-10A	Ibrutinib	BTK	4.1e-08	0.846222	0.943966	0.316061
FHCRC-SCC-10A	Idarubicin	topoisomerase II inhibitor	4.9e-09	0.930364	0.201841	-0.987177
FHCRC-SCC-10A	Idelalisib	PI3K P110	4.1e-08	0.205216	1.06806	0.88312
FHCRC-SCC-10A	Imatinib	Bcr-Abl	4.7e-06	0.927416	0.832165	-1.85393
FHCRC-SCC-10A	Isotretinoin	speculated to affect telomerase enzyme hTERT	5.6e-07	0.385467	0.46422	-3.9704
FHCRC-SCC-10A	Ixabepilone	microtubule inhibitor	5e-06	0.102666	0.0731364	-0.741656
FHCRC-SCC-10A	Lapatinib	EGFR, HER2	1e-05	0.830318	0.784744	-1.76576
FHCRC-SCC-10A	Lenalidomide	TNF, IKZF1, IKZF2	#N/A	0.58921	1.22085	3.25535
FHCRC-SCC-10A	Lenvatinib	VEGFR1, VEGFR2, VEGFR3, FGFR1, FGFR2, FGFR3, FGR4, PDGFR, c-KIT, RET	#N/A	0.0430551	0.96886	0.152378
FHCRC-SCC-10A	Linsitinib	IGF-1R	6.7e-06	0.988233	0.969678	0.553925
FHCRC-SCC-10A	Lucitanib	FGFR1, FGFR2, FGFR3, VEGF1, VEGF2, VEGF3, PDGFR, PDGFR	4.3e-06	0.97979	1.07601	0.925845
FHCRC-SCC-10A	Megestrol	Progesterone receptor agonist	1e-05	0.90917	1.00866	-0.271376
FHCRC-SCC-10A	Methotrexate	folic acid antagonist	#N/A	0.777299	0.808137	0.554128
FHCRC-SCC-10A	Midostaurin	FLT3, PKC, PKC, PKC, Syk, Flk-1, Akt, PKA, c-Kit, FGFR, SRC, PDFR, VEGFR1, VEGFR2	#N/A	0.447197	0.398386	-2.1805
FHCRC-SCC-10A	Mitomycin	antitumor antibiotic	4.9e-09	0.893428	0.120478	-1.51686
FHCRC-SCC-10A	MK2206	Akt1, Akt2, Akt3	#N/A	0.394781	0.776442	-0.627448
FHCRC-SCC-10A	MMAE	microtubule polymerization inhibitor	1e-05	0.195156	0.0505509	-0.962701
FHCRC-SCC-10A	Momelotinib	JAK1, JAK2	1e-05	0.968667	1.02616	0.636082
FHCRC-SCC-10A	Navitoclax	Bcl-2, Bcl-XL,Bcl-w	6.5e-07	0.720644	0.410607	-1.92141
FHCRC-SCC-10A	Neratinib	EGFR, HER1, HER2, HER4	9.5e-06	0.927095	1.29805	1.65593
FHCRC-SCC-10A	Nilotinib	Bcr-Abl	1.2e-06	0.971593	0.79062	-2.39478
FHCRC-SCC-10A	Niraparib	PARP1, PARP2	7.7e-06	0.968886	0.779242	-0.510891
FHCRC-SCC-10A	NVP-BGT226	PI3K, PI3K, PI3K, mTORC1, mTORC2	2.3e-06	0.901003	0.579227	0.987181
FHCRC-SCC-10A	Olaparib	PARP	#N/A	0.960082	0.895704	-0.320275
FHCRC-SCC-10A	Onalespib	Hsp90	#N/A	-0.0535425	0.0122054	-0.913135
FHCRC-SCC-10A	Oprozomib	Proteasome	1e-05	0.350024	0.00559662	-0.691758
FHCRC-SCC-10A	Osimertinib	EGFR	3.4e-06	0.94399	0.748009	-0.142311
FHCRC-SCC-10A	Oxaliplatin	DNA synthesis inhibition	2.5e-06	0.763388	0.87057	0.0541835
FHCRC-SCC-10A	Paclitaxel	microtubule inhibitor, taxane	4.9e-09	0.769226	0.22577	-1.52564
FHCRC-SCC-10A	Palbociclib	CDK4, CDK6	#N/A	0.173688	0.903874	0.163387
FHCRC-SCC-10A	Pazopanib	c-KIT, FGFR, PDGFR, VEGFR	#N/A	0.672511	1.18559	1.60321
FHCRC-SCC-10A	Pemetrexed	antifolate	#N/A	0.13193	1.0009	0.886538
FHCRC-SCC-10A	Pentostatin	purine analog	#N/A	0.485016	0.817229	-1.22398
FHCRC-SCC-10A	Pictilisib	PI3K, PI3K	4.1e-08	0.824638	1.134	2.06845
FHCRC-SCC-10A	Pinometostat	DOT-1L	4.1e-06	0.640139	0.880176	-0.87478
FHCRC-SCC-10A	Ponatinib	Bcr-Abl, VEGF	8.1e-06	0.900569	0.90586	-0.331841
FHCRC-SCC-10A	Poziotinib	EGFR, HER2, HER4	4.1e-08	0.288317	1.68562	2.36408
FHCRC-SCC-10A	Pralatrexate	antifolate	4.9e-09	0.515492	1.20586	1.53255
FHCRC-SCC-10A	Quizartinib	FLT3	9.7e-06	0.980935	1.13789	1.65042
FHCRC-SCC-10A	Regorafenib	VEGFR2, TIE2,	#N/A	0.634046	1.07084	1.016
FHCRC-SCC-10A	Ribociclib	CDK4, CDK6	#N/A	0.986705	1.12233	2.25088
FHCRC-SCC-10A	Rigosertib	Plk1, PI3K	1e-05	0.00179142	0.0600465	-1.05026
FHCRC-SCC-10A	Rucaparib	PARP1, PARP2, PARP3	6.4e-06	0.984972	0.790942	-0.994134
FHCRC-SCC-10A	Ruxolitinib	JAK1, JAK2	1e-05	0.877921	1.04767	0.386631
FHCRC-SCC-10A	Sepantronium	BIRC5	4.1e-08	0.904196	0.0133935	-0.488911
FHCRC-SCC-10A	SN-38	topoisomerase, active metabolite of irinotecan	4.9e-09	0.809202	0.0131288	-0.80252
FHCRC-SCC-10A	Sorafenib	VEGFR, PDGFR, Raf	1e-05	0.625694	0.942222	-0.749965
FHCRC-SCC-10A	Sunitinib	VEGFR, PDGFR, c-KIT, RET, CD114, CD135	5.3e-06	0.9193	0.802368	-0.920862
FHCRC-SCC-10A	Talazoparib	PARP	1e-05	0.777704	0.865419	1.35171
FHCRC-SCC-10A	Tamoxifen	selective estrogen receptor modulator	3.7e-06	0.982776	0.868391	-0.716854
FHCRC-SCC-10A	Taselisib	PIK3CA	#N/A	0.798872	0.988436	1.32787
FHCRC-SCC-10A	Tazemetostat	EZH2	3.9e-06	0.548651	0.901486	-0.861871
FHCRC-SCC-10A	Temozolomide	alkylating agent	5e-06	0.81443	1.14457	3.58132
FHCRC-SCC-10A	Temsirolimus	mTOR inhibitor	9e-06	0.925926	0.92027	0.851761
FHCRC-SCC-10A	Teniposide	topoisomerase II inhibitor	7.1e-07	0.99748	0.463304	-0.312505
FHCRC-SCC-10A	Topotecan	topoisomerase I inhibitor	4.9e-09	0.908978	0.221827	-0.781593
FHCRC-SCC-10A	Toremifene	Nonsteroidal antiestrogen	5.4e-06	0.817777	0.873742	-1.90396
FHCRC-SCC-10A	Trametinib	MEK1, MEK2	4.1e-08	0.541069	0.815184	0.984564
FHCRC-SCC-10A	Vandetanib	VEGFR2, EGFR, RET	6.8e-06	0.764097	1.17861	1.8153
FHCRC-SCC-10A	Veliparib	PARP1, PARP2	#N/A	0.851418	1.0787	0.757659
FHCRC-SCC-10A	Vemurafenib	BRAF	9.7e-06	0.938272	0.879112	-2.12707
FHCRC-SCC-10A	Venetoclax	Bcl2	8.2e-06	0.878377	0.97081	0.221439
FHCRC-SCC-10A	Vinblastine	microtubule inhibitor	4.9e-09	0.833509	0.0513742	-1.10965
FHCRC-SCC-10A	Vincristine	microtubule inhibitor	4.9e-09	0.46755	0.0578981	-0.961329
FHCRC-SCC-10A	Vinorelbine	microtubule inhibitor	4.9e-09	0.943276	0.0714591	-1.48293
FHCRC-SCC-10A	Vismodegib	SMO receptor antagonist	#N/A	0.761844	0.963551	-0.783134
FHCRC-SCC-10A	Vorinostat	histone deacetylase	1.6e-06	0.972322	0.508357	-0.0886479
