# Supplementary material for: Functional Precision Medicine Identifies Novel Druggable Targets and Therapeutic Options in Head and Neck Cancer
Source: Oxford University Press journal article supplement (doi:10.1158/1078-0432.ccr-17-1339), 2018-03-29
Supplement: 10780432ccr171339-sup-183108_2_supp_4635987_p5t45t.xlsx [file 10780432ccr171339-sup-183108_2_supp_4635987_p5t45t.xlsx]

## Sheet: Sheet1
Supplementary file 10: Candidate target genes (CTGs) validation
Gene	viability%	validated*	viability%	viability difference	p-value**	viability%	viability difference	p-value**
	FHCRC-SCC-1		NOK	FHCRC-SCC-1 vs NOK	FHCRC-SCC-1 vs NOK	HFK-1	FHCRC-SCC-1 vs HFK-1	FHCRC-SCC-1 vs HFK-1
UBC	1.27143	TRUE	3.73457	-2.46314	0.0181944	1.38073	-0.109303	0.436952
UBB	1.38279	TRUE	2.84427	-1.46148	0.00348789	1.17415	0.208645	0.16411
MCL1	1.75985	TRUE	44.343	-42.5831	1.44886e-05	65.9271	-64.1673	2.59485e-07
PSMA2	3.58498	TRUE	18.1069	-14.522	7.58153e-05	46.5285	-42.9435	6.42666e-06
RAN	4.79472	TRUE	21.6263	-16.8316	1.78326e-05	49.9084	-45.1137	1.96266e-05
PSMD8	5.78526	TRUE	27.1238	-21.3386	9.26544e-08	40.6973	-34.912	2.71612e-07
TPX2	5.8023	TRUE	26.5236	-20.7213	5.82701e-05	38.6942	-32.8919	0.00062677
PSMA7	7.24012	TRUE	28.3678	-21.1276	1.60959e-05	42.4699	-35.2298	3.85271e-06
IK	7.27361	TRUE	11.2961	-4.02251	0.000789323	46.0816	-38.8079	9.37112e-07
PSMD1	7.35596	TRUE	25.6962	-18.3403	0.000139494	51.3739	-44.0179	4.17738e-07
PSMB4	7.79577	TRUE	31.8768	-24.081	3.60236e-05	49.9241	-42.1284	0.000314127
KIF11	8.76296	TRUE	24.3748	-15.6119	1.53406e-06	44.1599	-35.397	0.00957658
ATP1B3	8.95848	TRUE	25.1307	-16.1722	1.74653e-05	29.9862	-21.0277	0.00017033
PSMA1	9.76585	TRUE	13.5881	-3.82221	0.0169322	62.0212	-52.2553	6.56711e-05
KIF11	9.9306	TRUE	21.9194	-11.9888	1.14565e-05	32.2657	-22.3351	0.000253163
AURKA	11.1328	TRUE	34.9789	-23.8461	0.000181189	33.1282	-21.9954	0.000377374
PLA2G10	11.9808	TRUE	19.1961	-7.21537	1.36e-06	38.6269	-26.6461	0.000697444
PSMB3	12.5871	TRUE	18.7009	-6.11383	0.000995765	37.9214	-25.3343	1.3048e-05
CEACAM7	13.5682	TRUE	27.4531	-13.8849	0.00109787	33.412	-19.8438	0.0483865
NUF2	13.7182	TRUE	30.3791	-16.6609	9.83629e-05	78.7799	-65.0617	5.11488e-06
PSMB1	14.891	TRUE	23.5773	-8.68634	0.00153281	54.8856	-39.9946	0.000366676
WISP2	14.955	TRUE	66.3724	-51.4173	5.66502e-06	74.9948	-60.0398	0.0225449
MYT1	15.1151	TRUE	37.8558	-22.7407	0.00209656	54.0051	-38.89	3.23744e-05
NDC80	15.2364	TRUE	24.9627	-9.72622	0.000660488	30.0798	-14.8434	0.000115059
PSMB7	15.28	TRUE	36.9373	-21.6572	4.51501e-05	57.8594	-42.5794	0.00053547
PSMA4	15.4619	TRUE	23.392	-7.93014	0.0187933	18.9722	-3.5103	0.0709018
PSMA3	16.5344	TRUE	26.1474	-9.61297	0.0331552	28.739	-12.2046	0.0274908
IL17B	16.5744	TRUE	46.3208	-29.7463	3.5096e-05	33.4911	-16.9167	0.0564517
CCT8	16.7387	TRUE	24.4715	-7.73275	0.0257287	38.1918	-21.4531	0.0495778
TUBA1B	18.1658	TRUE	38.8382	-20.6724	2.59323e-05	56.65	-38.4841	0.000210445
NUP107	19.122	TRUE	28.1476	-9.02559	0.0196353	49.9316	-30.8096	0.000119269
TUBA1C	19.5467	TRUE	36.4788	-16.9321	1.44629e-06	45.3023	-25.7556	0.249496
CKAP5	20.0488	TRUE	29.0775	-9.02875	0.00144656	35.2275	-15.1787	0.261237
PSMD3	20.5363	TRUE	24.6797	-4.14346	0.0213138	32.4646	-11.9283	0.0026965
NR5A1	23.453	TRUE	30.9397	-7.48666	0.00196907	48.4272	-24.9742	0.000811225
CHEK1	23.6854	TRUE	46.6549	-22.9695	0.000174261	74.0155	-50.33	0.000544054
TP53	23.9551	TRUE	61.1609	-37.2058	0.000190373	28.1711	-4.21601	0.0961758
UBAP1	24.5802	TRUE	39.5146	-14.9343	7.36752e-05	54.7579	-30.1776	8.22314e-05
PRPH2	25.0301	TRUE	34.15	-9.11997	0.00311456	33.9185	-8.88842	0.0174016
ADCK5	25.4625	TRUE	35.1065	-9.64402	0.0755309	72.3673	-46.9048	0.000264799
DNAH11	27.9471	TRUE	43.0719	-15.1248	0.0374381	22.7788	5.1683	0.0485354
PSMD14	29.225	TRUE	41.2988	-12.0737	0.0224129	69.4974	-40.2724	0.000271452
MARK2	29.8276	TRUE	33.6539	-3.8263	0.111745	21.2523	8.57537	4.86254e-05
FBXL18	31.7172	TRUE	44.931	-13.2138	0.0122766	73.271	-41.5538	0.00426217
TUBB2B	32.268	TRUE	26.1107	6.15723	0.121803	45.5686	-13.3006	0.0196708
WEE1	33.52	TRUE	64.3664	-30.8453	0	N/A	N/A	N/A
JAG1	36.1014	TRUE	72.0148	-35.9134	0.000273783	50.7095	-14.6081	0.0255559
GABRP	36.3368	TRUE	44.028	-7.69124	0.0133836	60.2003	-23.8635	0.0501234
USP41	36.5262	TRUE	29.967	6.55922	0.0177849	27.5386	8.98758	0.010775
UBA52	37.8674	TRUE	25.7581	12.1094	4.69524e-05	45.8912	-8.02373	0.410045
PSMD7	40.4605	TRUE	33.4816	6.97893	0.0953155	54.5963	-14.1358	0.0288455
EPHA3	41.8168	TRUE	45.2707	-3.45384	0.292059	42.3282	-0.511376	0.93952
CPM	41.8571	TRUE	43.471	-1.61389	0.75455	89.9811	-48.124	0.00060861
COL8A1	41.9026	TRUE	40.8545	1.04802	0.736039	14.097	27.8055	0.00026483
TAPBP	42.494	TRUE	22.2815	20.2126	0.000273881	21.3882	21.1058	3.46405e-05
ABCB10	42.7043	TRUE	48.3331	-5.62879	0.133207	46.0736	-3.36933	0.435216
ACTR6	42.761	TRUE	47.2021	-4.4411	0.177565	51.1068	-8.34571	0.441617
PPP2CA	42.7625	TRUE	35.8325	6.93001	0.0682225	9.05943	33.703	6.7058e-05
KREMEN1	43.5059	TRUE	17.3467	26.1592	0.000108482	45.7783	-2.27234	0.480479
CDC25B	43.699	TRUE	47.2045	-3.50551	0.19682	60.0622	-16.3631	0.0770572
FGF4	43.7874	TRUE	46.1912	-2.40379	0.192879	94.3326	-50.5451	0.000569378
ATM	44.9126	TRUE	43.3793	1.53331	0.728663	26.9961	17.9165	0.000364934
NSFL1C	45.3109	TRUE	37.481	7.8299	0.00598913	43.5081	1.8028	0.431504
CTNND2	45.4968	TRUE	44.4229	1.07383	0.847602	53.8304	-8.33365	0.135535
FAT2	46.2187	TRUE	44.49	1.72875	0.444211	44.3751	1.84361	0.819663
SORL1	46.4727	TRUE	38.8022	7.67048	0.0131558	35.8538	10.619	0.0531539
GPT2	46.7172	TRUE	48.7007	-1.98353	0.28982	16.4395	30.2777	1.27372e-05
PSMD2	47.0448	TRUE	31.0728	15.9719	0.000664511	38.9451	8.09962	0.155476
PCDHA10	47.6044	TRUE	31.4785	16.1259	0.00130761	49.9423	-2.33792	0.49724
MAP3K11	49.081	TRUE	46.8482	2.23276	0.337927	27.5089	21.5721	0.000559087
SIGLEC1	49.7773	TRUE	55.6545	-5.87717	0.0993135	36.3264	13.4509	0.12225
DYNC1H1	50.0106	TRUE	58.8033	-8.79264	0.0248286	46.9914	3.01925	0.457688
CHRNA1	51.8048	TRUE	49.642	2.16286	0.657686	59.0377	-7.23288	0.266464
FCRL6	52.3404	TRUE	42.5241	9.81632	0.0104184	46.2765	6.06393	0.292228
RND3	52.553	TRUE	44.1021	8.45088	0.00316191	52.352	0.200985	0.983405
PIP5K1C	54.0535	TRUE	55.3026	-1.24912	0.769236	19.4715	34.582	0.000147463
CENPE	54.1435	TRUE	42.7863	11.3572	0.0570176	84.6751	-30.5316	0.000194197
PI4K2A	54.301	TRUE	62.0022	-7.70117	0.304047	27.8651	26.4359	0.0102294
MPP3	54.5143	TRUE	31.743	22.7713	0.00171166	20.5861	33.9282	2.19796e-05
RPS6KL1	54.8528	TRUE	39.6344	15.2184	0.000150951	60.6276	-5.77484	0.191252
CDC25C	56.9205	TRUE	23.7806	33.1399	3.03579e-05	14.1226	42.7979	8.6109e-06
WEE2	57.2795	TRUE	58.4482	-1.16869	0.684737	39.8663	17.4132	0.00174538
KCTD3	57.708	TRUE	62.2936	-4.58567	0.344674	49.0478	8.66013	0.110995
PSMC2	57.9623	TRUE	44.6372	13.3251	0.0181485	59.2824	-1.32016	0.889673
SPHK2	58.2777	TRUE	62.828	-4.5503	0.252891	22.7684	35.5092	4.0542e-05
CD300LB	58.5486	TRUE	58.2605	0.288102	0.965188	36.1552	22.3934	0.00137143
KCTD2	58.7373	TRUE	34.0521	24.6853	8.61863e-05	41.1721	17.5652	0.00360829
FKBP5	58.8208	TRUE	42.4823	16.3384	0.00617793	54.3631	4.45767	0.441334
TRIM35	58.8932	TRUE	38.928	19.9652	0.00258156	24.8828	34.0105	0.000215968
GZF1	59.4639	TRUE	68.3618	-8.89787	0.0212523	52.6682	6.79572	0.0809764
SLC38A2	59.5253	TRUE	35.8443	23.6809	0.0012304	30.2839	29.2414	6.41064e-05
CD300A	59.9593	TRUE	68.4016	-8.44238	0.00558818	33.4401	26.5191	0.0024008
SPAST	60.5072	TRUE	48.6059	11.9013	0.00195484	36.981	23.5262	0.000395432
BCL2L1	60.7378	TRUE	44.249	16.4888	0.00127378	43.813	16.9248	0.00188544
ZBTB10	60.8042	TRUE	37.5593	23.2449	5.51497e-05	51.8777	8.92648	0.00966083
AHR	60.8679	TRUE	56.6478	4.22008	0.198708	41.5088	19.359	0.0251418
NGFR	61.2982	TRUE	65.5316	-4.23342	0.192908	38.3184	22.9799	0.00812466
GJC3	61.6815	TRUE	33.3606	28.3209	1.07686e-05	44.3214	17.3601	0.00728864
ERF	61.9032	TRUE	59.7077	2.19554	0.145992	38.4419	23.4613	0.103334
PLA2R1	62.0979	TRUE	49.4788	12.6191	0.00169508	33.4463	28.6516	0.0176971
DNAH5	62.1254	TRUE	52.3348	9.79061	0.0145318	33.5776	28.5478	0.0410656
GPR162	62.1282	TRUE	47.7625	14.3656	0.000493707	45.1468	16.9814	3.89826e-05
DSG4	62.1491	TRUE	86.9309	-24.7819	0.0112679	24.0294	38.1197	3.41833e-05
MAL2	63.5878	TRUE	61.9666	1.6212	0.748729	65.6439	-2.05616	0.764405
VSIG2	63.6157	TRUE	67.1117	-3.49597	0.46748	58.2675	5.34817	0.208362
EPHA2	64.1026	TRUE	65.5517	-1.44915	0.640711	34.3918	29.7108	3.57089e-05
CDH23	64.1122	TRUE	45.653	18.4592	0.000444379	51.1991	12.9131	0.307149
CDK2	64.1506	TRUE	70.5262	-6.37561	0.0083954	34.8332	29.3174	8.13233e-05
CHL1	64.7122	TRUE	40.8087	23.9035	1.73682e-05	85.2054	-20.4932	0.062027
TNFRSF9	64.775	TRUE	52.3705	12.4045	0.00869161	50.899	13.876	0.414418
NEK4	64.8136	TRUE	41.2228	23.5908	0.000102473	30.1281	34.6856	7.77075e-05
GABBR2	65.548	TRUE	32.7539	32.7941	1.17468e-05	16.1255	49.4225	1.84174e-06
A2M	66.2918	TRUE	48.0771	18.2147	0.00137656	29.5651	36.7266	0.000173652
CD2	66.463	TRUE	78.2506	-11.7876	0.00300425	64.9979	1.46509	0.713632
PVRL3	66.4748	TRUE	57.5476	8.92727	0.0253298	26.6029	39.8719	7.04576e-06
HHAT	66.6486	TRUE	54.2585	12.3901	0.0145754	28.8583	37.7903	0.00015121
PTK6	67.1333	TRUE	60.1776	6.95571	0.0443757	72.184	-5.05069	0.0838001
PLCH1	67.4859	TRUE	73.2082	-5.72233	0.0261251	34.1171	33.3688	7.08866e-06
PTGER4	67.9326	FALSE	51.7982	16.1345	0.0171558	44.6713	23.2613	0.0119237
IKBKAP	68.1272	TRUE	63.3265	4.80071	0.25532	67.937	0.19021	0.951913
NEK2	68.8773	TRUE	64.2372	4.64006	0.3395	57.2192	11.6581	0.000809286
PCDHAC1	69.2716	TRUE	41.2239	28.0478	8.78037e-06	39.6144	29.6572	5.63714e-05
NSD1	69.3155	FALSE	73.9775	-4.66202	0.0582302	78.2255	-8.91007	0.0724312
PRKDC	70.5732	TRUE	52.3302	18.243	2.1874e-05	44.3938	26.1794	6.96811e-05
SIGLEC5	71.9704	FALSE	51.6572	20.3132	0.000437966	73.7686	-1.79823	0.76946
LAMA3	72.0012	FALSE	61.0405	10.9607	0.0395849	18.6097	53.3915	7.78743e-06
ST3GAL6	72.3326	FALSE	51.1966	21.1361	0.000930406	66.0461	6.28654	0.24037
NTC	72.6213	FALSE	78.2063	-5.58495	1	52.5129
CD7	72.6307	FALSE	54.6644	17.9663	6.91079e-05	41.8119	30.8188	1.19664e-05
CERKL	72.7074	FALSE	61.9759	10.7315	0.00577226	41.6336	31.0738	0.00429931
CLEC1B	73.1599	FALSE	41.7184	31.4415	4.39029e-05	60.7248	12.4351	0.0215808
KLHL18	73.6226	FALSE	47.6193	26.0033	3.57683e-05	61.6011	12.0215	0.490021
AQP7	73.8725	FALSE	50.7617	23.1109	0.00057911	53.0127	20.8598	0.00254975
GK2	74.0892	FALSE	90.9688	-16.8795	0.000793248	60.9854	13.1038	0.323337
CDC25A	74.2222	FALSE	48.2048	26.0174	8.91137e-06	61.0683	13.1539	0.000960102
CDK1	74.2361	FALSE	44.0729	30.1632	0.000150884	41.2126	33.0235	0.00287871
NTC	75.1659	FALSE	73.7388	1.42708	1	40.8814
MSL2	75.7855	FALSE	37.3163	38.4692	2.25447e-06	50.9117	24.8738	0.000261611
VRK3	76.0252	FALSE	62.0794	13.9458	0.00901728	88.4777	-12.4525	0.173781
ABCA7	76.4185	FALSE	66.7817	9.63686	0.0792357	45.3683	31.0503	0.0021306
PIM3	76.5444	FALSE	41.7093	34.8351	1.00205e-05	55.3814	21.163	0.00189016
GAN	76.5668	FALSE	59.1017	17.4651	0.00248306	76.3357	0.231073	0.968998
CCL5	76.8006	FALSE	50.5021	26.2985	0.000236905	49.5167	27.2839	0.0072852
LAMB1	77.8181	FALSE	51.6041	26.2141	0.000475443	36.6552	41.1629	3.73548e-05
HNF4G	77.8283	FALSE	64.8316	12.9967	0.0106043	64.5083	13.32	0.255354
ATP1A2	78.047	FALSE	62.4981	15.5489	0.00256368	48.2225	29.8245	0.0565945
SORCS3	78.3372	FALSE	45.1722	33.165	1.03938e-05	57.045	21.2922	0.0993019
KIF22	78.38	FALSE	67.2218	11.1582	0.00705433	54.7625	23.6176	0.00229639
NEK6	78.7556	FALSE	75.0735	3.68215	0.230905	49.984	28.7716	0.000917496
MTMR12	79.5498	FALSE	61.7113	17.8385	0.0069486	100	-40.7505	0.000202007
CASR	79.859	FALSE	89.2579	-9.39894	0.00924627	54.9703	24.8887	4.21425e-05
CLCN4	80.2176	FALSE	69.201	11.0166	0.00259073	58.8363	21.3813	0.00998285
MAP3K14	80.5374	FALSE	68.0701	12.4673	0.00404488	60.5454	19.992	0.00654144
CHEK2	80.9874	FALSE	57.2683	23.7191	2.08831e-05	26.2871	54.7003	2.11727e-07
CUL5	81.8493	FALSE	54.6111	27.2382	0.000105583	84.6416	-2.79234	0.711581
BRDT	82.1387	FALSE	70.2398	11.8989	0.0117399	86.0133	-3.87458	0.785601
GNS	82.2649	FALSE	57.2672	24.9978	0.000730899	90.1695	-7.90462	0.43574
RET	83.5597	FALSE	55.1644	28.3953	0.00777182	30.9952	52.5645	7.80239e-05
ATRN	83.8276	FALSE	68.8703	14.9573	0.00381715	31.1107	52.7169	0.000835624
TP53RK	83.9893	FALSE	69.6382	14.351	0.00541847	68.4593	15.5299	0.00420382
UCK2	84.5487	FALSE	62.3063	22.2424	0.000699349	12.6662	71.8825	4.73712e-08
KIRREL2	85.1365	FALSE	50.5462	34.5903	1.15182e-05	57.6708	27.4657	0.0155367
PCMTD1	85.9499	FALSE	83.5934	2.35646	0.598412	74.0522	11.8976	0.305046
FBXO28	86.273	FALSE	63.892	22.381	0.000982466	81.3255	4.94756	0.56005
LTK	87.0507	FALSE	51.8142	35.2365	0.00245924	17.7882	69.2625	1.91321e-07
MMD	87.982	FALSE	74.5746	13.4073	0.00789203	76.9759	11.006	0.0190635
CSF3	88.089	FALSE	71.2094	16.8795	0.00449627	75.8975	12.1915	0.0138635
GGH	88.6001	FALSE	74.1383	14.4618	0.000217202	46.2742	42.3259	6.0538e-05
PSMB5	88.8982	FALSE	37.7606	51.1377	2.00392e-06	52.7366	36.1616	1.49342e-05
CNGB3	89.1637	FALSE	78.2999	10.8637	3.22519e-06	45.0401	44.1235	3.759e-05
SORCS2	89.9762	FALSE	60.0083	29.9679	0.000272509	58.6667	31.3095	0.00185273
WEE2-AS1	91.2264	FALSE	67.0802	24.1462	0.011101	40.7504	50.476	0.000439475
PDE5A	92.9038	FALSE	55.8555	37.0483	0.000354142	56.8923	36.0115	0.000844134
CLDN18	95.3468	FALSE	74.0703	21.2765	0.000419233	91.9913	3.35543	0.432492
CHRNB2	96.1353	FALSE	29.3463	66.789	2.84563e-06	30.537	65.5983	2.64127e-06
TUBA8	99.1559	FALSE	57.759	41.3968	3.60671e-05	35.3223	63.8336	1.96407e-06
ENTPD2	99.6122	FALSE	13.6645	85.9477	3.85304e-07	31.9147	67.6975	1.1762e-06
* "TRUE" means cell viabililty% is significantly less than NTC (p < 0.05) in validation test
** p-value is calculated using homoscedastic two-tailed distribution
